# Supplementary material for: Analysis of gene expression in the nervous system identifies key genes and novel candidates for health and disease
Source: Neurogenetics. 2017 Feb 11;18(2):81–95. doi: 10.1007/s10048-017-0509-5 (PMC5359387; doi:10.1007/s10048-017-0509-5)
Supplement: Supplementary file 3 — List of genes associated with each cluster (XLSX 48 kb) [file 10048_2017_509_MOESM3_ESM.xlsx]

## Sheet: Sheet1
Analysis of gene expression in the nervous system identifies key genes and novel candidates for health and disease
Neurogenetics
Sarah M Carpanini, Thomas M Wishart, Thomas H Gillingwater, Jean C Manson and Kim M Summers
Corresponding author: Professor Kim M Summers The Roslin Institute and Royal (Dick) School of Veterinary Studies, University of Edinburgh, Easter Bush, Midlothian, EH25 9RG, UK; kim.summers@roslin.ed.ac.uk
5	6	27	30	35	37	42	45	48	53	56	59	60	66	73	77	82	85	88	89	90	91	96	99	1	14
Nervous system	Astrocytes	Dorsal root ganglia	Nervous system	Oligo-dendrocytes	Cerebellum	Nucleus accumbens, dorsal striatum	Neurons (P17 and P30)	Neurons, lung	Nervous system	Cerebellum	Nervous system	Nervous system	Dorsal root ganglion	Nervous system	Nervous system	Olfactory bulb	Microglia	Dorsal root ganglia	Nervous system	Spinal cord, adult brain	Myelin	Nucleus accumbens, dorsal striatum	Nervous system	Testis	Mitochondria
2900011O08Rik	2310022B05Rik	A330043J11Rik	2900054C01Rik	9630013A20Rik	2900064K03Rik	2310076G05Rik /// Htr1b	1110064A23Rik	Adcy4	9630041G16Rik /// Frrs1l	5330423I11Rik	6330406O05Rik /// Gabrg3	9430021M05Rik	Adam11	2010300C02Rik	2900097C17Rik	Cacng5	3830403N18Rik /// Xlr	1110032F04Rik	4930429B21Rik	Ermn	Atp1b2	A530079E22Rik	A330008L17Rik	0710001D07Rik	1110001J03Rik
A830039N20Rik	2900052N01Rik	Acpp	2900055J20Rik	Adamts4	6430573F11Rik	2900018E21Rik	A930033H14Rik	Afap1l1	Adcy1	5830490A04Rik	Adamts3	Ankrd13d	Armcx1	9130022E09	A930009E05Rik /// Tmem178b	Dlx1	C78513	9530059O14Rik	9330121K16Rik	Glra1	Dbndd2	Ankrd63	Actr3b	1110004E09Rik	Aco2
Aak1	4833413G10Rik	AF529169	A830010M20Rik	AI314604	9530056K15Rik	3110039M20Rik	Adamts1	Ccm2l	Atp2b2	6330436F06Rik	Baiap2	B230343J05Rik /// Fgf12	Elavl2	A230058F20Rik	Adam22	Dlx2	Ccl3	C78859	Cckbr	Gm19439	Mbp	Bcr	Anks1b	1110006O24Rik	Acot13
Agap3	4933431E20Rik	Asic3	Actl6b	Atat1	9630002A11Rik	9130230N09Rik /// LOC102635645	Apcdd1	Cyyr1	C81608	6330510M09Rik	C2cd2l	Cadps	Elavl4	Bai2	Add2	Dlx6os1	Ch25h	C78859 /// Mir138-2	Ccl27a	Gm26673 /// Kcna6	Opalin	Cpne5	B830032F12 /// Kcnq3	1110017D15Rik	Ankrd40
Amer3	5930412G12Rik	Avil	Ajap1	C1ql1	9630005C17Rik	9330156P08Rik	Apold1	Dll4	Cacnb4	9630021D06Rik	Cacna2d3	Cend1	Hspa12a	Camk2b	Atl1	Doc2g	Csf3	Fam184b	Ccl27a /// Ccl27b /// Gm13306 /// Gm2506 /// LOC100861978	Hapln2	Pcdh9	Crym	Cdh8	1110020A21Rik	Apoo
Ank2	A730056I06Rik	Bean1	Arf3	C530044C16Rik	A930017K11Rik	Adcy5	Atp13a5	Dock6	Diras2	Cacna1a	Camkv	Cplx1	Ints6	Celf5	Cds2	Gng4	Ctsc	Fxyd7	Col19a1	Klk6	Plp1	Dclk3	Cdk5r2	1110032A03Rik	Atp5a1
Ankrd34a	AB352356	Claca	Arhgap33	Cldn11	Als2	Adora2a	Cldn5	Egfl7	Frrs1l	Cdh7	Car11	Dnm3	Kcnip4	Chrm1	Gdi1	Gpsm1	Cxcl2	Kctd8	Enc1	Mog	Tmod2	Fam115a	Cnksr2	1110035H17Rik	Atp5c1
Ap3m2	Abhd3	Calcb	Cacna1e	Cnp	Arhgef33	AI593442	Cxcl1	Eng	Gabra1	Cnr1	Chst11 /// Phactr1	Dpp6	Lrrc49	Crtc1	Itfg1	Ms4a15	Ddx6	LOC102634995	Fam189a1	Prr18	Tubb4a	Gabrg3	Gabra4	1500002C15Rik	Atp5d
Apbb1	Acot11	Chrna6	Cdk5r1	Ddr1	Atoh7	Arpp19	Edn1	Erg	Gpr158	Crhr1	Csrnp3	Fgf12	Map1b	Cttnbp2	Jakmip2	Myo16	Fcrls	N28178	Fam81a	Serpinb1b		Mchr1	Gm16039	1700001C02Rik	Atp5f1
Arhgap44	Acsl3	D930028M14Rik	Celf2	Dusp10	C130075A20Rik	Arpp21	Eltd1	Esam	Ndrg3	Fgf14	Elmod1	Gdap1	Map7d2	Ctxn1	Kifap3	Nav2	Fpr1	Rgs4	Kcnt2	Slc18a3		Nrxn1	Hpca	1700001C19Rik	Atp5h
Arhgef7	Acsl6	Dgkh	Cplx2	Enpp6	Camk4	C030004M13Rik	Flt1	Fgd5	Nptx1	Gm20081	Fbxl16	Ggt7	Mast1	Ddn	Mcg1038069 /// Ube2n	Omp	Gpr31b	Trnp1	Kcnv1	Slc6a5		Ptpn5	Kcnq3	1700001F09Rik /// Gm10375 /// Gm10377 /// Gm3676	Atp5j
Atp1a3	Adcy2	Dhh	Cx3cl1	Fam13c	Car8	C030011L09Rik	Fosb	Gja4	Pagr1a /// Prrt2	Gng13	Grm5	Klc1	Nacad	Dlg2	Mllt11	Rab3b	Gpr84	Zdhhc2	Lingo1	Uts2		Sh2d5	Kcns2	1700001G11Rik	Atp5j2
Atp6v1g2	Adcyap1r1	Fam189b	Cyp46a1	Frmd8	Cbln1	Cyld	Foxf2	Gm20748	Phyhip	Itpr1	Grm7	Mapk8ip3	Pafah1b1	Dlg4	Nap1l3	S100a5	Hgsnat		Mpped1	Vamp1		Slc6a1	Plcb1	1700001K19Rik	Atp5k
AW060742	Agpat5	Fam19a4	D3Bwg0562e	Gal3st1	Cbln3	Drd1a	Gper1	Gpr116	Prkcg	Kcnc1	Kcnq5	Pcdha1 /// Pcdha10 /// Pcdha11 /// Pcdha12 /// Pcdha2 /// Pcdha3 /// Pcdha4 /// Pcdha5 /// Pcdha6 /// Pcdha7 /// Pcdha8 /// Pcdha9 /// Pcdhac1 /// Pcdhac2	Rufy2	Dlgap3	Pnma2	Stoml3	Hmox1		Nos1ap			Sowaha		1700001L05Rik	Atp5o
B230217C12Rik	Ahcyl1	Fgf13	D430041D05Rik	Gjc2	Chn2	Gm10421	Gpr4	Higd1b	Rnf112	Kirrel3	Lrrc4c	Rnf157	Rufy3	Jph4	Rtn3	Syt6	Il10		Rasl10a					1700001L19Rik	BC002163 /// Ndufs5
B4galnt4	AK080484 /// Tnfaip2	Fkbp1b	Ensa	Gjc3	Cnpy1	Gng7	Grrp1	Hmcn1	Scn2b	Lrrtm3	Lrrtm4	Rundc3a	Stmn2	Psd	Serinc1		Irak3		Stx1a					1700001O22Rik	Chchd3
Brinp1	Akt2	Frmd3	Erc2	Ick	Crtam	Gpr6	H2-D1	Hspa12b	Sptbn2	Syndig1	Lzts1	Rusc1	Ttll7	Sipa1l1	Snx32		Irg1		Tbr1					1700001P01Rik	Coq3
Brsk2	Aldh5a1	Gcnt2	Fbll1	Il1rap	D4Ertd298e	Gpr88	H2-K1 /// H2-Q5	Kank3	Tmem151b	Xkr6	Lzts3	Sept6	Tubb3		Wdr47		Marco		Ttc9b					1700003E24Rik /// BC061195	Coq5
Bsn	Aldoc	Gfra3	Fbxo45	Insc	Epb4.1	Gprin3	Hspa1a	Kdr	Zbtb18		Nat14	Stmn3	Zc2hc1a		Wdr7		Saa3							1700003F12Rik	Coq7
Calm1 /// Calm2 /// Calm3	Arhgef26	Gm2102	Gabrb3	Lcorl	Erc1	Kcna4	Jun	Ndnf			Neto1	Sult4a1					Supt16							1700003H04Rik	Cox4i1
Camkk1	Atp13a4	Grik1	Gm10419	Lhfpl3	Fat2	Kcnab1	Kcne4	Pdgfrb			Phactr1	Ywhah					Tnf							1700003M02Rik	Cox5a
Camta1	Atp1a2	Hoxd1	Gm10699	Mag	Gabra6	LOC102638425	LOC102635316	Podxl			Ppp1r9a													1700003P14Rik	Cox5b
Cdc42bpa	AW047730	Htr3a	Gm1976	Map4k4	Gm2694	Lrrc10b	Mmrn2	Ptprb			Rab40b													1700006A11Rik	Cox6b1
Clstn1	Baalc	Htr3b	Gria2	Map6d1	Gm5083	Nek2	N4bp3	Rasip1			Rin1													1700006E09Rik	Cyc1
Clstn2	Bcan	Isl2	Gria3	Mobp	Gria4	Oprk1	Nodal	Robo4			Shisa7													1700006J14Rik	Cycs
Dclk1	Btbd17	Kank4	Grin2b	Myrf	Grid2	Pde10a	Nos3	She			Zfp827													1700007B14Rik	D10Jhu81e
Dnajc5	Ccdc88a	Kcnd1	Hpcal4	Nfasc	Grm4	Pde1b	Plat	Sox7																1700007E05Rik	Dlst
Dnajc6	Cdh10	Klhl5	Hrh3	Ninj2	Icmt	Pde7b	Pltp	Tek																1700007G11Rik	Ecsit
Dnm1	Celrr	L1cam	Icam5	Nkx6-2	Il22 /// Iltifb	Penk	Sgms1	Tm4sf1																1700007J10Rik	Fam210a
Dpp10	Chst2	Lpar3	Il1rapl1	Pacs2	Kcnk10	Ppp1r1b	Slc19a3	Tmem204																1700007J24Rik	Gm3244 /// Gm3873 /// Ndufb4
Eno2	Cspg5	Lrsam1	Kcnq2	Plekha1	Lhx1os	Rarb	Slc22a8	Ushbp1																1700007K09Rik	Gm4943 /// Ndufa11
Epb4.1l1	Ctnnd2	Magi1	Kctd13	Sema5a	Mmp24	Rasd2	Slc30a1																	1700007L15Rik	Gm6415 /// Ndufs6
Epm2aip1	Cyhr1	Ncmap	Lancl1	Sema6a	Mpp3	Rgs9	Slc9a3r2																	1700008F19Rik	Idh3a
Fam69b	Cyp2j9	Ngfr	Lgi1	Sema6d	Neurod1	Ryr3	Slco1a4																	1700008F21Rik /// Zfp821	Idh3b
Fbxo41	Daam2	Ntrk1	Lin7b	Serpina3n	Pcp2	Sdr39u1	Thsd1																	1700008I05Rik	Idh3g
Gabrb2	Dab1	Pcdha1	Lrfn5	Sh3gl3	Pde4d	Serpina9	Vwa1																	1700008J07Rik	Immt
Gabrg2	Ddah1	Pirt	Mapk1	Sirt2	Ppp1r17	St8sia3	Zic3																	1700008K24Rik	Mdh2
Gdap1l1	Dio2	Pmp2	Matk	Slain1	Rgs8	Syndig1l																		1700008O03Rik	Mfn2
Gls	Dpy19l3	Pou4f1	Mbd5	Slc44a1	Shf	Unc13c																		1700008P02Rik	Mpc1
Gnl1	Dtna	Ppp1r1c	Mgat5b	Sox2ot	Skor1																			1700009J07Rik	Mrpl4
Gnl3l	E2f6	Prph	Mkl2	Thsd4	Slc1a6																			1700009N14Rik	Mrpl51
Golga7b	Ednrb	Prrxl1	Mmp17	Tmeff2	Trim62																			1700009P17Rik	Ndufa10
Gpr162	Fam107a	Prune2	Myt1l	Tmem125	Uncx																			1700010B08Rik	Ndufa12
Gria1	Fam21	Rab39	Nbea	Tmem163	Zfhx2os																			1700010B13Rik	Ndufa4
Grin1	Fgfr3	Ret	Ncdn	Tmem88b	Zic1																			1700010D01Rik /// Gm5941	Ndufa5
Habp4	Fjx1	Scn10a	Nsg2	Tspan2																				1700010H22Rik	Ndufa6
Kcnma1	Fmn2	Scn11a	Pclo	Tssc4																				1700010I14Rik	Ndufa8
Kif3c	Gabrb1	Scn9a	Pcnxl2	Ucn2																				1700010N08Rik	Ndufa9
Kif5c	Gabrg1	Slc9a9	Pianp	Ugt8a																				1700011A15Rik	Ndufab1
Kifc2	Gfap	Sncg	Ppp3r1	Zfp606																				1700011E24Rik	Ndufb10
Larp6	Gjb6	Stac	Prkce																					1700011I03Rik	Ndufb11
LOC101055948	Gldc	Tlx3	Prmt8																					1700011L22Rik	Ndufb2
Magee1	Gm13111	Tmem132e	Psd3																					1700012A03Rik	Ndufb3
Map3k12	Gm266	Tppp3	Rasgef1a																					1700012B07Rik	Ndufb5
Mapk10	Gm5089	Trpa1	Reps2																					1700012B09Rik	Ndufb6
Mapk8	Gm6556	Trpv1	Rimbp2																					1700012D01Rik /// Tmem194	Ndufb7
Mapk8ip2	Gm7020 /// Lin52	Ttc9	Scn2a1																					1700012L04Rik /// Gm14474 /// Gm14475 /// Gm14476 /// Gm14477 /// Gm14478 /// Gm14479 /// Gm14482 /// Gm14483 /// Gm14484 /// Gm14501	Ndufb8
Mapre3	Gpc5	Ttl	Sgtb																					1700012O15Rik	Ndufb9
Mapt	Gpr37l1	Tusc5	Sh3rf3																					1700012P22Rik	Ndufc1
Micu3	Gprc5b	Vps4b	Slc12a5																					1700013D24Rik	Ndufs1
Nap1l2	Grin2c		Slc25a14																					1700013F07Rik	Ndufs2
Napb	Grin3a		Slc2a13																					1700013G24Rik	Ndufs3
Napg	Grm3		Tmem191c																					1700013H16Rik	Ndufs4
Ncs1	H2afv		Tspyl5																					1700014B07Rik /// LOC102632351	Ndufs5
Ndrg4	Hapln1		Tusc3																					1700015E13Rik	Ndufs7
Necap1	Hdhd2		Wasf1																					1700015F17Rik	Ndufs8
Nmnat2	Hepacam		Wdr13																					1700015G11Rik	Ndufv1
Nrsn1	Hes5																							1700016A09Rik	Ndufv2
Nsf	Htra1																							1700016C15Rik	Ndufv3
Ntrk2	Hus1																							1700016D18Rik	Ogdh
Otub1	Id4																							1700016G14Rik	Pdha1
Otud7a	Igdcc4																							1700016H13Rik	Rhot2
P4htm	Kcne1l																							1700016K19Rik	Samm50
Pacsin1	Lgi4																							1700016P04Rik	Sdha
Pak1	LOC552874 /// St6galnac5																							1700017D01Rik	Sdhb
Pdxp	Lpar4																							1700017G19Rik	Sdhc
Pgbd5	Lrp4																							1700017L05Rik	Suclg1
Pitpna	Megf10																							1700017N19Rik	Tmem70
Pja2	Mertk																							1700018B08Rik	Uqcc1
Ppme1	Mlc1																							1700018B24Rik	Uqcr10
Prepl	Mmd2																							1700018C11Rik	Uqcr11
Prkar1b	Myo6																							1700018F24Rik	Uqcrb
Prrt1	Nat1																							1700018G05Rik	Uqcrc1
Rab11fip4	Ncam1																							1700018L02Rik	Uqcrc2
Rab3a	Ncan																							1700019A02Rik	Uqcrfs1
Rab3c	Ndp																							1700019B03Rik	Uqcrq
Rab6a	Nkain4																							1700019D03Rik	Vegfb
Rab6b	Npas3																							1700019L03Rik
Ralyl	Ntsr2																							1700019L13Rik
Rbfox3	Olfml1																							1700019M22Rik
Rgs17	Pantr1																							1700019N19Rik
Rnf130	Phlpp1																							1700019O17Rik
Rnmt	Plxnb1																							1700019P21Rik
Rps6kl1	Polr3h																							1700020A23Rik
Rpusd1	Pou3f3																							1700020D05Rik
Rtn1	Ppap2b																							1700020N01Rik
Scamp5	Ppp1r3g																							1700020N15Rik /// Gm6812
Scn8a	Prex2																							1700021F07Rik
Sept3	Prkd1																							1700022A21Rik
Sept8	Ptchd2																							1700022F17Rik /// Dcdc2c
Serpini1	Ptdss2																							1700023E05Rik
Sgip1	Ptprz1																							1700023F06Rik
Sh3gl2	Rftn2																							1700023G09Rik
Slc4a10	Rfx4																							1700023H06Rik
Slc6a17	Rgs20																							1700023L04Rik
Slitrk1	Scara3																							1700024B05Rik /// Gm7995
Slitrk4	Sfxn5																							1700024J04Rik
Snap25	Slc12a4																							1700024P04Rik
Snap47	Slc15a2																							1700025F22Rik
Snap91	Slc1a2																							1700026D08Rik
Sncb	Slc1a3																							1700026H06Rik /// LOC102636340
Snrpn	Slc1a4																							1700026J12Rik
Snrpn /// Snurf	Slc30a10																							1700026L06Rik
Sorcs3	Slc39a12																							1700027F06Rik
Spock1	Slc4a4																							1700028I16Rik
Spryd3	Slc7a10																							1700028J19Rik
Stau2	Slitrk2																							1700028P14Rik
Stx1b	Spire1																							1700029F12Rik
Stxbp1	St6galnac5																							1700029H14Rik
Stxbp5l	Taf13																							1700029I15Rik
Sv2a	Tlcd1																							1700029J07Rik
Svop	Tlr3																							1700029M20Rik
Syn1	Tmem229a																							1700029P11Rik
Syn2	Tmem47																							1700030F18Rik
Syngr1	Tnfrsf19																							1700030J22Rik
Syngr3	Tpmt																							1700031L13Rik
Synj1	Tprkb																							1700034E13Rik
Syp	Tril																							1700034F02Rik
Tceal3 /// Tceal5 /// Tceal6	Trim9																							1700034H15Rik
Thy1	Ttyh1																							1700034I23Rik
Tmem151a	Usp54																							1700034J05Rik
Tmem179	Wrnip1																							1700034O15Rik
Trim32																								1700037C18Rik
Trio																								1700040L02Rik
Tspyl4																								1700042B14Rik
Ttc3																								1700042D18Rik
Tubg2																								1700042G07Rik
Unc80																								1700048F04Rik
Vgf																								1700048O20Rik
Vps13c																								1700051A21Rik
Vsnl1																								1700052I22Rik
Vstm2a																								1700052K11Rik
Zfr2																								1700052N19Rik
Zwint																								1700056E22Rik
																								1700057G04Rik
																								1700061F12Rik
																								1700061G19Rik
																								1700061I17Rik
																								1700061N14Rik
																								1700063D05Rik
																								1700063H04Rik
																								1700065I16Rik
																								1700066D14Rik
																								1700067K01Rik
																								1700067P10Rik
																								1700071A11Rik
																								1700074P13Rik
																								1700080E11Rik
																								1700080O16Rik
																								1700084F23Rik
																								1700085D22Rik
																								1700086D15Rik
																								1700086L19Rik
																								1700086P04Rik
																								1700088E04Rik
																								1700093K21Rik
																								1700095A13Rik
																								1700095A21Rik
																								1700095J03Rik
																								1700097M23Rik
																								1700097N02Rik
																								1700099I09Rik
																								1700102P08Rik
																								1700104B16Rik
																								1700106J12Rik
																								1700106J16Rik
																								1700108F19Rik
																								1700109H08Rik
																								1700113H08Rik
																								1700116B05Rik
																								1700120B22Rik
																								1700120E14Rik
																								1700120K04Rik
																								1700123I01Rik
																								1700123K08Rik
																								1700123L14Rik
																								1700125H20Rik
																								1700126A01Rik
																								1700129C05Rik
																								1700129O19Rik
																								1810044D09Rik
																								2010109A12Rik
																								2200002J24Rik
																								2210408I21Rik
																								2610020H08Rik
																								2610318N02Rik
																								2700046G09Rik
																								2700049A03Rik
																								2810029C07Rik
																								2810408A11Rik
																								2810408I11Rik
																								2900092C05Rik
																								3110070M22Rik
																								3300002P09Rik
																								4430402I18Rik
																								4833427G06Rik
																								4921501E09Rik
																								4921504E06Rik
																								4921506M07Rik
																								4921507G05Rik
																								4921507P07Rik
																								4921509A06Rik
																								4921511H03Rik
																								4921511M17Rik /// Gm10057 /// Gm15140 /// Gm15143 /// Gm16445 /// Gm5645 /// Gm5646 /// Gm5947 /// Samt1
																								4921517D22Rik
																								4921522P10Rik
																								4921524L21Rik
																								4921525O09Rik
																								4921527H02Rik
																								4921528I07Rik
																								4921530L21Rik
																								4921531P14Rik
																								4921534H16Rik
																								4921536K21Rik
																								4921539E11Rik
																								4922502D21Rik
																								4930403D09Rik
																								4930404A10Rik
																								4930404F17Rik
																								4930405A07Rik
																								4930405N21Rik
																								4930406D18Rik
																								4930407I10Rik
																								4930412D23Rik
																								4930412O13Rik
																								4930413G21Rik
																								4930414N06Rik
																								4930415F15Rik
																								4930415O20Rik
																								4930417H01Rik
																								4930423K06Rik
																								4930429F24Rik
																								4930430A15Rik
																								4930432K21Rik
																								4930433N12Rik
																								4930435E12Rik
																								4930440C22Rik
																								4930442E04Rik
																								4930442J19Rik
																								4930442L01Rik
																								4930442P07Rik
																								4930442P19Rik
																								4930443O20Rik
																								4930444F02Rik
																								4930444G20Rik
																								4930444P10Rik
																								4930445B03Rik
																								4930448K20Rik
																								4930449C09Rik
																								4930449I24Rik /// Gm3402 /// Gm6309 /// Gm6370
																								4930451G09Rik
																								4930451I11Rik
																								4930452G13Rik
																								4930453H23Rik
																								4930453L07Rik
																								4930453N24Rik
																								4930456K20Rik
																								4930458D05Rik
																								4930463O16Rik
																								4930465K10Rik
																								4930468A15Rik
																								4930469G21Rik /// 4930469G21Rik
																								4930470P17Rik
																								4930471G03Rik
																								4930471M09Rik
																								4930474N05Rik
																								4930474N09Rik
																								4930478P22Rik
																								4930483J18Rik
																								4930487N04Rik
																								4930488L21Rik
																								4930488N24Rik
																								4930503B20Rik
																								4930503E14Rik
																								4930503L19Rik
																								4930504O13Rik
																								4930505A04Rik
																								4930505O20Rik
																								4930507D10Rik
																								4930513N10Rik
																								4930513O06Rik
																								4930515G01Rik
																								4930515I15
																								4930517J16Rik
																								4930517O19Rik
																								4930518C04Rik
																								4930518J20Rik
																								4930519D14Rik
																								4930519G04Rik
																								4930519H02Rik
																								4930519N06Rik
																								4930519P11Rik
																								4930522H14Rik
																								4930523O13Rik
																								4930524B15Rik
																								4930524N10Rik
																								4930524O07Rik
																								4930526F13Rik
																								4930527F18Rik
																								4930527J03Rik
																								4930529F21Rik
																								4930534I15Rik
																								4930542C12Rik
																								4930544G11Rik
																								4930548H24Rik
																								4930549C01Rik
																								4930549O18Rik
																								4930550C14Rik
																								4930550L24Rik
																								4930554P06Rik /// LOC102632493
																								4930555G01Rik /// Gm10338 /// Gm10340 /// Gm10406 /// Gm10408 /// Gm10413 /// Gm16434 /// Gm21103 /// Gm21560 /// Gm2237 /// Gm2888 /// Gm2897 /// Gm3002 /// Gm3012 /// Gm3029 /// Gm3043 /// Gm3047 /// Gm3095 /// Gm3115 /// Gm3127 /// Gm3149 /// Gm3159 /// Gm3173 /// Gm3182 /// Gm3239 /// Gm3248 /// Gm3252 /// Gm3264 /// Gm3269 /// Gm3373 /// Gm3383 /// Gm3424 /// Gm3453 /// Gm3460 /// Gm3476 ///…
																								4930556L07Rik
																								4930557A04Rik
																								4930558K02Rik
																								4930558N01Rik
																								4930562A09Rik
																								4930562C15Rik
																								4930563D23Rik
																								4930563J15Rik
																								4930564C03Rik
																								4930570E03Rik
																								4930571K23Rik
																								4930573O21Rik
																								4930578I06Rik
																								4930579F01Rik
																								4930584F24Rik
																								4930589P08Rik
																								4930591A17Rik
																								4930592C13Rik
																								4930592I03Rik
																								4930593A02Rik
																								4931403G20Rik
																								4931408D14Rik
																								4931417E11Rik
																								4931423N10Rik
																								4931428F04Rik
																								4931431B13Rik
																								4931431F19Rik
																								4931440L10Rik
																								4932414N04Rik
																								4932416H05Rik
																								4932418E24Rik
																								4932439E07Rik
																								4932702P03Rik
																								4932703K07Rik
																								4933400A11Rik
																								4933400F21Rik
																								4933401H06Rik
																								4933402J07Rik
																								4933402N03Rik
																								4933402N22Rik /// Gm5861 /// Gm6460 /// Speer1-ps1
																								4933404G15Rik
																								4933405L10Rik
																								4933405O20Rik
																								4933406C10Rik
																								4933406F09Rik
																								4933406K04Rik
																								4933406P04Rik
																								4933407C09Rik
																								4933409F18Rik
																								4933409L14Rik
																								4933411E08Rik
																								4933411G06Rik
																								4933411K16Rik
																								4933411K20Rik
																								4933412E24Rik
																								4933412L11Rik
																								4933413G19Rik
																								4933414I15Rik
																								4933415F23Rik
																								4933416C03Rik
																								4933416I08Rik
																								4933416M07Rik
																								4933417A18Rik
																								4933417D19Rik
																								4933417O13Rik
																								4933421A08Rik
																								4933421I07Rik
																								4933422A05Rik
																								4933422H20Rik
																								4933423N03Rik
																								4933424C08Rik
																								4933424G06Rik
																								4933424N20Rik
																								4933425D22Rik
																								4933425E08Rik
																								4933425L06Rik
																								4933427E11Rik
																								4933427G17Rik
																								4933428M09Rik
																								4933429H19Rik
																								4933430I17Rik
																								4933432K03Rik
																								4933433G15Rik
																								4933434I20Rik
																								4933435G04Rik
																								4933436I01Rik
																								4933438K21Rik
																								4933439N14Rik
																								4933440M02Rik
																								4933440N22Rik
																								5330409N07Rik
																								5830448L01Rik
																								6430531B16Rik
																								6820408C15Rik
																								6820445E23Rik
																								8030411F24Rik
																								8030474K03Rik
																								9230110C19Rik
																								9330101J02Rik
																								9330102E08Rik
																								9330171B17Rik
																								9530057J20Rik /// LOC102633703
																								9530077C05Rik
																								A330021E22Rik
																								A730035I17Rik
																								A930018P22Rik
																								Aard
																								Abca14
																								Abcc12
																								Abhd16b
																								Abhd2
																								Acbd6
																								Ace
																								Acr
																								Acrv1
																								Acsbg2
																								Actl10
																								Actl7a
																								Actl7b
																								Actl9
																								Actr1a
																								Actrt1
																								Actrt2
																								Actrt3
																								Acyp1
																								Adad1
																								Adad2
																								Adam18
																								Adam1a /// Mapkapk5
																								Adam1b
																								Adam2
																								Adam21
																								Adam24
																								Adam26a
																								Adam3
																								Adam32
																								Adam34
																								Adam5
																								Adam6a
																								Adam6a /// Adam6b
																								Adam6b
																								Adat3
																								Adcy10
																								Adgb
																								Adora3
																								Agbl3
																								Agbl4
																								Agbl5
																								Agpat6
																								Ahdc1
																								AI414330
																								AI429214
																								AI507597
																								AK076783 /// Gm26611
																								AK076909 /// Gm20616 /// Gm20616
																								AK076947
																								Ak8
																								Akap1
																								Akap14
																								Akap3
																								Akap4
																								Aknaos
																								Aldoart1
																								Aldoart2
																								Allc
																								Als2cr11
																								Als2cr12
																								Amhr2
																								Amn1
																								Amz2
																								Angel1
																								Ankef1
																								Ankra2
																								Ankrd36
																								Ankrd42
																								Ankrd54
																								Ankrd61
																								Ankrd7
																								Ankzf1
																								Ap2b1
																								Apobec4
																								Apopt1
																								Aptx
																								Aqp11
																								Aqp7
																								Arih1
																								Arih2
																								Arl13a
																								Armc12
																								Armc3
																								Armc4
																								Armc9
																								Arrdc5
																								Art5
																								Asb1
																								Asb17
																								Asb9
																								Asrgl1
																								Aste1
																								Asz1
																								Atf7ip2
																								Atl3
																								Atoh8
																								Atp1a4
																								Atp6v1e2
																								Atp8b3
																								Atr
																								Atxn2l
																								Atxn7l1
																								Aurkc
																								AV039307
																								Aven
																								AY702102
																								AY702103
																								Aym1
																								Azin2
																								B4galt2 /// Ccdc24
																								B9d1
																								Bag5
																								Banf2
																								Bbs5
																								BC030307
																								BC048507
																								BC048562
																								BC048671
																								BC049762
																								BC051142
																								BC051212
																								BC051628
																								BC061194
																								BC089491
																								BC100451
																								Bcl2l14
																								Bcmo1
																								Best1
																								Boll
																								Bpifa3
																								Brdt
																								C2cd3
																								C530008M17Rik
																								C87436
																								Cabs1
																								Cabyr
																								Cage1
																								Calr3
																								Caps2
																								Capza3
																								Carf
																								Carlr
																								Catsper1
																								Catsper2
																								Catsper3
																								Catsperg1
																								Cby3
																								Ccdc101
																								Ccdc103
																								Ccdc105
																								Ccdc108
																								Ccdc11
																								Ccdc110
																								Ccdc113
																								Ccdc116
																								Ccdc130
																								Ccdc136
																								Ccdc151
																								Ccdc158
																								Ccdc159
																								Ccdc163
																								Ccdc172
																								Ccdc173
																								Ccdc175
																								Ccdc176
																								Ccdc181
																								Ccdc185
																								Ccdc19
																								Ccdc30
																								Ccdc33
																								Ccdc38
																								Ccdc39
																								Ccdc40
																								Ccdc54
																								Ccdc57
																								Ccdc62
																								Ccdc63
																								Ccdc65
																								Ccdc67
																								Ccdc7
																								Ccdc70
																								Ccdc81
																								Ccdc83
																								Ccdc87
																								Ccdc89
																								Ccdc91
																								Ccdc96
																								Ccer1
																								Cchcr1
																								Ccin
																								Ccna1
																								Ccnk
																								Ccpg1os
																								Ccser2
																								Cct6b
																								Cct8l1
																								Cd46
																								Cd55 /// Daf2
																								Cdan1 /// Ttbk2
																								Cdc27
																								Cdca2
																								Cdhr4
																								Cdk19os
																								Cdk5rap2
																								Cdkl3
																								Cdrt4
																								Cdv3
																								Cdyl
																								Cenpv
																								Cep112
																								Cep128
																								Cep162
																								Cep57l1
																								Cep63
																								Cep72
																								Cep83os
																								Cep89
																								Cep95
																								Cetn1
																								Cetn4
																								Cfhr3
																								Chl1
																								Chrna5
																								Chrne
																								Cib4
																								Cir1
																								Cldnd2
																								Clec4g
																								Clgn
																								Clip4
																								Clmn
																								Clpb
																								Cmtm1
																								Cmtm1 /// Cmtm2a
																								Cmtm2a
																								Cmtm2b
																								Cnbd2
																								Cntd1
																								Coil
																								Col20a1
																								Col22a1
																								Comp
																								Cox6b2
																								Cox7b2
																								Cox8c
																								Cpa5
																								Cpeb3
																								Cpsf4l
																								Cpvl
																								Creb3l4
																								Crem
																								Crisp2
																								Crnde
																								Csl
																								Csnk1g2
																								Cst13
																								Cst9
																								Ctag2
																								Ctnna3
																								Cyct
																								Cylc1
																								Cylc2
																								Cyp17a1
																								Cypt1 /// Cypt7 /// Cypt8
																								Cypt12
																								Cypt3
																								Cystm1
																								D11Wsu47e
																								D130020L05Rik
																								D130037M23Rik
																								D16Ertd472e
																								D1Pas1
																								D6Ertd474e
																								D7Ertd443e
																								D830044I16Rik
																								Daf2
																								Daw1
																								Dazl
																								Dbil5
																								Dcaf7
																								Dcp1a
																								Dcp1b
																								Dcst1
																								Dcun1d1
																								Ddhd1
																								Ddi1
																								Ddx19b
																								Ddx20
																								Ddx25
																								Ddx4
																								Dedd
																								Defb19
																								Desi1
																								Dgkeos
																								Diablo
																								Dis3l
																								Dkkl1
																								Dmc1
																								Dmrt1
																								Dmrtb1
																								Dmrtc2
																								Dnaaf1
																								Dnah1
																								Dnah12
																								Dnah2
																								Dnah6
																								Dnah7a
																								Dnah7b /// Dnah7c
																								Dnah8
																								Dnaic2
																								Dnajb13
																								Dnajb3
																								Dnajb6
																								Dnajb7
																								Dnajb8
																								Dnajc18
																								Dnajc5b
																								Dnajc5g
																								Dnal1
																								Dnali1
																								Dpep3
																								Dpf3
																								Dpy19l2
																								Dpysl3
																								Dpysl5
																								DQ554143
																								Drc1
																								Dscaml1
																								Dusp21
																								Dydc1
																								Dydc2
																								Dynll2
																								Dyrk3
																								Dyx1c1
																								Dzip1
																								Efcab10
																								Efcab12
																								Efcab2
																								Efcab3
																								Efcab6
																								Efcab9
																								Efhb
																								Efhc1
																								Egln2
																								Eid3
																								Eif4e
																								Eif4e2
																								Elof1
																								Enkd1
																								Enkur
																								Eno4
																								Enthd1
																								Ep400
																								Eqtn
																								Erich2
																								Erich3
																								Erich6
																								Exoc6 /// Sh3glb1
																								Exosc5
																								Eya4
																								Fabp12
																								Fabp9
																								Fam104a
																								Fam110a
																								Fam122c
																								Fam135b
																								Fam154a
																								Fam154b
																								Fam161a
																								Fam166a
																								Fam170a
																								Fam170b
																								Fam178b
																								Fam181a
																								Fam187b
																								Fam188b
																								Fam209
																								Fam217a
																								Fam221b
																								Fam227a
																								Fam227b
																								Fam229a
																								Fam229b
																								Fam46c
																								Fam47c
																								Fam50b
																								Fam71a
																								Fam71b
																								Fam71d
																								Fam71e1
																								Fam71f1
																								Fam76a
																								Fancd2os
																								Fank1
																								Fbxl13
																								Fbxo15
																								Fbxo24
																								Fbxo36
																								Fbxw10
																								Fbxw27
																								Fbxw5
																								Fem1a
																								Fem1b
																								Fhad1
																								Fhl4
																								Fhl5
																								Fkbp6
																								Fkbpl
																								Fmn1
																								Foxk1
																								Frs3os
																								Fscn3
																								Fsip1
																								Ftmt
																								Fto
																								G6pd2
																								Galntl5
																								Galntl6
																								Gapdhs
																								Ggnbp1
																								Gid4
																								Gk2
																								Gkap1
																								Glb1l3
																								Glipr1l1
																								Glipr1l2
																								Glt6d1
																								Gltpd1
																								Gm10058 /// Gm10096 /// Gm10147 /// Gm10230 /// Gm10486 /// Gm10487 /// Gm10488 /// Gm14525 /// Gm14632 /// Gm14819 /// Gm2005 /// Gm2012 /// Gm2030 /// Gm4297 /// Gm4836 /// Gm5169 /// Gm5934 /// Gm6121
																								Gm101
																								Gm10256 /// Gm10352 /// Gm21677 /// Gm21693 /// Gm21704 /// Gm21708 /// Gm4064 /// Rbmy
																								Gm10308
																								Gm10439 /// Gm15080 /// Gm15085 /// Gm15093 /// Gm15107 /// Gm15114 /// Gm15128 /// Luzp4 /// Ott
																								Gm10638
																								Gm10921 /// Gm10922 /// Gm14345 /// Gm14346 /// Gm14347 /// Gm14351 /// Gm14374 /// Gm21681 /// Gm21950 /// Gm21951 /// Gm2777 /// Gm2799 /// Gm2825 /// Gm2863 /// Gm2913 /// Gm2927 /// Gm3701 /// Gm3706 /// Gm3750 /// Gm3763 /// Gm5925 /// Gmcl1l
																								Gm11149
																								Gm128
																								Gm13139
																								Gm14590 /// Gm14594 /// Gm14595 /// Gm14596 /// Gm14598 /// Gm14625 /// Gm16404 /// Gm16405 /// Gm16430 /// Gm6660 /// Gm6664 /// Gm7958 /// Slxl1
																								Gm14781 /// Mageb5
																								Gm1564
																								Gm16432 /// LOC102632386
																								Gm166
																								Gm19395
																								Gm19723
																								Gm20213
																								Gm20605 /// Lrch4
																								Gm20611
																								Gm20621 /// Gm20621
																								Gm20737 /// Gm20772 /// Gm20773 /// Gm20777 /// Gm20793 /// Gm20795 /// Gm20807 /// Gm20827 /// Gm20831 /// Gm20833 /// Gm20836 /// Gm20851 /// Gm20910 /// Gm20928 /// Gm21310 /// Gm21425 /// Gm21440 /// Gm21454 /// Gm21660 /// Gm21678 /// LOC101056173 /// LOC102642634 /// LOC665918 /// Ssty1
																								Gm20738 /// Gm20747 /// Gm20791 /// Gm20799 /// Gm20801 /// Gm20803 /// Gm20804 /// Gm20805 /// Gm20806 /// Gm20808 /// Gm20809 /// Gm20815 /// Gm20816 /// Gm20818 /// Gm20823 /// Gm20840 /// Gm20841 /// Gm20842 /// Gm20846 /// Gm20847 /// Gm20848 /// Gm20852 /// Gm20854 /// Gm20856 /// Gm20859 /// Gm20861 /// Gm20863 /// Gm20865 /// Gm20867 /// Gm20868 /// Gm20881 /// Gm20887 /// Gm20891 /// Gm2…
																								Gm21283
																								Gm21379 /// Rbm31y
																								Gm2762
																								Gm3120
																								Gm3417 /// Gm3448 /// Tcte3
																								Gm3458
																								Gm364
																								Gm4132
																								Gm4787
																								Gm4871
																								Gm5129
																								Gm5142
																								Gm527
																								Gm550
																								Gm5617
																								Gm568
																								Gm614
																								Gm7008
																								Gm7120
																								Gm7444
																								Gm8140
																								Gm884
																								Gm9558
																								Gm9748
																								Gm9757
																								Gm9828 /// Gm9828
																								Gm9999
																								Gml /// Hemt1
																								Got1l1
																								Gpat2
																								Gpatch2l
																								Grk4
																								Gsdmcl-ps
																								Gsdmcl-ps /// Gsdmcl2
																								Gsg1
																								Gsg2
																								Gsto2
																								Gstt4
																								Gtf2a1l
																								Gtsf1
																								Gtsf1l
																								Gxylt2
																								Gykl1
																								Gzmn
																								H1fnt
																								H2afb1
																								Hcfc2
																								Hdgfl1
																								Hdhd1a
																								Hexim2
																								Hils1
																								Hipk1
																								Hist1h4a /// Hist1h4b /// Hist1h4c /// Hist1h4d /// Hist1h4f /// Hist1h4h /// Hist1h4i /// Hist1h4j /// Hist1h4k /// Hist1h4m /// Hist1h4n /// Hist2h4 /// Hist4h4
																								Hmgb4
																								Hormad1
																								Hoxa4
																								Hoxd3os1
																								Hrasls
																								Hrasls5
																								Hsd17b3
																								Hsf2bp
																								Hsf5
																								Hsfy2
																								Hspa1l
																								Hspa2
																								Hspa4l
																								Hspb9
																								Hyal5
																								Hyal6
																								Hydin
																								Hyls1
																								Hypm
																								Ifltd1
																								Ift122
																								Ift172
																								Igbp1b
																								Il31
																								Inpp4a
																								Insl3 /// Jak3
																								Insl6
																								Ip6k1
																								Ipo5
																								Iqca
																								Iqcd
																								Iqce
																								Iqcf1
																								Iqcf3
																								Iqcf4
																								Iqcf5
																								Iqcg
																								Iqch
																								Iqub
																								Irgc1
																								Itpripl1
																								Izumo1
																								Izumo2
																								Izumo3
																								Jag1
																								Jmy
																								Kat8
																								Katnal2
																								Kcnmb4os1
																								Kcnu1
																								Kctd16
																								Kdm4d
																								Kif17
																								Kif27
																								Kif27 /// LOC102636582
																								Kif2b
																								Kif2c
																								Kif3b
																								Kif9
																								Klhl10
																								Klhl11
																								Knop1
																								Kpna4
																								Kpna6
																								Larp1b
																								Larp1b /// LOC102632135
																								Lca5l
																								Ldhal6b
																								Ldhc
																								Lelp1
																								Lemd1
																								Letm2
																								Lig3
																								Lin7a
																								Lipe
																								Lkaaear1
																								Lmnb2
																								Lmntd2
																								LOC100049077
																								LOC100861615 /// LOC102637138 /// LOC102639715 /// LOC102640699
																								LOC101055670
																								LOC101055837
																								LOC102632897
																								LOC102633575
																								LOC102633691
																								LOC102634076
																								LOC102634243
																								LOC102635192
																								LOC102635985
																								LOC102636217
																								LOC102636733
																								LOC102638039
																								LOC102638080
																								LOC102638722
																								LOC102638947
																								LOC102639888
																								LOC102640879
																								LOC102643079 /// Oscp1
																								Lpcat2b
																								Lrguk
																								Lrp2bp
																								Lrrc18
																								Lrrc23
																								Lrrc27
																								Lrrc34
																								Lrrc36
																								Lrrc46
																								Lrrc48
																								Lrrc51
																								Lrrc56
																								Lrrc57
																								Lrrc6
																								Lrrc63
																								Lrrc69
																								Lrrc71 /// Pear1
																								Lrrc72
																								Lrrc74
																								Lrrc9
																								Lrrcc1
																								Lrriq3
																								Lrriq4
																								Lrwd1
																								Ltn1
																								Ly6k
																								Lyar
																								Lypd4
																								Lyrm1
																								Lyrm7
																								Lyzl1
																								Lyzl4
																								Lyzl6
																								Lztfl1
																								M1ap
																								Maats1
																								Mad2l2
																								Mael
																								Mak
																								Map2k7
																								Map7
																								Mapk15
																								Mapk6
																								March10
																								March11
																								Mbd3l1
																								Mdh1b
																								Mea1
																								Med20 /// Usp49
																								Med26
																								Med9os
																								Meig1
																								Meiob
																								Mesp1
																								Mettl4-ps1 /// Spdya
																								Mex3d
																								Mfap3l
																								Mib1
																								Micalcl
																								Mif
																								Mllt10
																								Mmel1
																								Mns1
																								Mocs3
																								Mok
																								Morc2b
																								Morn1
																								Morn2
																								Morn3
																								Morn5
																								Mospd4
																								Mroh2b
																								Mroh4
																								Mroh9
																								Ms4a13
																								Msh4
																								Msl3l2
																								Mtl5
																								Mtmr9
																								Mum1
																								Mxd4
																								Mycbpap
																								Myl10
																								Naa11
																								Naa30
																								Nasp
																								Nbr1
																								Ndst4
																								Ndufaf3
																								Nek4
																								Nipsnap3a
																								Nkapl
																								Nkx2-6
																								Nlrp14
																								Nme5
																								Nme8
																								Nmnat3
																								Nmt2
																								Nol4
																								Nol4l
																								Nol8
																								Noxred1
																								Nphp1
																								Nr0b1
																								Nr6a1
																								Nsun7
																								Nt5c1b
																								Nudt18
																								Nup205
																								Nupl1
																								Nupl2
																								Nupr1l
																								Nutm1
																								Oaz3
																								Odf1
																								Odf2
																								Odf3
																								Odf4
																								Olfr112
																								Osbp2
																								Osbpl10
																								Otub2
																								Otud3
																								Ovol2
																								Oxct2a
																								P2rx3
																								Pabpc2
																								Pabpc6
																								Papolb
																								Pask
																								Pbp2
																								Pbx4
																								Pcsk4
																								Pdcl2
																								Pdha2
																								Pdilt
																								Pdzd9
																								Pebp4
																								Pex3
																								Pfn3
																								Pfn4
																								Pgk2
																								Pgp
																								Phf7
																								Phkg2
																								Phospho2
																								Pias2
																								Pifo
																								Pih1d2
																								Piwil1
																								Piwil2
																								Pkd2l1
																								Pkd2l2
																								Pkdrej
																								Pkib
																								Pla2g2c
																								Pla2g6
																								Plac8l1
																								Plcz1
																								Pld6
																								Pldi
																								Pmfbp1
																								Pnma1
																								Poc1b
																								Poll
																								Pom121l12
																								Pom121l2
																								Pomt2
																								Poteg
																								Ppapdc2
																								Pphln1
																								Ppm1d
																								Ppp1r11
																								Ppp1r2
																								Ppp1r2-ps7
																								Ppp1r2-ps9
																								Ppp1r32
																								Ppp1r36
																								Ppp1r42
																								Ppp3cc
																								Ppp3r2
																								Ppp4r1l-ps
																								Prdx6b
																								Prkag2
																								Prkag2os1
																								Prm1
																								Prm2
																								Prm3
																								Prn /// Prnd
																								Proca1
																								Prok2
																								Proscos
																								Prox2
																								Prps1l1
																								Prr22
																								Prr27
																								Prr30
																								Prss21
																								Prss23os
																								Prss37
																								Prss39
																								Prss40
																								Prss42
																								Prss44
																								Prss45
																								Prss51
																								Prss52
																								Prss54
																								Prss55
																								Prss58
																								Psma8
																								Psmc3ip
																								Psmf1
																								Ptar1
																								Ptchd3
																								Pth2
																								Ptpdc1
																								Ptpn20
																								Ptpn4
																								Pwwp2b
																								Pxt1
																								Qrich2
																								Rabepk
																								Radil
																								Rai14
																								Ralgps1
																								Ranbp17
																								Rasl2-9
																								Rbakdn
																								Rbm44
																								Rbm46
																								Rbm46os
																								Rbm4b
																								Rbmxl2
																								Rcor3
																								Rffl
																								Rfx2
																								Rfx3
																								Rfx8
																								Rhbdd3
																								Ribc1
																								Ribc2
																								Riiad1
																								Rimbp3
																								Rmdn2
																								Rnaseh2a
																								Rnf126
																								Rnf133
																								Rnf138
																								Rnf138rt1
																								Rnf139
																								Rnf148
																								Rnf151
																								Rnf17
																								Rnf19a
																								Rnf24
																								Rnf32
																								Rnf38
																								Rnls
																								Ropn1
																								Ropn1l
																								Rpgrip1
																								Rpl39l
																								Rsph1
																								Rsph3a /// Rsph3b
																								Rsph6a
																								Rtdr1
																								Samd4
																								Samt3
																								Satl1
																								Saysd1
																								Sclt1
																								Scml2
																								Scp2d1
																								Sdccag3
																								Sec1
																								Sel1l2
																								Sept10
																								Sept12
																								Serf1
																								Serpina3a
																								Sgms2
																								Sh2d6
																								Sh3d21
																								Shcbp1l
																								Siah2
																								Skp2
																								Slain2
																								Slc13a5
																								Slc16a7
																								Slc22a14
																								Slc22a16
																								Slc22a21
																								Slc25a2
																								Slc25a31
																								Slc25a41
																								Slc25a54
																								Slc26a8
																								Slc2a3
																								Slc2a5
																								Slc35g3
																								Slc36a3
																								Slc6a16
																								Slc9b1
																								Slco6b1
																								Slco6c1
																								Slco6d1
																								Slfn5os
																								Slfnl1
																								Slx4
																								Smc1b
																								Smco2
																								Smcp
																								Smim23
																								Smpd5
																								Sncaip
																								Socs7
																								Sox30
																								Sox5
																								Spa17
																								Spaca1
																								Spaca3
																								Spaca4
																								Spaca6
																								Spaca7
																								Spag16
																								Spag17
																								Spag4
																								Spag6
																								Spag8
																								Spam1
																								Spanxn4
																								Spata1
																								Spata16
																								Spata17
																								Spata18
																								Spata19
																								Spata21
																								Spata24
																								Spata25
																								Spata3
																								Spata31d1d
																								Spata33
																								Spata4
																								Spata6
																								Spata7
																								Spata9
																								Spatc1
																								Spatc1l
																								Spats1
																								Spdya
																								Spdyb
																								Speer4a
																								Speer4f
																								Spef2
																								Spem1
																								Spert
																								Spesp1
																								Spn-ps
																								Spo11
																								Spz1
																								Srpk2
																								Ssmem1
																								Ssx2ip
																								Ssxb1 /// Ssxb11 /// Ssxb6
																								St6galnac2
																								Stag3
																								Stamos
																								Stard6
																								Stk31
																								Stk33
																								Stk36
																								Stpg1
																								Stra8
																								Stx17
																								Styxl1
																								Sufu
																								Sugp2
																								Sun3
																								Sun5
																								Supt20
																								Svip
																								Syce1
																								Syce1l
																								Syce3
																								Sycp1
																								Sycp2
																								Sycp3
																								Syngr4
																								Synj2
																								Tarbp2
																								Tas1r1
																								Tbata
																								Tbc1d21
																								Tbc1d22bos
																								Tbl2
																								Tbp
																								Tbpl1
																								Tcam1
																								Tcea2
																								Tcfl5
																								Tchp
																								Tcp10a /// Tcp10b
																								Tcp10a /// Tcp10b /// Tcp10c
																								Tcp11
																								Tcte1
																								Tcte2
																								Tctex1d1
																								Tctex1d2
																								Tctn2
																								Tdrd1
																								Tdrd12
																								Tdrd5
																								Tdrd9
																								Tekt1
																								Tekt2
																								Tekt3
																								Tekt4
																								Tekt5
																								Tepp
																								Tescl
																								Tesk1
																								Tex101
																								Tex12
																								Tex13a
																								Tex14
																								Tex18
																								Tex19.2
																								Tex21
																								Tex22
																								Tex24
																								Tex29
																								Tex33
																								Tex35
																								Tex36
																								Tex37
																								Tex38
																								Tex40
																								Tex43
																								Tfb1m
																								Tgif2lx1 /// Tgif2lx2
																								Theg
																								Thop1
																								Timm8a2
																								Tktl2
																								Tmbim7
																								Tmc7
																								Tmco2
																								Tmco5
																								Tmco5b
																								Tmem190
																								Tmem194
																								Tmem210
																								Tmem217
																								Tmem225
																								Tmem232
																								Tmem239
																								Tmem247
																								Tmem30c
																								Tmem39b
																								Tmem53
																								Tmem89
																								Tmsb15a
																								Tnks
																								Tnp1
																								Tnp2
																								Tomm20l
																								Toporsl
																								Tpgs2
																								Trim17
																								Trim36
																								Trim37
																								Trim42
																								Trim69
																								Triml1
																								Trmt10a
																								Trp53tg5
																								Trpd52l3
																								Tsacc
																								Tsc22d4
																								Tsga13
																								Tsga8
																								Tsks
																								Tsnaxip1
																								Tssk1
																								Tssk2
																								Tssk3
																								Tssk4
																								Tssk6
																								Tsx
																								Ttbk2
																								Ttc16
																								Ttc18
																								Ttc21a
																								Ttc21b
																								Ttc23l
																								Ttc25
																								Ttc29
																								Ttc30a2
																								Ttc34
																								Ttc39d
																								Ttc7
																								Ttll10
																								Ttll13
																								Ttll6
																								Ttll8
																								Ttll9
																								Tuba3a /// Tuba3b
																								Tulp2
																								Txndc2
																								Txndc8
																								Txnl4b
																								Txnrd3
																								Uba1y
																								Ube2d2b
																								Ube2j1
																								Ube2u
																								Ubl4b
																								Ubqln3
																								Ubqlnl
																								Ubr7
																								Ubxn10
																								Ubxn11
																								Ubxn6
																								Ulk4
																								Upf3a
																								Urb1
																								Usp12
																								Usp44
																								Usp50
																								Vprbp
																								Vps13a
																								Vwa3a
																								Vwa3b
																								Wbp2nl
																								Wbscr25
																								Wbscr28
																								Wdfy1
																								Wdpcp
																								Wdr16
																								Wdr20rt
																								Wdr27
																								Wdr31
																								Wdr38
																								Wdr48
																								Wdr53
																								Wdr60
																								Wdr62
																								Wdr63
																								Wdr64
																								Wdr65
																								Wdr66
																								Wdr96
																								Wfdc15a
																								Xk
																								Xkr8
																								Xpo7
																								Ybx2
																								Ypel1
																								Zbbx
																								Zbtb3
																								Zbtb32
																								Zbtbd6
																								Zc2hc1c
																								Zc3h14
																								Zcchc13
																								Zdhhc11
																								Zdhhc19
																								Zdhhc25
																								Zfand3
																								Zfand4
																								Zfand5
																								Zfp37
																								Zfp389
																								Zfp39
																								Zfp474
																								Zfp541
																								Zfp558
																								Zfp574
																								Zfp597
																								Zfp819
																								Zfp956
																								Zfy1 /// Zfy2
																								Zfyve1
																								Zhx3
																								Zic5
																								Zmynd10
																								Zmynd12
																								Zmynd15
																								Znhit2
																								Znrd1as
																								Znrf4
																								Zp3r
																								Zpbp
																								Zpbp2
																								Zswim2
																								Zswim3
