# Supplementary material for: Analysis of gene expression in the nervous system identifies key genes and novel candidates for health and disease
Source: Neurogenetics. 2017 Feb 11;18(2):81–95. doi: 10.1007/s10048-017-0509-5 (PMC5359387; doi:10.1007/s10048-017-0509-5)
Supplement: Supplementary file 4 — List of human diseases associated with genes in each clusters (XLSX 45 kb) [file 10048_2017_509_MOESM4_ESM.xlsx]

## Sheet: 5_Neuronal general
Analysis of gene expression in the nervous system identifies key genes and novel candidates for health and disease
Neurogenetics
Sarah M Carpanini, Thomas M Wishart, Thomas H Gillingwater, Jean C Manson and Kim M Summers
Corresponding author: Professor Kim M Summers The Roslin Institute and Royal (Dick) School of Veterinary Studies, University of Edinburgh, Easter Bush, Midlothian, EH25 9RG, UK; kim.summers@roslin.ed.ac.uk
Gene	OMIM	Disease
ANK2	OMIM:600919	Cardiac Arrhythmia, Ankyrin-B-Related
ATP1A3	OMIM:128235	Dystonia 12
ATP1A3	OMIM:601338	Cerebellar Ataxia, Areflexia, Pes Cavus, Optic Atrophy, and Sensorineural Hearing Loss
ATP1A3	OMIM:614820	Alternating Hemiplegia of Childhood 2
CALM1	OMIM:614916	Ventricular Tachycardia, Catecholaminergic Polymorphic, 4
CALM1	OMIM:616247	Long QT Syndrome 14
CAMTA1	OMIM:614756	Cerebellar Ataxia, Nonprogressive, with Mental Retardation
DNAJC5	OMIM:204300	Ceroid Lipofuscinosis, Neuronal, 4a, Autosomal Recessive
DNAJC6	OMIM:615528	Parkinson Disease 19, Juvenile-Onset
DNM1	OMIM:616346	Epileptic Encephalopathy, Early Infantile, 31
GABRG2	OMIM:607681	Epilepsy, Childhood Absence, Susceptibility to, 2
GABRG2	OMIM:611277	Generalized Epilepsy with Febrile Seizures Plus, Type 3
GRIN1	OMIM:614254	Mental Retardation, Autosomal Dominant 8
KCNMA1	OMIM:609446	Generalized Epilepsy and Paroxysmal Dyskinesia
KIF5C	OMIM:615282	Cortical Dysplasia, Complex, with Other Brain Malformations 2
MAPT	OMIM:168600	Parkinson Disease, Late-Onset
MAPT	OMIM:172700	Pick Disease of Brain
MAPT	OMIM:260540	Parkinson-Dementia Syndrome
MAPT	OMIM:600274	Frontotemporal Dementia
MAPT	OMIM:601104	Supranuclear Palsy, Progressive, 1
NECAP1	OMIM:615833	Epileptic Encephalopathy, Early Infantile, 21
NTRK2	OMIM:613886	Obesity, Hyperphagia, and Developmental Delay
SCN8A	OMIM:614306	Cognitive Impairment with or without Cerebellar Ataxia
SCN8A	OMIM:614558	Epileptic Encephalopathy, Early Infantile, 13
SERPINI1	OMIM:604218	Encephalopathy, Familial, with Neuroserpin Inclusion Bodies
SLC6A17	OMIM:616269	Mental Retardation, Autosomal Recessive 48
SLITRK1	OMIM:137580	Gilles De La Tourette Syndrome
SLITRK1	OMIM:613229	Trichotillomania
SNAP25	OMIM:616330	Myasthenic Syndrome, Congenital, 18
SNCB	OMIM:127750	Dementia, Lewy Body
SNRPN	OMIM:176270	Prader-Willi Syndrome
SNRPN	OMIM:209850	Autism
STX1B	OMIM:616172	Generalized Epilepsy with Febrile Seizures Plus, Type 9
STXBP1	OMIM:612164	Epileptic Encephalopathy, Early Infantile, 4
SYN1	OMIM:300491	Epilepsy, X-Linked, with Variable Learning Disabilities and Behavior Disorders
SYN2	OMIM:181500	Schizophrenia
SYNJ1	OMIM:615530	Parkinson Disease 20, Early-Onset
SYP	OMIM:300802	Mental Retardation, X-Linked 96
TRIM32	OMIM:254110	Muscular Dystrophy, Limb-Girdle, Type 2H					`
TRIM32	OMIM:615988	Bardet-Biedl Syndrome 11

## Sheet: 6_Astrocytes
Gene	OMIM	Disease
AKT2	OMIM:125853	Diabetes Mellitus, Noninsulin-Dependent
AKT2	OMIM:240900	Hypoinsulinemic Hypoglycemia with Hemihypertrophy
ALDH5A1	OMIM:271980	Succinic Semialdehyde Dehydrogenase Deficiency
ATP1A2	OMIM:104290	Alternating Hemiplegia of Childhood 1
ATP1A2	OMIM:602481	Migraine, Familial Hemiplegic, 2
DTNA	OMIM:604169	Left Ventricular Noncompaction 1
EDNRB	OMIM:277580	Waardenburg Syndrome, Type 4A
EDNRB	OMIM:600155	Hirschsprung Disease, Susceptibility to, 2
EDNRB	OMIM:600501	Abcd Syndrome
FGFR3	OMIM:100800	Achondroplasia
FGFR3	OMIM:109800	Bladder Cancer
FGFR3	OMIM:114500	Colorectal Cancer
FGFR3	OMIM:146000	Hypochondroplasia
FGFR3	OMIM:149730	Lacrimoauriculodentodigital Syndrome
FGFR3	OMIM:162900	Nevus, Epidermal
FGFR3	OMIM:187600	Thanatophoric Dysplasia, Type I
FGFR3	OMIM:187601	Thanatophoric Dysplasia, Type II
FGFR3	OMIM:273300	Testicular Germ Cell Tumor
FGFR3	OMIM:602849	Muenke Syndrome
FGFR3	OMIM:603956	Cervical Cancer
FGFR3	OMIM:610474	Camptodactyly, Tall Stature, and Hearing Loss Syndrome
FGFR3	OMIM:612247	Crouzon Syndrome with Acanthosis Nigricans
FGFR3	OMIM:616482	Achondroplasia, Severe, with Developmental Delay and Acanthosis Nigricans
FMN2	OMIM:616193	Mental Retardation, Autosomal Recessive 47
GFAP	OMIM:203450	Alexander Disease
GJB6	OMIM:129500	Clouston Syndrome
GJB6	OMIM:220290	Deafness, Autosomal Recessive 1A
GJB6	OMIM:304400	Deafness, X-Linked 2
GJB6	OMIM:612643	Deafness, Autosomal Dominant 3b
GJB6	OMIM:612645	Deafness, Autosomal Recessive 1B
GLDC	OMIM:605899	Glycine Encephalopathy
HEPACAM	OMIM:604004	Megalencephalic Leukoencephalopathy with Subcortical Cysts 1
HEPACAM	OMIM:613925	Megalencephalic Leukoencephalopathy with Subcortical Cysts 2A
HEPACAM	OMIM:613926	Megalencephalic Leukoencephalopathy with Subcortical Cysts 2b, Remitting, with or without Mental Retardation
HTRA1	OMIM:600142	Cerebral Arteriopathy, Autosomal Recessive, with Subcortical Infarcts and Leukoencephalopathy
HTRA1	OMIM:610149	Macular Degeneration, Age-Related, 7
LRP4	OMIM:212780	Cenani-Lenz Syndactyly Syndrome
LRP4	OMIM:614305	Sclerosteosis 2
LRP4	OMIM:616304	Myasthenic Syndrome, Congenital, 17
MEGF10	OMIM:614399	Myopathy, Areflexia, Respiratory Distress, and Dysphagia, Early-Onset
MERTK	OMIM:613862	Retinitis Pigmentosa 38
MLC1	OMIM:604004	Megalencephalic Leukoencephalopathy with Subcortical Cysts 1
MYO6	OMIM:606346	Deafness, Autosomal Dominant 22
MYO6	OMIM:607821	Deafness, Autosomal Recessive 37
NDP	OMIM:305390	Exudative Vitreoretinopathy 2, X-Linked
NDP	OMIM:310600	Norrie Disease
PTPRZ1	OMIM:600263	Helicobacter Pylori Infection, Susceptibility to
SLC1A3	OMIM:612656	Episodic Ataxia, Type 6
SLC30A10	OMIM:613280	Hypermanganesemia with Dystonia, Polycythemia, and Cirrhosis
SLC4A4	OMIM:604278	Renal Tubular Acidosis, Proximal, with Ocular Abnormalities and Mental Retardation
TLR3	OMIM:609423	Human Immunodeficiency Virus Type 1, Susceptibility to
TPMT	OMIM:610460	Thiopurine S-Methyltransferase Deficiency

## Sheet: 27_Neuronal DRG
Gene	OMIM	Disease
BEAN1	OMIM:117210	Spinocerebellar Ataxia 31
DHH	OMIM:233420	46,xy Sex Reversal 7
DHH	OMIM:607080	46,xy Gonadal Dysgenesis, Partial, with Minifascicular Neuropathy
GCNT2	OMIM:116700	Cataract 13 with Adult I Phenotype
L1CAM	OMIM:303350	MASA Syndrome
L1CAM	OMIM:304100	Corpus Callosum, Partial Agenesis of, X-Linked
L1CAM	OMIM:307000	Hydrocephalus Due to Congenital Stenosis of Aqueduct of Sylvius
LRSAM1	OMIM:614436	Charcot-Marie-Tooth Disease, Axonal, Type 2p
NTRK1	OMIM:155240	Thyroid Carcinoma, Familial Medullary
NTRK1	OMIM:256800	Insensitivity to Pain, Congenital, with Anhidrosis
PRPH	OMIM:105400	Amyotrophic Lateral Sclerosis 1
RET	OMIM:142623	Hirschsprung Disease, Susceptibility to, 1
RET	OMIM:155240	Thyroid Carcinoma, Familial Medullary
RET	OMIM:162300	Multiple Endocrine Neoplasia, Type IIB
RET	OMIM:164761	Rearranged During Transfection Protooncogene
RET	OMIM:171300	Pheochromocytoma Pheochromocytoma, Susceptibility to
RET	OMIM:171400	Multiple Endocrine Neoplasia, Type IIA
RET	OMIM:191830	Renal Hypodysplasia/Aplasia 1
RET	OMIM:209880	Central Hypoventilation Syndrome, Congenital
SCN10A	OMIM:615551	Episodic Pain Syndrome, Familial, 2
SCN11A	OMIM:615548	Neuropathy, Hereditary Sensory and Autonomic, Type VII
SCN11A	OMIM:615552	Episodic Pain Syndrome, Familial, 3
SCN9A	OMIM:133020	Erythermalgia, Primary
SCN9A	OMIM:167400	Paroxysmal Extreme Pain Disorder
SCN9A	OMIM:201300	Neuropathy, Hereditary Sensory and Autonomic, Type IIA
SCN9A	OMIM:243000	Indifference to Pain, Congenital, Autosomal Recessive
SCN9A	OMIM:607208	Epileptic Encephalopathy, Early Infantile, 6
SCN9A	OMIM:613863	Generalized Epilepsy with Febrile Seizures Plus, Type 7
SLC9A9	OMIM:613410	Autism, Susceptibility to, 16
TRPA1	OMIM:615040	Episodic Pain Syndrome, Familial, 1

## Sheet: 30_Neuronal general
Gene	OMIM	Disease
GABRB3	OMIM:612269	Epilepsy, Childhood Absence, Susceptibility to, 5
GRIA3	OMIM:300699	Mental Retardation, X-Linked, Syndromic, Wu Type
GRIN2B	OMIM:613970	Mental Retardation, Autosomal Dominant 6
GRIN2B	OMIM:616139	Epileptic Encephalopathy, Early Infantile, 27
IL1RAPL1	OMIM:300143	Mental Retardation, X-Linked 21
KCNQ2	OMIM:121200	Seizures, Benign Familial Neonatal, 1
KCNQ2	OMIM:613720	Epileptic Encephalopathy, Early Infantile, 7
LGI1	OMIM:600512	Epilepsy, Familial Temporal Lobe, 1
MBD5	OMIM:156200	Mental Retardation, Autosomal Dominant 1
MYT1L	OMIM:616521	Mental Retardation, Autosomal Dominant 39
PCLO	OMIM:608027	Pontocerebellar Hypoplasia, Type 3
TUSC3	OMIM:611093	Mental Retardation, Autosomal Recessive 7

## Sheet: 35_Oligodendrocytes
Gene	OMIM	Disease
GJC2	OMIM:608804	Leukodystrophy, Hypomyelinating, 2
GJC2	OMIM:613206	Spastic Paraplegia 44, Autosomal Recessive
GJC2	OMIM:613480	Lymphedema, Hereditary, Ic
ICK	OMIM:612651	Endocrine-Cerebroosteodysplasia
PLEKHA1	OMIM:603075	Macular Degeneration, Age-Related, 1

## Sheet: 37_Neuronal cerebellum
Gene	OMIM	Disease
ALS2	OMIM:205100	Amyotrophic Lateral Sclerosis 2, Juvenile
ALS2	OMIM:606353	Primary Lateral Sclerosis, Juvenile
ALS2	OMIM:607225	Spastic Paralysis, Infantile-Onset Ascending
GRID2	OMIM:616204	Spinocerebellar Ataxia, Autosomal Recessive 18
NEUROD1	OMIM:125853	Diabetes Mellitus, Noninsulin-Dependent
NEUROD1	OMIM:606394	Maturity-Onset Diabetes of the Young, Type 6
PDE4D	OMIM:606799	Stroke, Susceptibility to, 1
PDE4D	OMIM:614613	Acrodysostosis 2 with or without Hormone Resistance
PPP1R17	OMIM:143890	Hypercholesterolemia, Familial
ZIC1	OMIM:616602	Craniosynostosis 6

## Sheet: 42_Neuronal NC & DS
Gene	OMIM	Disease
ADCY5	OMIM:606703	Dyskinesia, Familial, with Facial Myokymia
CYLD	OMIM:132700	Cylindromatosis, Familial
CYLD	OMIM:601606	Trichoepithelioma, Multiple Familial, 1
CYLD	OMIM:605041	Brooke-Spiegler Syndrome
NEK2	OMIM:615565	Retinitis Pigmentosa 67
RARB	OMIM:615524	Microphthalmia, Syndromic 12
RGS9	OMIM:608415	Prolonged Electroretinal Response Suppression

## Sheet: 45_Neuronal neurons
Gene	OMIM	Disease
APCDD1	OMIM:605389	Hypotrichosis 1
EDN1	OMIM:612798	Question Mark Ears, Isolated
EDN1	OMIM:615706	Auriculocondylar Syndrome 3
NODAL	OMIM:270100	Heterotaxy, Visceral, 5, Autosomal
NOS3	OMIM:104300	Alzheimer Disease
NOS3	OMIM:145500	Hypertension, Essential
NOS3	OMIM:163729	Nitric Oxide Synthase 3
NOS3	OMIM:189800	Preeclampsia/Eclampsia 1
NOS3	OMIM:601367	Stroke, Ischemic
PLAT	OMIM:612348	Thrombophilia, Familial, Due to Decreased Release of Tissue Plasminogen Activator
PLTP	OMIM:172425	Phospholipid Transfer Protein
SLC19A3	OMIM:607483	Thiamine Metabolism Dysfunction Syndrome 2 (biotin- or Thiamine-Responsive Type)
ZIC3	OMIM:306955	Heterotaxy, Visceral, 1, X-Linked
ZIC3	OMIM:314390	Vacterl Association, X-Linked, with or without Hydrocephalus

## Sheet: 48_Neurons & lung
Gene	OMIM	Disease
DLL4	OMIM:616589	Adams-Oliver Syndrome 6
DOCK6	OMIM:614219	Adams-Oliver Syndrome 2
ENG	OMIM:187300	Telangiectasia, Hereditary Hemorrhagic, of Rendu, Osler, and Weber
HMCN1	OMIM:603075	Macular Degeneration, Age-Related, 1
KDR	OMIM:602089	Hemangioma, Capillary Infantile
PDGFRB	OMIM:131440	Myeloproliferative Disorder, Chronic, with Eosinophilia
PDGFRB	OMIM:213600	Basal Ganglia Calcification, Idiopathic, 1
PDGFRB	OMIM:228550	Myofibromatosis, Infantile, 1
PDGFRB	OMIM:601812	Premature Aging Syndrome, Penttinen Type
PDGFRB	OMIM:615007	Basal Ganglia Calcification, Idiopathic, 4
PDGFRB	OMIM:616592	Kosaki Overgrowth Syndrome
TEK	OMIM:600195	Venous Malformations, Multiple Cutaneous and Mucosal

## Sheet: 53_Neuronal general
Gene	OMIM	Disease
ADCY1	OMIM:610154	Deafness, Autosomal Recessive 44
ATP2B2	OMIM:601386	Deafness, Autosomal Recessive 12
CACNB4	OMIM:607682	Epilepsy, Idiopathic Generalized, Susceptibility to, 9
CACNB4	OMIM:613855	Episodic Ataxia, Type 5
GABRA1	OMIM:611136	Epilepsy, Idiopathic Generalized, Susceptibility to, 13
GABRA1	OMIM:615744	Epileptic Encephalopathy, Early Infantile, 19
PRKCG	OMIM:605361	Spinocerebellar Ataxia 14
SCN2B	OMIM:615378	Atrial Fibrillation, Familial, 14
SPTBN2	OMIM:600224	Spinocerebellar Ataxia 5
SPTBN2	OMIM:615386	Spinocerebellar Ataxia, Autosomal Recessive 14
ZBTB18	OMIM:612337	Mental Retardation, Autosomal Dominant 22

[truncated: 12 more sheets: 56_Neuronal cerb & other, 59_Neuronal varib levels, 60_Neuronal general, 66_Neuronal DRG, 77_Neuronal general, 85_Microglia, 90_Spinal cord & adult brain, 91_Myelin synthesis, 96_variable_nuc acc and , 99_Neuronal variable, 1_Testis, 14_Mitochondria]
