# Supplementary material for: Analysis of gene expression in the nervous system identifies key genes and novel candidates for health and disease
Source: Neurogenetics. 2017 Feb 11;18(2):81–95. doi: 10.1007/s10048-017-0509-5 (PMC5359387; doi:10.1007/s10048-017-0509-5)
Supplement: Supplementary file 5 — List of knockout mouse and associated phenotypes associated with genes in each of the clusters (XLSX 340 kb) [file 10048_2017_509_MOESM5_ESM.xlsx]

## Sheet: 5_Neuronal general
	Analysis of gene expression in the nervous system identifies key genes and novel candidates for health and disease
	Neurogenetics
	Sarah M Carpanini, Thomas M Wishart, Thomas H Gillingwater, Jean C Manson and Kim M Summers
	Corresponding author: Professor Kim M Summers The Roslin Institute and Royal (Dick) School of Veterinary Studies, University of Edinburgh, Easter Bush, Midlothian, EH25 9RG, UK; kim.summers@roslin.ed.ac.uk
	Abbreviations: hm-homozygous
Genotype symbol	Genotype Background	Genotype Primary Identifier	Genotype Zygosity	Ontology Annotation						MP term	p-value (Bonferroni 0.05)	Genotype	MP Ontology Term
Ank2<tm1Bnt>/Ank2<tm1Bnt>	involves: 129	MGI:5431705	hm	nervous system phenotype						abnormal synaptic transmission	3.52893e-26	MGI:2175047,MGI:2175049,MGI:2179734,MGI:2180206,MGI:2180498,MGI:2181761,MGI:2181801,MGI:2652947,MGI:3032586,MGI:3032587,MGI:3032601,MGI:3033207,MGI:3041527,MGI:3045985,MGI:3050200,MGI:3050843,MGI:3510961,MGI:3588768,MGI:3589777,MGI:3711699,MGI:3719351,MGI:3759993,MGI:3805109,MGI:3809935,MGI:3828159,MGI:3832395,MGI:3832434,MGI:3835047,MGI:4867727,MGI:5318976,MGI:5562420,MGI:5604725,MGI:5605504,MGI…	MP:0003635
Ank2<tm1Bnt>/Ank2<tm1Bnt>	involves: 129X1/SvJ * C57BL/6	MGI:2181775	hm	abnormal anterior corticospinal tract morphology						abnormal nervous system physiology	2.55765e-24	MGI:2175047,MGI:2175049,MGI:2179734,MGI:2180206,MGI:2180320,MGI:2180498,MGI:2181761,MGI:2181801,MGI:2652947,MGI:2655446,MGI:2676370,MGI:3032586,MGI:3032587,MGI:3032601,MGI:3033207,MGI:3041527,MGI:3045985,MGI:3050200,MGI:3050843,MGI:3053922,MGI:3510961,MGI:3580018,MGI:3580019,MGI:3588768,MGI:3589777,MGI:3693127,MGI:3711314,MGI:3711699,MGI:3718040,MGI:3718400,MGI:3719351,MGI:3719398,MGI:3719399,MGI…	MP:0003633
Ank2<tm1Bnt>/Ank2<tm1Bnt>	involves: 129X1/SvJ * C57BL/6	MGI:2181775	hm	abnormal axon morphology						abnormal CNS synaptic transmission	1.48965e-23	MGI:2175047,MGI:2175049,MGI:2179734,MGI:2180206,MGI:2180498,MGI:2181761,MGI:2181801,MGI:2652947,MGI:3032587,MGI:3032601,MGI:3041527,MGI:3045985,MGI:3050200,MGI:3510961,MGI:3588768,MGI:3589777,MGI:3711699,MGI:3719351,MGI:3759993,MGI:3805109,MGI:3809935,MGI:3828159,MGI:3832395,MGI:3832434,MGI:3835047,MGI:4867727,MGI:5318976,MGI:5562420,MGI:5604725,MGI:5605504,MGI:5689346,MGI:5691569,MGI:5694245	MP:0002206
Ank2<tm1Bnt>/Ank2<tm1Bnt>	involves: 129X1/SvJ * C57BL/6	MGI:2181775	hm	abnormal lateral corticospinal tract morphology						nervous system phenotype	1.81309e-17	MGI:2174969,MGI:2175047,MGI:2175049,MGI:2175187,MGI:2177609,MGI:2179734,MGI:2180206,MGI:2180320,MGI:2180498,MGI:2181761,MGI:2181775,MGI:2181801,MGI:2449968,MGI:2652947,MGI:2655446,MGI:2676370,MGI:3032586,MGI:3032587,MGI:3032601,MGI:3033207,MGI:3040875,MGI:3040879,MGI:3041527,MGI:3045985,MGI:3050200,MGI:3050843,MGI:3053922,MGI:3510961,MGI:3526652,MGI:3580018,MGI:3580019,MGI:3583002,MGI:3588768,MGI…	MP:0003631
Ank2<tm1Bnt>/Ank2<tm1Bnt>	involves: 129X1/SvJ * C57BL/6	MGI:2181775	hm	abnormal locomotor behavior						abnormal behavior	9.17903e-14	MGI:2175047,MGI:2175049,MGI:2175187,MGI:2177609,MGI:2180206,MGI:2180320,MGI:2181761,MGI:2181775,MGI:2181801,MGI:2388814,MGI:2449968,MGI:2652947,MGI:2669541,MGI:2676370,MGI:3032586,MGI:3032587,MGI:3032601,MGI:3040879,MGI:3041528,MGI:3043296,MGI:3045985,MGI:3050200,MGI:3050843,MGI:3053922,MGI:3510961,MGI:3522085,MGI:3580018,MGI:3580019,MGI:3588768,MGI:3626059,MGI:3697816,MGI:3711699,MGI:3718040,MGI…	MP:0004924
Ank2<tm1Bnt>/Ank2<tm1Bnt>	involves: 129X1/SvJ * C57BL/6	MGI:2181775	hm	complete postnatal lethality						behavior/neurological phenotype	9.17903e-14	MGI:2175047,MGI:2175049,MGI:2175187,MGI:2177609,MGI:2180206,MGI:2180320,MGI:2181761,MGI:2181775,MGI:2181801,MGI:2388814,MGI:2449968,MGI:2652947,MGI:2669541,MGI:2670770,MGI:2676370,MGI:3032586,MGI:3032587,MGI:3032601,MGI:3038224,MGI:3040879,MGI:3041527,MGI:3041528,MGI:3043296,MGI:3045985,MGI:3050200,MGI:3050843,MGI:3053922,MGI:3510961,MGI:3522085,MGI:3580018,MGI:3580019,MGI:3588768,MGI:3626059,MGI…	MP:0005386
Ank2<tm1Bnt>/Ank2<tm1Bnt>	involves: 129X1/SvJ * C57BL/6	MGI:2181775	hm	decreased body weight						abnormal neuron physiology	1.84446e-10	MGI:2652947,MGI:2655446,MGI:3032587,MGI:3053922,MGI:3580018,MGI:3580019,MGI:3693127,MGI:3711314,MGI:3711699,MGI:3719351,MGI:3719398,MGI:3719399,MGI:3798854,MGI:3809935,MGI:3832395,MGI:4440493,MGI:4880006,MGI:5294552,MGI:5440728,MGI:5605504,MGI:5691569	MP:0004811
Ank2<tm1Bnt>/Ank2<tm1Bnt>	involves: 129X1/SvJ * C57BL/6	MGI:2181775	hm	decreased brain internal capsule size						abnormal synaptic depression	5.78557e-10	MGI:2179734,MGI:2181801,MGI:2652947,MGI:3032587,MGI:3032601,MGI:3041527,MGI:3045985,MGI:3050200,MGI:3828159,MGI:5562420,MGI:5691569	MP:0002915
Ank2<tm1Bnt>/Ank2<tm1Bnt>	involves: 129X1/SvJ * C57BL/6	MGI:2181775	hm	decreased corpus callosum size						abnormal neuron morphology	1.18735e-07	MGI:2174969,MGI:2175187,MGI:2181775,MGI:2652947,MGI:2676370,MGI:3032587,MGI:3033207,MGI:3040879,MGI:3045985,MGI:3050843,MGI:3510961,MGI:3583002,MGI:3612893,MGI:3612894,MGI:3612896,MGI:3618306,MGI:3628588,MGI:3629389,MGI:3711314,MGI:3711699,MGI:3713734,MGI:3718400,MGI:3721520,MGI:3817235,MGI:3832395,MGI:4440493,MGI:4867727,MGI:5294552,MGI:5605504,MGI:5617024,MGI:5688361,MGI:5689346,MGI:5691569,MGI…	MP:0002882
Ank2<tm1Bnt>/Ank2<tm1Bnt>	involves: 129X1/SvJ * C57BL/6	MGI:2181775	hm	disorganized secondary lens fibers						abnormal glutamate-mediated receptor currents	1.21002e-07	MGI:2175047,MGI:2175049,MGI:3588768,MGI:3759993,MGI:3805109,MGI:3809935,MGI:4867727,MGI:5605504,MGI:5689346	MP:0002886
Ank2<tm1Bnt>/Ank2<tm1Bnt>	involves: 129X1/SvJ * C57BL/6	MGI:2181775	hm	enlarged lateral ventricles						abnormal synaptic vesicle recycling	1.32878e-07	MGI:3711699,MGI:3719351,MGI:3832395,MGI:4440493,MGI:5605504,MGI:5691569	MP:0004770
Ank2<tm1Bnt>/Ank2<tm1Bnt>	involves: 129X1/SvJ * C57BL/6	MGI:2181775	hm	impaired balance						seizures	1.5764e-07	MGI:2180206,MGI:2180320,MGI:2181801,MGI:2652947,MGI:2676370,MGI:3032586,MGI:3032587,MGI:3032601,MGI:3045985,MGI:3510961,MGI:3580018,MGI:3718040,MGI:3718400,MGI:3798854,MGI:3832395,MGI:4880006,MGI:5691569	MP:0002064
Ank2<tm1Bnt>/Ank2<tm1Bnt>	involves: 129X1/SvJ * C57BL/6	MGI:2181775	hm	optic nerve degeneration						abnormal synaptic vesicle morphology	1.03009e-06	MGI:2652947,MGI:3045985,MGI:3510961,MGI:3711699,MGI:4440493,MGI:5605504,MGI:5691569	MP:0004769
Ank2<tm1Bnt>/Ank2<tm1Bnt>	involves: 129X1/SvJ * C57BL/6	MGI:2181775	hm	partial neonatal lethality						increased synaptic depression	3.32543e-06	MGI:2179734,MGI:2181801,MGI:3032587,MGI:3032601,MGI:3050200	MP:0002916
Ap3m2<tm1Ohno>/Ap3m2<tm1Ohno>	involves: 129P2/OlaHsd * C57BL/6	MGI:3510961	hm	abnormal hippocampus morphology						abnormal miniature excitatory postsynaptic currents	5.47363e-06	MGI:2181761,MGI:3045985,MGI:3711699,MGI:3832395,MGI:4867727,MGI:5318976,MGI:5605504,MGI:5691569	MP:0004753
Ap3m2<tm1Ohno>/Ap3m2<tm1Ohno>	involves: 129P2/OlaHsd * C57BL/6	MGI:3510961	hm	abnormal kindling response						abnormal synaptic vesicle number	2.07409e-05	MGI:2652947,MGI:3045985,MGI:3711699,MGI:4440493,MGI:5605504,MGI:5691569	MP:0004792
Ap3m2<tm1Ohno>/Ap3m2<tm1Ohno>	involves: 129P2/OlaHsd * C57BL/6	MGI:3510961	hm	abnormal nervous system electrophysiology						abnormal learning/memory/conditioning	0.0001548	MGI:2669541,MGI:3050200,MGI:3522085,MGI:3697816,MGI:3798854,MGI:3805109,MGI:3828159,MGI:4867727,MGI:4888960,MGI:5287889,MGI:5318976,MGI:5517482,MGI:5517484,MGI:5562420,MGI:5604725,MGI:5699609	MP:0002063
Ap3m2<tm1Ohno>/Ap3m2<tm1Ohno>	involves: 129P2/OlaHsd * C57BL/6	MGI:3510961	hm	abnormal synaptic vesicle morphology						abnormal synaptic vesicle clustering	0.000320741	MGI:3032587,MGI:3719351,MGI:3719398,MGI:3719399	MP:0004793
Ap3m2<tm1Ohno>/Ap3m2<tm1Ohno>	involves: 129P2/OlaHsd * C57BL/6	MGI:3510961	hm	decreased neurotransmitter release						complete postnatal lethality	0.000719491	MGI:2177609,MGI:2180206,MGI:2180320,MGI:2181775,MGI:2181801,MGI:2676370,MGI:3040875,MGI:3040879,MGI:3582973,MGI:3612893,MGI:3612894,MGI:3693127,MGI:3711699,MGI:5605504	MP:0011085
Ap3m2<tm1Ohno>/Ap3m2<tm1Ohno>	involves: 129P2/OlaHsd * C57BL/6	MGI:3510961	hm	enhanced long term potentiation						abnormal nervous system morphology	0.000762522	MGI:2174969,MGI:2175049,MGI:2175187,MGI:2181761,MGI:2181775,MGI:2652947,MGI:2655446,MGI:2676370,MGI:3032587,MGI:3033207,MGI:3040875,MGI:3040879,MGI:3045985,MGI:3050843,MGI:3510961,MGI:3580019,MGI:3583002,MGI:3588768,MGI:3612893,MGI:3612894,MGI:3612896,MGI:3618306,MGI:3628588,MGI:3629389,MGI:3693127,MGI:3711314,MGI:3711699,MGI:3713734,MGI:3718400,MGI:3719398,MGI:3719399,MGI:3721520,MGI:3798854,MGI…	MP:0003632
Ap3m2<tm1Ohno>/Ap3m2<tm1Ohno>	involves: 129P2/OlaHsd * C57BL/6	MGI:3510961	hm	increased susceptibility to pharmacologically induced seizures						abnormal NMDA-mediated synaptic currents	0.00245263	MGI:2175047,MGI:2175049,MGI:3759993,MGI:4867727,MGI:5689346	MP:0002888
Ap3m2<tm1Ohno>/Ap3m2<tm1Ohno>	involves: 129P2/OlaHsd * C57BL/6	MGI:3510961	hm	nonconvulsive seizures						abnormal synapse morphology	0.00684491	MGI:2652947,MGI:3045985,MGI:3050843,MGI:3510961,MGI:3711699,MGI:4440493,MGI:5605504,MGI:5691569	MP:0009538
Ap3m2<tm1Ohno>/Ap3m2<tm1Ohno>	involves: 129P2/OlaHsd * C57BL/6	MGI:3510961	hm	seizures						abnormal motor coordination/ balance	0.00686977	MGI:2175049,MGI:2177609,MGI:2181775,MGI:2181801,MGI:2652947,MGI:2676370,MGI:3040879,MGI:3043296,MGI:3050200,MGI:3050843,MGI:3053922,MGI:3580019,MGI:3832395,MGI:4867727,MGI:4880006,MGI:5318976,MGI:5662459,MGI:5699609	MP:0001516
Apbb1<tm1Her>/Apbb1<tm1Her>	involves: 129S6/SvEvTac * C57BL/6	MGI:3622752	hm	no abnormal phenotype detected						abnormal sensory neuron innervation pattern	0.00687834	MGI:2175187,MGI:3612893,MGI:3612894,MGI:3612896,MGI:3711314,MGI:3713734,MGI:5617024	MP:0000968
Apbb1<tm1Quhu>/Apbb1<tm1Quhu>	involves: 129S1/Sv * 129X1/SvJ * C57BL/6	MGI:3522085	hm	abnormal passive avoidance behavior						abnormal emotion/affect behavior	0.0145999	MGI:2669541,MGI:3588768,MGI:3798854,MGI:3805109,MGI:3834579,MGI:4867727,MGI:4888959,MGI:4888960,MGI:5318976,MGI:5517482,MGI:5517484,MGI:5563527,MGI:5699609	MP:0002572
Apbb1<tm1Quhu>/Apbb1<tm1Quhu>	involves: 129S1/Sv * 129X1/SvJ * C57BL/6	MGI:3522085	hm	abnormal spatial learning						abnormal motor capabilities/coordination/movement	0.0194709	MGI:2175049,MGI:2175187,MGI:2177609,MGI:2181761,MGI:2181775,MGI:2181801,MGI:2449968,MGI:2652947,MGI:2669541,MGI:2676370,MGI:3040879,MGI:3043296,MGI:3050200,MGI:3050843,MGI:3053922,MGI:3580019,MGI:3711699,MGI:3805109,MGI:3832395,MGI:3832434,MGI:3834579,MGI:4867727,MGI:4880006,MGI:4888960,MGI:5318976,MGI:5450637,MGI:5450647,MGI:5587060,MGI:5631126,MGI:5662459,MGI:5699609	MP:0002066
Apbb1<tm1Trus>/Apbb1<tm1Trus>	involves: 129S1/Sv * 129X1/SvJ * C57BL/6	MGI:3701600	hm	abnormal cell physiology						abnormal long term potentiation	0.0267528	MGI:3041527,MGI:3510961,MGI:3589777,MGI:3805109,MGI:5318976,MGI:5604725,MGI:5689346,MGI:5694245	MP:0002207
Apbb1<tm1Trus>/Apbb1<tm1Trus>	involves: 129S1/Sv * 129X1/SvJ * C57BL/6	MGI:3701600	hm	increased cellular sensitivity to ionizing radiation						abnormal CNS synapse formation	0.0278683	MGI:3032587,MGI:3045985,MGI:3719398,MGI:3719399	MP:0004996
Arhgef7<tm1a(EUCOMM)Wtsi>/Arhgef7<tm1a(EUCOMM)Wtsi>	C57BL/6N-Arhgef7<tm1a(EUCOMM)Wtsi>/Wtsi	MGI:5630861	hm	complete preweaning lethality						ataxia	0.0421765	MGI:2175049,MGI:2181801,MGI:2652947,MGI:2676370,MGI:3043296,MGI:3050200,MGI:3050843,MGI:3053922,MGI:3832395,MGI:4880006	MP:0001393
Atp1a3<tm1.1Kwk>/Atp1a3<tm1.1Kwk>	B6JJcl.Cg-Atp1a3<tm1.1Kwk>	MGI:5572812	hm	abnormal respiratory function
Atp1a3<tm1.1Kwk>/Atp1a3<tm1.1Kwk>	B6JJcl.Cg-Atp1a3<tm1.1Kwk>	MGI:5572812	hm	complete neonatal lethality
Atp1a3<tm1Ling>/Atp1a3<tm1Ling>	involves: 129 * Black Swiss	MGI:3697484	hm	complete neonatal lethality
Atp6v1g2<tm1.1Ywd>/Atp6v1g2<tm1.1Ywd>	involves: 129S1/Sv * 129X1/SvJ * C57BL/6 * FVB/N	MGI:5661473	hm	mortality/aging
Brinp1<tm1Imts>/Brinp1<tm1Imts>	B6J.Cg-Brinp1<tm1Imts>	MGI:5699609	hm	abnormal brain interneuron morphology
Brinp1<tm1Imts>/Brinp1<tm1Imts>	B6J.Cg-Brinp1<tm1Imts>	MGI:5699609	hm	abnormal dentate gyrus morphology
Brinp1<tm1Imts>/Brinp1<tm1Imts>	B6J.Cg-Brinp1<tm1Imts>	MGI:5699609	hm	abnormal hippocampus CA1 region morphology
Brinp1<tm1Imts>/Brinp1<tm1Imts>	B6J.Cg-Brinp1<tm1Imts>	MGI:5699609	hm	abnormal social investigation
Brinp1<tm1Imts>/Brinp1<tm1Imts>	B6J.Cg-Brinp1<tm1Imts>	MGI:5699609	hm	abnormal spatial working memory
Brinp1<tm1Imts>/Brinp1<tm1Imts>	B6J.Cg-Brinp1<tm1Imts>	MGI:5699609	hm	behavior/neurological phenotype
Brinp1<tm1Imts>/Brinp1<tm1Imts>	B6J.Cg-Brinp1<tm1Imts>	MGI:5699609	hm	decreased anxiety-related response
Brinp1<tm1Imts>/Brinp1<tm1Imts>	B6J.Cg-Brinp1<tm1Imts>	MGI:5699609	hm	decreased body weight
Brinp1<tm1Imts>/Brinp1<tm1Imts>	B6J.Cg-Brinp1<tm1Imts>	MGI:5699609	hm	homeostasis/metabolism phenotype
Brinp1<tm1Imts>/Brinp1<tm1Imts>	B6J.Cg-Brinp1<tm1Imts>	MGI:5699609	hm	hyperactivity
Brinp1<tm1Imts>/Brinp1<tm1Imts>	B6J.Cg-Brinp1<tm1Imts>	MGI:5699609	hm	impaired coordination
Brinp1<tm1Imts>/Brinp1<tm1Imts>	B6J.Cg-Brinp1<tm1Imts>	MGI:5699609	hm	impaired neuron differentiation
Brinp1<tm1Imts>/Brinp1<tm1Imts>	B6J.Cg-Brinp1<tm1Imts>	MGI:5699609	hm	increased neuronal precursor cell number
Brinp1<tm1Imts>/Brinp1<tm1Imts>	B6J.Cg-Brinp1<tm1Imts>	MGI:5699609	hm	skeleton phenotype
Brsk2<tm1Jrs>/Brsk2<tm1Jrs>	involves: 129S1/Sv * 129X1/SvJ * C57BL/6	MGI:3575534	hm	no abnormal phenotype detected
Bsn<tm1Gund>/Bsn<tm1Gund>	Not Specified	MGI:2652947	hm	abnormal auditory brainstem response
Bsn<tm1Gund>/Bsn<tm1Gund>	Not Specified	MGI:2652947	hm	abnormal brain wave pattern
Bsn<tm1Gund>/Bsn<tm1Gund>	Not Specified	MGI:2652947	hm	abnormal CNS synaptic transmission
Bsn<tm1Gund>/Bsn<tm1Gund>	Not Specified	MGI:2652947	hm	abnormal cochlear inner hair cell physiology
Bsn<tm1Gund>/Bsn<tm1Gund>	Not Specified	MGI:2652947	hm	abnormal inner hair cell synaptic ribbon morphology
Bsn<tm1Gund>/Bsn<tm1Gund>	Not Specified	MGI:2652947	hm	abnormal retinal rod cell morphology
Bsn<tm1Gund>/Bsn<tm1Gund>	Not Specified	MGI:2652947	hm	abnormal somatic nervous system physiology
Bsn<tm1Gund>/Bsn<tm1Gund>	Not Specified	MGI:2652947	hm	abnormal synaptic transmission
Bsn<tm1Gund>/Bsn<tm1Gund>	Not Specified	MGI:2652947	hm	abnormal synaptic vesicle number
Bsn<tm1Gund>/Bsn<tm1Gund>	Not Specified	MGI:2652947	hm	absent active-zone-anchored inner hair cell synaptic ribbon
Bsn<tm1Gund>/Bsn<tm1Gund>	Not Specified	MGI:2652947	hm	ataxia
Bsn<tm1Gund>/Bsn<tm1Gund>	Not Specified	MGI:2652947	hm	clonic seizures
Bsn<tm1Gund>/Bsn<tm1Gund>	Not Specified	MGI:2652947	hm	convulsive seizures
Bsn<tm1Gund>/Bsn<tm1Gund>	Not Specified	MGI:2652947	hm	decreased cochlear nerve compound action potential
Bsn<tm1Gund>/Bsn<tm1Gund>	Not Specified	MGI:2652947	hm	decreased synaptic depression
Bsn<tm1Gund>/Bsn<tm1Gund>	Not Specified	MGI:2652947	hm	impaired hearing
Bsn<tm1Gund>/Bsn<tm1Gund>	Not Specified	MGI:2652947	hm	impaired righting response
Bsn<tm1Gund>/Bsn<tm1Gund>	Not Specified	MGI:2652947	hm	increased susceptibility to pharmacologically induced seizures
Bsn<tm1Gund>/Bsn<tm1Gund>	Not Specified	MGI:2652947	hm	myoclonus
Bsn<tm1Gund>/Bsn<tm1Gund>	Not Specified	MGI:2652947	hm	premature death
Camkk1<tm1Tch>/Camkk1<tm1Tch>	involves: 129X1/SvJ * C57BL/6	MGI:3697816	hm	abnormal contextual conditioning behavior
Camkk1<tm1Tch>/Camkk1<tm1Tch>	involves: 129X1/SvJ * C57BL/6	MGI:3697816	hm	nervous system phenotype
Camkk1<tm1Tch>/Camkk1<tm1Tch>	involves: 129X1/SvJ * C57BL/6	MGI:3697816	hm	reproductive system phenotype
Clstn1<tm1.1Uge>/Clstn1<tm1.1Uge>	involves: C57BL/6 * C57BL/6NTac	MGI:5689346	hm	abnormal CNS synaptic transmission
Clstn1<tm1.1Uge>/Clstn1<tm1.1Uge>	involves: C57BL/6 * C57BL/6NTac	MGI:5689346	hm	abnormal dendrite morphology
Clstn1<tm1.1Uge>/Clstn1<tm1.1Uge>	involves: C57BL/6 * C57BL/6NTac	MGI:5689346	hm	abnormal dendritic spine morphology
Clstn1<tm1.1Uge>/Clstn1<tm1.1Uge>	involves: C57BL/6 * C57BL/6NTac	MGI:5689346	hm	abnormal excitatory postsynaptic currents
Clstn1<tm1.1Uge>/Clstn1<tm1.1Uge>	involves: C57BL/6 * C57BL/6NTac	MGI:5689346	hm	abnormal excitatory postsynaptic potential
Clstn1<tm1.1Uge>/Clstn1<tm1.1Uge>	involves: C57BL/6 * C57BL/6NTac	MGI:5689346	hm	abnormal glutamate-mediated receptor currents
Clstn1<tm1.1Uge>/Clstn1<tm1.1Uge>	involves: C57BL/6 * C57BL/6NTac	MGI:5689346	hm	abnormal NMDA-mediated synaptic currents
Clstn1<tm1.1Uge>/Clstn1<tm1.1Uge>	involves: C57BL/6 * C57BL/6NTac	MGI:5689346	hm	behavior/neurological phenotype
Clstn1<tm1.1Uge>/Clstn1<tm1.1Uge>	involves: C57BL/6 * C57BL/6NTac	MGI:5689346	hm	enhanced long term potentiation
Clstn1<tm1.1Uge>/Clstn1<tm1.1Uge>	involves: C57BL/6 * C57BL/6NTac	MGI:5689346	hm	nervous system phenotype
Clstn1<tm1.1Uge>/Clstn1<tm1.1Uge>	involves: C57BL/6 * C57BL/6NTac	MGI:5689346	hm	prolonged excitatory postsynaptic current decay time
Dclk1<tm1.1Jgg>/Dclk1<tm1.1Jgg>	involves: 129S1/Sv * 129X1/SvJ * Black Swiss * C57BL/6	MGI:3618306	hm	abnormal axon guidance
Dclk1<tm1.1Jgg>/Dclk1<tm1.1Jgg>	involves: 129S1/Sv * 129X1/SvJ * Black Swiss * C57BL/6	MGI:3618306	hm	abnormal corpus callosum morphology
Dclk1<tm1.1Jgg>/Dclk1<tm1.1Jgg>	involves: 129S1/Sv * 129X1/SvJ * Black Swiss * C57BL/6	MGI:3618306	hm	absent corpus callosum
Dclk1<tm1.1Jgg>/Dclk1<tm1.1Jgg>	involves: 129S1/Sv * 129X1/SvJ * Black Swiss * C57BL/6	MGI:3618306	hm	absent hippocampal commissure
Dclk1<tm1Caw>/Dclk1<tm1Caw>	involves: 129S6/SvEvTac * 129X1/SvJ * C57BL/6J	MGI:3628588	hm	abnormal axon morphology
Dclk1<tm1Caw>/Dclk1<tm1Caw>	involves: 129S6/SvEvTac * 129X1/SvJ * C57BL/6J	MGI:3628588	hm	abnormal neuron morphology
Dnajc5<tm1Sud>/Dnajc5<tm1Sud>	involves: 129S6/SvEvTac	MGI:3050843	hm	abnormal endplate potential
Dnajc5<tm1Sud>/Dnajc5<tm1Sud>	involves: 129S6/SvEvTac	MGI:3050843	hm	abnormal eye electrophysiology
Dnajc5<tm1Sud>/Dnajc5<tm1Sud>	involves: 129S6/SvEvTac	MGI:3050843	hm	abnormal grip strength
Dnajc5<tm1Sud>/Dnajc5<tm1Sud>	involves: 129S6/SvEvTac	MGI:3050843	hm	abnormal locomotor behavior
Dnajc5<tm1Sud>/Dnajc5<tm1Sud>	involves: 129S6/SvEvTac	MGI:3050843	hm	abnormal motor coordination/ balance
Dnajc5<tm1Sud>/Dnajc5<tm1Sud>	involves: 129S6/SvEvTac	MGI:3050843	hm	abnormal neuromuscular synapse morphology
Dnajc5<tm1Sud>/Dnajc5<tm1Sud>	involves: 129S6/SvEvTac	MGI:3050843	hm	abnormal otoacoustic response
Dnajc5<tm1Sud>/Dnajc5<tm1Sud>	involves: 129S6/SvEvTac	MGI:3050843	hm	abnormal PNS synaptic transmission
Dnajc5<tm1Sud>/Dnajc5<tm1Sud>	involves: 129S6/SvEvTac	MGI:3050843	hm	abnormal posture
Dnajc5<tm1Sud>/Dnajc5<tm1Sud>	involves: 129S6/SvEvTac	MGI:3050843	hm	abnormal retinal outer plexiform layer morphology
Dnajc5<tm1Sud>/Dnajc5<tm1Sud>	involves: 129S6/SvEvTac	MGI:3050843	hm	abnormal vision
Dnajc5<tm1Sud>/Dnajc5<tm1Sud>	involves: 129S6/SvEvTac	MGI:3050843	hm	ataxia
Dnajc5<tm1Sud>/Dnajc5<tm1Sud>	involves: 129S6/SvEvTac	MGI:3050843	hm	blindness
Dnajc5<tm1Sud>/Dnajc5<tm1Sud>	involves: 129S6/SvEvTac	MGI:3050843	hm	conductive hearing impairment
Dnajc5<tm1Sud>/Dnajc5<tm1Sud>	involves: 129S6/SvEvTac	MGI:3050843	hm	cryptorchism
Dnajc5<tm1Sud>/Dnajc5<tm1Sud>	involves: 129S6/SvEvTac	MGI:3050843	hm	decreased body size
Dnajc5<tm1Sud>/Dnajc5<tm1Sud>	involves: 129S6/SvEvTac	MGI:3050843	hm	decreased grip strength
Dnajc5<tm1Sud>/Dnajc5<tm1Sud>	involves: 129S6/SvEvTac	MGI:3050843	hm	decreased skeletal muscle mass
Dnajc5<tm1Sud>/Dnajc5<tm1Sud>	involves: 129S6/SvEvTac	MGI:3050843	hm	decreased startle reflex
Dnajc5<tm1Sud>/Dnajc5<tm1Sud>	involves: 129S6/SvEvTac	MGI:3050843	hm	gliosis
Dnajc5<tm1Sud>/Dnajc5<tm1Sud>	involves: 129S6/SvEvTac	MGI:3050843	hm	hearing/vestibular/ear phenotype
Dnajc5<tm1Sud>/Dnajc5<tm1Sud>	involves: 129S6/SvEvTac	MGI:3050843	hm	hypoactivity
Dnajc5<tm1Sud>/Dnajc5<tm1Sud>	involves: 129S6/SvEvTac	MGI:3050843	hm	impaired coordination
Dnajc5<tm1Sud>/Dnajc5<tm1Sud>	involves: 129S6/SvEvTac	MGI:3050843	hm	impaired hearing
Dnajc5<tm1Sud>/Dnajc5<tm1Sud>	involves: 129S6/SvEvTac	MGI:3050843	hm	impaired righting response
Dnajc5<tm1Sud>/Dnajc5<tm1Sud>	involves: 129S6/SvEvTac	MGI:3050843	hm	lethargy
Dnajc5<tm1Sud>/Dnajc5<tm1Sud>	involves: 129S6/SvEvTac	MGI:3050843	hm	limb grasping
Dnajc5<tm1Sud>/Dnajc5<tm1Sud>	involves: 129S6/SvEvTac	MGI:3050843	hm	postnatal growth retardation
Dnajc5<tm1Sud>/Dnajc5<tm1Sud>	involves: 129S6/SvEvTac	MGI:3050843	hm	premature death
Dnajc5<tm1Sud>/Dnajc5<tm1Sud>	involves: 129S6/SvEvTac	MGI:3050843	hm	progressive muscle weakness
Dnajc5<tm1Sud>/Dnajc5<tm1Sud>	involves: 129S6/SvEvTac	MGI:3050843	hm	retinal photoreceptor degeneration
Dnajc5<tm1Sud>/Dnajc5<tm1Sud>	involves: 129S6/SvEvTac	MGI:3050843	hm	thin retinal outer nuclear layer
Dnajc5<tm1Sud>/Dnajc5<tm1Sud>	involves: 129S6/SvEvTac	MGI:3050843	hm	weight loss
Dnajc6<tm1Legr>/Dnajc6<tm1Legr>	B6.129-Dnajc6<tm1Legr>	MGI:4440493	hm	abnormal synaptic vesicle number
Dnajc6<tm1Legr>/Dnajc6<tm1Legr>	B6.129-Dnajc6<tm1Legr>	MGI:4440493	hm	abnormal synaptic vesicle recycling
Dnajc6<tm1Legr>/Dnajc6<tm1Legr>	B6.129-Dnajc6<tm1Legr>	MGI:4440493	hm	decreased birth weight
Dnajc6<tm1Legr>/Dnajc6<tm1Legr>	B6.129-Dnajc6<tm1Legr>	MGI:4440493	hm	decreased body weight
Dnajc6<tm1Legr>/Dnajc6<tm1Legr>	B6.129-Dnajc6<tm1Legr>	MGI:4440493	hm	delayed female fertility
Dnajc6<tm1Legr>/Dnajc6<tm1Legr>	B6.129-Dnajc6<tm1Legr>	MGI:4440493	hm	partial postnatal lethality
Dnm1<tm1Pdc>/Dnm1<tm1Pdc>	involves: 129X1/SvJ * C57BL/6	MGI:3711699	hm	abnormal CNS synaptic transmission
Dnm1<tm1Pdc>/Dnm1<tm1Pdc>	involves: 129X1/SvJ * C57BL/6	MGI:3711699	hm	abnormal inhibitory postsynaptic currents
Dnm1<tm1Pdc>/Dnm1<tm1Pdc>	involves: 129X1/SvJ * C57BL/6	MGI:3711699	hm	abnormal miniature excitatory postsynaptic currents
Dnm1<tm1Pdc>/Dnm1<tm1Pdc>	involves: 129X1/SvJ * C57BL/6	MGI:3711699	hm	abnormal motor capabilities/coordination/movement
Dnm1<tm1Pdc>/Dnm1<tm1Pdc>	involves: 129X1/SvJ * C57BL/6	MGI:3711699	hm	abnormal neuron morphology
Dnm1<tm1Pdc>/Dnm1<tm1Pdc>	involves: 129X1/SvJ * C57BL/6	MGI:3711699	hm	abnormal suckling behavior
Dnm1<tm1Pdc>/Dnm1<tm1Pdc>	involves: 129X1/SvJ * C57BL/6	MGI:3711699	hm	abnormal synaptic vesicle morphology
Dnm1<tm1Pdc>/Dnm1<tm1Pdc>	involves: 129X1/SvJ * C57BL/6	MGI:3711699	hm	abnormal synaptic vesicle number
Dnm1<tm1Pdc>/Dnm1<tm1Pdc>	involves: 129X1/SvJ * C57BL/6	MGI:3711699	hm	abnormal synaptic vesicle recycling
Dnm1<tm1Pdc>/Dnm1<tm1Pdc>	involves: 129X1/SvJ * C57BL/6	MGI:3711699	hm	complete postnatal lethality
Epb41l1<tm1.1Aliv>/Epb41l1<tm1.1Aliv>	involves: 129P2/OlaHsd * FVB/N	MGI:3838876	hm	no abnormal phenotype detected
Epm2aip1<Gt(BA0314)Wtsi>/Epm2aip1<Gt(BA0314)Wtsi>	involves: 129P2/OlaHsd * C57BL/6	MGI:5563527	hm	abnormal gluconeogenesis
Epm2aip1<Gt(BA0314)Wtsi>/Epm2aip1<Gt(BA0314)Wtsi>	involves: 129P2/OlaHsd * C57BL/6	MGI:5563527	hm	abnormal glucose homeostasis
Epm2aip1<Gt(BA0314)Wtsi>/Epm2aip1<Gt(BA0314)Wtsi>	involves: 129P2/OlaHsd * C57BL/6	MGI:5563527	hm	abnormal glycogen homeostasis
Epm2aip1<Gt(BA0314)Wtsi>/Epm2aip1<Gt(BA0314)Wtsi>	involves: 129P2/OlaHsd * C57BL/6	MGI:5563527	hm	behavior/neurological phenotype
Epm2aip1<Gt(BA0314)Wtsi>/Epm2aip1<Gt(BA0314)Wtsi>	involves: 129P2/OlaHsd * C57BL/6	MGI:5563527	hm	decreased circulating glucose level
Epm2aip1<Gt(BA0314)Wtsi>/Epm2aip1<Gt(BA0314)Wtsi>	involves: 129P2/OlaHsd * C57BL/6	MGI:5563527	hm	decreased liver glycogen level
Epm2aip1<Gt(BA0314)Wtsi>/Epm2aip1<Gt(BA0314)Wtsi>	involves: 129P2/OlaHsd * C57BL/6	MGI:5563527	hm	decreased susceptibility to age related obesity
Epm2aip1<Gt(BA0314)Wtsi>/Epm2aip1<Gt(BA0314)Wtsi>	involves: 129P2/OlaHsd * C57BL/6	MGI:5563527	hm	hepatic steatosis
Epm2aip1<Gt(BA0314)Wtsi>/Epm2aip1<Gt(BA0314)Wtsi>	involves: 129P2/OlaHsd * C57BL/6	MGI:5563527	hm	improved glucose tolerance
Epm2aip1<Gt(BA0314)Wtsi>/Epm2aip1<Gt(BA0314)Wtsi>	involves: 129P2/OlaHsd * C57BL/6	MGI:5563527	hm	increased anxiety-related response
Epm2aip1<Gt(BA0314)Wtsi>/Epm2aip1<Gt(BA0314)Wtsi>	involves: 129P2/OlaHsd * C57BL/6	MGI:5563527	hm	muscle phenotype
Fbxo41<tm1.1(KOMP)Vlcg>/Fbxo41<tm1.1(KOMP)Vlcg>	C57BL/6N-Fbxo41<tm1.1(KOMP)Vlcg>/Ucd	MGI:5631126	hm	increased startle reflex
Gabrb2<tm1.1Twr>/Gabrb2<tm1.1Twr>	involves: 129S7/SvEvBrd * C57BL/6	MGI:3713734	hm	abnormal auditory brainstem response waveform shape
Gabrb2<tm1.1Twr>/Gabrb2<tm1.1Twr>	involves: 129S7/SvEvBrd * C57BL/6	MGI:3713734	hm	abnormal cochlea morphology
Gabrb2<tm1.1Twr>/Gabrb2<tm1.1Twr>	involves: 129S7/SvEvBrd * C57BL/6	MGI:3713734	hm	abnormal cochlear OHC efferent innervation pattern
Gabrb2<tm1.1Twr>/Gabrb2<tm1.1Twr>	involves: 129S7/SvEvBrd * C57BL/6	MGI:3713734	hm	abnormal distortion product otoacoustic emission
Gabrb2<tm1.1Twr>/Gabrb2<tm1.1Twr>	involves: 129S7/SvEvBrd * C57BL/6	MGI:3713734	hm	abnormal spiral limbus morphology
Gabrb2<tm1.1Twr>/Gabrb2<tm1.1Twr>	involves: 129S7/SvEvBrd * C57BL/6	MGI:3713734	hm	cochlear ganglion degeneration
Gabrb2<tm1.1Twr>/Gabrb2<tm1.1Twr>	involves: 129S7/SvEvBrd * C57BL/6	MGI:3713734	hm	cochlear inner hair cell degeneration
Gabrb2<tm1.1Twr>/Gabrb2<tm1.1Twr>	involves: 129S7/SvEvBrd * C57BL/6	MGI:3713734	hm	cochlear outer hair cell degeneration
Gabrb2<tm1.1Twr>/Gabrb2<tm1.1Twr>	involves: 129S7/SvEvBrd * C57BL/6	MGI:3713734	hm	increased or absent threshold for auditory brainstem response
Gabrb2<tm1.1Twr>/Gabrb2<tm1.1Twr>	involves: 129S7/SvEvBrd * C57BL/6	MGI:3713734	hm	sensorineural hearing loss
Gabrb2<tm1.1Twr>/Gabrb2<tm1.1Twr>	involves: 129S7/SvEvBrd * C57BL/6	MGI:3713734	hm	type IV spiral ligament fibrocyte degeneration
Gabrb2<tm1Twr>/Gabrb2<tm1Twr>	involves: 129S7/SvEvBrd * C57BL/6	MGI:3832434	hm	abnormal GABA-mediated receptor currents
Gabrb2<tm1Twr>/Gabrb2<tm1Twr>	involves: 129S7/SvEvBrd * C57BL/6	MGI:3832434	hm	homeostasis/metabolism phenotype
Gabrb2<tm1Twr>/Gabrb2<tm1Twr>	involves: 129S7/SvEvBrd * C57BL/6	MGI:3832434	hm	hyperactivity
Gabrg2<tm1Geh>/Gabrg2<tm1Geh>	involves: 129S1/Sv * 129X1/SvJ * C57BL/6J	MGI:3835047	hm	abnormal GABA-mediated receptor currents
Gabrg2<tm1Geh>/Gabrg2<tm1Geh>	involves: 129S1/Sv * 129X1/SvJ * C57BL/6J	MGI:3835047	hm	abnormal xenobiotic pharmacokinetics
Gabrg2<tm1Geh>/Gabrg2<tm1Geh>	involves: 129S1/Sv * 129X1/SvJ * C57BL/6J	MGI:3835047	hm	behavior/neurological phenotype
Gabrg2<tm1Geh>/Gabrg2<tm1Geh>	involves: 129S1/Sv * 129X1/SvJ * C57BL/6J	MGI:3835047	hm	enhanced behavioral response to xenobiotic
Gabrg2<tm1Lusc>/Gabrg2<tm1Lusc>	involves: 129P2/OlaHsd * C57BL/6	MGI:2177609	hm	abnormal gait
Gabrg2<tm1Lusc>/Gabrg2<tm1Lusc>	involves: 129P2/OlaHsd * C57BL/6	MGI:2177609	hm	complete postnatal lethality
Gabrg2<tm1Lusc>/Gabrg2<tm1Lusc>	involves: 129P2/OlaHsd * C57BL/6	MGI:2177609	hm	hyperactivity
Gabrg2<tm1Lusc>/Gabrg2<tm1Lusc>	involves: 129P2/OlaHsd * C57BL/6	MGI:2177609	hm	impaired righting response
Gabrg2<tm1Lusc>/Gabrg2<tm1Lusc>	involves: 129P2/OlaHsd * C57BL/6	MGI:2177609	hm	limb grasping
Gabrg2<tm1Lusc>/Gabrg2<tm1Lusc>	involves: 129P2/OlaHsd * C57BL/6	MGI:2177609	hm	nervous system phenotype
Gabrg2<tm2.1Geh>/Gabrg2<tm2.1Geh>	involves: 129S1/Sv * 129X1/SvJ * C57BL/6J * FVB/N	MGI:3582973	hm	complete postnatal lethality
Gls<tm1Sray>/Gls<tm1Sray>	involves: 129S1/Sv * C57BL/6	MGI:3626059	hm	abnormal behavior
Gls<tm1Sray>/Gls<tm1Sray>	involves: 129S1/Sv * C57BL/6	MGI:3626059	hm	abnormal respiratory function
Gls<tm1Sray>/Gls<tm1Sray>	involves: 129S1/Sv * C57BL/6	MGI:3626059	hm	complete neonatal lethality
Gria1<tm1Ksak>/Gria1<tm1Ksak>	Not Specified	MGI:4949280	hm	no phenotypic analysis
Gria1<tm1Rsp>/Gria1<tm1Rsp>	B6.129-Gria1<tm1Rsp>	MGI:3588768	hm	abnormal nociception after inflammation
Gria1<tm1Rsp>/Gria1<tm1Rsp>	B6.129-Gria1<tm1Rsp>	MGI:3588768	hm	abnormal spinal cord morphology
Gria1<tm1Rsp>/Gria1<tm1Rsp>	B6.129-Gria1<tm1Rsp>	MGI:3588768	hm	decreased chemical nociceptive threshold
Gria1<tm1Rsp>/Gria1<tm1Rsp>	B6.129-Gria1<tm1Rsp>	MGI:3588768	hm	impaired synaptic plasticity
Gria1<tm1Rsp>/Gria1<tm1Rsp>	B6.129-Gria1<tm1Rsp>	MGI:3588768	hm	increased anxiety-related response
Gria1<tm1Rsp>/Gria1<tm1Rsp>	B6.129-Gria1<tm1Rsp>	MGI:3588768	hm	reduced AMPA-mediated synaptic currents
Gria1<tm1Rsp>/Gria1<tm1Rsp>	involves: 129S1/Sv * 129X1/SvJ * C57BL/6	MGI:3805109	hm	abnormal behavioral response to xenobiotic
Gria1<tm1Rsp>/Gria1<tm1Rsp>	involves: 129S1/Sv * 129X1/SvJ * C57BL/6	MGI:3805109	hm	abnormal locomotor behavior
Gria1<tm1Rsp>/Gria1<tm1Rsp>	involves: 129S1/Sv * 129X1/SvJ * C57BL/6	MGI:3805109	hm	abnormal response to new environment
Gria1<tm1Rsp>/Gria1<tm1Rsp>	involves: 129S1/Sv * 129X1/SvJ * C57BL/6	MGI:3805109	hm	abnormal serotonin level
Gria1<tm1Rsp>/Gria1<tm1Rsp>	involves: 129S1/Sv * 129X1/SvJ * C57BL/6	MGI:3805109	hm	abnormal sexual interaction
Gria1<tm1Rsp>/Gria1<tm1Rsp>	involves: 129S1/Sv * 129X1/SvJ * C57BL/6	MGI:3805109	hm	abnormal social investigation
Gria1<tm1Rsp>/Gria1<tm1Rsp>	involves: 129S1/Sv * 129X1/SvJ * C57BL/6	MGI:3805109	hm	behavior/neurological phenotype
Gria1<tm1Rsp>/Gria1<tm1Rsp>	involves: 129S1/Sv * 129X1/SvJ * C57BL/6	MGI:3805109	hm	decreased aggression towards males
Gria1<tm1Rsp>/Gria1<tm1Rsp>	involves: 129S1/Sv * 129X1/SvJ * C57BL/6	MGI:3805109	hm	decreased anxiety-related response
Gria1<tm1Rsp>/Gria1<tm1Rsp>	involves: 129S1/Sv * 129X1/SvJ * C57BL/6	MGI:3805109	hm	decreased behavioral withdrawal response
Gria1<tm1Rsp>/Gria1<tm1Rsp>	involves: 129S1/Sv * 129X1/SvJ * C57BL/6	MGI:3805109	hm	decreased body size
Gria1<tm1Rsp>/Gria1<tm1Rsp>	involves: 129S1/Sv * 129X1/SvJ * C57BL/6	MGI:3805109	hm	homeostasis/metabolism phenotype
Gria1<tm1Rsp>/Gria1<tm1Rsp>	involves: 129S1/Sv * 129X1/SvJ * C57BL/6	MGI:3805109	hm	hyperactivity
Gria1<tm1Rsp>/Gria1<tm1Rsp>	involves: 129S1/Sv * 129X1/SvJ * C57BL/6	MGI:3805109	hm	increased exploration in new environment
Gria1<tm1Rsp>/Gria1<tm1Rsp>	involves: 129S1/Sv * 129X1/SvJ * C57BL/6	MGI:3805109	hm	increased vertical activity
Gria1<tm1Rsp>/Gria1<tm1Rsp>	involves: 129S1/Sv * 129X1/SvJ * C57BL/6	MGI:3805109	hm	nervous system phenotype
Gria1<tm1Rsp>/Gria1<tm1Rsp>	involves: 129S1/Sv * 129X1/SvJ * C57BL/6	MGI:3805109	hm	reduced AMPA-mediated synaptic currents
Gria1<tm1Rsp>/Gria1<tm1Rsp>	involves: 129S1/Sv * 129X1/SvJ * C57BL/6	MGI:3805109	hm	reduced long term potentiation
Gria1<tm1Rsp>/Gria1<tm1Rsp>	involves: 129S1/Sv * 129X1/SvJ * C57BL/6J	MGI:4888959	hm	abnormal emotion/affect behavior
Gria1<tm1Rsp>/Gria1<tm1Rsp>	involves: 129S1/Sv * 129X1/SvJ * C57BL/6J * CBA/J	MGI:4888960	hm	abnormal emotion/affect behavior
Gria1<tm1Rsp>/Gria1<tm1Rsp>	involves: 129S1/Sv * 129X1/SvJ * C57BL/6J * CBA/J	MGI:4888960	hm	homeostasis/metabolism phenotype
Gria1<tm1Rsp>/Gria1<tm1Rsp>	involves: 129S1/Sv * 129X1/SvJ * C57BL/6J * CBA/J	MGI:4888960	hm	hyperactivity
Gria1<tm1Rsp>/Gria1<tm1Rsp>	involves: 129S1/Sv * 129X1/SvJ * C57BL/6J * CBA/J	MGI:4888960	hm	increased exploration in new environment
Gria1<tm1Rsp>/Gria1<tm1Rsp>	involves: 129S1/Sv * 129X1/SvJ * C57BL/6J * CBA/J	MGI:4888960	hm	induced hyperactivity
Gria1<tm2Rlh>/Gria1<tm2Rlh>	B6.Cg-Gria1<tm2Rlh>	MGI:3817235	hm	abnormal dendrite morphology
Gria1<tm2Rlh>/Gria1<tm2Rlh>	involves: 129 * C57BL/6	MGI:3700130	hm	nervous system phenotype
Gria1<tm3Rlh>/Gria1<tm3Rlh>	involves: C57BL/6	MGI:3700131	hm	no phenotypic analysis
Grin1<tm1Cur>/Grin1<tm1Cur>	involves: 129S1/Sv * C57BL/6	MGI:2175047	hm	abnormal glutamate-mediated receptor currents
Grin1<tm1Cur>/Grin1<tm1Cur>	involves: 129S1/Sv * C57BL/6	MGI:2175047	hm	absence of NMDA-mediated synaptic currents
Grin1<tm1Cur>/Grin1<tm1Cur>	involves: 129S1/Sv * C57BL/6	MGI:2175047	hm	absent gastric milk in neonates
Grin1<tm1Cur>/Grin1<tm1Cur>	involves: 129S1/Sv * C57BL/6	MGI:2175047	hm	atelectasis
Grin1<tm1Cur>/Grin1<tm1Cur>	involves: 129S1/Sv * C57BL/6	MGI:2175047	hm	cardiovascular system phenotype
Grin1<tm1Cur>/Grin1<tm1Cur>	involves: 129S1/Sv * C57BL/6	MGI:2175047	hm	complete perinatal lethality
Grin1<tm1Cur>/Grin1<tm1Cur>	involves: 129S1/Sv * C57BL/6	MGI:2175047	hm	cyanosis
Grin1<tm1Cur>/Grin1<tm1Cur>	involves: 129S1/Sv * C57BL/6	MGI:2175047	hm	lung hemorrhage
Grin1<tm1Cur>/Grin1<tm1Cur>	involves: 129S1/Sv * C57BL/6	MGI:2175047	hm	nervous system phenotype
Grin1<tm1Cur>/Grin1<tm1Cur>	involves: 129S1/Sv * C57BL/6	MGI:2175047	hm	overexpanded pulmonary alveoli
Grin1<tm1Nak>/Grin1<tm1Nak>	involves: 129S/Sv * C57BL/6 * DBA/2	MGI:3809935	hm	abnormal glutamate-mediated receptor currents
Grin1<tm1Nak>/Grin1<tm1Nak>	involves: 129S/Sv * C57BL/6 * DBA/2	MGI:3809935	hm	abnormal suckling behavior
Grin1<tm1Nak>/Grin1<tm1Nak>	involves: 129S/Sv * C57BL/6 * DBA/2	MGI:3809935	hm	absent gastric milk in neonates
Grin1<tm1Nak>/Grin1<tm1Nak>	involves: 129S/Sv * C57BL/6 * DBA/2	MGI:3809935	hm	complete neonatal lethality
Grin1<tm1Nak>/Grin1<tm1Nak>	involves: 129S/Sv * C57BL/6 * DBA/2	MGI:3809935	hm	cyanosis
Grin1<tm1Nak>/Grin1<tm1Nak>	involves: 129S/Sv * C57BL/6 * DBA/2	MGI:3809935	hm	decreased susceptibility to neuronal excitotoxicity
Grin1<tm1Stl>/Grin1<tm1Stl>	either: (involves: 129S2/SvPas * 129/Sv) or (involves: 129S2/SvPas * BALB/c) or (involves: 129S2/SvPas * C57BL/6)	MGI:2175049	hm	abnormal brainstem morphology
Grin1<tm1Stl>/Grin1<tm1Stl>	either: (involves: 129S2/SvPas * 129/Sv) or (involves: 129S2/SvPas * BALB/c) or (involves: 129S2/SvPas * C57BL/6)	MGI:2175049	hm	abnormal suckling behavior
Grin1<tm1Stl>/Grin1<tm1Stl>	either: (involves: 129S2/SvPas * 129/Sv) or (involves: 129S2/SvPas * BALB/c) or (involves: 129S2/SvPas * C57BL/6)	MGI:2175049	hm	absence of NMDA-mediated synaptic currents
Grin1<tm1Stl>/Grin1<tm1Stl>	either: (involves: 129S2/SvPas * 129/Sv) or (involves: 129S2/SvPas * BALB/c) or (involves: 129S2/SvPas * C57BL/6)	MGI:2175049	hm	apnea
Grin1<tm1Stl>/Grin1<tm1Stl>	either: (involves: 129S2/SvPas * 129/Sv) or (involves: 129S2/SvPas * BALB/c) or (involves: 129S2/SvPas * C57BL/6)	MGI:2175049	hm	ataxia
Grin1<tm1Stl>/Grin1<tm1Stl>	either: (involves: 129S2/SvPas * 129/Sv) or (involves: 129S2/SvPas * BALB/c) or (involves: 129S2/SvPas * C57BL/6)	MGI:2175049	hm	complete neonatal lethality
Grin1<tm1Stl>/Grin1<tm1Stl>	either: (involves: 129S2/SvPas * 129/Sv) or (involves: 129S2/SvPas * BALB/c) or (involves: 129S2/SvPas * C57BL/6)	MGI:2175049	hm	cyanosis
Kcnma1<tm1Ruth>/Kcnma1<tm1Ruth>	129-Kcnma1<tm1Ruth>	MGI:3711314	hm	abnormal cochlear IHC afferent innervation pattern
Kcnma1<tm1Ruth>/Kcnma1<tm1Ruth>	129-Kcnma1<tm1Ruth>	MGI:3711314	hm	abnormal cochlear inner hair cell physiology
Kcnma1<tm1Ruth>/Kcnma1<tm1Ruth>	129-Kcnma1<tm1Ruth>	MGI:3711314	hm	abnormal cochlear nerve fiber response
Kcnma1<tm1Ruth>/Kcnma1<tm1Ruth>	129-Kcnma1<tm1Ruth>	MGI:3711314	hm	abnormal distortion product otoacoustic emission
Kcnma1<tm1Ruth>/Kcnma1<tm1Ruth>	129-Kcnma1<tm1Ruth>	MGI:3711314	hm	abnormal hearing electrophysiology
Kcnma1<tm1Ruth>/Kcnma1<tm1Ruth>	involves: 129/Sv * C57BL/6	MGI:3050200	hm	abnormal digestive system physiology
Kcnma1<tm1Ruth>/Kcnma1<tm1Ruth>	involves: 129/Sv * C57BL/6	MGI:3050200	hm	abnormal eye blink conditioning behavior
Kcnma1<tm1Ruth>/Kcnma1<tm1Ruth>	involves: 129/Sv * C57BL/6	MGI:3050200	hm	abnormal feces composition
Kcnma1<tm1Ruth>/Kcnma1<tm1Ruth>	involves: 129/Sv * C57BL/6	MGI:3050200	hm	abnormal gait
Kcnma1<tm1Ruth>/Kcnma1<tm1Ruth>	involves: 129/Sv * C57BL/6	MGI:3050200	hm	abnormal motor capabilities/coordination/movement
Kcnma1<tm1Ruth>/Kcnma1<tm1Ruth>	involves: 129/Sv * C57BL/6	MGI:3050200	hm	abnormal muscle contractility
Kcnma1<tm1Ruth>/Kcnma1<tm1Ruth>	involves: 129/Sv * C57BL/6	MGI:3050200	hm	abnormal postnatal growth
Kcnma1<tm1Ruth>/Kcnma1<tm1Ruth>	involves: 129/Sv * C57BL/6	MGI:3050200	hm	abnormal urinary bladder physiology
Kcnma1<tm1Ruth>/Kcnma1<tm1Ruth>	involves: 129/Sv * C57BL/6	MGI:3050200	hm	ataxia
Kcnma1<tm1Ruth>/Kcnma1<tm1Ruth>	involves: 129/Sv * C57BL/6	MGI:3050200	hm	impaired ability to fire action potentials
Kcnma1<tm1Ruth>/Kcnma1<tm1Ruth>	involves: 129/Sv * C57BL/6	MGI:3050200	hm	impaired coordination
Kcnma1<tm1Ruth>/Kcnma1<tm1Ruth>	involves: 129/Sv * C57BL/6	MGI:3050200	hm	impaired swimming
Kcnma1<tm1Ruth>/Kcnma1<tm1Ruth>	involves: 129/Sv * C57BL/6	MGI:3050200	hm	increased blinking frequency
Kcnma1<tm1Ruth>/Kcnma1<tm1Ruth>	involves: 129/Sv * C57BL/6	MGI:3050200	hm	increased muscle relaxation
Kcnma1<tm1Ruth>/Kcnma1<tm1Ruth>	involves: 129/Sv * C57BL/6	MGI:3050200	hm	increased synaptic depression
Kcnma1<tm1Ruth>/Kcnma1<tm1Ruth>	involves: 129/Sv * C57BL/6	MGI:3050200	hm	increased systemic arterial blood pressure
Kcnma1<tm1Ruth>/Kcnma1<tm1Ruth>	involves: 129/Sv * C57BL/6	MGI:3050200	hm	increased urination frequency
Kcnma1<tm1Ruth>/Kcnma1<tm1Ruth>	involves: 129/Sv * C57BL/6	MGI:3050200	hm	short stride length
Kcnma1<tm1Ruth>/Kcnma1<tm1Ruth>	involves: 129/Sv * C57BL/6	MGI:3050200	hm	tremors
Kcnma1<tm1Ruth>/Kcnma1<tm1Ruth>	involves: 129X1/SvJ	MGI:3629389	hm	absent distortion product otoacoustic emissions
Kcnma1<tm1Ruth>/Kcnma1<tm1Ruth>	involves: 129X1/SvJ	MGI:3629389	hm	cochlear outer hair cell degeneration
Kcnma1<tm1Ruth>/Kcnma1<tm1Ruth>	involves: 129X1/SvJ	MGI:3629389	hm	Deiters cell degeneration
Kcnma1<tm1Ruth>/Kcnma1<tm1Ruth>	involves: 129X1/SvJ	MGI:3629389	hm	increased apoptosis
Kcnma1<tm1Ruth>/Kcnma1<tm1Ruth>	involves: 129X1/SvJ	MGI:3629389	hm	increased susceptibility to noise-induced hearing loss
Kcnma1<tm1Ruth>/Kcnma1<tm1Ruth>	involves: 129X1/SvJ	MGI:3629389	hm	sensorineural hearing loss
Kcnma1<tm1Rwa>/Kcnma1<tm1Rwa>	FVB.129-Kcnma1<tm1Rwa>	MGI:3053922	hm	abnormal cochlear inner hair cell physiology
Kcnma1<tm1Rwa>/Kcnma1<tm1Rwa>	FVB.129-Kcnma1<tm1Rwa>	MGI:3053922	hm	abnormal gait
Kcnma1<tm1Rwa>/Kcnma1<tm1Rwa>	FVB.129-Kcnma1<tm1Rwa>	MGI:3053922	hm	abnormal urinary bladder physiology
Kcnma1<tm1Rwa>/Kcnma1<tm1Rwa>	FVB.129-Kcnma1<tm1Rwa>	MGI:3053922	hm	ataxia
Kcnma1<tm1Rwa>/Kcnma1<tm1Rwa>	FVB.129-Kcnma1<tm1Rwa>	MGI:3053922	hm	decreased body weight
Kcnma1<tm1Rwa>/Kcnma1<tm1Rwa>	FVB.129-Kcnma1<tm1Rwa>	MGI:3053922	hm	decreased litter size
Kcnma1<tm1Rwa>/Kcnma1<tm1Rwa>	FVB.129-Kcnma1<tm1Rwa>	MGI:3053922	hm	decreased susceptibility to noise-induced hearing loss
Kcnma1<tm1Rwa>/Kcnma1<tm1Rwa>	FVB.129-Kcnma1<tm1Rwa>	MGI:3053922	hm	impaired coordination
Kcnma1<tm1Rwa>/Kcnma1<tm1Rwa>	FVB.129-Kcnma1<tm1Rwa>	MGI:3053922	hm	increased urination frequency
Kcnma1<tm1Rwa>/Kcnma1<tm1Rwa>	FVB.129-Kcnma1<tm1Rwa>	MGI:3053922	hm	premature death
Kcnma1<tm1Rwa>/Kcnma1<tm1Rwa>	FVB.129-Kcnma1<tm1Rwa>	MGI:3053922	hm	short stride length
Kcnma1<tm1Rwa>/Kcnma1<tm1Rwa>	FVB.129-Kcnma1<tm1Rwa>	MGI:3053922	hm	unidirectional circling
Kcnma1<tm1Rwa>/Kcnma1<tm1Rwa>	FVB.129-Kcnma1<tm1Rwa>	MGI:3053922	hm	urinary incontinence
Kcnma1<tm1Rwa>/Kcnma1<tm1Rwa>	involves: 129S1/Sv * 129X1/SvJ	MGI:5695229	hm	abnormal action potential
Kcnma1<tm1Rwa>/Kcnma1<tm1Rwa>	involves: 129S1/Sv * 129X1/SvJ	MGI:5695229	hm	abnormal channel response
Kif3c<tm1Gsn>/Kif3c<tm1Gsn>	involves: 129S1/Sv * 129X1/SvJ * C57BL/6J	MGI:3619224	hm	no abnormal phenotype detected
Kif3c<tm3Gsn>/Kif3c<tm3Gsn>	involves: 129S1/Sv * 129X1/SvJ * C57BL/6J	MGI:3619223	hm	no abnormal phenotype detected
Kif5c<tm1Gsn>/Kif5c<tm1Gsn>	B6.129-Kif5c<tm1Gsn>	MGI:3809842	hm	no abnormal phenotype detected
Kif5c<tm1Noh>/Kif5c<tm1Noh>	involves: 129S4/SvJae * C57BL/6J	MGI:3583002	hm	decreased brain size
Kif5c<tm1Noh>/Kif5c<tm1Noh>	involves: 129S4/SvJae * C57BL/6J	MGI:3583002	hm	decreased motor neuron number
Kif5c<tm1Noh>/Kif5c<tm1Noh>	involves: 129S4/SvJae * C57BL/6J	MGI:3583002	hm	increased sensory neuron number
Kif5c<tm2Gsn>/Kif5c<tm2Gsn>	involves: 129S1/Sv * 129X1/SvJ * C57BL/6J	MGI:4949220	hm	abnormal vesicle-mediated transport
Kifc2<tm1Gsn>/Kifc2<tm1Gsn>	involves: 129S1/Sv * 129X1/SvJ * C57BL/6J	MGI:3038224	hm	behavior/neurological phenotype
Kifc2<tm1Gsn>/Kifc2<tm1Gsn>	involves: 129S1/Sv * 129X1/SvJ * C57BL/6J	MGI:3038224	hm	hematopoietic system phenotype
Map3k12<tm1.1Lewc>/Map3k12<tm1.1Lewc>	Not Specified	MGI:5294552	hm	abnormal dorsal root ganglion morphology
Map3k12<tm1.1Lewc>/Map3k12<tm1.1Lewc>	Not Specified	MGI:5294552	hm	abnormal neuron differentiation
Map3k12<tm1.1Lewc>/Map3k12<tm1.1Lewc>	Not Specified	MGI:5294552	hm	decreased neuron apoptosis
Map3k12<tm1.2Adia>/Map3k12<tm1.2Adia>	involves: C57BL/6 * C57BL/6J * SJL	MGI:5440728	hm	perinatal lethality
Map3k12<tm1.2Adia>/Map3k12<tm1.2Adia>	involves: C57BL/6 * C57BL/6J * SJL	MGI:5440728	hm	slow Wallerian degeneration
Map3k12<tm1Shir>/Map3k12<tm1Shir>	B6.Cg-Mapk12<tm1Shir>	MGI:3693127	hm	abnormal anterior commissure morphology
Map3k12<tm1Shir>/Map3k12<tm1Shir>	B6.Cg-Mapk12<tm1Shir>	MGI:3693127	hm	abnormal anterior commissure pars anterior morphology
Map3k12<tm1Shir>/Map3k12<tm1Shir>	B6.Cg-Mapk12<tm1Shir>	MGI:3693127	hm	abnormal anterior commissure pars posterior morphology
Map3k12<tm1Shir>/Map3k12<tm1Shir>	B6.Cg-Mapk12<tm1Shir>	MGI:3693127	hm	abnormal brain internal capsule morphology
Map3k12<tm1Shir>/Map3k12<tm1Shir>	B6.Cg-Mapk12<tm1Shir>	MGI:3693127	hm	abnormal brain morphology
Map3k12<tm1Shir>/Map3k12<tm1Shir>	B6.Cg-Mapk12<tm1Shir>	MGI:3693127	hm	abnormal brain white matter morphology
Map3k12<tm1Shir>/Map3k12<tm1Shir>	B6.Cg-Mapk12<tm1Shir>	MGI:3693127	hm	abnormal cerebral cortex morphology
Map3k12<tm1Shir>/Map3k12<tm1Shir>	B6.Cg-Mapk12<tm1Shir>	MGI:3693127	hm	abnormal cingulum morphology
Map3k12<tm1Shir>/Map3k12<tm1Shir>	B6.Cg-Mapk12<tm1Shir>	MGI:3693127	hm	abnormal enzyme/coenzyme activity
Map3k12<tm1Shir>/Map3k12<tm1Shir>	B6.Cg-Mapk12<tm1Shir>	MGI:3693127	hm	abnormal neuronal migration
Map3k12<tm1Shir>/Map3k12<tm1Shir>	B6.Cg-Mapk12<tm1Shir>	MGI:3693127	hm	abnormal olfactory bulb morphology
Map3k12<tm1Shir>/Map3k12<tm1Shir>	B6.Cg-Mapk12<tm1Shir>	MGI:3693127	hm	abnormal olfactory tract morphology
Map3k12<tm1Shir>/Map3k12<tm1Shir>	B6.Cg-Mapk12<tm1Shir>	MGI:3693127	hm	complete postnatal lethality
Map3k12<tm1Shir>/Map3k12<tm1Shir>	B6.Cg-Mapk12<tm1Shir>	MGI:3693127	hm	decreased corpus callosum size
Mapk10<tm1a(EUCOMM)Wtsi>/Mapk10<tm1a(EUCOMM)Wtsi>	C57BL/6N-Mapk10<tm1a(EUCOMM)Wtsi>/Wtsi	MGI:5608480	hm	increased hematocrit
Mapk10<tm1a(EUCOMM)Wtsi>/Mapk10<tm1a(EUCOMM)Wtsi>	Not Specified	MGI:5587060	hm	hypoactivity
Mapk10<tm1Flv>/Mapk10<tm1Flv>	B6.129S1-Mapk10<tm1Flv>	MGI:3580019	hm	abnormal dopamine level
Mapk10<tm1Flv>/Mapk10<tm1Flv>	B6.129S1-Mapk10<tm1Flv>	MGI:3580019	hm	abnormal somatic motor system morphology
Mapk10<tm1Flv>/Mapk10<tm1Flv>	B6.129S1-Mapk10<tm1Flv>	MGI:3580019	hm	decreased susceptibility to dopaminergic neuron neurotoxicity
Mapk10<tm1Flv>/Mapk10<tm1Flv>	B6.129S1-Mapk10<tm1Flv>	MGI:3580019	hm	impaired coordination
Mapk10<tm1Flv>/Mapk10<tm1Flv>	involves: 129S1/Sv	MGI:3580018	hm	abnormal cell death
Mapk10<tm1Flv>/Mapk10<tm1Flv>	involves: 129S1/Sv	MGI:3580018	hm	cardiovascular system phenotype
Mapk10<tm1Flv>/Mapk10<tm1Flv>	involves: 129S1/Sv	MGI:3580018	hm	decreased neuron apoptosis
Mapk10<tm1Flv>/Mapk10<tm1Flv>	involves: 129S1/Sv	MGI:3580018	hm	decreased susceptibility to neuronal excitotoxicity
Mapk10<tm1Flv>/Mapk10<tm1Flv>	involves: 129S1/Sv	MGI:3580018	hm	decreased susceptibility to pharmacologically induced seizures
Mapk8ip2<tm1.1Gol>/Mapk8ip2<tm1.1Gol>	129S/SvEv-Mapk8ip2<tm1.1Gol>	MGI:4867727	hm	abnormal excitatory postsynaptic currents
Mapk8ip2<tm1.1Gol>/Mapk8ip2<tm1.1Gol>	129S/SvEv-Mapk8ip2<tm1.1Gol>	MGI:4867727	hm	abnormal miniature excitatory postsynaptic currents
Mapk8ip2<tm1.1Gol>/Mapk8ip2<tm1.1Gol>	129S/SvEv-Mapk8ip2<tm1.1Gol>	MGI:4867727	hm	abnormal Purkinje cell dendrite morphology
Mapk8ip2<tm1.1Gol>/Mapk8ip2<tm1.1Gol>	129S/SvEv-Mapk8ip2<tm1.1Gol>	MGI:4867727	hm	abnormal Purkinje cell morphology
Mapk8ip2<tm1.1Gol>/Mapk8ip2<tm1.1Gol>	129S/SvEv-Mapk8ip2<tm1.1Gol>	MGI:4867727	hm	abnormal social investigation
Mapk8ip2<tm1.1Gol>/Mapk8ip2<tm1.1Gol>	129S/SvEv-Mapk8ip2<tm1.1Gol>	MGI:4867727	hm	behavior/neurological phenotype
Mapk8ip2<tm1.1Gol>/Mapk8ip2<tm1.1Gol>	129S/SvEv-Mapk8ip2<tm1.1Gol>	MGI:4867727	hm	decreased anxiety-related response
Mapk8ip2<tm1.1Gol>/Mapk8ip2<tm1.1Gol>	129S/SvEv-Mapk8ip2<tm1.1Gol>	MGI:4867727	hm	decreased exploration in new environment
Mapk8ip2<tm1.1Gol>/Mapk8ip2<tm1.1Gol>	129S/SvEv-Mapk8ip2<tm1.1Gol>	MGI:4867727	hm	decreased grip strength
Mapk8ip2<tm1.1Gol>/Mapk8ip2<tm1.1Gol>	129S/SvEv-Mapk8ip2<tm1.1Gol>	MGI:4867727	hm	decreased synaptic glutamate release
Mapk8ip2<tm1.1Gol>/Mapk8ip2<tm1.1Gol>	129S/SvEv-Mapk8ip2<tm1.1Gol>	MGI:4867727	hm	enhanced NMDA-mediated synaptic currents
Mapk8ip2<tm1.1Gol>/Mapk8ip2<tm1.1Gol>	129S/SvEv-Mapk8ip2<tm1.1Gol>	MGI:4867727	hm	impaired coordination
Mapk8ip2<tm1.1Gol>/Mapk8ip2<tm1.1Gol>	129S/SvEv-Mapk8ip2<tm1.1Gol>	MGI:4867727	hm	nervous system phenotype
Mapk8ip2<tm1.1Gol>/Mapk8ip2<tm1.1Gol>	129S/SvEv-Mapk8ip2<tm1.1Gol>	MGI:4867727	hm	reduced AMPA-mediated synaptic currents
Mapk8ip2<tm1.1Gol>/Mapk8ip2<tm1.1Gol>	129S/SvEv-Mapk8ip2<tm1.1Gol>	MGI:4867727	hm	reduced fertility
Mapk8ip2<tm1.1Gol>/Mapk8ip2<tm1.1Gol>	129S/SvEv-Mapk8ip2<tm1.1Gol>	MGI:4867727	hm	taste/olfaction phenotype
Mapk8ip2<tm1.1Gol>/Mapk8ip2<tm1.1Gol>	129S/SvEv-Mapk8ip2<tm1.1Gol>	MGI:4867727	hm	thin cerebellar molecular layer
Mapk8ip2<tm1.1Gol>/Mapk8ip2<tm1.1Gol>	129S/SvEv-Mapk8ip2<tm1.1Gol>	MGI:4867727	hm	vision/eye phenotype
Mapk8ip2<tm1Rjd>/Mapk8ip2<tm1Rjd>	involves: 129X1/SvJ * C57BL/6	MGI:3759993	hm	abnormal NMDA-mediated synaptic currents
Mapk8ip2<tm1Rjd>/Mapk8ip2<tm1Rjd>	involves: 129X1/SvJ * C57BL/6	MGI:3759993	hm	decreased body size
Mapk8ip2<tm1Rjd>/Mapk8ip2<tm1Rjd>	involves: 129X1/SvJ * C57BL/6	MGI:3759993	hm	male infertility
Mapk8<tm1Flv>/Mapk8<tm1Flv>	B6.129S1-Mapk8<tm1Flv>	MGI:3691065	hm	abnormal epidermis stratum basale morphology
Mapk8<tm1Flv>/Mapk8<tm1Flv>	B6.129S1-Mapk8<tm1Flv>	MGI:3691065	hm	abnormal keratinocyte differentiation
Mapk8<tm1Flv>/Mapk8<tm1Flv>	B6.129S1-Mapk8<tm1Flv>	MGI:3691065	hm	thin epidermis
Mapk8<tm1Flv>/Mapk8<tm1Flv>	B6.129S1-Mapk8<tm1Flv>/J	MGI:3691566	hm	liver/biliary system phenotype
Mapk8<tm1Flv>/Mapk8<tm1Flv>	involves: 129S1/Sv	MGI:3690770	hm	abnormal cytokine secretion
Mapk8<tm1Flv>/Mapk8<tm1Flv>	involves: 129S1/Sv	MGI:3690770	hm	abnormal T-helper 1 cell differentiation
Mapk8<tm1Flv>/Mapk8<tm1Flv>	involves: 129S1/Sv	MGI:3690770	hm	cardiac fibrosis
Mapk8<tm1Flv>/Mapk8<tm1Flv>	involves: 129S1/Sv	MGI:3690770	hm	decreased cardiac muscle contractility
Mapk8<tm1Flv>/Mapk8<tm1Flv>	involves: 129S1/Sv	MGI:3690770	hm	increased cardiomyocyte apoptosis
Mapk8<tm1Flv>/Mapk8<tm1Flv>	involves: 129S1/Sv	MGI:3690770	hm	increased incidence of tumors by chemical induction
Mapk8<tm1Flv>/Mapk8<tm1Flv>	involves: 129S1/Sv	MGI:3690770	hm	increased response of heart to induced stress
Mapk8<tm1Flv>/Mapk8<tm1Flv>	involves: 129S1/Sv	MGI:3690770	hm	increased T cell proliferation
Mapk8<tm1Flv>/Mapk8<tm1Flv>	involves: 129S1/Sv * C57BL/6	MGI:3053054	hm	abnormal enzyme/coenzyme activity
Mapk8<tm1Flv>/Mapk8<tm1Flv>	involves: 129S1/Sv * C57BL/6	MGI:3053054	hm	abnormal myocardium layer morphology
Mapk8<tm1Flv>/Mapk8<tm1Flv>	involves: 129S1/Sv * C57BL/6	MGI:3053054	hm	decreased cardiomyocyte apoptosis
Mapk8<tm1Wag>/Mapk8<tm1Wag>	B6.129P2-Mapk8<tm1Wag>	MGI:3619043	hm	abnormal fat cell morphology
Mapk8<tm1Wag>/Mapk8<tm1Wag>	B6.129P2-Mapk8<tm1Wag>	MGI:3619043	hm	decreased circulating glucose level
Mapk8<tm1Wag>/Mapk8<tm1Wag>	B6.129P2-Mapk8<tm1Wag>	MGI:3619043	hm	decreased circulating insulin level
Mapk8<tm1Wag>/Mapk8<tm1Wag>	B6.129P2-Mapk8<tm1Wag>	MGI:3619043	hm	decreased subcutaneous adipose tissue amount
Mapk8<tm1Wag>/Mapk8<tm1Wag>	B6.129P2-Mapk8<tm1Wag>	MGI:3619043	hm	decreased susceptibility to diet-induced obesity
Mapk8<tm1Wag>/Mapk8<tm1Wag>	B6.129P2-Mapk8<tm1Wag>	MGI:3619043	hm	decreased total body fat amount
Mapk8<tm1Wag>/Mapk8<tm1Wag>	B6.129P2-Mapk8<tm1Wag>	MGI:3619043	hm	improved glucose tolerance
Mapk8<tm1Wag>/Mapk8<tm1Wag>	B6.129P2-Mapk8<tm1Wag>	MGI:3619043	hm	increased epididymal fat pad weight
Mapk8<tm1Wag>/Mapk8<tm1Wag>	B6.129P2-Mapk8<tm1Wag>	MGI:3619043	hm	increased insulin sensitivity
Mapk8<tm1Wag>/Mapk8<tm1Wag>	involves: 129P2/OlaHsd	MGI:3619036	hm	abnormal T cell activation
Mapk8<tm1Wag>/Mapk8<tm1Wag>	involves: 129P2/OlaHsd	MGI:3619036	hm	decreased T cell apoptosis
Mapk8<tm1Wag>/Mapk8<tm1Wag>	involves: 129P2/OlaHsd	MGI:3619036	hm	decreased T cell proliferation
Mapt<tm1Aha>/Mapt<tm1Aha>	Not Specified	MGI:3721520	hm	abnormal axon morphology
Mapt<tm1(EGFP)Klt>/Mapt<tm1(EGFP)Klt>	B6.129S4-Mapt<tm1(EGFP)Klt>	MGI:5604725	hm	abnormal motor learning
Mapt<tm1(EGFP)Klt>/Mapt<tm1(EGFP)Klt>	B6.129S4-Mapt<tm1(EGFP)Klt>	MGI:5604725	hm	enhanced spatial learning
Mapt<tm1(EGFP)Klt>/Mapt<tm1(EGFP)Klt>	B6.129S4-Mapt<tm1(EGFP)Klt>	MGI:5604725	hm	impaired contextual conditioning behavior
Mapt<tm1(EGFP)Klt>/Mapt<tm1(EGFP)Klt>	B6.129S4-Mapt<tm1(EGFP)Klt>	MGI:5604725	hm	impaired cued conditioning behavior
Mapt<tm1(EGFP)Klt>/Mapt<tm1(EGFP)Klt>	B6.129S4-Mapt<tm1(EGFP)Klt>	MGI:5604725	hm	reduced long term potentiation
Mapt<tm1(EGFP)Klt>/Mapt<tm1(EGFP)Klt>	involves: 129S4/SvJae * C57BL/6	MGI:2670770	hm	behavior/neurological phenotype
Mapt<tm1(EGFP)Klt>/Mapt<tm1(EGFP)Klt>	involves: 129S4/SvJae * C57BL/6	MGI:2670770	hm	no abnormal phenotype detected
Mapt<tm1Hnd>/Mapt<tm1Hnd>	involves: 129X1/SvJ * C57BL/6	MGI:3718400	hm	abnormal axon extension
Mapt<tm1Hnd>/Mapt<tm1Hnd>	involves: 129X1/SvJ * C57BL/6	MGI:3718400	hm	abnormal dendrite morphology
Mapt<tm1Hnd>/Mapt<tm1Hnd>	involves: 129X1/SvJ * C57BL/6	MGI:3718400	hm	decreased susceptibility to pharmacologically induced seizures
Mapt<tm1(Mecp2)Jae>/Mapt<tm1(Mecp2)Jae>	B6.Cg-Mapt<tm1(Mecp2)Jae>	MGI:5318976	hm	abnormal associative learning
Mapt<tm1(Mecp2)Jae>/Mapt<tm1(Mecp2)Jae>	B6.Cg-Mapt<tm1(Mecp2)Jae>	MGI:5318976	hm	abnormal contextual conditioning behavior
Mapt<tm1(Mecp2)Jae>/Mapt<tm1(Mecp2)Jae>	B6.Cg-Mapt<tm1(Mecp2)Jae>	MGI:5318976	hm	abnormal cued conditioning behavior
Mapt<tm1(Mecp2)Jae>/Mapt<tm1(Mecp2)Jae>	B6.Cg-Mapt<tm1(Mecp2)Jae>	MGI:5318976	hm	abnormal miniature excitatory postsynaptic currents
Mapt<tm1(Mecp2)Jae>/Mapt<tm1(Mecp2)Jae>	B6.Cg-Mapt<tm1(Mecp2)Jae>	MGI:5318976	hm	abnormal object recognition memory
Mapt<tm1(Mecp2)Jae>/Mapt<tm1(Mecp2)Jae>	B6.Cg-Mapt<tm1(Mecp2)Jae>	MGI:5318976	hm	decreased body weight
Mapt<tm1(Mecp2)Jae>/Mapt<tm1(Mecp2)Jae>	B6.Cg-Mapt<tm1(Mecp2)Jae>	MGI:5318976	hm	enhanced paired-pulse facilitation
Mapt<tm1(Mecp2)Jae>/Mapt<tm1(Mecp2)Jae>	B6.Cg-Mapt<tm1(Mecp2)Jae>	MGI:5318976	hm	impaired coordination
Mapt<tm1(Mecp2)Jae>/Mapt<tm1(Mecp2)Jae>	B6.Cg-Mapt<tm1(Mecp2)Jae>	MGI:5318976	hm	increased anxiety-related response
Mapt<tm1(Mecp2)Jae>/Mapt<tm1(Mecp2)Jae>	B6.Cg-Mapt<tm1(Mecp2)Jae>	MGI:5318976	hm	Lubs X-Linked Mental Retardation Syndrome
Mapt<tm1(Mecp2)Jae>/Mapt<tm1(Mecp2)Jae>	B6.Cg-Mapt<tm1(Mecp2)Jae>	MGI:5318976	hm	reduced long term potentiation
Mapt<tm1(Mecp2)Jae>/Mapt<tm1(Mecp2)Jae>	involves: 129/Sv * C57BL/6	MGI:3043296	hm	abnormal sexual interaction
Mapt<tm1(Mecp2)Jae>/Mapt<tm1(Mecp2)Jae>	involves: 129/Sv * C57BL/6	MGI:3043296	hm	ataxia
Mapt<tm1(Mecp2)Jae>/Mapt<tm1(Mecp2)Jae>	involves: 129/Sv * C57BL/6	MGI:3043296	hm	cachexia
Mapt<tm1(Mecp2)Jae>/Mapt<tm1(Mecp2)Jae>	involves: 129/Sv * C57BL/6	MGI:3043296	hm	cataract
Mapt<tm1(Mecp2)Jae>/Mapt<tm1(Mecp2)Jae>	involves: 129/Sv * C57BL/6	MGI:3043296	hm	disheveled coat
Mapt<tm1(Mecp2)Jae>/Mapt<tm1(Mecp2)Jae>	involves: 129/Sv * C57BL/6	MGI:3043296	hm	excessive scratching
Mapt<tm1(Mecp2)Jae>/Mapt<tm1(Mecp2)Jae>	involves: 129/Sv * C57BL/6	MGI:3043296	hm	impaired balance
Mapt<tm1(Mecp2)Jae>/Mapt<tm1(Mecp2)Jae>	involves: 129/Sv * C57BL/6	MGI:3043296	hm	mortality/aging
Mapt<tm1(Mecp2)Jae>/Mapt<tm1(Mecp2)Jae>	involves: 129/Sv * C57BL/6	MGI:3043296	hm	postnatal growth retardation
Mapt<tm1(Mecp2)Jae>/Mapt<tm1(Mecp2)Jae>	involves: 129/Sv * C57BL/6	MGI:3043296	hm	tremors
Mapt<tm1Noh>/Mapt<tm1Noh>	involves: 129S4/SvJae	MGI:2174969	hm	abnormal axon morphology
Mapt<tm1Noh>/Mapt<tm1Noh>	involves: 129S4/SvJae	MGI:2174969	hm	Alzheimer Disease
Napb<tm1Rhee>/Napb<tm1Rhee>	Not Specified	MGI:4880006	hm	abnormal neuron physiology
Napb<tm1Rhee>/Napb<tm1Rhee>	Not Specified	MGI:4880006	hm	ataxia
Napb<tm1Rhee>/Napb<tm1Rhee>	Not Specified	MGI:4880006	hm	premature death
Napb<tm1Rhee>/Napb<tm1Rhee>	Not Specified	MGI:4880006	hm	seizures
Ncs1<tm1Blt>/Ncs1<tm1Blt>	Not Specified	MGI:3815090	hm	no phenotypic analysis
Ndrg4<tm1Myta>/Ndrg4<tm1Myta>	involves: 129S1/Sv * 129X1/SvJ * C57BL/6	MGI:5287889	hm	abnormal nervous system physiology
Ndrg4<tm1Myta>/Ndrg4<tm1Myta>	involves: 129S1/Sv * 129X1/SvJ * C57BL/6	MGI:5287889	hm	abnormal spatial learning
Ndrg4<tm1Myta>/Ndrg4<tm1Myta>	involves: 129S1/Sv * 129X1/SvJ * C57BL/6	MGI:5287889	hm	increased cerebral infarction size
Ndrg4<tm1Myta>/Ndrg4<tm1Myta>	involves: 129S1/Sv * 129X1/SvJ * C57BL/6	MGI:5287889	hm	increased susceptibility to ischemic brain injury
Ntrk2<tm1Bbd>/Ntrk2<tm1Bbd>	involves: 129S2/SvPas	MGI:3612894	hm	abnormal barrel cortex morphology
Ntrk2<tm1Bbd>/Ntrk2<tm1Bbd>	involves: 129S2/SvPas	MGI:3612894	hm	abnormal cerebellum development
Ntrk2<tm1Bbd>/Ntrk2<tm1Bbd>	involves: 129S2/SvPas	MGI:3612894	hm	abnormal Purkinje cell dendrite morphology
Ntrk2<tm1Bbd>/Ntrk2<tm1Bbd>	involves: 129S2/SvPas	MGI:3612894	hm	abnormal sensory neuron innervation pattern
Ntrk2<tm1Bbd>/Ntrk2<tm1Bbd>	involves: 129S2/SvPas	MGI:3612894	hm	abnormal somatic nervous system morphology
Ntrk2<tm1Bbd>/Ntrk2<tm1Bbd>	involves: 129S2/SvPas	MGI:3612894	hm	complete postnatal lethality
Ntrk2<tm1Bbd>/Ntrk2<tm1Bbd>	involves: 129S2/SvPas	MGI:3612894	hm	small cochlear ganglion
Ntrk2<tm1Bbd>/Ntrk2<tm1Bbd>	involves: 129S2/SvPas	MGI:3612894	hm	small geniculate ganglion
Ntrk2<tm1Bbd>/Ntrk2<tm1Bbd>	involves: 129S2/SvPas	MGI:3612894	hm	small L4 dorsal root ganglion
Ntrk2<tm1Bbd>/Ntrk2<tm1Bbd>	involves: 129S2/SvPas	MGI:3612894	hm	small nodose ganglion
Ntrk2<tm1Bbd>/Ntrk2<tm1Bbd>	involves: 129S2/SvPas	MGI:3612894	hm	small petrosal ganglion
Ntrk2<tm1Bbd>/Ntrk2<tm1Bbd>	involves: 129S2/SvPas	MGI:3612894	hm	small trigeminal ganglion
Ntrk2<tm1Bbd>/Ntrk2<tm1Bbd>	involves: 129S2/SvPas	MGI:3612894	hm	small vestibular ganglion
Ntrk2<tm1Bbd>/Ntrk2<tm1Bbd>	involves: 129S2/SvPas * C57BL/6	MGI:2175187	hm	abnormal cochlear ganglion morphology
Ntrk2<tm1Bbd>/Ntrk2<tm1Bbd>	involves: 129S2/SvPas * C57BL/6	MGI:2175187	hm	abnormal cochlear OHC afferent innervation pattern
Ntrk2<tm1Bbd>/Ntrk2<tm1Bbd>	involves: 129S2/SvPas * C57BL/6	MGI:2175187	hm	abnormal crista ampullaris neuroepithelium morphology
Ntrk2<tm1Bbd>/Ntrk2<tm1Bbd>	involves: 129S2/SvPas * C57BL/6	MGI:2175187	hm	abnormal sensory neuron innervation pattern
Ntrk2<tm1Bbd>/Ntrk2<tm1Bbd>	involves: 129S2/SvPas * C57BL/6	MGI:2175187	hm	abnormal utricular macula morphology
Ntrk2<tm1Bbd>/Ntrk2<tm1Bbd>	involves: 129S2/SvPas * C57BL/6	MGI:2175187	hm	abnormal vestibular ganglion morphology
Ntrk2<tm1Bbd>/Ntrk2<tm1Bbd>	involves: 129S2/SvPas * C57BL/6	MGI:2175187	hm	abnormal vibrissae reflex
Ntrk2<tm1Bbd>/Ntrk2<tm1Bbd>	involves: 129S2/SvPas * C57BL/6	MGI:2175187	hm	decreased motor neuron number
Ntrk2<tm1Bbd>/Ntrk2<tm1Bbd>	involves: 129S2/SvPas * C57BL/6	MGI:2175187	hm	no suckling reflex
Ntrk2<tm1Bbd>/Ntrk2<tm1Bbd>	involves: 129S2/SvPas * C57BL/6	MGI:2175187	hm	no swallowing reflex
Ntrk2<tm1Bbd>/Ntrk2<tm1Bbd>	involves: 129S2/SvPas * C57BL/6	MGI:2175187	hm	partial neonatal lethality
Ntrk2<tm1Bbd>/Ntrk2<tm1Bbd>	involves: 129S2/SvPas * C57BL/6	MGI:2175187	hm	small cochlear ganglion
Ntrk2<tm1Bbd>/Ntrk2<tm1Bbd>	involves: 129S2/SvPas * C57BL/6	MGI:2175187	hm	small dorsal root ganglion
Ntrk2<tm1Bbd>/Ntrk2<tm1Bbd>	involves: 129S2/SvPas * C57BL/6	MGI:2175187	hm	small facial motor nucleus
Ntrk2<tm1Bbd>/Ntrk2<tm1Bbd>	involves: 129S2/SvPas * C57BL/6	MGI:2175187	hm	small trigeminal ganglion
Ntrk2<tm1Bbd>/Ntrk2<tm1Bbd>	involves: 129S2/SvPas * C57BL/6	MGI:2175187	hm	small vestibular ganglion
Ntrk2<tm1Lfp>/Ntrk2<tm1Lfp>	involves: 129	MGI:3612896	hm	abnormal barrel cortex morphology
Ntrk2<tm1Lfp>/Ntrk2<tm1Lfp>	involves: 129	MGI:3612896	hm	abnormal sensory neuron innervation pattern
Ntrk2<tm1Lfp>/Ntrk2<tm1Lfp>	involves: 129 * C57	MGI:3612893	hm	abnormal sensory neuron innervation pattern
Ntrk2<tm1Lfp>/Ntrk2<tm1Lfp>	involves: 129 * C57	MGI:3612893	hm	abnormal somatic nervous system morphology
Ntrk2<tm1Lfp>/Ntrk2<tm1Lfp>	involves: 129 * C57	MGI:3612893	hm	complete postnatal lethality
Ntrk2<tm1Lfp>/Ntrk2<tm1Lfp>	involves: 129 * C57	MGI:3612893	hm	small cochlear ganglion
Ntrk2<tm1Lfp>/Ntrk2<tm1Lfp>	involves: 129 * C57	MGI:3612893	hm	small geniculate ganglion
Ntrk2<tm1Lfp>/Ntrk2<tm1Lfp>	involves: 129 * C57	MGI:3612893	hm	small nodose ganglion
Ntrk2<tm1Lfp>/Ntrk2<tm1Lfp>	involves: 129 * C57	MGI:3612893	hm	small petrosal ganglion
Ntrk2<tm1Lfp>/Ntrk2<tm1Lfp>	involves: 129 * C57	MGI:3612893	hm	small trigeminal ganglion
Ntrk2<tm1Lfp>/Ntrk2<tm1Lfp>	involves: 129 * C57	MGI:3612893	hm	small vestibular ganglion
Ntrk2<tm1Rohr>/Ntrk2<tm1Rohr>	involves: ICR	MGI:3040879	hm	abnormal breathing pattern
Ntrk2<tm1Rohr>/Ntrk2<tm1Rohr>	involves: ICR	MGI:3040879	hm	abnormal eyelid morphology
Ntrk2<tm1Rohr>/Ntrk2<tm1Rohr>	involves: ICR	MGI:3040879	hm	abnormal pupillary reflex
Ntrk2<tm1Rohr>/Ntrk2<tm1Rohr>	involves: ICR	MGI:3040879	hm	abnormal retinal development
Ntrk2<tm1Rohr>/Ntrk2<tm1Rohr>	involves: ICR	MGI:3040879	hm	abnormal retinal rod cell outer segment morphology
Ntrk2<tm1Rohr>/Ntrk2<tm1Rohr>	involves: ICR	MGI:3040879	hm	abnormal rod electrophysiology
Ntrk2<tm1Rohr>/Ntrk2<tm1Rohr>	involves: ICR	MGI:3040879	hm	abnormal vision
Ntrk2<tm1Rohr>/Ntrk2<tm1Rohr>	involves: ICR	MGI:3040879	hm	complete postnatal lethality
Ntrk2<tm1Rohr>/Ntrk2<tm1Rohr>	involves: ICR	MGI:3040879	hm	decreased amacrine cell number
Ntrk2<tm1Rohr>/Ntrk2<tm1Rohr>	involves: ICR	MGI:3040879	hm	decreased body size
Ntrk2<tm1Rohr>/Ntrk2<tm1Rohr>	involves: ICR	MGI:3040879	hm	impaired righting response
Ntrk2<tm1Rohr>/Ntrk2<tm1Rohr>	Not Specified	MGI:3040875	hm	abnormal optic nerve morphology
Ntrk2<tm1Rohr>/Ntrk2<tm1Rohr>	Not Specified	MGI:3040875	hm	abnormal secondary ovarian follicle morphology
Ntrk2<tm1Rohr>/Ntrk2<tm1Rohr>	Not Specified	MGI:3040875	hm	complete postnatal lethality
Ntrk2<tm1Rohr>/Ntrk2<tm1Rohr>	Not Specified	MGI:3040875	hm	decreased body weight
Ntrk2<tm1Rohr>/Ntrk2<tm1Rohr>	Not Specified	MGI:3040875	hm	decreased circulating follicle stimulating hormone level
Ntrk2<tm1Rohr>/Ntrk2<tm1Rohr>	Not Specified	MGI:3040875	hm	impaired granulosa cell differentiation
Ntrk2<tm1Rohr>/Ntrk2<tm1Rohr>	Not Specified	MGI:3040875	hm	impaired ovarian folliculogenesis
Ntrk2<tm2.1Ddg>/Ntrk2<tm2.1Ddg>	involves: 129P2/OlaHsd	MGI:5617024	hm	abnormal sensory neuron innervation pattern
Ntrk2<tm2.1Ddg>/Ntrk2<tm2.1Ddg>	involves: 129S6/SvEvTac	MGI:5617032	hm	abnormal survival
Ntrk2<tm2.1Ddg>/Ntrk2<tm2.1Ddg>	involves: 129S6/SvEvTac * C57BL/6	MGI:5490142	hm	complete neonatal lethality
P4htm<tm1Jomy>/P4htm<tm1Jomy>	Not Specified	MGI:5583843	hm	abnormal eye morphology
P4htm<tm1Jomy>/P4htm<tm1Jomy>	Not Specified	MGI:5583843	hm	increased urine protein level
Pacsin1<tm1.1Bqu>/Pacsin1<tm1.1Bqu>	Not Specified	MGI:5691569	hm	abnormal inhibitory postsynaptic currents
Pacsin1<tm1.1Bqu>/Pacsin1<tm1.1Bqu>	Not Specified	MGI:5691569	hm	abnormal miniature excitatory postsynaptic currents
Pacsin1<tm1.1Bqu>/Pacsin1<tm1.1Bqu>	Not Specified	MGI:5691569	hm	abnormal miniature inhibitory postsynaptic currents
Pacsin1<tm1.1Bqu>/Pacsin1<tm1.1Bqu>	Not Specified	MGI:5691569	hm	abnormal nervous system electrophysiology
Pacsin1<tm1.1Bqu>/Pacsin1<tm1.1Bqu>	Not Specified	MGI:5691569	hm	abnormal retinal outer plexiform layer morphology
Pacsin1<tm1.1Bqu>/Pacsin1<tm1.1Bqu>	Not Specified	MGI:5691569	hm	abnormal synapse morphology
Pacsin1<tm1.1Bqu>/Pacsin1<tm1.1Bqu>	Not Specified	MGI:5691569	hm	abnormal synaptic vesicle morphology
Pacsin1<tm1.1Bqu>/Pacsin1<tm1.1Bqu>	Not Specified	MGI:5691569	hm	abnormal synaptic vesicle number
Pacsin1<tm1.1Bqu>/Pacsin1<tm1.1Bqu>	Not Specified	MGI:5691569	hm	abnormal synaptic vesicle recycling
Pacsin1<tm1.1Bqu>/Pacsin1<tm1.1Bqu>	Not Specified	MGI:5691569	hm	abnormal vesicle-mediated transport
Pacsin1<tm1.1Bqu>/Pacsin1<tm1.1Bqu>	Not Specified	MGI:5691569	hm	decreased body weight
Pacsin1<tm1.1Bqu>/Pacsin1<tm1.1Bqu>	Not Specified	MGI:5691569	hm	decreased excitatory postsynaptic current amplitude
Pacsin1<tm1.1Bqu>/Pacsin1<tm1.1Bqu>	Not Specified	MGI:5691569	hm	decreased synaptic depression
Pacsin1<tm1.1Bqu>/Pacsin1<tm1.1Bqu>	Not Specified	MGI:5691569	hm	increased hippocampus volume
Pacsin1<tm1.1Bqu>/Pacsin1<tm1.1Bqu>	Not Specified	MGI:5691569	hm	mortality/aging
Pacsin1<tm1.1Bqu>/Pacsin1<tm1.1Bqu>	Not Specified	MGI:5691569	hm	reduced fertility
Pacsin1<tm1.1Bqu>/Pacsin1<tm1.1Bqu>	Not Specified	MGI:5691569	hm	tonic-clonic seizures
Pak1<tm1Cher>/Pak1<tm1Cher>	B6.129S2-Pak1<tm1Cher>	MGI:3834754	hm	abnormal mast cell physiology
Pak1<tm1Cher>/Pak1<tm1Cher>	B6.129S2-Pak1<tm1Cher>	MGI:3834754	hm	decreased mast cell degranulation
Pak1<tm1Cher>/Pak1<tm1Cher>	involves: 129S2/SvPas	MGI:5494663	hm	hematopoietic system phenotype
Pak1<tm1Zpj>/Pak1<tm1Zpj>	involves: 129S1/Sv * 129X1/SvJ	MGI:5694245	hm	nervous system phenotype
Pak1<tm1Zpj>/Pak1<tm1Zpj>	involves: 129S1/Sv * 129X1/SvJ	MGI:5694245	hm	reduced long term potentiation
Pitpna<tm1Vab>/Pitpna<tm1Vab>	involves: 129S7/SvEvBrd	MGI:2676370	hm	abnormal abdominal fat pad morphology
Pitpna<tm1Vab>/Pitpna<tm1Vab>	involves: 129S7/SvEvBrd	MGI:2676370	hm	abnormal apoptosis
Pitpna<tm1Vab>/Pitpna<tm1Vab>	involves: 129S7/SvEvBrd	MGI:2676370	hm	abnormal brainstem morphology
Pitpna<tm1Vab>/Pitpna<tm1Vab>	involves: 129S7/SvEvBrd	MGI:2676370	hm	abnormal cerebellum morphology
Pitpna<tm1Vab>/Pitpna<tm1Vab>	involves: 129S7/SvEvBrd	MGI:2676370	hm	abnormal enterocyte morphology
Pitpna<tm1Vab>/Pitpna<tm1Vab>	involves: 129S7/SvEvBrd	MGI:2676370	hm	abnormal hepatocyte morphology
Pitpna<tm1Vab>/Pitpna<tm1Vab>	involves: 129S7/SvEvBrd	MGI:2676370	hm	abnormal inguinal fat pad morphology
Pitpna<tm1Vab>/Pitpna<tm1Vab>	involves: 129S7/SvEvBrd	MGI:2676370	hm	abnormal intestinal epithelium morphology
Pitpna<tm1Vab>/Pitpna<tm1Vab>	involves: 129S7/SvEvBrd	MGI:2676370	hm	abnormal intestinal lipid absorption
Pitpna<tm1Vab>/Pitpna<tm1Vab>	involves: 129S7/SvEvBrd	MGI:2676370	hm	abnormal pancreatic islet morphology
Pitpna<tm1Vab>/Pitpna<tm1Vab>	involves: 129S7/SvEvBrd	MGI:2676370	hm	abnormal Purkinje cell morphology
Pitpna<tm1Vab>/Pitpna<tm1Vab>	involves: 129S7/SvEvBrd	MGI:2676370	hm	abnormal spinal cord morphology
Pitpna<tm1Vab>/Pitpna<tm1Vab>	involves: 129S7/SvEvBrd	MGI:2676370	hm	abnormal spinal cord ventral horn morphology
Pitpna<tm1Vab>/Pitpna<tm1Vab>	involves: 129S7/SvEvBrd	MGI:2676370	hm	abnormal spinal cord white matter morphology
Pitpna<tm1Vab>/Pitpna<tm1Vab>	involves: 129S7/SvEvBrd	MGI:2676370	hm	abnormal vitamin absorption
Pitpna<tm1Vab>/Pitpna<tm1Vab>	involves: 129S7/SvEvBrd	MGI:2676370	hm	ataxia
Pitpna<tm1Vab>/Pitpna<tm1Vab>	involves: 129S7/SvEvBrd	MGI:2676370	hm	Chylomicron Retention Disease
Pitpna<tm1Vab>/Pitpna<tm1Vab>	involves: 129S7/SvEvBrd	MGI:2676370	hm	complete postnatal lethality
Pitpna<tm1Vab>/Pitpna<tm1Vab>	involves: 129S7/SvEvBrd	MGI:2676370	hm	decreased body weight
Pitpna<tm1Vab>/Pitpna<tm1Vab>	involves: 129S7/SvEvBrd	MGI:2676370	hm	decreased circulating glucagon level
Pitpna<tm1Vab>/Pitpna<tm1Vab>	involves: 129S7/SvEvBrd	MGI:2676370	hm	decreased circulating insulin level
Pitpna<tm1Vab>/Pitpna<tm1Vab>	involves: 129S7/SvEvBrd	MGI:2676370	hm	decreased circulating triglyceride level
Pitpna<tm1Vab>/Pitpna<tm1Vab>	involves: 129S7/SvEvBrd	MGI:2676370	hm	decreased glycogen catabolism rate
Pitpna<tm1Vab>/Pitpna<tm1Vab>	involves: 129S7/SvEvBrd	MGI:2676370	hm	decreased pancreatic islet number
Pitpna<tm1Vab>/Pitpna<tm1Vab>	involves: 129S7/SvEvBrd	MGI:2676370	hm	demyelination
Pitpna<tm1Vab>/Pitpna<tm1Vab>	involves: 129S7/SvEvBrd	MGI:2676370	hm	hepatic steatosis
Pitpna<tm1Vab>/Pitpna<tm1Vab>	involves: 129S7/SvEvBrd	MGI:2676370	hm	hypoglycemia
Pitpna<tm1Vab>/Pitpna<tm1Vab>	involves: 129S7/SvEvBrd	MGI:2676370	hm	increased circulating alkaline phosphatase level
Pitpna<tm1Vab>/Pitpna<tm1Vab>	involves: 129S7/SvEvBrd	MGI:2676370	hm	increased circulating aspartate transaminase level
Pitpna<tm1Vab>/Pitpna<tm1Vab>	involves: 129S7/SvEvBrd	MGI:2676370	hm	increased circulating bilirubin level
Pitpna<tm1Vab>/Pitpna<tm1Vab>	involves: 129S7/SvEvBrd	MGI:2676370	hm	increased circulating corticosterone level
Pitpna<tm1Vab>/Pitpna<tm1Vab>	involves: 129S7/SvEvBrd	MGI:2676370	hm	neurodegeneration
Pitpna<tm1Vab>/Pitpna<tm1Vab>	involves: 129S7/SvEvBrd	MGI:2676370	hm	partial neonatal lethality
Pitpna<tm1Vab>/Pitpna<tm1Vab>	involves: 129S7/SvEvBrd	MGI:2676370	hm	postnatal growth retardation
Pitpna<tm1Vab>/Pitpna<tm1Vab>	involves: 129S7/SvEvBrd	MGI:2676370	hm	seizures
Pitpna<tm1Vab>/Pitpna<tm1Vab>	involves: 129S7/SvEvBrd	MGI:2676370	hm	tremors
Ppme1<tm1Crv>/Ppme1<tm1Crv>	involves: 129S6/SvEvTac * C57BL/6J	MGI:3804893	hm	abnormal breathing pattern
Ppme1<tm1Crv>/Ppme1<tm1Crv>	involves: 129S6/SvEvTac * C57BL/6J	MGI:3804893	hm	abnormal enzyme/coenzyme activity
Ppme1<tm1Crv>/Ppme1<tm1Crv>	involves: 129S6/SvEvTac * C57BL/6J	MGI:3804893	hm	abnormal suckling behavior
Ppme1<tm1Crv>/Ppme1<tm1Crv>	involves: 129S6/SvEvTac * C57BL/6J	MGI:3804893	hm	complete neonatal lethality
Prepl<tm1.2Sagh>/Prepl<tm1.2Sagh>	involves: 129S4/SvJae * C57BL/6 * C57BL/6J * Swiss Webster	MGI:5662459	hm	decreased body length
Prepl<tm1.2Sagh>/Prepl<tm1.2Sagh>	involves: 129S4/SvJae * C57BL/6 * C57BL/6J * Swiss Webster	MGI:5662459	hm	decreased body size
Prepl<tm1.2Sagh>/Prepl<tm1.2Sagh>	involves: 129S4/SvJae * C57BL/6 * C57BL/6J * Swiss Webster	MGI:5662459	hm	decreased body weight
Prepl<tm1.2Sagh>/Prepl<tm1.2Sagh>	involves: 129S4/SvJae * C57BL/6 * C57BL/6J * Swiss Webster	MGI:5662459	hm	hypotonia
Prepl<tm1.2Sagh>/Prepl<tm1.2Sagh>	involves: 129S4/SvJae * C57BL/6 * C57BL/6J * Swiss Webster	MGI:5662459	hm	impaired righting response
Prepl<tm1.2Sagh>/Prepl<tm1.2Sagh>	involves: 129S4/SvJae * C57BL/6 * C57BL/6J * Swiss Webster	MGI:5662459	hm	postnatal growth retardation
Prepl<tm1.2Sagh>/Prepl<tm1.2Sagh>	involves: 129S4/SvJae * C57BL/6 * C57BL/6J * Swiss Webster	MGI:5662459	hm	slow postnatal weight gain
Prepl<tm1.2Sagh>/Prepl<tm1.2Sagh>	involves: 129S4/SvJae * C57BL/6 * C57BL/6J * Swiss Webster	MGI:5662459	hm	weakness
Prkar1b<tm1Gsm>/Prkar1b<tm1Gsm>	involves: 129X1/SvJ * C57BL/6	MGI:3041527	hm	behavior/neurological phenotype
Prkar1b<tm1Gsm>/Prkar1b<tm1Gsm>	involves: 129X1/SvJ * C57BL/6	MGI:3041527	hm	nervous system phenotype
Prkar1b<tm1Gsm>/Prkar1b<tm1Gsm>	involves: 129X1/SvJ * C57BL/6	MGI:3041527	hm	reduced long term depression
Prkar1b<tm1Gsm>/Prkar1b<tm1Gsm>	involves: 129X1/SvJ * C57BL/6	MGI:3041527	hm	reduced long term potentiation
Prkar1b<tm1Gsm>/Prkar1b<tm1Gsm>	Not Specified	MGI:3041528	hm	abnormal nociception after inflammation
Prkar1b<tm1Gsm>/Prkar1b<tm1Gsm>	Not Specified	MGI:3041528	hm	behavior/neurological phenotype
Prkar1b<tm1Gsm>/Prkar1b<tm1Gsm>	Not Specified	MGI:3041528	hm	decreased inflammatory response
Prkar1b<tm1Gsm>/Prkar1b<tm1Gsm>	Not Specified	MGI:3041528	hm	increased thermal nociceptive threshold
Rab3a<tm1Sud>/Rab3a<tm1Sud>	involves: 129	MGI:3625934	hm	no abnormal phenotype detected
Rab3a<tm1Sud>/Rab3a<tm1Sud>	involves: 129 * C57BL/6J	MGI:2388814	hm	shortened circadian period
Rab3a<tm1Sud>/Rab3a<tm1Sud>	involves: 129/Sv	MGI:2179734	hm	increased synaptic depression
Rab3c<tm1Sud>/Rab3c<tm1Sud>	involves: 129P2/OlaHsd	MGI:3625936	hm	no abnormal phenotype detected
Rbfox3<tm1a(EUCOMM)Hmgu>/Rbfox3<tm1a(EUCOMM)Hmgu>	Not Specified	MGI:5450637	hm	decreased circulating alkaline phosphatase level
Rbfox3<tm1a(EUCOMM)Hmgu>/Rbfox3<tm1a(EUCOMM)Hmgu>	Not Specified	MGI:5450637	hm	decreased grip strength
Rbfox3<tm1a(EUCOMM)Hmgu>/Rbfox3<tm1a(EUCOMM)Hmgu>	Not Specified	MGI:5450637	hm	decreased thermal nociceptive threshold
Rbfox3<tm1a(EUCOMM)Hmgu>/Rbfox3<tm1a(EUCOMM)Hmgu>	Not Specified	MGI:5450637	hm	increased startle reflex
Sept3<tm1Keng>/Sept3<tm1Keng>	involves: C57BL/6 * CBA	MGI:3715620	hm	nervous system phenotype
Sept3<tm1Wtr>/Sept3<tm1Wtr>	involves: 129S1/Sv * 129X1/SvJ * CD-1	MGI:3822553	hm	nervous system phenotype
Sept8<tm1a(EUCOMM)Wtsi>/Sept8<tm1a(EUCOMM)Wtsi>	Not Specified	MGI:5450647	hm	abnormal locomotor activation
Sept8<tm1a(EUCOMM)Wtsi>/Sept8<tm1a(EUCOMM)Wtsi>	Not Specified	MGI:5450647	hm	decreased body weight
Sept8<tm1a(EUCOMM)Wtsi>/Sept8<tm1a(EUCOMM)Wtsi>	Not Specified	MGI:5450647	hm	decreased grip strength
Sept8<tm1a(EUCOMM)Wtsi>/Sept8<tm1a(EUCOMM)Wtsi>	Not Specified	MGI:5450647	hm	decreased NK cell number
Sept8<tm1a(EUCOMM)Wtsi>/Sept8<tm1a(EUCOMM)Wtsi>	Not Specified	MGI:5450647	hm	increased B cell number
Sept8<tm1a(EUCOMM)Wtsi>/Sept8<tm1a(EUCOMM)Wtsi>	Not Specified	MGI:5450647	hm	increased circulating alkaline phosphatase level
Sept8<tm1a(EUCOMM)Wtsi>/Sept8<tm1a(EUCOMM)Wtsi>	Not Specified	MGI:5450647	hm	increased circulating aspartate transaminase level
Sept8<tm1a(EUCOMM)Wtsi>/Sept8<tm1a(EUCOMM)Wtsi>	Not Specified	MGI:5450647	hm	increased lactate dehydrogenase level
Sept8<tm1a(EUCOMM)Wtsi>/Sept8<tm1a(EUCOMM)Wtsi>	Not Specified	MGI:5450647	hm	increased mature B cell number
Serpini1<tm1Dpw>/Serpini1<tm1Dpw>	involves: 129/Sv * C57BL/6JBom	MGI:2669541	hm	abnormal anxiety-related response
Serpini1<tm1Dpw>/Serpini1<tm1Dpw>	involves: 129/Sv * C57BL/6JBom	MGI:2669541	hm	abnormal motor capabilities/coordination/movement
Serpini1<tm1Dpw>/Serpini1<tm1Dpw>	involves: 129/Sv * C57BL/6JBom	MGI:2669541	hm	abnormal response to novelty
Serpini1<tm1Dpw>/Serpini1<tm1Dpw>	involves: 129/Sv * C57BL/6JBom	MGI:2669541	hm	decreased exploration in new environment
Serpini1<tm1Dpw>/Serpini1<tm1Dpw>	involves: 129/Sv * C57BL/6JBom	MGI:2669541	hm	Encephalopathy, Familial, with Neuroserpin Inclusion Bodies
Sh3gl2<tm1Pdc>/Sh3gl2<tm1Pdc>	involves: 129	MGI:5468822	hm	no abnormal phenotype detected
Slc4a10<tm1.1Cahb>/Slc4a10<tm1.1Cahb>	involves: 129S1/Sv * 129X1/SvJ * C57BL/6	MGI:3798854	hm	abnormal brain ventricle morphology
Slc4a10<tm1.1Cahb>/Slc4a10<tm1.1Cahb>	involves: 129S1/Sv * 129X1/SvJ * C57BL/6	MGI:3798854	hm	abnormal choroid plexus morphology
Slc4a10<tm1.1Cahb>/Slc4a10<tm1.1Cahb>	involves: 129S1/Sv * 129X1/SvJ * C57BL/6	MGI:3798854	hm	abnormal neuron physiology
Slc4a10<tm1.1Cahb>/Slc4a10<tm1.1Cahb>	involves: 129S1/Sv * 129X1/SvJ * C57BL/6	MGI:3798854	hm	abnormal pH regulation
Slc4a10<tm1.1Cahb>/Slc4a10<tm1.1Cahb>	involves: 129S1/Sv * 129X1/SvJ * C57BL/6	MGI:3798854	hm	abnormal response to new environment
Slc4a10<tm1.1Cahb>/Slc4a10<tm1.1Cahb>	involves: 129S1/Sv * 129X1/SvJ * C57BL/6	MGI:3798854	hm	abnormal response to novel object
Slc4a10<tm1.1Cahb>/Slc4a10<tm1.1Cahb>	involves: 129S1/Sv * 129X1/SvJ * C57BL/6	MGI:3798854	hm	decreased anxiety-related response
Slc4a10<tm1.1Cahb>/Slc4a10<tm1.1Cahb>	involves: 129S1/Sv * 129X1/SvJ * C57BL/6	MGI:3798854	hm	decreased susceptibility to pharmacologically induced seizures
Slc4a10<tm1.1Cahb>/Slc4a10<tm1.1Cahb>	involves: 129S1/Sv * 129X1/SvJ * C57BL/6	MGI:3798854	hm	premature death
Slc4a10<tm1.1Cahb>/Slc4a10<tm1.1Cahb>	involves: 129S1/Sv * 129X1/SvJ * C57BL/6	MGI:3798854	hm	slow postnatal weight gain
Slitrk1<tm1.1(KOMP)Vlcg>/Slitrk1<tm1.1(KOMP)Vlcg>	C57BL/6N-Slitrk1<tm1.1(KOMP)Vlcg>/Ucd	MGI:5700996	hm	decreased circulating cholesterol level
Slitrk1<tm1.1(KOMP)Vlcg>/Slitrk1<tm1.1(KOMP)Vlcg>	C57BL/6N-Slitrk1<tm1.1(KOMP)Vlcg>/Ucd	MGI:5700996	hm	improved glucose tolerance
Slitrk1<tm1Jaru>/Slitrk1<tm1Jaru>	B6.129P2-Slitrk1<tm1Jaru>	MGI:3834579	hm	abnormal nervous system physiology
Slitrk1<tm1Jaru>/Slitrk1<tm1Jaru>	B6.129P2-Slitrk1<tm1Jaru>	MGI:3834579	hm	abnormal noradrenaline level
Slitrk1<tm1Jaru>/Slitrk1<tm1Jaru>	B6.129P2-Slitrk1<tm1Jaru>	MGI:3834579	hm	decreased body weight
Slitrk1<tm1Jaru>/Slitrk1<tm1Jaru>	B6.129P2-Slitrk1<tm1Jaru>	MGI:3834579	hm	decreased coping response
Slitrk1<tm1Jaru>/Slitrk1<tm1Jaru>	B6.129P2-Slitrk1<tm1Jaru>	MGI:3834579	hm	decreased survivor rate
Slitrk1<tm1Jaru>/Slitrk1<tm1Jaru>	B6.129P2-Slitrk1<tm1Jaru>	MGI:3834579	hm	Gilles De La Tourette Syndrome
Slitrk1<tm1Jaru>/Slitrk1<tm1Jaru>	B6.129P2-Slitrk1<tm1Jaru>	MGI:3834579	hm	hypoactivity
Slitrk1<tm1Jaru>/Slitrk1<tm1Jaru>	B6.129P2-Slitrk1<tm1Jaru>	MGI:3834579	hm	increased anxiety-related response
Slitrk1<tm1Jaru>/Slitrk1<tm1Jaru>	B6.129P2-Slitrk1<tm1Jaru>	MGI:3834579	hm	increased fear-related response
Slitrk1<tm1Jaru>/Slitrk1<tm1Jaru>	B6.129P2-Slitrk1<tm1Jaru>	MGI:3834579	hm	nervous system phenotype
Slitrk1<tm1Jaru>/Slitrk1<tm1Jaru>	B6.129P2-Slitrk1<tm1Jaru>	MGI:3834579	hm	partial postnatal lethality
Snap25<tm1Mcw>/Snap25<tm1Mcw>	involves: C57BL/6	MGI:2181761	hm	abnormal blood vessel morphology
Snap25<tm1Mcw>/Snap25<tm1Mcw>	involves: C57BL/6	MGI:2181761	hm	abnormal brain morphology
Snap25<tm1Mcw>/Snap25<tm1Mcw>	involves: C57BL/6	MGI:2181761	hm	abnormal cerebral cortex morphology
Snap25<tm1Mcw>/Snap25<tm1Mcw>	involves: C57BL/6	MGI:2181761	hm	abnormal CNS synaptic transmission
Snap25<tm1Mcw>/Snap25<tm1Mcw>	involves: C57BL/6	MGI:2181761	hm	abnormal endplate potential
Snap25<tm1Mcw>/Snap25<tm1Mcw>	involves: C57BL/6	MGI:2181761	hm	abnormal intercostal muscle morphology
Snap25<tm1Mcw>/Snap25<tm1Mcw>	involves: C57BL/6	MGI:2181761	hm	abnormal miniature excitatory postsynaptic currents
Snap25<tm1Mcw>/Snap25<tm1Mcw>	involves: C57BL/6	MGI:2181761	hm	abnormal PNS synaptic transmission
Snap25<tm1Mcw>/Snap25<tm1Mcw>	involves: C57BL/6	MGI:2181761	hm	abnormal skin condition
Snap25<tm1Mcw>/Snap25<tm1Mcw>	involves: C57BL/6	MGI:2181761	hm	blotchy skin
Snap25<tm1Mcw>/Snap25<tm1Mcw>	involves: C57BL/6	MGI:2181761	hm	complete neonatal lethality
Snap25<tm1Mcw>/Snap25<tm1Mcw>	involves: C57BL/6	MGI:2181761	hm	decreased embryo size
Snap25<tm1Mcw>/Snap25<tm1Mcw>	involves: C57BL/6	MGI:2181761	hm	no spontaneous movement
Snap25<tm1Mcw>/Snap25<tm1Mcw>	involves: C57BL/6	MGI:2181761	hm	respiratory failure
Snap25<tm1Mcw>/Snap25<tm1Mcw>	involves: C57BL/6	MGI:2181761	hm	thin diaphragm muscle
Snap25<tm1Mcw>/Snap25<tm1Mcw>	involves: C57BL/6	MGI:2181761	hm	unresponsive to tactile stimuli
Snap47<tm1a(EUCOMM)Wtsi>/Snap47<tm1a(EUCOMM)Wtsi>	C57BL/6N-Snap47<tm1a(EUCOMM)Wtsi>/Wtsi	MGI:5608397	hm	decreased lean body mass
Snap47<tm1a(EUCOMM)Wtsi>/Snap47<tm1a(EUCOMM)Wtsi>	C57BL/6N-Snap47<tm1a(EUCOMM)Wtsi>/Wtsi	MGI:5608397	hm	increased lean body mass
Snap47<tm1a(EUCOMM)Wtsi>/Snap47<tm1a(EUCOMM)Wtsi>	C57BL/6N-Snap47<tm1a(EUCOMM)Wtsi>/Wtsi	MGI:5608397	hm	increased total body fat amount
Snap47<tm1a(EUCOMM)Wtsi>/Snap47<tm1a(EUCOMM)Wtsi>	Not Specified	MGI:5450354	hm	increased bone mineral content
Snap47<tm1a(EUCOMM)Wtsi>/Snap47<tm1a(EUCOMM)Wtsi>	Not Specified	MGI:5450354	hm	increased bone mineral density
Snap47<tm1a(EUCOMM)Wtsi>/Snap47<tm1a(EUCOMM)Wtsi>	Not Specified	MGI:5450354	hm	increased mean platelet volume
Sncb<tm1.1Sud>/Sncb<tm1.1Sud>	involves: 129S1/Sv * 129X1/SvJ	MGI:3511216	hm	no abnormal phenotype detected
Snrpn<tm1Cbr>/Snrpn<tm1Cbr>	involves: 129S1/Sv * C57BL/6	MGI:3618141	hm	no abnormal phenotype detected
Snrpn<tm3Alb>/Snrpn<tm3Alb>	either: (involves: 129S7/SvEvBrd) or (involves: 129S7/SvEvBrd * C57BL/6J)	MGI:3662889	hm	no abnormal phenotype detected
Sorcs3<tm1.1Tew>/Sorcs3<tm1.1Tew>	B6N.Cg-Sorcs3<tm1.1Tew>	MGI:5562420	hm	abnormal spatial working memory
Sorcs3<tm1.1Tew>/Sorcs3<tm1.1Tew>	B6N.Cg-Sorcs3<tm1.1Tew>	MGI:5562420	hm	absent long term depression
Sorcs3<tm1.1Tew>/Sorcs3<tm1.1Tew>	B6N.Cg-Sorcs3<tm1.1Tew>	MGI:5562420	hm	behavior/neurological phenotype
Sorcs3<tm1.1Tew>/Sorcs3<tm1.1Tew>	B6N.Cg-Sorcs3<tm1.1Tew>	MGI:5562420	hm	impaired avoidance learning behavior
Sorcs3<tm1.1Tew>/Sorcs3<tm1.1Tew>	B6N.Cg-Sorcs3<tm1.1Tew>	MGI:5562420	hm	impaired spatial learning
Sorcs3<tm1.1Tew>/Sorcs3<tm1.1Tew>	B6N.Cg-Sorcs3<tm1.1Tew>	MGI:5562420	hm	nervous system phenotype
Spock1<tm1Htmn>/Spock1<tm1Htmn>	involves: 129P2/OlaHsd * C57BL/6	MGI:3690727	hm	no abnormal phenotype detected
Stx1b<tm1.1Sud>/Stx1b<tm1.1Sud>	involves: 129S1/Sv * 129X1/SvJ * C57BL/6	MGI:3832395	hm	abnormal adrenal chromaffin cell morphology
Stx1b<tm1.1Sud>/Stx1b<tm1.1Sud>	involves: 129S1/Sv * 129X1/SvJ * C57BL/6	MGI:3832395	hm	abnormal CNS synaptic transmission
Stx1b<tm1.1Sud>/Stx1b<tm1.1Sud>	involves: 129S1/Sv * 129X1/SvJ * C57BL/6	MGI:3832395	hm	abnormal excitatory postsynaptic currents
Stx1b<tm1.1Sud>/Stx1b<tm1.1Sud>	involves: 129S1/Sv * 129X1/SvJ * C57BL/6	MGI:3832395	hm	abnormal miniature excitatory postsynaptic currents
Stx1b<tm1.1Sud>/Stx1b<tm1.1Sud>	involves: 129S1/Sv * 129X1/SvJ * C57BL/6	MGI:3832395	hm	abnormal neuron physiology
Stx1b<tm1.1Sud>/Stx1b<tm1.1Sud>	involves: 129S1/Sv * 129X1/SvJ * C57BL/6	MGI:3832395	hm	abnormal synaptic vesicle recycling
Stx1b<tm1.1Sud>/Stx1b<tm1.1Sud>	involves: 129S1/Sv * 129X1/SvJ * C57BL/6	MGI:3832395	hm	ataxia
Stx1b<tm1.1Sud>/Stx1b<tm1.1Sud>	involves: 129S1/Sv * 129X1/SvJ * C57BL/6	MGI:3832395	hm	premature death
Stx1b<tm1.1Sud>/Stx1b<tm1.1Sud>	involves: 129S1/Sv * 129X1/SvJ * C57BL/6	MGI:3832395	hm	seizures
Stx1b<tm1Tmis>/Stx1b<tm1Tmis>	B6.Cg-Stx1b<tm1Tmis>	MGI:5605504	hm	abnormal AMPA-mediated synaptic currents
Stx1b<tm1Tmis>/Stx1b<tm1Tmis>	B6.Cg-Stx1b<tm1Tmis>	MGI:5605504	hm	abnormal CNS synaptic transmission
Stx1b<tm1Tmis>/Stx1b<tm1Tmis>	B6.Cg-Stx1b<tm1Tmis>	MGI:5605504	hm	abnormal GABA-mediated receptor currents
Stx1b<tm1Tmis>/Stx1b<tm1Tmis>	B6.Cg-Stx1b<tm1Tmis>	MGI:5605504	hm	abnormal miniature excitatory postsynaptic currents
Stx1b<tm1Tmis>/Stx1b<tm1Tmis>	B6.Cg-Stx1b<tm1Tmis>	MGI:5605504	hm	abnormal miniature inhibitory postsynaptic currents
Stx1b<tm1Tmis>/Stx1b<tm1Tmis>	B6.Cg-Stx1b<tm1Tmis>	MGI:5605504	hm	abnormal paired-pulse inhibition
Stx1b<tm1Tmis>/Stx1b<tm1Tmis>	B6.Cg-Stx1b<tm1Tmis>	MGI:5605504	hm	abnormal synapse morphology
Stx1b<tm1Tmis>/Stx1b<tm1Tmis>	B6.Cg-Stx1b<tm1Tmis>	MGI:5605504	hm	abnormal synaptic vesicle number
Stx1b<tm1Tmis>/Stx1b<tm1Tmis>	B6.Cg-Stx1b<tm1Tmis>	MGI:5605504	hm	abnormal synaptic vesicle recycling
Stx1b<tm1Tmis>/Stx1b<tm1Tmis>	B6.Cg-Stx1b<tm1Tmis>	MGI:5605504	hm	complete postnatal lethality
Stx1b<tm1Tmis>/Stx1b<tm1Tmis>	B6.Cg-Stx1b<tm1Tmis>	MGI:5605504	hm	decreased body size
Stxbp1<tm1Sud>/Stxbp1<tm1Sud>	Not Specified	MGI:3033207	hm	abnormal neurotransmitter secretion
Stxbp1<tm1Sud>/Stxbp1<tm1Sud>	Not Specified	MGI:3033207	hm	abnormal synaptic transmission
Stxbp1<tm1Sud>/Stxbp1<tm1Sud>	Not Specified	MGI:3033207	hm	axon degeneration
Stxbp1<tm1Sud>/Stxbp1<tm1Sud>	Not Specified	MGI:3033207	hm	complete neonatal lethality
Stxbp1<tm1Sud>/Stxbp1<tm1Sud>	Not Specified	MGI:3033207	hm	nervous system phenotype
Stxbp1<tm1Sud>/Stxbp1<tm1Sud>	Not Specified	MGI:3033207	hm	neurodegeneration
Stxbp1<tm1Sud>/Stxbp1<tm1Sud>	Not Specified	MGI:3033207	hm	neuron degeneration
Sv2a<tm1Baj>/Sv2a<tm1Baj>	involves: 129X1/SvJ * C57BL/6	MGI:3718040	hm	abnormal cell physiology
Sv2a<tm1Baj>/Sv2a<tm1Baj>	involves: 129X1/SvJ * C57BL/6	MGI:3718040	hm	decreased body size
Sv2a<tm1Baj>/Sv2a<tm1Baj>	involves: 129X1/SvJ * C57BL/6	MGI:3718040	hm	seizures
Sv2a<tm1Baj>/Sv2a<tm1Baj>	Not Specified	MGI:2180206	hm	abnormal inhibitory postsynaptic currents
Sv2a<tm1Baj>/Sv2a<tm1Baj>	Not Specified	MGI:2180206	hm	complete postnatal lethality
Sv2a<tm1Baj>/Sv2a<tm1Baj>	Not Specified	MGI:2180206	hm	nervous system phenotype
Sv2a<tm1Baj>/Sv2a<tm1Baj>	Not Specified	MGI:2180206	hm	postnatal growth retardation
Sv2a<tm1Baj>/Sv2a<tm1Baj>	Not Specified	MGI:2180206	hm	seizures
Sv2a<tm1Sud>/Sv2a<tm1Sud>	involves: 129P2/OlaHsd * C57BL/6	MGI:2180320	hm	complete postnatal lethality
Sv2a<tm1Sud>/Sv2a<tm1Sud>	involves: 129P2/OlaHsd * C57BL/6	MGI:2180320	hm	nervous system phenotype
Sv2a<tm1Sud>/Sv2a<tm1Sud>	involves: 129P2/OlaHsd * C57BL/6	MGI:2180320	hm	partial neonatal lethality
Sv2a<tm1Sud>/Sv2a<tm1Sud>	involves: 129P2/OlaHsd * C57BL/6	MGI:2180320	hm	postnatal growth retardation
Sv2a<tm1Sud>/Sv2a<tm1Sud>	involves: 129P2/OlaHsd * C57BL/6	MGI:2180320	hm	seizures
Svop<tm1.1Baj>/Svop<tm1.1Baj>	involves: 129S4/SvJaeSor * 129S6/SvEvTac * C57BL/6Ncr	MGI:5544579	hm	no abnormal phenotype detected
Syn1<tm1Noh>/Syn1<tm1Noh>	involves: 129S4/SvJae	MGI:3719398	hm	abnormal CNS synapse formation
Syn1<tm1Noh>/Syn1<tm1Noh>	involves: 129S4/SvJae	MGI:3719398	hm	abnormal synaptic vesicle clustering
Syn1<tm1Noh>/Syn1<tm1Noh>	involves: 129S4/SvJae * C57BL/6	MGI:3719351	hm	abnormal inhibitory postsynaptic currents
Syn1<tm1Noh>/Syn1<tm1Noh>	involves: 129S4/SvJae * C57BL/6	MGI:3719351	hm	abnormal synaptic vesicle clustering
Syn1<tm1Noh>/Syn1<tm1Noh>	involves: 129S4/SvJae * C57BL/6	MGI:3719351	hm	abnormal synaptic vesicle recycling
Syn1<tm1Pggd>/Syn1<tm1Pggd>	B6.129P2-Syn1<tm1Pggd>	MGI:5517482	hm	abnormal emotion/affect behavior
Syn1<tm1Pggd>/Syn1<tm1Pggd>	B6.129P2-Syn1<tm1Pggd>	MGI:5517482	hm	abnormal social investigation
Syn1<tm1Pggd>/Syn1<tm1Pggd>	B6.129P2-Syn1<tm1Pggd>	MGI:5517482	hm	Autism
Syn1<tm1Pggd>/Syn1<tm1Pggd>	B6.129P2-Syn1<tm1Pggd>	MGI:5517482	hm	Epilepsy, X-Linked, with Variable Learning Disabilities and Behavior Disorders
Syn1<tm1Pggd>/Syn1<tm1Pggd>	B6.129P2-Syn1<tm1Pggd>	MGI:5517482	hm	impaired social transmission of food preference
Syn1<tm1Pggd>/Syn1<tm1Pggd>	B6.129P2-Syn1<tm1Pggd>	MGI:5517482	hm	increased aggression towards mice
Syn1<tm1Pggd>/Syn1<tm1Pggd>	B6.129P2-Syn1<tm1Pggd>	MGI:5517482	hm	taste/olfaction phenotype
Syn1<tm1Pggd>/Syn1<tm1Pggd>	involves: 129/Sv	MGI:3032587	hm	abnormal excitatory postsynaptic potential
Syn1<tm1Pggd>/Syn1<tm1Pggd>	involves: 129/Sv	MGI:3032587	hm	abnormal hippocampus pyramidal cell morphology
Syn1<tm1Pggd>/Syn1<tm1Pggd>	involves: 129/Sv	MGI:3032587	hm	abnormal neurotransmitter secretion
Syn1<tm1Pggd>/Syn1<tm1Pggd>	involves: 129/Sv	MGI:3032587	hm	abnormal seizure response to electrical stimulation
Syn1<tm1Pggd>/Syn1<tm1Pggd>	involves: 129/Sv	MGI:3032587	hm	abnormal synaptic vesicle clustering
Syn1<tm1Pggd>/Syn1<tm1Pggd>	involves: 129/Sv	MGI:3032587	hm	delayed CNS synapse formation
Syn1<tm1Pggd>/Syn1<tm1Pggd>	involves: 129/Sv	MGI:3032587	hm	increased synaptic depression
Syn1<tm1Sud>/Syn1<tm1Sud>	involves: 129S7/SvEvBrd	MGI:3032586	hm	convulsive seizures
Syn1<tm1Sud>/Syn1<tm1Sud>	involves: 129S7/SvEvBrd	MGI:3032586	hm	enhanced paired-pulse facilitation
Syn1<tm2Noh>/Syn1<tm2Noh>	involves: 129S4/SvJae	MGI:3719399	hm	abnormal CNS synapse formation
Syn1<tm2Noh>/Syn1<tm2Noh>	involves: 129S4/SvJae	MGI:3719399	hm	abnormal synaptic vesicle clustering
Syn2<tm1Pggd>/Syn2<tm1Pggd>	B6.1129-Syn2<tm1Pggd>	MGI:5517484	hm	abnormal emotion/affect behavior
Syn2<tm1Pggd>/Syn2<tm1Pggd>	B6.1129-Syn2<tm1Pggd>	MGI:5517484	hm	abnormal short term object recognition memory
Syn2<tm1Pggd>/Syn2<tm1Pggd>	B6.1129-Syn2<tm1Pggd>	MGI:5517484	hm	abnormal social investigation
Syn2<tm1Pggd>/Syn2<tm1Pggd>	B6.1129-Syn2<tm1Pggd>	MGI:5517484	hm	Autism
Syn2<tm1Pggd>/Syn2<tm1Pggd>	B6.1129-Syn2<tm1Pggd>	MGI:5517484	hm	increased aggression towards mice
Syn2<tm1Pggd>/Syn2<tm1Pggd>	B6.1129-Syn2<tm1Pggd>	MGI:5517484	hm	increased grooming behavior
Syn2<tm1Pggd>/Syn2<tm1Pggd>	B6.1129-Syn2<tm1Pggd>	MGI:5517484	hm	taste/olfaction phenotype
Syn2<tm1Pggd>/Syn2<tm1Pggd>	Not Specified	MGI:3045985	hm	abnormal brain morphology
Syn2<tm1Pggd>/Syn2<tm1Pggd>	Not Specified	MGI:3045985	hm	abnormal CNS synaptic transmission
Syn2<tm1Pggd>/Syn2<tm1Pggd>	Not Specified	MGI:3045985	hm	abnormal excitatory postsynaptic potential
Syn2<tm1Pggd>/Syn2<tm1Pggd>	Not Specified	MGI:3045985	hm	abnormal hippocampus physiology
Syn2<tm1Pggd>/Syn2<tm1Pggd>	Not Specified	MGI:3045985	hm	abnormal miniature excitatory postsynaptic currents
Syn2<tm1Pggd>/Syn2<tm1Pggd>	Not Specified	MGI:3045985	hm	abnormal neuron morphology
Syn2<tm1Pggd>/Syn2<tm1Pggd>	Not Specified	MGI:3045985	hm	abnormal synaptic vesicle number
Syn2<tm1Pggd>/Syn2<tm1Pggd>	Not Specified	MGI:3045985	hm	decreased brain weight
Syn2<tm1Pggd>/Syn2<tm1Pggd>	Not Specified	MGI:3045985	hm	decreased synaptic depression
Syn2<tm1Pggd>/Syn2<tm1Pggd>	Not Specified	MGI:3045985	hm	delayed CNS synapse formation
Syn2<tm1Pggd>/Syn2<tm1Pggd>	Not Specified	MGI:3045985	hm	seizures
Syn2<tm1Sud>/Syn2<tm1Sud>	involves: 129S7/SvEvBrd	MGI:3032601	hm	abnormal CNS synaptic transmission
Syn2<tm1Sud>/Syn2<tm1Sud>	involves: 129S7/SvEvBrd	MGI:3032601	hm	convulsive seizures
Syn2<tm1Sud>/Syn2<tm1Sud>	involves: 129S7/SvEvBrd	MGI:3032601	hm	decreased post-tetanic potentiation
Syn2<tm1Sud>/Syn2<tm1Sud>	involves: 129S7/SvEvBrd	MGI:3032601	hm	increased synaptic depression
Syngr1<tm1Sud>/Syngr1<tm1Sud>	involves: 129S6/SvEvTac * C57BL/6	MGI:2180498	hm	decreased post-tetanic potentiation
Syngr1<tm1Sud>/Syngr1<tm1Sud>	involves: 129S6/SvEvTac * C57BL/6	MGI:2180498	hm	impaired synaptic plasticity
Synj1<tm1Pdc>/Synj1<tm1Pdc>	involves: 129S1/Sv * C57BL/6	MGI:2181801	hm	ataxia
Synj1<tm1Pdc>/Synj1<tm1Pdc>	involves: 129S1/Sv * C57BL/6	MGI:2181801	hm	complete postnatal lethality
Synj1<tm1Pdc>/Synj1<tm1Pdc>	involves: 129S1/Sv * C57BL/6	MGI:2181801	hm	convulsive seizures
Synj1<tm1Pdc>/Synj1<tm1Pdc>	involves: 129S1/Sv * C57BL/6	MGI:2181801	hm	increased synaptic depression
Synj1<tm1Pdc>/Synj1<tm1Pdc>	involves: 129S1/Sv * C57BL/6	MGI:2181801	hm	partial neonatal lethality
Synj1<tm1Pdc>/Synj1<tm1Pdc>	involves: 129S1/Sv * C57BL/6	MGI:2181801	hm	postnatal growth retardation
Synj1<tm1Pdc>/Synj1<tm1Pdc>	involves: 129S1/Sv * C57BL/6	MGI:2181801	hm	weakness
Syp<tm1Leu>/Syp<tm1Leu>	involves: 129S1/Sv * 129X1/SvJ * C57BL/6	MGI:3034040	hm	no abnormal phenotype detected
Syp<tm1Sud>/Syp<tm1Sud>	involves: 129S1/Sv * 129X1/SvJ	MGI:2179742	hm	no abnormal phenotype detected
Thy1<tm1Kak>/Thy1<tm1Kak>	either: (involves: 129S4/SvJae * C57BL/6) or (involves: 129X1/SvJ * C57BL/6)	MGI:3526652	hm	nervous system phenotype
Thy1<tm1Kak>/Thy1<tm1Kak>	either: (involves: 129S4/SvJae * C57BL/6) or (involves: 129X1/SvJ * C57BL/6)	MGI:3526652	hm	no abnormal phenotype detected
Thy1<tm1Rjmo>/Thy1<tm1Rjmo>	involves: 129/Sv * C57BL/6	MGI:3589777	hm	pulmonary fibrosis
Thy1<tm1Rjmo>/Thy1<tm1Rjmo>	involves: 129/Sv * C57BL/6	MGI:3589777	hm	reduced long term potentiation
Trim32<tm1Hdin>/Trim32<tm1Hdin>	involves: 129S1/Sv	MGI:5425913	hm	abnormal muscle physiology
Trim32<tm1Hdin>/Trim32<tm1Hdin>	involves: 129S1/Sv	MGI:5425913	hm	abnormal physiological response to xenobiotic
Trim32<tm1Hdin>/Trim32<tm1Hdin>	involves: 129S1/Sv	MGI:5425913	hm	abnormal skeletal muscle morphology
Trim32<tm1Hdin>/Trim32<tm1Hdin>	involves: 129S1/Sv	MGI:5425913	hm	centrally nucleated skeletal muscle fibers
Trim32<tm1Hdin>/Trim32<tm1Hdin>	involves: 129S1/Sv	MGI:5425913	hm	impaired skeletal muscle regeneration
Trim32<tm1Hdin>/Trim32<tm1Hdin>	involves: 129S1/Sv	MGI:5425913	hm	increased satellite cell number
Trim32<tm1Hdin>/Trim32<tm1Hdin>	involves: 129S1/Sv	MGI:5425913	hm	myopathy
Trio<tm1Mst>/Trio<tm1Mst>	involves: 129S4/SvJae * BALB/c	MGI:2655446	hm	abnormal dentate gyrus morphology
Trio<tm1Mst>/Trio<tm1Mst>	involves: 129S4/SvJae * BALB/c	MGI:2655446	hm	abnormal myogenesis
Trio<tm1Mst>/Trio<tm1Mst>	involves: 129S4/SvJae * BALB/c	MGI:2655446	hm	abnormal neuronal migration
Trio<tm1Mst>/Trio<tm1Mst>	involves: 129S4/SvJae * BALB/c	MGI:2655446	hm	abnormal olfactory bulb morphology
Trio<tm1Mst>/Trio<tm1Mst>	involves: 129S4/SvJae * BALB/c	MGI:2655446	hm	abnormal skeletal muscle fiber morphology
Trio<tm1Mst>/Trio<tm1Mst>	involves: 129S4/SvJae * BALB/c	MGI:2655446	hm	abnormal skeletal muscle morphology
Trio<tm1Mst>/Trio<tm1Mst>	involves: 129S4/SvJae * BALB/c	MGI:2655446	hm	complete perinatal lethality
Trio<tm1Mst>/Trio<tm1Mst>	involves: 129S4/SvJae * BALB/c	MGI:2655446	hm	partial lethality throughout fetal growth and development
Tubg2<tm1Sts>/Tubg2<tm1Sts>	involves: 129S4/SvJae * C57BL/6J	MGI:3583718	hm	no abnormal phenotype detected
Vgf<tm1Srjs>/Vgf<tm1Srjs>	B6.129-Vgf<tm1Srjs>	MGI:3828159	hm	abnormal contextual conditioning behavior
Vgf<tm1Srjs>/Vgf<tm1Srjs>	B6.129-Vgf<tm1Srjs>	MGI:3828159	hm	abnormal metabolism
Vgf<tm1Srjs>/Vgf<tm1Srjs>	B6.129-Vgf<tm1Srjs>	MGI:3828159	hm	abnormal spatial learning
Vgf<tm1Srjs>/Vgf<tm1Srjs>	B6.129-Vgf<tm1Srjs>	MGI:3828159	hm	behavior/neurological phenotype
Vgf<tm1Srjs>/Vgf<tm1Srjs>	B6.129-Vgf<tm1Srjs>	MGI:3828159	hm	decreased body size
Vgf<tm1Srjs>/Vgf<tm1Srjs>	B6.129-Vgf<tm1Srjs>	MGI:3828159	hm	decreased total body fat amount
Vgf<tm1Srjs>/Vgf<tm1Srjs>	B6.129-Vgf<tm1Srjs>	MGI:3828159	hm	increased lean body mass
Vgf<tm1Srjs>/Vgf<tm1Srjs>	B6.129-Vgf<tm1Srjs>	MGI:3828159	hm	reduced long term depression
Vgf<tm1Srjs>/Vgf<tm1Srjs>	involves: 129S1/Sv * 129X1/SvJ * C57BL/6	MGI:2449968	hm	abnormal epididymal fat pad morphology
Vgf<tm1Srjs>/Vgf<tm1Srjs>	involves: 129S1/Sv * 129X1/SvJ * C57BL/6	MGI:2449968	hm	abnormal ovarian follicle morphology
Vgf<tm1Srjs>/Vgf<tm1Srjs>	involves: 129S1/Sv * 129X1/SvJ * C57BL/6	MGI:2449968	hm	absent corpus luteum
Vgf<tm1Srjs>/Vgf<tm1Srjs>	involves: 129S1/Sv * 129X1/SvJ * C57BL/6	MGI:2449968	hm	absent estrous cycle
Vgf<tm1Srjs>/Vgf<tm1Srjs>	involves: 129S1/Sv * 129X1/SvJ * C57BL/6	MGI:2449968	hm	absent mature ovarian follicles
Vgf<tm1Srjs>/Vgf<tm1Srjs>	involves: 129S1/Sv * 129X1/SvJ * C57BL/6	MGI:2449968	hm	decreased body weight
Vgf<tm1Srjs>/Vgf<tm1Srjs>	involves: 129S1/Sv * 129X1/SvJ * C57BL/6	MGI:2449968	hm	decreased circulating glucose level
Vgf<tm1Srjs>/Vgf<tm1Srjs>	involves: 129S1/Sv * 129X1/SvJ * C57BL/6	MGI:2449968	hm	decreased circulating insulin level
Vgf<tm1Srjs>/Vgf<tm1Srjs>	involves: 129S1/Sv * 129X1/SvJ * C57BL/6	MGI:2449968	hm	decreased circulating thyroid-stimulating hormone level
Vgf<tm1Srjs>/Vgf<tm1Srjs>	involves: 129S1/Sv * 129X1/SvJ * C57BL/6	MGI:2449968	hm	decreased circulating thyroxine level
Vgf<tm1Srjs>/Vgf<tm1Srjs>	involves: 129S1/Sv * 129X1/SvJ * C57BL/6	MGI:2449968	hm	decreased ovary weight
Vgf<tm1Srjs>/Vgf<tm1Srjs>	involves: 129S1/Sv * 129X1/SvJ * C57BL/6	MGI:2449968	hm	decreased oviduct weight
Vgf<tm1Srjs>/Vgf<tm1Srjs>	involves: 129S1/Sv * 129X1/SvJ * C57BL/6	MGI:2449968	hm	decreased seminal vesicle weight
Vgf<tm1Srjs>/Vgf<tm1Srjs>	involves: 129S1/Sv * 129X1/SvJ * C57BL/6	MGI:2449968	hm	decreased testis weight
Vgf<tm1Srjs>/Vgf<tm1Srjs>	involves: 129S1/Sv * 129X1/SvJ * C57BL/6	MGI:2449968	hm	decreased total body fat amount
Vgf<tm1Srjs>/Vgf<tm1Srjs>	involves: 129S1/Sv * 129X1/SvJ * C57BL/6	MGI:2449968	hm	decreased uterus weight
Vgf<tm1Srjs>/Vgf<tm1Srjs>	involves: 129S1/Sv * 129X1/SvJ * C57BL/6	MGI:2449968	hm	decreased white adipose tissue amount
Vgf<tm1Srjs>/Vgf<tm1Srjs>	involves: 129S1/Sv * 129X1/SvJ * C57BL/6	MGI:2449968	hm	delayed sexual maturation
Vgf<tm1Srjs>/Vgf<tm1Srjs>	involves: 129S1/Sv * 129X1/SvJ * C57BL/6	MGI:2449968	hm	delayed vaginal opening
Vgf<tm1Srjs>/Vgf<tm1Srjs>	involves: 129S1/Sv * 129X1/SvJ * C57BL/6	MGI:2449968	hm	hyperactivity
Vgf<tm1Srjs>/Vgf<tm1Srjs>	involves: 129S1/Sv * 129X1/SvJ * C57BL/6	MGI:2449968	hm	increased basal metabolism
Vgf<tm1Srjs>/Vgf<tm1Srjs>	involves: 129S1/Sv * 129X1/SvJ * C57BL/6	MGI:2449968	hm	increased circulating corticosterone level
Vgf<tm1Srjs>/Vgf<tm1Srjs>	involves: 129S1/Sv * 129X1/SvJ * C57BL/6	MGI:2449968	hm	increased oxygen consumption
Vgf<tm1Srjs>/Vgf<tm1Srjs>	involves: 129S1/Sv * 129X1/SvJ * C57BL/6	MGI:2449968	hm	lactation failure
Vgf<tm1Srjs>/Vgf<tm1Srjs>	involves: 129S1/Sv * 129X1/SvJ * C57BL/6	MGI:2449968	hm	nervous system phenotype
Vgf<tm1Srjs>/Vgf<tm1Srjs>	involves: 129S1/Sv * 129X1/SvJ * C57BL/6	MGI:2449968	hm	partial postnatal lethality
Vgf<tm1Srjs>/Vgf<tm1Srjs>	involves: 129S1/Sv * 129X1/SvJ * C57BL/6	MGI:2449968	hm	prolonged estrous cycle
Vgf<tm1Srjs>/Vgf<tm1Srjs>	involves: 129S1/Sv * 129X1/SvJ * C57BL/6	MGI:2449968	hm	reduced female fertility
Vgf<tm1Srjs>/Vgf<tm1Srjs>	involves: 129S1/Sv * 129X1/SvJ * C57BL/6	MGI:2449968	hm	reduced male fertility
Vgf<tm1Srjs>/Vgf<tm1Srjs>	involves: 129S1/Sv * 129X1/SvJ * C57BL/6	MGI:2449968	hm	shortened circadian period
Vgf<tm1Vlcg>/Vgf<tm1Vlcg>	involves: 129S6/SvEvTac * C57BL/6J * C57BL/6NTac	MGI:5688361	hm	abnormal adrenaline level
Vgf<tm1Vlcg>/Vgf<tm1Vlcg>	involves: 129S6/SvEvTac * C57BL/6J * C57BL/6NTac	MGI:5688361	hm	abnormal adrenal medulla morphology
Vgf<tm1Vlcg>/Vgf<tm1Vlcg>	involves: 129S6/SvEvTac * C57BL/6J * C57BL/6NTac	MGI:5688361	hm	abnormal noradrenergic chromaffin cell morphology
Vgf<tm1Vlcg>/Vgf<tm1Vlcg>	involves: 129S6/SvEvTac * C57BL/6J * C57BL/6NTac	MGI:5688361	hm	hypertension
Vgf<tm1Vlcg>/Vgf<tm1Vlcg>	involves: 129S6/SvEvTac * C57BL/6J * C57BL/6NTac	MGI:5688361	hm	increased circulating adrenaline level
Vgf<tm1Vlcg>/Vgf<tm1Vlcg>	involves: 129S6/SvEvTac * C57BL/6J * C57BL/6NTac	MGI:5688361	hm	increased mean systemic arterial blood pressure
Vgf<tm1Vlcg>/Vgf<tm1Vlcg>	involves: 129S6/SvEvTac * C57BL/6J * C57BL/6NTac	MGI:5688361	hm	increased noradrenaline level
Vgf<tm1Vlcg>/Vgf<tm1Vlcg>	involves: 129S6/SvEvTac * C57BL/6J * C57BL/6NTac	MGI:5688361	hm	increased systemic arterial diastolic blood pressure
Vgf<tm1Vlcg>/Vgf<tm1Vlcg>	involves: 129S6/SvEvTac * C57BL/6J * C57BL/6NTac	MGI:5688361	hm	increased systemic arterial systolic blood pressure
Vgf<tm1Vlcg>/Vgf<tm1Vlcg>	involves: 129S6/SvEvTac * C57BL/6NTac	MGI:3828162	hm	abnormal metabolism
Vgf<tm1Vlcg>/Vgf<tm1Vlcg>	involves: 129S6/SvEvTac * C57BL/6NTac	MGI:3828162	hm	behavior/neurological phenotype
Vgf<tm1Vlcg>/Vgf<tm1Vlcg>	involves: 129S6/SvEvTac * C57BL/6NTac	MGI:3828162	hm	decreased body size
Vgf<tm1Vlcg>/Vgf<tm1Vlcg>	involves: 129S6/SvEvTac * C57BL/6NTac	MGI:3828162	hm	decreased total body fat amount
Vgf<tm1Vlcg>/Vgf<tm1Vlcg>	involves: 129S6/SvEvTac * C57BL/6NTac	MGI:3828162	hm	increased lean body mass

## Sheet: 6_Astrocytes
Genotype symbol	Genotype Background	Genotype Primary Identifier	Genotype Zygosity	Ontology Annotation						MP term	p-value (Bonferroni 0.05)	Genotype	MP Ontology Term
2310022B05Rik<tm1a(EUCOMM)Hmgu>/2310022B05Rik<tm1a(EUCOMM)Hmgu>	Not Specified	MGI:5450467	hm	abnormal pupil morphology						nervous system phenotype	2.11477e-07	MGI:2172826,MGI:2176869,MGI:2179049,MGI:2182567,MGI:2182569,MGI:2447753,MGI:2653141,MGI:2654780,MGI:2654880,MGI:2656152,MGI:2660728,MGI:2669619,MGI:2677142,MGI:2677143,MGI:2677145,MGI:2677146,MGI:2678759,MGI:3029453,MGI:3033217,MGI:3033260,MGI:3034065,MGI:3034066,MGI:3034067,MGI:3037831,MGI:3043966,MGI:3044964,MGI:3050791,MGI:3056590,MGI:3057114,MGI:3505781,MGI:3513828,MGI:3522670,MGI:3579519,MGI…	MP:0003631
2310022B05Rik<tm1a(EUCOMM)Hmgu>/2310022B05Rik<tm1a(EUCOMM)Hmgu>	Not Specified	MGI:5450467	hm	corneal opacity						abnormal nervous system physiology	8.57812e-06	MGI:2447753,MGI:2654880,MGI:2656152,MGI:2677142,MGI:2677143,MGI:2677145,MGI:2678759,MGI:3029453,MGI:3033217,MGI:3033260,MGI:3034065,MGI:3034066,MGI:3034067,MGI:3037831,MGI:3043966,MGI:3056590,MGI:3057114,MGI:3522670,MGI:3579519,MGI:3584140,MGI:3639146,MGI:3639147,MGI:3716647,MGI:3722253,MGI:3835860,MGI:4360541,MGI:4415152,MGI:4459070,MGI:4849630,MGI:5013822,MGI:5140720,MGI:5512669,MGI:5559018,MGI…	MP:0003633
2310022B05Rik<tm1a(EUCOMM)Hmgu>/2310022B05Rik<tm1a(EUCOMM)Hmgu>	Not Specified	MGI:5450467	hm	decreased circulating chloride level						abnormal synaptic transmission	1.78328e-05	MGI:2447753,MGI:2656152,MGI:2677142,MGI:2677145,MGI:2678759,MGI:3033217,MGI:3034065,MGI:3034066,MGI:3034067,MGI:3056590,MGI:3057114,MGI:3522670,MGI:3584140,MGI:3639147,MGI:3716647,MGI:4360541,MGI:4415152,MGI:4459070,MGI:5140720	MP:0003635
2310022B05Rik<tm1a(EUCOMM)Hmgu>/2310022B05Rik<tm1a(EUCOMM)Hmgu>	Not Specified	MGI:5450467	hm	decreased circulating sodium level						long femur	5.60558e-05	MGI:3589422,MGI:3640392,MGI:3700940,MGI:3823047,MGI:4459836	MP:0004348
2310022B05Rik<tm1a(EUCOMM)Hmgu>/2310022B05Rik<tm1a(EUCOMM)Hmgu>	Not Specified	MGI:5450467	hm	increased B cell number						abnormal CNS synaptic transmission	6.18871e-05	MGI:2447753,MGI:2656152,MGI:2677142,MGI:2677145,MGI:2678759,MGI:3034065,MGI:3034066,MGI:3034067,MGI:3056590,MGI:3057114,MGI:3584140,MGI:3639147,MGI:3716647,MGI:4360541,MGI:4415152,MGI:4459070,MGI:5140720	MP:0002206
2310022B05Rik<tm1a(EUCOMM)Hmgu>/2310022B05Rik<tm1a(EUCOMM)Hmgu>	Not Specified	MGI:5450467	hm	increased leukocyte cell number						increased length of long bones	0.00331531	MGI:3589422,MGI:3640392,MGI:3700940,MGI:3823047,MGI:4459836	MP:0004695
2310022B05Rik<tm1a(EUCOMM)Hmgu>/2310022B05Rik<tm1a(EUCOMM)Hmgu>	Not Specified	MGI:5450467	hm	other aberrant phenotype						abnormal nervous system morphology	0.00617646	MGI:2172826,MGI:2176869,MGI:2179049,MGI:2182567,MGI:2182569,MGI:2653141,MGI:2654780,MGI:2654880,MGI:2656152,MGI:2660728,MGI:2669619,MGI:2677143,MGI:2677145,MGI:2677146,MGI:3029453,MGI:3033217,MGI:3033260,MGI:3037831,MGI:3050791,MGI:3505781,MGI:3513828,MGI:3580443,MGI:3589422,MGI:3590175,MGI:3590176,MGI:3606246,MGI:3639146,MGI:3687197,MGI:3696818,MGI:3722253,MGI:3762776,MGI:3810278,MGI:3810294,MGI…	MP:0003632
Acot11<tm1Deco>/Acot11<tm1Deco>	involves: 129S6/SvEvTac * C57BL/6	MGI:5317950	hm	abnormal adipocyte glucose uptake						long humerus	0.00761929	MGI:3640392,MGI:3700940,MGI:3823047	MP:0004350
Acot11<tm1Deco>/Acot11<tm1Deco>	involves: 129S6/SvEvTac * C57BL/6	MGI:5317950	hm	abnormal brown adipose tissue morphology						abnormal long term potentiation	0.00897399	MGI:2447753,MGI:2656152,MGI:2677145,MGI:2678759,MGI:3034065,MGI:3034066,MGI:3034067,MGI:3057114,MGI:5140720	MP:0002207
Acot11<tm1Deco>/Acot11<tm1Deco>	involves: 129S6/SvEvTac * C57BL/6	MGI:5317950	hm	abnormal brown adipose tissue physiology						abnormal telencephalon morphology	0.0267824	MGI:2182567,MGI:2182569,MGI:2653141,MGI:2656152,MGI:2660728,MGI:2669619,MGI:2677143,MGI:3033260,MGI:3050791,MGI:3505781,MGI:3580443,MGI:3606246,MGI:3687197,MGI:3722253,MGI:3810294,MGI:3835860,MGI:5660342	MP:0000787
Acot11<tm1Deco>/Acot11<tm1Deco>	involves: 129S6/SvEvTac * C57BL/6	MGI:5317950	hm	abnormal brown fat cell morphology						abnormal limbic system morphology	0.0269866	MGI:2182569,MGI:2653141,MGI:2656152,MGI:2660728,MGI:2669619,MGI:3033260,MGI:3505781,MGI:3580443,MGI:3606246,MGI:3687197,MGI:3810294	MP:0004166
Acot11<tm1Deco>/Acot11<tm1Deco>	involves: 129S6/SvEvTac * C57BL/6	MGI:5317950	hm	abnormal fatty acid oxidation						abnormal cerebrum morphology	0.0308064	MGI:2182569,MGI:2653141,MGI:2656152,MGI:2660728,MGI:2677143,MGI:3033260,MGI:3050791,MGI:3505781,MGI:3580443,MGI:3606246,MGI:3687197,MGI:3810294,MGI:3835860,MGI:5660342	MP:0008540
Acot11<tm1Deco>/Acot11<tm1Deco>	involves: 129S6/SvEvTac * C57BL/6	MGI:5317950	hm	behavior/neurological phenotype
Acot11<tm1Deco>/Acot11<tm1Deco>	involves: 129S6/SvEvTac * C57BL/6	MGI:5317950	hm	decreased brown fat cell lipid droplet size
Acot11<tm1Deco>/Acot11<tm1Deco>	involves: 129S6/SvEvTac * C57BL/6	MGI:5317950	hm	decreased circulating cholesterol level
Acot11<tm1Deco>/Acot11<tm1Deco>	involves: 129S6/SvEvTac * C57BL/6	MGI:5317950	hm	decreased circulating glucose level
Acot11<tm1Deco>/Acot11<tm1Deco>	involves: 129S6/SvEvTac * C57BL/6	MGI:5317950	hm	decreased circulating HDL cholesterol level
Acot11<tm1Deco>/Acot11<tm1Deco>	involves: 129S6/SvEvTac * C57BL/6	MGI:5317950	hm	decreased inflammatory response
Acot11<tm1Deco>/Acot11<tm1Deco>	involves: 129S6/SvEvTac * C57BL/6	MGI:5317950	hm	decreased lean body mass
Acot11<tm1Deco>/Acot11<tm1Deco>	involves: 129S6/SvEvTac * C57BL/6	MGI:5317950	hm	decreased physiological sensitivity to xenobiotic
Acot11<tm1Deco>/Acot11<tm1Deco>	involves: 129S6/SvEvTac * C57BL/6	MGI:5317950	hm	decreased susceptibility to diet-induced obesity
Acot11<tm1Deco>/Acot11<tm1Deco>	involves: 129S6/SvEvTac * C57BL/6	MGI:5317950	hm	decreased susceptibility to hepatic steatosis
Acot11<tm1Deco>/Acot11<tm1Deco>	involves: 129S6/SvEvTac * C57BL/6	MGI:5317950	hm	homeostasis/metabolism phenotype
Acot11<tm1Deco>/Acot11<tm1Deco>	involves: 129S6/SvEvTac * C57BL/6	MGI:5317950	hm	improved glucose tolerance
Acot11<tm1Deco>/Acot11<tm1Deco>	involves: 129S6/SvEvTac * C57BL/6	MGI:5317950	hm	increased brown adipose tissue amount
Acot11<tm1Deco>/Acot11<tm1Deco>	involves: 129S6/SvEvTac * C57BL/6	MGI:5317950	hm	increased circulating triglyceride level
Acot11<tm1Deco>/Acot11<tm1Deco>	involves: 129S6/SvEvTac * C57BL/6	MGI:5317950	hm	increased energy expenditure
Acot11<tm1Deco>/Acot11<tm1Deco>	involves: 129S6/SvEvTac * C57BL/6	MGI:5317950	hm	increased fatty acid level
Acot11<tm1Deco>/Acot11<tm1Deco>	involves: 129S6/SvEvTac * C57BL/6	MGI:5317950	hm	increased food intake
Acot11<tm1Deco>/Acot11<tm1Deco>	involves: 129S6/SvEvTac * C57BL/6	MGI:5317950	hm	increased oxygen consumption
Acot11<tm1Deco>/Acot11<tm1Deco>	involves: 129S6/SvEvTac * C57BL/6	MGI:5317950	hm	increased respiratory quotient
Adcyap1r1<tm1.1Gsc>/Adcyap1r1<tm1.1Gsc>	involves: 129P2/OlaHsd	MGI:2447753	hm	abnormal contextual conditioning behavior
Adcyap1r1<tm1.1Gsc>/Adcyap1r1<tm1.1Gsc>	involves: 129P2/OlaHsd	MGI:2447753	hm	decreased anxiety-related response
Adcyap1r1<tm1.1Gsc>/Adcyap1r1<tm1.1Gsc>	involves: 129P2/OlaHsd	MGI:2447753	hm	hyperactivity
Adcyap1r1<tm1.1Gsc>/Adcyap1r1<tm1.1Gsc>	involves: 129P2/OlaHsd	MGI:2447753	hm	partial postnatal lethality
Adcyap1r1<tm1.1Gsc>/Adcyap1r1<tm1.1Gsc>	involves: 129P2/OlaHsd	MGI:2447753	hm	reduced long term potentiation
Adcyap1r1<tm1Aba>/Adcyap1r1<tm1Aba>	involves: C57BL/6	MGI:2447784	hm	no abnormal phenotype detected
Adcyap1r1<tm1Bbt>/Adcyap1r1<tm1Bbt>	involves: 129 * C57BL/6J	MGI:2447790	hm	decreased body weight
Adcyap1r1<tm1Bbt>/Adcyap1r1<tm1Bbt>	involves: 129 * C57BL/6J	MGI:2447790	hm	decreased circulating insulin level
Adcyap1r1<tm1Bbt>/Adcyap1r1<tm1Bbt>	involves: 129 * C57BL/6J	MGI:2447790	hm	delayed circadian phase
Adcyap1r1<tm1Bbt>/Adcyap1r1<tm1Bbt>	involves: 129 * C57BL/6J	MGI:2447790	hm	impaired glucose tolerance
Adcyap1r1<tm1Bbt>/Adcyap1r1<tm1Bbt>	involves: 129 * C57BL/6J	MGI:2447790	hm	increased circulating insulin level
Adcyap1r1<tm1Bbt>/Adcyap1r1<tm1Bbt>	involves: 129 * C57BL/6J	MGI:2447790	hm	increased susceptibility to bacterial infection
Adcyap1r1<tm1Bbt>/Adcyap1r1<tm1Bbt>	involves: 129 * C57BL/6J	MGI:2447790	hm	partial postnatal lethality
Adcyap1r1<tm1Bbt>/Adcyap1r1<tm1Bbt>	involves: 129 * C57BL/6J	MGI:2447790	hm	prolonged diestrus
Adcyap1r1<tm1Bbt>/Adcyap1r1<tm1Bbt>	involves: 129 * C57BL/6J	MGI:2447790	hm	prolonged estrous cycle
Adcyap1r1<tm1Bbt>/Adcyap1r1<tm1Bbt>	involves: 129 * C57BL/6J	MGI:2447790	hm	reduced female fertility
Adcyap1r1<tm1Bbt>/Adcyap1r1<tm1Bbt>	involves: 129 * C57BL/6J	MGI:2447790	hm	shortened circadian period
Adcyap1r1<tm1Dgen>/Adcyap1r1<tm1Dgen>	involves: 129P2/OlaHsd * C57BL/6J	MGI:5427742	hm	no phenotypic analysis
Ahcyl1<tm1.1Smua>/Ahcyl1<tm1.1Smua>	involves: C57BL/6 * C57BL/6NCrlj * CBA/JNCrlj * FVB/N	MGI:5694762	hm	abnormal exocrine pancreas physiology
Ahcyl1<tm1a(EUCOMM)Wtsi>/Ahcyl1<tm1a(EUCOMM)Wtsi>	C57BL/6N-Ahcyl1<tm1a(EUCOMM)Wtsi>/Wtsi	MGI:5608419	hm	abnormal cornea morphology
Ahcyl1<tm1a(EUCOMM)Wtsi>/Ahcyl1<tm1a(EUCOMM)Wtsi>	C57BL/6N-Ahcyl1<tm1a(EUCOMM)Wtsi>/Wtsi	MGI:5608419	hm	decreased circulating cholesterol level
Ahcyl1<tm1a(EUCOMM)Wtsi>/Ahcyl1<tm1a(EUCOMM)Wtsi>	C57BL/6N-Ahcyl1<tm1a(EUCOMM)Wtsi>/Wtsi	MGI:5608419	hm	decreased circulating HDL cholesterol level
Ahcyl1<tm1a(EUCOMM)Wtsi>/Ahcyl1<tm1a(EUCOMM)Wtsi>	C57BL/6N-Ahcyl1<tm1a(EUCOMM)Wtsi>/Wtsi	MGI:5608419	hm	decreased lean body mass
Ahcyl1<tm1a(EUCOMM)Wtsi>/Ahcyl1<tm1a(EUCOMM)Wtsi>	C57BL/6N-Ahcyl1<tm1a(EUCOMM)Wtsi>/Wtsi	MGI:5608419	hm	decreased total body fat amount
Ahcyl1<tm1a(EUCOMM)Wtsi>/Ahcyl1<tm1a(EUCOMM)Wtsi>	C57BL/6N-Ahcyl1<tm1a(EUCOMM)Wtsi>/Wtsi	MGI:5608419	hm	increased bone mineral content
Ahcyl1<tm1a(EUCOMM)Wtsi>/Ahcyl1<tm1a(EUCOMM)Wtsi>	C57BL/6N-Ahcyl1<tm1a(EUCOMM)Wtsi>/Wtsi	MGI:5608419	hm	increased mean platelet volume
Ahcyl1<tm1a(EUCOMM)Wtsi>/Ahcyl1<tm1a(EUCOMM)Wtsi>	Not Specified	MGI:5477932	hm	decreased body weight
Akt2<tm1.1Mbb>/Akt2<tm1.1Mbb>	B6.129P2-Akt2<tm1.1Mbb>	MGI:4889116	hm	decreased circulating glucose level
Akt2<tm1.1Mbb>/Akt2<tm1.1Mbb>	B6.129P2-Akt2<tm1.1Mbb>	MGI:4889116	hm	decreased liver triglyceride level
Akt2<tm1.1Mbb>/Akt2<tm1.1Mbb>	B6.129P2-Akt2<tm1.1Mbb>	MGI:4889116	hm	decreased susceptibility to diet-induced obesity
Akt2<tm1.1Mbb>/Akt2<tm1.1Mbb>	B6.129P2-Akt2<tm1.1Mbb>	MGI:4889116	hm	increased circulating insulin level
Akt2<tm1.1Mbb>/Akt2<tm1.1Mbb>	involves: 129P2/OlaHsd	MGI:3803967	hm	decreased liver triglyceride level
Akt2<tm1.1Mbb>/Akt2<tm1.1Mbb>	involves: 129P2/OlaHsd	MGI:3803967	hm	hyperglycemia
Akt2<tm1.1Mbb>/Akt2<tm1.1Mbb>	involves: 129P2/OlaHsd	MGI:3803967	hm	immune system phenotype
Akt2<tm1.1Mbb>/Akt2<tm1.1Mbb>	involves: 129P2/OlaHsd	MGI:3803967	hm	impaired glucose tolerance
Akt2<tm1.1Mbb>/Akt2<tm1.1Mbb>	involves: 129P2/OlaHsd * C57BL/6	MGI:3629188	hm	abnormal adipocyte glucose uptake
Akt2<tm1.1Mbb>/Akt2<tm1.1Mbb>	involves: 129P2/OlaHsd * C57BL/6	MGI:3629188	hm	abnormal muscle cell glucose uptake
Akt2<tm1.1Mbb>/Akt2<tm1.1Mbb>	involves: 129P2/OlaHsd * C57BL/6	MGI:3629188	hm	Diabetes Mellitus, Noninsulin-Dependent
Akt2<tm1.1Mbb>/Akt2<tm1.1Mbb>	involves: 129P2/OlaHsd * C57BL/6	MGI:3629188	hm	hyperglycemia
Akt2<tm1.1Mbb>/Akt2<tm1.1Mbb>	involves: 129P2/OlaHsd * C57BL/6	MGI:3629188	hm	impaired glucose tolerance
Akt2<tm1.1Mbb>/Akt2<tm1.1Mbb>	involves: 129P2/OlaHsd * C57BL/6	MGI:3629188	hm	increased circulating insulin level
Akt2<tm1.1Mbb>/Akt2<tm1.1Mbb>	involves: 129P2/OlaHsd * C57BL/6	MGI:3629188	hm	increased pancreatic beta cell number
Akt2<tm1.1Mbb>/Akt2<tm1.1Mbb>	involves: 129P2/OlaHsd * C57BL/6	MGI:3629188	hm	insulin resistance
Akt2<tm1Hem>/Akt2<tm1Hem>	involves: 129P2/OlaHsd	MGI:5429853	hm	abnormal ovary morphology
Akt2<tm1Hem>/Akt2<tm1Hem>	involves: 129P2/OlaHsd	MGI:5429853	hm	decreased corpora lutea number
Akt2<tm1Hem>/Akt2<tm1Hem>	involves: 129P2/OlaHsd	MGI:5429853	hm	increased circulating testosterone level
Akt2<tm1Hem>/Akt2<tm1Hem>	involves: 129P2/OlaHsd	MGI:5429853	hm	increased theca cell number
Akt2<tm1Hem>/Akt2<tm1Hem>	involves: 129P2/OlaHsd	MGI:5429853	hm	ovary cysts
Akt2<tm1Hem>/Akt2<tm1Hem>	involves: 129P2/OlaHsd	MGI:5429853	hm	Polycystic Ovary Syndrome 1
Akt2<tm1Hem>/Akt2<tm1Hem>	involves: 129P2/OlaHsd * C57BL/6	MGI:3691593	hm	hyperglycemia
Akt2<tm1Hem>/Akt2<tm1Hem>	involves: 129P2/OlaHsd * C57BL/6	MGI:3691593	hm	impaired glucose tolerance
Akt2<tm1Hem>/Akt2<tm1Hem>	involves: 129P2/OlaHsd * C57BL/6	MGI:3691593	hm	increased circulating insulin level
Akt2<tm1Hem>/Akt2<tm1Hem>	involves: 129P2/OlaHsd * C57BL/6	MGI:3691593	hm	insulin resistance
Akt2<tm1Rsg>/Akt2<tm1Rsg>	DBA/1LacJ	MGI:2673750	hm	abnormal glucose homeostasis
Akt2<tm1Rsg>/Akt2<tm1Rsg>	DBA/1LacJ	MGI:2673750	hm	decreased body length
Akt2<tm1Rsg>/Akt2<tm1Rsg>	DBA/1LacJ	MGI:2673750	hm	decreased body weight
Akt2<tm1Rsg>/Akt2<tm1Rsg>	DBA/1LacJ	MGI:2673750	hm	decreased brown adipose tissue amount
Akt2<tm1Rsg>/Akt2<tm1Rsg>	DBA/1LacJ	MGI:2673750	hm	decreased circulating insulin level
Akt2<tm1Rsg>/Akt2<tm1Rsg>	DBA/1LacJ	MGI:2673750	hm	decreased pancreatic beta cell number
Akt2<tm1Rsg>/Akt2<tm1Rsg>	DBA/1LacJ	MGI:2673750	hm	decreased white adipose tissue amount
Akt2<tm1Rsg>/Akt2<tm1Rsg>	DBA/1LacJ	MGI:2673750	hm	hyperglycemia
Akt2<tm1Rsg>/Akt2<tm1Rsg>	DBA/1LacJ	MGI:2673750	hm	impaired glucose tolerance
Akt2<tm1Rsg>/Akt2<tm1Rsg>	DBA/1LacJ	MGI:2673750	hm	increased circulating insulin level
Akt2<tm1Rsg>/Akt2<tm1Rsg>	DBA/1LacJ	MGI:2673750	hm	insulin resistance
Akt2<tm1Rsg>/Akt2<tm1Rsg>	involves: C57BL/6 * DBA/1LacJ	MGI:3848165	hm	decreased circulating leptin level
Akt2<tm1Rsg>/Akt2<tm1Rsg>	involves: C57BL/6 * DBA/1LacJ	MGI:3848165	hm	enlarged pancreatic islets
Akt2<tm1Rsg>/Akt2<tm1Rsg>	involves: C57BL/6 * DBA/1LacJ	MGI:3848165	hm	impaired glucose tolerance
Akt2<tm1Rsg>/Akt2<tm1Rsg>	involves: C57BL/6 * DBA/1LacJ	MGI:3848165	hm	increased circulating insulin level
Akt2<tm1Rsg>/Akt2<tm1Rsg>	involves: C57BL/6 * DBA/1LacJ	MGI:3848165	hm	insulin resistance
Aldh5a1<tm1Kmg>/Aldh5a1<tm1Kmg>	involves: 129/Sv * C57BL/6	MGI:2654880	hm	abnormal amino acid level
Aldh5a1<tm1Kmg>/Aldh5a1<tm1Kmg>	involves: 129/Sv * C57BL/6	MGI:2654880	hm	abnormal brain wave pattern
Aldh5a1<tm1Kmg>/Aldh5a1<tm1Kmg>	involves: 129/Sv * C57BL/6	MGI:2654880	hm	abnormal metabolism
Aldh5a1<tm1Kmg>/Aldh5a1<tm1Kmg>	involves: 129/Sv * C57BL/6	MGI:2654880	hm	abnormal urine homeostasis
Aldh5a1<tm1Kmg>/Aldh5a1<tm1Kmg>	involves: 129/Sv * C57BL/6	MGI:2654880	hm	absence seizures
Aldh5a1<tm1Kmg>/Aldh5a1<tm1Kmg>	involves: 129/Sv * C57BL/6	MGI:2654880	hm	ataxia
Aldh5a1<tm1Kmg>/Aldh5a1<tm1Kmg>	involves: 129/Sv * C57BL/6	MGI:2654880	hm	complete postnatal lethality
Aldh5a1<tm1Kmg>/Aldh5a1<tm1Kmg>	involves: 129/Sv * C57BL/6	MGI:2654880	hm	decreased body weight
Aldh5a1<tm1Kmg>/Aldh5a1<tm1Kmg>	involves: 129/Sv * C57BL/6	MGI:2654880	hm	gliosis
Aldh5a1<tm1Kmg>/Aldh5a1<tm1Kmg>	involves: 129/Sv * C57BL/6	MGI:2654880	hm	homeostasis/metabolism phenotype
Aldh5a1<tm1Kmg>/Aldh5a1<tm1Kmg>	involves: 129/Sv * C57BL/6	MGI:2654880	hm	myoclonus
Aldh5a1<tm1Kmg>/Aldh5a1<tm1Kmg>	involves: 129/Sv * C57BL/6	MGI:2654880	hm	Succinic Semialdehyde Dehydrogenase Deficiency
Aldh5a1<tm1Kmg>/Aldh5a1<tm1Kmg>	involves: 129/Sv * C57BL/6	MGI:2654880	hm	tonic seizures
Arhgef26<tm1.1Kbur>/Arhgef26<tm1.1Kbur>	B6.Cg-Arhgef26<tm1.1Kbur>	MGI:5500051	hm	abnormal vascular endothelial cell morphology
Arhgef26<tm1.1Kbur>/Arhgef26<tm1.1Kbur>	B6.Cg-Arhgef26<tm1.1Kbur>	MGI:5500051	hm	abnormal vascular endothelial cell physiology
Atp1a2<tm1Kwk>/Atp1a2<tm1Kwk>	involves: 129X1/SvJ * C57BL/6J	MGI:2669619	hm	abnormal amygdala morphology
Atp1a2<tm1Kwk>/Atp1a2<tm1Kwk>	involves: 129X1/SvJ * C57BL/6J	MGI:2669619	hm	abnormal olfactory cortex morphology
Atp1a2<tm1Kwk>/Atp1a2<tm1Kwk>	involves: 129X1/SvJ * C57BL/6J	MGI:2669619	hm	complete neonatal lethality
Atp1a2<tm1Kwk>/Atp1a2<tm1Kwk>	involves: 129X1/SvJ * C57BL/6J	MGI:2669619	hm	embryogenesis phenotype
Atp1a2<tm2Kwk>/Atp1a2<tm2Kwk>	B6.129X1-Atp1a2<tm2Kwk>	MGI:3522670	hm	abnormal action potential
Atp1a2<tm2Kwk>/Atp1a2<tm2Kwk>	B6.129X1-Atp1a2<tm2Kwk>	MGI:3522670	hm	abnormal nervous system electrophysiology
Atp1a2<tm2Kwk>/Atp1a2<tm2Kwk>	B6.129X1-Atp1a2<tm2Kwk>	MGI:3522670	hm	abnormal neurotransmitter level
Atp1a2<tm2Kwk>/Atp1a2<tm2Kwk>	B6.129X1-Atp1a2<tm2Kwk>	MGI:3522670	hm	abnormal somatic nervous system physiology
Atp1a2<tm2Kwk>/Atp1a2<tm2Kwk>	B6.129X1-Atp1a2<tm2Kwk>	MGI:3522670	hm	complete neonatal lethality
Atp1a2<tm2Kwk>/Atp1a2<tm2Kwk>	B6.129X1-Atp1a2<tm2Kwk>	MGI:3522670	hm	no spontaneous movement
Atp1a2<tm2Kwk>/Atp1a2<tm2Kwk>	B6.129X1-Atp1a2<tm2Kwk>	MGI:3522670	hm	respiratory failure
Atp1a2<tm2Kwk>/Atp1a2<tm2Kwk>	B6.129X1-Atp1a2<tm2Kwk>	MGI:3522670	hm	unresponsive to tactile stimuli
Atp1a2<tm2Ling>/Atp1a2<tm2Ling>	involves: 129P2/OlaHsd * C57BL/6 * Black Swiss	MGI:2451295	hm	complete neonatal lethality
Bcan<tm1Ref>/Bcan<tm1Ref>	B6.Cg-Bcan<tm1Ref>	MGI:3046583	hm	behavior/neurological phenotype
Bcan<tm1Ref>/Bcan<tm1Ref>	either: (involves: 129/Sv) or (involves: 129/Sv * C57BL/6)	MGI:2656152	hm	abnormal hippocampus morphology
Bcan<tm1Ref>/Bcan<tm1Ref>	either: (involves: 129/Sv) or (involves: 129/Sv * C57BL/6)	MGI:2656152	hm	abnormal long term potentiation
Bcan<tm1Ref>/Bcan<tm1Ref>	either: (involves: 129/Sv) or (involves: 129/Sv * C57BL/6)	MGI:2656152	hm	nervous system phenotype
Ccdc88a<tm1Mat>/Ccdc88a<tm1Mat>	Not Specified	MGI:3835860	hm	abnormal GABAergic neuron morphology
Ccdc88a<tm1Mat>/Ccdc88a<tm1Mat>	Not Specified	MGI:3835860	hm	abnormal neocortex morphology
Ccdc88a<tm1Mat>/Ccdc88a<tm1Mat>	Not Specified	MGI:3835860	hm	abnormal neuronal migration
Ccdc88a<tm1Mat>/Ccdc88a<tm1Mat>	Not Specified	MGI:3835860	hm	abnormal neuron differentiation
Ccdc88a<tm1Mat>/Ccdc88a<tm1Mat>	Not Specified	MGI:3835860	hm	abnormal olfactory bulb development
Ccdc88a<tm1Mat>/Ccdc88a<tm1Mat>	Not Specified	MGI:3835860	hm	abnormal olfactory bulb glomerular layer morphology
Ccdc88a<tm1Mat>/Ccdc88a<tm1Mat>	Not Specified	MGI:3835860	hm	abnormal olfactory bulb granule cell layer morphology
Ccdc88a<tm1Mat>/Ccdc88a<tm1Mat>	Not Specified	MGI:3835860	hm	abnormal olfactory bulb mitral cell layer morphology
Ccdc88a<tm1Mat>/Ccdc88a<tm1Mat>	Not Specified	MGI:3835860	hm	abnormal olfactory bulb morphology
Ccdc88a<tm1Mat>/Ccdc88a<tm1Mat>	Not Specified	MGI:3835860	hm	abnormal olfactory bulb subventricular zone morphology
Ccdc88a<tm1Mat>/Ccdc88a<tm1Mat>	Not Specified	MGI:3835860	hm	abnormal retinal vasculature morphology
Ccdc88a<tm1Mat>/Ccdc88a<tm1Mat>	Not Specified	MGI:3835860	hm	abnormal rostral migratory stream morphology
Ccdc88a<tm1Mat>/Ccdc88a<tm1Mat>	Not Specified	MGI:3835860	hm	decreased angiogenesis
Ccdc88a<tm1Mat>/Ccdc88a<tm1Mat>	Not Specified	MGI:3835860	hm	decreased body weight
Ccdc88a<tm1Mat>/Ccdc88a<tm1Mat>	Not Specified	MGI:3835860	hm	decreased brain size
Ccdc88a<tm1Mat>/Ccdc88a<tm1Mat>	Not Specified	MGI:3835860	hm	decreased neuron number
Ccdc88a<tm1Mat>/Ccdc88a<tm1Mat>	Not Specified	MGI:3835860	hm	nervous system phenotype
Ccdc88a<tm1Mat>/Ccdc88a<tm1Mat>	Not Specified	MGI:3835860	hm	premature death
Ccdc88a<tm1Mat>/Ccdc88a<tm1Mat>	Not Specified	MGI:3835860	hm	small olfactory bulb
Ccdc88a<tm1Mat>/Ccdc88a<tm1Mat>	Not Specified	MGI:3835860	hm	weight loss
Ccdc88a<tm2.1Mat>/Ccdc88a<tm2.1Mat>	involves: 129S6/SvEvTac * C57BL/6	MGI:5140720	hm	abnormal dendritic spine morphology
Ccdc88a<tm2.1Mat>/Ccdc88a<tm2.1Mat>	involves: 129S6/SvEvTac * C57BL/6	MGI:5140720	hm	abnormal excitatory postsynaptic currents
Ccdc88a<tm2.1Mat>/Ccdc88a<tm2.1Mat>	involves: 129S6/SvEvTac * C57BL/6	MGI:5140720	hm	abnormal habituation to a new environment
Ccdc88a<tm2.1Mat>/Ccdc88a<tm2.1Mat>	involves: 129S6/SvEvTac * C57BL/6	MGI:5140720	hm	abnormal long term object recognition memory
Ccdc88a<tm2.1Mat>/Ccdc88a<tm2.1Mat>	involves: 129S6/SvEvTac * C57BL/6	MGI:5140720	hm	decreased prepulse inhibition
Ccdc88a<tm2.1Mat>/Ccdc88a<tm2.1Mat>	involves: 129S6/SvEvTac * C57BL/6	MGI:5140720	hm	growth/size/body region phenotype
Ccdc88a<tm2.1Mat>/Ccdc88a<tm2.1Mat>	involves: 129S6/SvEvTac * C57BL/6	MGI:5140720	hm	impaired contextual conditioning behavior
Ccdc88a<tm2.1Mat>/Ccdc88a<tm2.1Mat>	involves: 129S6/SvEvTac * C57BL/6	MGI:5140720	hm	impaired spatial learning
Ccdc88a<tm2.1Mat>/Ccdc88a<tm2.1Mat>	involves: 129S6/SvEvTac * C57BL/6	MGI:5140720	hm	mortality/aging
Ccdc88a<tm2.1Mat>/Ccdc88a<tm2.1Mat>	involves: 129S6/SvEvTac * C57BL/6	MGI:5140720	hm	reduced long term potentiation
Ccdc88a<tm2.1Mat>/Ccdc88a<tm2.1Mat>	involves: 129S6/SvEvTac * C57BL/6	MGI:5140720	hm	reduced sensorimotor gating
Celrr<tm1Vlcg>/Celrr<tm1Vlcg>	involves: 129S6/SvEvTac * C57BL/6J * C57BL/6N	MGI:5563555	hm	no abnormal phenotype detected
Chst2<tm1Tmu>/Chst2<tm1Tmu>	involves: 129S2/SvPas * C57BL/6J	MGI:3053811	hm	abnormal leukocyte migration
Chst2<tm1Tmu>/Chst2<tm1Tmu>	involves: 129S2/SvPas * C57BL/6J	MGI:3053811	hm	abnormal leukocyte physiology
Cspg5<tm1Fgr>/Cspg5<tm1Fgr>	B6.129P2-Cspg5<tm1Fgr>	MGI:3584140	hm	abnormal CNS synaptic transmission
Cspg5<tm1Fgr>/Cspg5<tm1Fgr>	B6.129P2-Cspg5<tm1Fgr>	MGI:3584140	hm	abnormal excitatory postsynaptic currents
Cspg5<tm1Fgr>/Cspg5<tm1Fgr>	B6.129P2-Cspg5<tm1Fgr>	MGI:3584140	hm	abnormal inhibitory postsynaptic currents
Cspg5<tm1Fgr>/Cspg5<tm1Fgr>	B6.129P2-Cspg5<tm1Fgr>	MGI:3584140	hm	abnormal maternal nurturing
Cspg5<tm1Fgr>/Cspg5<tm1Fgr>	B6.129P2-Cspg5<tm1Fgr>	MGI:3584140	hm	enhanced paired-pulse facilitation
Cspg5<tm1Fgr>/Cspg5<tm1Fgr>	B6.129P2-Cspg5<tm1Fgr>	MGI:3584140	hm	reduced long term depression
Ctnnd2<tm1Lxin>/Ctnnd2<tm1Lxin>	involves: 129S4/SvJae * C57BL/6NTac	MGI:3057114	hm	abnormal contextual conditioning behavior
Ctnnd2<tm1Lxin>/Ctnnd2<tm1Lxin>	involves: 129S4/SvJae * C57BL/6NTac	MGI:3057114	hm	abnormal cued conditioning behavior
Ctnnd2<tm1Lxin>/Ctnnd2<tm1Lxin>	involves: 129S4/SvJae * C57BL/6NTac	MGI:3057114	hm	abnormal long term potentiation
Ctnnd2<tm1Lxin>/Ctnnd2<tm1Lxin>	involves: 129S4/SvJae * C57BL/6NTac	MGI:3057114	hm	abnormal spatial learning
Ctnnd2<tm1Lxin>/Ctnnd2<tm1Lxin>	involves: 129S4/SvJae * C57BL/6NTac	MGI:3057114	hm	impaired coordination
Daam2<tm1a(KOMP)Wtsi>/Daam2<tm1a(KOMP)Wtsi>	C57BL/6N-Daam2<tm1a(KOMP)Wtsi>/Wtsi	MGI:5608478	hm	abnormal bone structure
Daam2<tm1a(KOMP)Wtsi>/Daam2<tm1a(KOMP)Wtsi>	C57BL/6N-Daam2<tm1a(KOMP)Wtsi>/Wtsi	MGI:5608478	hm	abnormal cranium morphology
Daam2<tm1a(KOMP)Wtsi>/Daam2<tm1a(KOMP)Wtsi>	C57BL/6N-Daam2<tm1a(KOMP)Wtsi>/Wtsi	MGI:5608478	hm	abnormal maxilla morphology
Daam2<tm1a(KOMP)Wtsi>/Daam2<tm1a(KOMP)Wtsi>	C57BL/6N-Daam2<tm1a(KOMP)Wtsi>/Wtsi	MGI:5608478	hm	decreased body length
Daam2<tm1a(KOMP)Wtsi>/Daam2<tm1a(KOMP)Wtsi>	C57BL/6N-Daam2<tm1a(KOMP)Wtsi>/Wtsi	MGI:5608478	hm	decreased lean body mass
Daam2<tm1a(KOMP)Wtsi>/Daam2<tm1a(KOMP)Wtsi>	C57BL/6N-Daam2<tm1a(KOMP)Wtsi>/Wtsi	MGI:5608478	hm	increased circulating alkaline phosphatase level
Daam2<tm1a(KOMP)Wtsi>/Daam2<tm1a(KOMP)Wtsi>	Not Specified	MGI:5464333	hm	abnormal cranium morphology
Daam2<tm1a(KOMP)Wtsi>/Daam2<tm1a(KOMP)Wtsi>	Not Specified	MGI:5464333	hm	abnormal snout morphology
Daam2<tm1a(KOMP)Wtsi>/Daam2<tm1a(KOMP)Wtsi>	Not Specified	MGI:5464333	hm	decreased body length
Daam2<tm1a(KOMP)Wtsi>/Daam2<tm1a(KOMP)Wtsi>	Not Specified	MGI:5464333	hm	decreased body weight
Daam2<tm1a(KOMP)Wtsi>/Daam2<tm1a(KOMP)Wtsi>	Not Specified	MGI:5464333	hm	decreased bone mineral content
Daam2<tm1a(KOMP)Wtsi>/Daam2<tm1a(KOMP)Wtsi>	Not Specified	MGI:5464333	hm	increased susceptibility to bacterial infection
Dab1<tm1.1Bwh>/Dab1<tm1.1Bwh>	involves: 129S4/SvJaeSor * C57BL/6	MGI:3810278	hm	abnormal nervous system morphology
Dab1<tm1.1Bwh>/Dab1<tm1.1Bwh>	involves: 129S4/SvJaeSor * C57BL/6	MGI:3810278	hm	ataxia
Dab1<tm1Cpr>/Dab1<tm1Cpr>	either: (involves: 129S4/SvJaeSor * BALB/c) or (involves: 129S4/SvJaeSor * C57BL/6)	MGI:3722253	hm	abnormal neuronal migration
Dab1<tm1Cpr>/Dab1<tm1Cpr>	either: (involves: 129S4/SvJaeSor * BALB/c) or (involves: 129S4/SvJaeSor * C57BL/6)	MGI:3722253	hm	abnormal olfactory bulb granule cell layer morphology
Dab1<tm1Cpr>/Dab1<tm1Cpr>	either: (involves: 129S4/SvJaeSor * BALB/c) or (involves: 129S4/SvJaeSor * C57BL/6)	MGI:3722253	hm	abnormal olfactory bulb morphology
Dab1<tm1Cpr>/Dab1<tm1Cpr>	either: (involves: 129S4/SvJaeSor * BALB/c) or (involves: 129S4/SvJaeSor * C57BL/6)	MGI:3722253	hm	abnormal postnatal subventricular zone morphology
Dab1<tm1Cpr>/Dab1<tm1Cpr>	either: (involves: 129S4/SvJaeSor * BALB/c) or (involves: 129S4/SvJaeSor * C57BL/6)	MGI:3722253	hm	abnormal rostral migratory stream morphology
Dab1<tm1Cpr>/Dab1<tm1Cpr>	involves: 129S4/SvJaeSor	MGI:3810294	hm	abnormal cortical marginal zone morphology
Dab1<tm1Cpr>/Dab1<tm1Cpr>	involves: 129S4/SvJaeSor	MGI:3810294	hm	abnormal dentate gyrus morphology
Dab1<tm1Cpr>/Dab1<tm1Cpr>	involves: 129S4/SvJaeSor	MGI:3810294	hm	abnormal hippocampus pyramidal cell layer
Dab1<tm1Cpr>/Dab1<tm1Cpr>	involves: 129S4/SvJaeSor * C57BL/6	MGI:3722182	hm	premature death
Dab1<tm1Cpr>/Dab1<tm1Cpr>	involves: 129/Sv * C57BL/6	MGI:3050791	hm	abnormal cerebral cortex morphology
Ddah1<tm1.1Yjch>/Ddah1<tm1.1Yjch>	involves: 129S1/Sv * 129S4/SvJae	MGI:5424473	hm	abnormal amino acid level
Ddah1<tm1.1Yjch>/Ddah1<tm1.1Yjch>	involves: 129S1/Sv * 129S4/SvJae	MGI:5424473	hm	abnormal circulating amino acid level
Ddah1<tm1.1Yjch>/Ddah1<tm1.1Yjch>	involves: 129S1/Sv * 129S4/SvJae	MGI:5424473	hm	abnormal enzyme/coenzyme activity
Ddah1<tm1.1Yjch>/Ddah1<tm1.1Yjch>	involves: 129S1/Sv * 129S4/SvJae	MGI:5424473	hm	abnormal nitric oxide homeostasis
Ddah1<tm1.1Yjch>/Ddah1<tm1.1Yjch>	involves: 129S1/Sv * 129S4/SvJae	MGI:5424473	hm	cardiovascular system phenotype
Ddah1<tm1.1Yjch>/Ddah1<tm1.1Yjch>	involves: 129S1/Sv * 129S4/SvJae	MGI:5424473	hm	increased systemic arterial blood pressure
Ddah1<tm1Pval>/Ddah1<tm1Pval>	involves: 129X1/SvJ	MGI:4415203	hm	partial embryonic lethality before implantation
Ddah1<tm1Pval>/Ddah1<tm1Pval>	involves: 129X1/SvJ * C57BL/6	MGI:3712060	hm	complete prenatal lethality
Dio2<tm1Vag>/Dio2<tm1Vag>	involves: 129S7/SvEvBrd * C57BL/6	MGI:3613455	hm	abnormal feces composition
Dio2<tm1Vag>/Dio2<tm1Vag>	involves: 129S7/SvEvBrd * C57BL/6	MGI:3613455	hm	abnormal thyroid-stimulating hormone level
Dio2<tm1Vag>/Dio2<tm1Vag>	involves: 129S7/SvEvBrd * C57BL/6	MGI:3613455	hm	abnormal urine homeostasis
Dio2<tm1Vag>/Dio2<tm1Vag>	involves: 129S7/SvEvBrd * C57BL/6	MGI:3613455	hm	decreased body weight
Dio2<tm1Vag>/Dio2<tm1Vag>	involves: 129S7/SvEvBrd * C57BL/6	MGI:3613455	hm	increased circulating thyroid-stimulating hormone level
Dio2<tm1Vag>/Dio2<tm1Vag>	involves: 129S7/SvEvBrd * C57BL/6	MGI:3613455	hm	increased circulating thyroxine level
Dio2<tm1Vag>/Dio2<tm1Vag>	involves: 129S7/SvEvBrd * C57BL/6	MGI:3613455	hm	postnatal growth retardation
Dpy19l3<tm1a(EUCOMM)Wtsi>/Dpy19l3<tm1a(EUCOMM)Wtsi>	Not Specified	MGI:5450527	hm	abnormal digit morphology
Dpy19l3<tm1a(EUCOMM)Wtsi>/Dpy19l3<tm1a(EUCOMM)Wtsi>	Not Specified	MGI:5450527	hm	abnormal eye size
Dpy19l3<tm1a(EUCOMM)Wtsi>/Dpy19l3<tm1a(EUCOMM)Wtsi>	Not Specified	MGI:5450527	hm	decreased hematocrit
Dpy19l3<tm1a(EUCOMM)Wtsi>/Dpy19l3<tm1a(EUCOMM)Wtsi>	Not Specified	MGI:5450527	hm	increased hemoglobin content
Dtna<tm1Jrs>/Dtna<tm1Jrs>	involves: 129X1/SvJ * C57BL/6	MGI:2176869	hm	abnormal neuromuscular synapse morphology
Dtna<tm1Jrs>/Dtna<tm1Jrs>	involves: 129X1/SvJ * C57BL/6	MGI:2176869	hm	cardiac fibrosis
Dtna<tm1Jrs>/Dtna<tm1Jrs>	involves: 129X1/SvJ * C57BL/6	MGI:2176869	hm	cardiomyopathy
Dtna<tm1Jrs>/Dtna<tm1Jrs>	involves: 129X1/SvJ * C57BL/6	MGI:2176869	hm	decreased grip strength
Dtna<tm1Jrs>/Dtna<tm1Jrs>	involves: 129X1/SvJ * C57BL/6	MGI:2176869	hm	dystrophic muscle
Dtna<tm1Jrs>/Dtna<tm1Jrs>	involves: 129X1/SvJ * C57BL/6	MGI:2176869	hm	impaired coordination
Dtna<tm1Jrs>/Dtna<tm1Jrs>	involves: 129X1/SvJ * C57BL/6	MGI:2176869	hm	myocardial fiber degeneration
E2f6<tm1Hgmr>/E2f6<tm1Hgmr>	involves: 129P2/OlaHsd * C57BL/6	MGI:3582553	hm	no abnormal phenotype detected
E2f6<tm1Lees>/E2f6<tm1Lees>	involves: 129S4/SvJae * C57BL/6	MGI:3790808	hm	cellular phenotype
E2f6<tm1Lees>/E2f6<tm1Lees>	involves: 129S4/SvJae * C57BL/6	MGI:3790808	hm	cervical vertebral transformation
E2f6<tm1Lees>/E2f6<tm1Lees>	involves: 129S4/SvJae * C57BL/6	MGI:3790808	hm	hematopoietic system phenotype
E2f6<tm1Lees>/E2f6<tm1Lees>	involves: 129S4/SvJae * C57BL/6	MGI:3790808	hm	lumbar vertebral transformation
E2f6<tm1Lees>/E2f6<tm1Lees>	involves: 129S4/SvJae * C57BL/6	MGI:3790808	hm	thoracic vertebral transformation
E2f6<tm1Sgau>/E2f6<tm1Sgau>	involves: 129S4/SvJae * C57BL/6	MGI:3618144	hm	cellular phenotype
E2f6<tm1Sgau>/E2f6<tm1Sgau>	involves: 129S4/SvJae * C57BL/6	MGI:3618144	hm	Leydig cell hyperplasia
E2f6<tm1Sgau>/E2f6<tm1Sgau>	involves: 129S4/SvJae * C57BL/6	MGI:3618144	hm	lumbar vertebral transformation
E2f6<tm1Sgau>/E2f6<tm1Sgau>	involves: 129S4/SvJae * C57BL/6	MGI:3618144	hm	oligozoospermia
E2f6<tm1Sgau>/E2f6<tm1Sgau>	involves: 129S4/SvJae * C57BL/6	MGI:3618144	hm	thoracic vertebral transformation
Ednrb<tm1.1Yko>/Ednrb<tm1.1Yko>	involves: 129P2/OlaHsd * Bkl:BKW * C57BL/6 * SJL	MGI:3804906	hm	complete postnatal lethality
Ednrb<tm1.1Yko>/Ednrb<tm1.1Yko>	involves: 129P2/OlaHsd * Bkl:BKW * C57BL/6 * SJL	MGI:3804906	hm	decreased vasodilation
Ednrb<tm1.1Yko>/Ednrb<tm1.1Yko>	involves: 129P2/OlaHsd * Bkl:BKW * C57BL/6 * SJL	MGI:3804906	hm	intestinal obstruction
Ednrb<tm1.1Yko>/Ednrb<tm1.1Yko>	involves: 129P2/OlaHsd * Bkl:BKW * C57BL/6 * SJL	MGI:3804906	hm	white spotting
Ednrb<tm1Myks>/Ednrb<tm1Myks>	involves: 129P2/OlaHsd	MGI:3640501	hm	abnormal cell migration
Ednrb<tm1Myks>/Ednrb<tm1Myks>	involves: 129P2/OlaHsd	MGI:3640501	hm	absent coat pigmentation
Ednrb<tm1Myks>/Ednrb<tm1Myks>	involves: 129P2/OlaHsd	MGI:3640501	hm	megacolon
Ednrb<tm1Myks>/Ednrb<tm1Myks>	involves: 129P2/OlaHsd	MGI:3640501	hm	premature death
Ednrb<tm1Ywa>/Ednrb<tm1Ywa>	B6;129-Ednrb<tm1Ywa>/J	MGI:5617944	hm	abnormal colon goblet cell morphology
Ednrb<tm1Ywa>/Ednrb<tm1Ywa>	B6;129-Ednrb<tm1Ywa>/J	MGI:5617944	hm	abnormal colon morphology
Ednrb<tm1Ywa>/Ednrb<tm1Ywa>	B6;129-Ednrb<tm1Ywa>/J	MGI:5617944	hm	abnormal feces composition
Ednrb<tm1Ywa>/Ednrb<tm1Ywa>	B6;129-Ednrb<tm1Ywa>/J	MGI:5617944	hm	abnormal intestinal mucosa morphology
Ednrb<tm1Ywa>/Ednrb<tm1Ywa>	B6;129-Ednrb<tm1Ywa>/J	MGI:5617944	hm	abnormal intestine physiology
Ednrb<tm1Ywa>/Ednrb<tm1Ywa>	B6;129-Ednrb<tm1Ywa>/J	MGI:5617944	hm	abnormal large intestine crypts of Lieberkuhn morphology
Ednrb<tm1Ywa>/Ednrb<tm1Ywa>	B6;129-Ednrb<tm1Ywa>/J	MGI:5617944	hm	Hirschsprung Disease, Susceptibility to, 2
Ednrb<tm1Ywa>/Ednrb<tm1Ywa>	involves: 129S5/SvEvBrd	MGI:2174949	hm	abnormal choroid pigmentation
Ednrb<tm1Ywa>/Ednrb<tm1Ywa>	involves: 129S5/SvEvBrd	MGI:2174949	hm	abnormal coat/hair pigmentation
Ednrb<tm1Ywa>/Ednrb<tm1Ywa>	involves: 129S5/SvEvBrd	MGI:2174949	hm	abnormal hair follicle melanocyte morphology
Ednrb<tm1Ywa>/Ednrb<tm1Ywa>	involves: 129S5/SvEvBrd	MGI:2174949	hm	aganglionic megacolon
Ednrb<tm1Ywa>/Ednrb<tm1Ywa>	involves: 129S5/SvEvBrd	MGI:2174949	hm	cachexia
Ednrb<tm1Ywa>/Ednrb<tm1Ywa>	involves: 129S5/SvEvBrd	MGI:2174949	hm	decreased acute inflammation
Ednrb<tm1Ywa>/Ednrb<tm1Ywa>	involves: 129S5/SvEvBrd	MGI:2174949	hm	Hirschsprung Disease, Susceptibility to, 2
Ednrb<tm1Ywa>/Ednrb<tm1Ywa>	involves: 129S5/SvEvBrd	MGI:2174949	hm	hypoalgesia
Ednrb<tm1Ywa>/Ednrb<tm1Ywa>	involves: 129S5/SvEvBrd	MGI:2174949	hm	intestinal obstruction
Ednrb<tm1Ywa>/Ednrb<tm1Ywa>	involves: 129S5/SvEvBrd	MGI:2174949	hm	postnatal growth retardation
Ednrb<tm1Ywa>/Ednrb<tm1Ywa>	involves: 129S5/SvEvBrd	MGI:2174949	hm	premature death
Ednrb<tm1Ywa>/Ednrb<tm1Ywa>	involves: 129S5/SvEvBrd	MGI:2174949	hm	variable depigmentation
Ednrb<tm1Ywa>/Ednrb<tm1Ywa>	involves: 129S5/SvEvBrd	MGI:2174949	hm	Waardenburg Syndrome, Type 4A
Ednrb<tm1Ywa>/Ednrb<tm1Ywa>	involves: 129S5/SvEvBrd	MGI:2174949	hm	white spotting
Fgfr3<tm1Dor>/Fgfr3<tm1Dor>	CBA/Ca.129S6(B6)-Fgfr3<tm1Dor>	MGI:3696818	hm	abnormal cochlear hair cell morphology
Fgfr3<tm1Dor>/Fgfr3<tm1Dor>	CBA/Ca.129S6(B6)-Fgfr3<tm1Dor>	MGI:3696818	hm	abnormal cochlear sensory epithelium morphology
Fgfr3<tm1Dor>/Fgfr3<tm1Dor>	CBA/Ca.129S6(B6)-Fgfr3<tm1Dor>	MGI:3696818	hm	abnormal pillar cell differentiation
Fgfr3<tm1Dor>/Fgfr3<tm1Dor>	CBA/Ca.129S6(B6)-Fgfr3<tm1Dor>	MGI:3696818	hm	absent pillar cells
Fgfr3<tm1Dor>/Fgfr3<tm1Dor>	CBA/Ca.129S6(B6)-Fgfr3<tm1Dor>	MGI:3696818	hm	absent tunnel of Corti
Fgfr3<tm1Dor>/Fgfr3<tm1Dor>	CBA/Ca.129S6(B6)-Fgfr3<tm1Dor>	MGI:3696818	hm	increased cochlear outer hair cell number
Fgfr3<tm1Dor>/Fgfr3<tm1Dor>	CBA/Ca.129S6(B6)-Fgfr3<tm1Dor>	MGI:3696818	hm	increased Deiters cell number
Fgfr3<tm1Dor>/Fgfr3<tm1Dor>	CBA/Ca.129S6(B6)-Fgfr3<tm1Dor>	MGI:3696818	hm	increased or absent threshold for auditory brainstem response
Fgfr3<tm1Dor>/Fgfr3<tm1Dor>	CBA/Ca.129S6(B6)-Fgfr3<tm1Dor>	MGI:3696818	hm	sensorineural hearing loss
Fgfr3<tm1Dor>/Fgfr3<tm1Dor>	involves: 129S6/SvEvTac	MGI:3700940	hm	abnormal axial skeleton morphology
Fgfr3<tm1Dor>/Fgfr3<tm1Dor>	involves: 129S6/SvEvTac	MGI:3700940	hm	abnormal long bone epiphyseal plate morphology
Fgfr3<tm1Dor>/Fgfr3<tm1Dor>	involves: 129S6/SvEvTac	MGI:3700940	hm	increased width of hypertrophic chondrocyte zone
Fgfr3<tm1Dor>/Fgfr3<tm1Dor>	involves: 129S6/SvEvTac	MGI:3700940	hm	long femur
Fgfr3<tm1Dor>/Fgfr3<tm1Dor>	involves: 129S6/SvEvTac	MGI:3700940	hm	long humerus
Fgfr3<tm1Dor>/Fgfr3<tm1Dor>	involves: 129S6/SvEvTac	MGI:3700940	hm	long radius
Fgfr3<tm1Dor>/Fgfr3<tm1Dor>	involves: 129S6/SvEvTac	MGI:3700940	hm	long ulna
Fgfr3<tm1Dor>/Fgfr3<tm1Dor>	involves: 129S6/SvEvTac	MGI:3700940	hm	nervous system phenotype
Fgfr3<tm1Dor>/Fgfr3<tm1Dor>	involves: 129S6/SvEvTac * C57BL/6	MGI:3589422	hm	abnormal axial skeleton morphology
Fgfr3<tm1Dor>/Fgfr3<tm1Dor>	involves: 129S6/SvEvTac * C57BL/6	MGI:3589422	hm	abnormal cochlea morphology
Fgfr3<tm1Dor>/Fgfr3<tm1Dor>	involves: 129S6/SvEvTac * C57BL/6	MGI:3589422	hm	abnormal cochlear OHC efferent innervation pattern
Fgfr3<tm1Dor>/Fgfr3<tm1Dor>	involves: 129S6/SvEvTac * C57BL/6	MGI:3589422	hm	abnormal cochlear outer hair cell morphology
Fgfr3<tm1Dor>/Fgfr3<tm1Dor>	involves: 129S6/SvEvTac * C57BL/6	MGI:3589422	hm	abnormal femur morphology
Fgfr3<tm1Dor>/Fgfr3<tm1Dor>	involves: 129S6/SvEvTac * C57BL/6	MGI:3589422	hm	abnormal humerus morphology
Fgfr3<tm1Dor>/Fgfr3<tm1Dor>	involves: 129S6/SvEvTac * C57BL/6	MGI:3589422	hm	abnormal long bone hypertrophic chondrocyte zone
Fgfr3<tm1Dor>/Fgfr3<tm1Dor>	involves: 129S6/SvEvTac * C57BL/6	MGI:3589422	hm	abnormal long bone morphology
Fgfr3<tm1Dor>/Fgfr3<tm1Dor>	involves: 129S6/SvEvTac * C57BL/6	MGI:3589422	hm	abnormal organ of Corti morphology
Fgfr3<tm1Dor>/Fgfr3<tm1Dor>	involves: 129S6/SvEvTac * C57BL/6	MGI:3589422	hm	abnormal pillar cell differentiation
Fgfr3<tm1Dor>/Fgfr3<tm1Dor>	involves: 129S6/SvEvTac * C57BL/6	MGI:3589422	hm	abnormal rib morphology
Fgfr3<tm1Dor>/Fgfr3<tm1Dor>	involves: 129S6/SvEvTac * C57BL/6	MGI:3589422	hm	absent gastric milk in neonates
Fgfr3<tm1Dor>/Fgfr3<tm1Dor>	involves: 129S6/SvEvTac * C57BL/6	MGI:3589422	hm	absent pillar cells
Fgfr3<tm1Dor>/Fgfr3<tm1Dor>	involves: 129S6/SvEvTac * C57BL/6	MGI:3589422	hm	absent tunnel of Corti
Fgfr3<tm1Dor>/Fgfr3<tm1Dor>	involves: 129S6/SvEvTac * C57BL/6	MGI:3589422	hm	Achondroplasia
Fgfr3<tm1Dor>/Fgfr3<tm1Dor>	involves: 129S6/SvEvTac * C57BL/6	MGI:3589422	hm	bowed femur
Fgfr3<tm1Dor>/Fgfr3<tm1Dor>	involves: 129S6/SvEvTac * C57BL/6	MGI:3589422	hm	bowed humerus
Fgfr3<tm1Dor>/Fgfr3<tm1Dor>	involves: 129S6/SvEvTac * C57BL/6	MGI:3589422	hm	deafness
Fgfr3<tm1Dor>/Fgfr3<tm1Dor>	involves: 129S6/SvEvTac * C57BL/6	MGI:3589422	hm	decreased body weight
Fgfr3<tm1Dor>/Fgfr3<tm1Dor>	involves: 129S6/SvEvTac * C57BL/6	MGI:3589422	hm	enlarged vertebral body
Fgfr3<tm1Dor>/Fgfr3<tm1Dor>	involves: 129S6/SvEvTac * C57BL/6	MGI:3589422	hm	Hypochondroplasia
Fgfr3<tm1Dor>/Fgfr3<tm1Dor>	involves: 129S6/SvEvTac * C57BL/6	MGI:3589422	hm	increased Deiters cell number
Fgfr3<tm1Dor>/Fgfr3<tm1Dor>	involves: 129S6/SvEvTac * C57BL/6	MGI:3589422	hm	increased long bone epiphyseal plate size
Fgfr3<tm1Dor>/Fgfr3<tm1Dor>	involves: 129S6/SvEvTac * C57BL/6	MGI:3589422	hm	increased or absent threshold for auditory brainstem response
Fgfr3<tm1Dor>/Fgfr3<tm1Dor>	involves: 129S6/SvEvTac * C57BL/6	MGI:3589422	hm	increased width of hypertrophic chondrocyte zone
Fgfr3<tm1Dor>/Fgfr3<tm1Dor>	involves: 129S6/SvEvTac * C57BL/6	MGI:3589422	hm	kinked tail
Fgfr3<tm1Dor>/Fgfr3<tm1Dor>	involves: 129S6/SvEvTac * C57BL/6	MGI:3589422	hm	kyphosis
Fgfr3<tm1Dor>/Fgfr3<tm1Dor>	involves: 129S6/SvEvTac * C57BL/6	MGI:3589422	hm	long femur
Fgfr3<tm1Dor>/Fgfr3<tm1Dor>	involves: 129S6/SvEvTac * C57BL/6	MGI:3589422	hm	partial postnatal lethality
Fgfr3<tm1Dor>/Fgfr3<tm1Dor>	involves: 129S6/SvEvTac * C57BL/6	MGI:3589422	hm	premature death
Fgfr3<tm1Dor>/Fgfr3<tm1Dor>	involves: 129S6/SvEvTac * C57BL/6	MGI:3589422	hm	scoliosis
Fgfr3<tm1Dor>/Fgfr3<tm1Dor>	involves: 129S6/SvEvTac * C57BL/6	MGI:3589422	hm	sensorineural hearing loss
Fgfr3<tm1Dor>/Fgfr3<tm1Dor>	involves: 129S6/SvEvTac * C57BL/6	MGI:3589422	hm	small thoracic cavity
Fgfr3<tm1Led>/Fgfr3<tm1Led>	involves: 129S6/SvEvTac	MGI:3640392	hm	abnormal axial skeleton morphology
Fgfr3<tm1Led>/Fgfr3<tm1Led>	involves: 129S6/SvEvTac	MGI:3640392	hm	abnormal bone ossification
Fgfr3<tm1Led>/Fgfr3<tm1Led>	involves: 129S6/SvEvTac	MGI:3640392	hm	abnormal epiphyseal plate morphology
Fgfr3<tm1Led>/Fgfr3<tm1Led>	involves: 129S6/SvEvTac	MGI:3640392	hm	abnormal femur morphology
Fgfr3<tm1Led>/Fgfr3<tm1Led>	involves: 129S6/SvEvTac	MGI:3640392	hm	abnormal fibula morphology
Fgfr3<tm1Led>/Fgfr3<tm1Led>	involves: 129S6/SvEvTac	MGI:3640392	hm	abnormal gait
Fgfr3<tm1Led>/Fgfr3<tm1Led>	involves: 129S6/SvEvTac	MGI:3640392	hm	abnormal long bone epiphyseal plate proliferative zone
Fgfr3<tm1Led>/Fgfr3<tm1Led>	involves: 129S6/SvEvTac	MGI:3640392	hm	abnormal long bone hypertrophic chondrocyte zone
Fgfr3<tm1Led>/Fgfr3<tm1Led>	involves: 129S6/SvEvTac	MGI:3640392	hm	abnormal long bone morphology
Fgfr3<tm1Led>/Fgfr3<tm1Led>	involves: 129S6/SvEvTac	MGI:3640392	hm	abnormal spine curvature
Fgfr3<tm1Led>/Fgfr3<tm1Led>	involves: 129S6/SvEvTac	MGI:3640392	hm	abnormal tail morphology
Fgfr3<tm1Led>/Fgfr3<tm1Led>	involves: 129S6/SvEvTac	MGI:3640392	hm	abnormal thoracic vertebrae morphology
Fgfr3<tm1Led>/Fgfr3<tm1Led>	involves: 129S6/SvEvTac	MGI:3640392	hm	abnormal tibia morphology
Fgfr3<tm1Led>/Fgfr3<tm1Led>	involves: 129S6/SvEvTac	MGI:3640392	hm	abnormal vertebrae morphology
Fgfr3<tm1Led>/Fgfr3<tm1Led>	involves: 129S6/SvEvTac	MGI:3640392	hm	abnormal vertebral epiphyseal plate morphology
Fgfr3<tm1Led>/Fgfr3<tm1Led>	involves: 129S6/SvEvTac	MGI:3640392	hm	bowed femur
Fgfr3<tm1Led>/Fgfr3<tm1Led>	involves: 129S6/SvEvTac	MGI:3640392	hm	decreased body size
Fgfr3<tm1Led>/Fgfr3<tm1Led>	involves: 129S6/SvEvTac	MGI:3640392	hm	elongated vertebral body
Fgfr3<tm1Led>/Fgfr3<tm1Led>	involves: 129S6/SvEvTac	MGI:3640392	hm	increased diameter of femur
Fgfr3<tm1Led>/Fgfr3<tm1Led>	involves: 129S6/SvEvTac	MGI:3640392	hm	increased long bone epiphyseal plate size
Fgfr3<tm1Led>/Fgfr3<tm1Led>	involves: 129S6/SvEvTac	MGI:3640392	hm	increased osteoclast cell number
Fgfr3<tm1Led>/Fgfr3<tm1Led>	involves: 129S6/SvEvTac	MGI:3640392	hm	increased width of hypertrophic chondrocyte zone
Fgfr3<tm1Led>/Fgfr3<tm1Led>	involves: 129S6/SvEvTac	MGI:3640392	hm	kyphoscoliosis
Fgfr3<tm1Led>/Fgfr3<tm1Led>	involves: 129S6/SvEvTac	MGI:3640392	hm	kyphosis
Fgfr3<tm1Led>/Fgfr3<tm1Led>	involves: 129S6/SvEvTac	MGI:3640392	hm	long femur
Fgfr3<tm1Led>/Fgfr3<tm1Led>	involves: 129S6/SvEvTac	MGI:3640392	hm	long humerus
Fgfr3<tm1Led>/Fgfr3<tm1Led>	involves: 129S6/SvEvTac	MGI:3640392	hm	long tail
Fgfr3<tm1Led>/Fgfr3<tm1Led>	involves: 129S6/SvEvTac	MGI:3640392	hm	partial lethality at weaning
Fgfr3<tm1Led>/Fgfr3<tm1Led>	involves: 129S6/SvEvTac	MGI:3640392	hm	respiratory distress
Fgfr3<tm1Led>/Fgfr3<tm1Led>	involves: 129S6/SvEvTac	MGI:3640392	hm	scoliosis
Fgfr3<tm1Led>/Fgfr3<tm1Led>	involves: 129S6/SvEvTac	MGI:3640392	hm	wavy tail
Fgfr3<tm1Schl>/Fgfr3<tm1Schl>	involves: 129S1/Sv * CD-1 * FVB/N	MGI:3823046	hm	skeleton phenotype
Fgfr3<tm2Schl>/Fgfr3<tm2Schl>	involves: 129S1/Sv * CD-1 * FVB/N	MGI:3823047	hm	abnormal axial skeleton morphology
Fgfr3<tm2Schl>/Fgfr3<tm2Schl>	involves: 129S1/Sv * CD-1 * FVB/N	MGI:3823047	hm	abnormal bone structure
Fgfr3<tm2Schl>/Fgfr3<tm2Schl>	involves: 129S1/Sv * CD-1 * FVB/N	MGI:3823047	hm	abnormal long bone epiphyseal plate morphology
Fgfr3<tm2Schl>/Fgfr3<tm2Schl>	involves: 129S1/Sv * CD-1 * FVB/N	MGI:3823047	hm	abnormal long bone epiphyseal plate proliferative zone
Fgfr3<tm2Schl>/Fgfr3<tm2Schl>	involves: 129S1/Sv * CD-1 * FVB/N	MGI:3823047	hm	abnormal long bone morphology
Fgfr3<tm2Schl>/Fgfr3<tm2Schl>	involves: 129S1/Sv * CD-1 * FVB/N	MGI:3823047	hm	abnormal tail morphology
Fgfr3<tm2Schl>/Fgfr3<tm2Schl>	involves: 129S1/Sv * CD-1 * FVB/N	MGI:3823047	hm	abnormal trabecular bone morphology
Fgfr3<tm2Schl>/Fgfr3<tm2Schl>	involves: 129S1/Sv * CD-1 * FVB/N	MGI:3823047	hm	decreased bone mineral density
Fgfr3<tm2Schl>/Fgfr3<tm2Schl>	involves: 129S1/Sv * CD-1 * FVB/N	MGI:3823047	hm	decreased compact bone thickness
Fgfr3<tm2Schl>/Fgfr3<tm2Schl>	involves: 129S1/Sv * CD-1 * FVB/N	MGI:3823047	hm	increased width of hypertrophic chondrocyte zone
Fgfr3<tm2Schl>/Fgfr3<tm2Schl>	involves: 129S1/Sv * CD-1 * FVB/N	MGI:3823047	hm	kinked tail
Fgfr3<tm2Schl>/Fgfr3<tm2Schl>	involves: 129S1/Sv * CD-1 * FVB/N	MGI:3823047	hm	kyphosis
Fgfr3<tm2Schl>/Fgfr3<tm2Schl>	involves: 129S1/Sv * CD-1 * FVB/N	MGI:3823047	hm	long femur
Fgfr3<tm2Schl>/Fgfr3<tm2Schl>	involves: 129S1/Sv * CD-1 * FVB/N	MGI:3823047	hm	long humerus
Fgfr3<tm2Schl>/Fgfr3<tm2Schl>	involves: 129S1/Sv * CD-1 * FVB/N	MGI:3823047	hm	long limbs
Fgfr3<tm2Schl>/Fgfr3<tm2Schl>	involves: 129S1/Sv * CD-1 * FVB/N	MGI:3823047	hm	long tail
Fgfr3<tm2Schl>/Fgfr3<tm2Schl>	involves: 129S1/Sv * CD-1 * FVB/N	MGI:3823047	hm	long tibia
Fgfr3<tm2Schl>/Fgfr3<tm2Schl>	involves: 129S1/Sv * CD-1 * FVB/N	MGI:3823047	hm	long ulna
Fgfr3<tm6.2Cxd>/Fgfr3<tm6.2Cxd>	involves: 129S6/SvEvTac * FVB/N	MGI:4459836	hm	decreased bone mineral density
Fgfr3<tm6.2Cxd>/Fgfr3<tm6.2Cxd>	involves: 129S6/SvEvTac * FVB/N	MGI:4459836	hm	long femur
Fgfr3<tm6Cxd>/Fgfr3<tm6Cxd>	involves: 129S6/SvEvTac	MGI:4459831	hm	abnormal chondrocyte physiology
Fgfr3<tm6Cxd>/Fgfr3<tm6Cxd>	involves: 129S6/SvEvTac	MGI:4459831	hm	kinked tail
Fjx1<tm1Awp>/Fjx1<tm1Awp>	involves: 129X1/SvJ	MGI:3771958	hm	no abnormal phenotype detected
Fmn2<tm1Led>/Fmn2<tm1Led>	either: (involves: 129S6/SvEvTac) or (involves: 129S6/SvEvTac * Black Swiss)	MGI:2654511	hm	abnormal female meiosis
Fmn2<tm1Led>/Fmn2<tm1Led>	either: (involves: 129S6/SvEvTac) or (involves: 129S6/SvEvTac * Black Swiss)	MGI:2654511	hm	abnormal nursing
Fmn2<tm1Led>/Fmn2<tm1Led>	either: (involves: 129S6/SvEvTac) or (involves: 129S6/SvEvTac * Black Swiss)	MGI:2654511	hm	abnormal oocyte morphology
Fmn2<tm1Led>/Fmn2<tm1Led>	either: (involves: 129S6/SvEvTac) or (involves: 129S6/SvEvTac * Black Swiss)	MGI:2654511	hm	abnormal pregnancy
Fmn2<tm1Led>/Fmn2<tm1Led>	either: (involves: 129S6/SvEvTac) or (involves: 129S6/SvEvTac * Black Swiss)	MGI:2654511	hm	abnormal primary polar body morphology
Fmn2<tm1Led>/Fmn2<tm1Led>	either: (involves: 129S6/SvEvTac) or (involves: 129S6/SvEvTac * Black Swiss)	MGI:2654511	hm	reduced female fertility
Gfap<tm1Ito>/Gfap<tm1Ito>	involves: 129P2/OlaHsd * C57BL/6J	MGI:2677142	hm	abnormal excitatory postsynaptic potential
Gfap<tm1Ito>/Gfap<tm1Ito>	involves: 129P2/OlaHsd * C57BL/6J	MGI:2677142	hm	abnormal eye blink conditioning behavior
Gfap<tm1Ito>/Gfap<tm1Ito>	involves: 129P2/OlaHsd * C57BL/6J	MGI:2677142	hm	behavior/neurological phenotype
Gfap<tm1Ito>/Gfap<tm1Ito>	involves: 129P2/OlaHsd * C57BL/6J	MGI:2677142	hm	nervous system phenotype
Gfap<tm1Ito>/Gfap<tm1Ito>	involves: 129P2/OlaHsd * C57BL/6J	MGI:2677142	hm	reduced long term depression
Gfap<tm1Ldtk>/Gfap<tm1Ldtk>	involves: 129P2/OlaHsd * C57BL/6	MGI:2677143	hm	abnormal astrocyte morphology
Gfap<tm1Ldtk>/Gfap<tm1Ldtk>	involves: 129P2/OlaHsd * C57BL/6	MGI:2677143	hm	abnormal blood-brain barrier function
Gfap<tm1Ldtk>/Gfap<tm1Ldtk>	involves: 129P2/OlaHsd * C57BL/6	MGI:2677143	hm	abnormal blood vessel morphology
Gfap<tm1Ldtk>/Gfap<tm1Ldtk>	involves: 129P2/OlaHsd * C57BL/6	MGI:2677143	hm	abnormal brain white matter morphology
Gfap<tm1Ldtk>/Gfap<tm1Ldtk>	involves: 129P2/OlaHsd * C57BL/6	MGI:2677143	hm	abnormal myelination
Gfap<tm1Ldtk>/Gfap<tm1Ldtk>	involves: 129P2/OlaHsd * C57BL/6	MGI:2677143	hm	abnormal oligodendrocyte morphology
Gfap<tm1Ldtk>/Gfap<tm1Ldtk>	involves: 129P2/OlaHsd * C57BL/6	MGI:2677143	hm	abnormal oligodendrocyte physiology
Gfap<tm1Ldtk>/Gfap<tm1Ldtk>	involves: 129P2/OlaHsd * C57BL/6	MGI:2677143	hm	decreased corpus callosum size
Gfap<tm1Ldtk>/Gfap<tm1Ldtk>	involves: 129P2/OlaHsd * C57BL/6	MGI:2677143	hm	non-obstructive hydrocephaly
Gfap<tm1Mes>/Gfap<tm1Mes>	either: (involves: 129S7/SvEvBrd * 129X1/SvJ) or (involves: 129S7/SvEvBrd * C57BL/6)	MGI:2677145	hm	abnormal astrocyte morphology
Gfap<tm1Mes>/Gfap<tm1Mes>	either: (involves: 129S7/SvEvBrd * 129X1/SvJ) or (involves: 129S7/SvEvBrd * C57BL/6)	MGI:2677145	hm	enhanced long term potentiation
Gfap<tm1Mes>/Gfap<tm1Mes>	either: (involves: 129S7/SvEvBrd * 129X1/SvJ) or (involves: 129S7/SvEvBrd * C57BL/6)	MGI:2677145	hm	increased susceptibility to injury
Gfap<tm1Pkny>/Gfap<tm1Pkny>	involves: 129P2/OlaHsd * C57BL/6J	MGI:2677146	hm	abnormal astrocyte morphology
Gfap<tm1Pkny>/Gfap<tm1Pkny>	involves: 129P2/OlaHsd * C57BL/6J	MGI:2677146	hm	behavior/neurological phenotype
Gfap<tm1Pkny>/Gfap<tm1Pkny>	involves: 129P2/OlaHsd * C57BL/6J	MGI:2677146	hm	cellular phenotype
Gfap<tm1Pkny>/Gfap<tm1Pkny>	involves: 129P2/OlaHsd * C57BL/6J	MGI:2677146	hm	digestive/alimentary phenotype
Gfap<tm1Pkny>/Gfap<tm1Pkny>	involves: 129P2/OlaHsd * C57BL/6J	MGI:2677146	hm	nervous system phenotype
Gjb6<tm1.1Mcsa>/Gjb6<tm1.1Mcsa>	involves: 129 * BALB/c * C57BL/6	MGI:5486679	hm	hearing/vestibular/ear phenotype
Gjb6<tm1Kwi>/Gjb6<tm1Kwi>	involves: 129P2/OlaHsd	MGI:4848188	hm	deafness
Gjb6<tm1Kwi>/Gjb6<tm1Kwi>	involves: 129P2/OlaHsd	MGI:4848188	hm	decreased endocochlear potential
Gjb6<tm1Kwi>/Gjb6<tm1Kwi>	involves: 129P2/OlaHsd	MGI:4848188	hm	increased or absent threshold for auditory brainstem response
Gjb6<tm1Kwi>/Gjb6<tm1Kwi>	involves: 129P2/OlaHsd * C57BL/6	MGI:3037831	hm	abnormal amino acid level
Gjb6<tm1Kwi>/Gjb6<tm1Kwi>	involves: 129P2/OlaHsd * C57BL/6	MGI:3037831	hm	abnormal blood-inner ear barrier function
Gjb6<tm1Kwi>/Gjb6<tm1Kwi>	involves: 129P2/OlaHsd * C57BL/6	MGI:3037831	hm	abnormal cochlear endolymph ionic homeostasis
Gjb6<tm1Kwi>/Gjb6<tm1Kwi>	involves: 129P2/OlaHsd * C57BL/6	MGI:3037831	hm	abnormal hair cell physiology
Gjb6<tm1Kwi>/Gjb6<tm1Kwi>	involves: 129P2/OlaHsd * C57BL/6	MGI:3037831	hm	abnormal stria vascularis morphology
Gjb6<tm1Kwi>/Gjb6<tm1Kwi>	involves: 129P2/OlaHsd * C57BL/6	MGI:3037831	hm	abnormal stria vascularis vasculature morphology
Gjb6<tm1Kwi>/Gjb6<tm1Kwi>	involves: 129P2/OlaHsd * C57BL/6	MGI:3037831	hm	absent endocochlear potential
Gjb6<tm1Kwi>/Gjb6<tm1Kwi>	involves: 129P2/OlaHsd * C57BL/6	MGI:3037831	hm	absent pinna reflex
Gjb6<tm1Kwi>/Gjb6<tm1Kwi>	involves: 129P2/OlaHsd * C57BL/6	MGI:3037831	hm	cochlear hair cell degeneration
Gjb6<tm1Kwi>/Gjb6<tm1Kwi>	involves: 129P2/OlaHsd * C57BL/6	MGI:3037831	hm	cochlear inner hair cell degeneration
Gjb6<tm1Kwi>/Gjb6<tm1Kwi>	involves: 129P2/OlaHsd * C57BL/6	MGI:3037831	hm	cochlear outer hair cell degeneration
Gjb6<tm1Kwi>/Gjb6<tm1Kwi>	involves: 129P2/OlaHsd * C57BL/6	MGI:3037831	hm	deafness
Gjb6<tm1Kwi>/Gjb6<tm1Kwi>	involves: 129P2/OlaHsd * C57BL/6	MGI:3037831	hm	Deafness, Autosomal Recessive 1A
Gjb6<tm1Kwi>/Gjb6<tm1Kwi>	involves: 129P2/OlaHsd * C57BL/6	MGI:3037831	hm	decreased endocochlear potential
Gjb6<tm1Kwi>/Gjb6<tm1Kwi>	involves: 129P2/OlaHsd * C57BL/6	MGI:3037831	hm	immune system phenotype
Gjb6<tm1Kwi>/Gjb6<tm1Kwi>	involves: 129P2/OlaHsd * C57BL/6	MGI:3037831	hm	increased or absent threshold for auditory brainstem response
Gjb6<tm1Kwi>/Gjb6<tm1Kwi>	involves: 129P2/OlaHsd * C57BL/6	MGI:3037831	hm	organ of Corti degeneration
Gjb6<tm1Kwi>/Gjb6<tm1Kwi>	involves: 129P2/OlaHsd * C57BL/6	MGI:3037831	hm	sensorineural hearing loss
Gjb6<tm1Kwi>/Gjb6<tm1Kwi>	involves: 129P2/OlaHsd * C57BL/6J	MGI:3043966	hm	abnormal nervous system physiology
Gjb6<tm1Kwi>/Gjb6<tm1Kwi>	involves: 129P2/OlaHsd * C57BL/6J	MGI:3043966	hm	decreased vertical activity
Gjb6<tm1Kwi>/Gjb6<tm1Kwi>	involves: 129P2/OlaHsd * C57BL/6J	MGI:3043966	hm	increased anxiety-related response
Gjb6<tm1Kwi>/Gjb6<tm1Kwi>	involves: 129P2/OlaHsd * C57BL/6J	MGI:3043966	hm	nervous system phenotype
Gldc<tm1a(EUCOMM)Wtsi>/Gldc<tm1a(EUCOMM)Wtsi>	C57BL/6N-Gldc<tm1a(EUCOMM)Wtsi>/Wtsi	MGI:5631170	hm	complete preweaning lethality
Gpc5<tm1a(KOMP)Wtsi>/Gpc5<tm1a(KOMP)Wtsi>	C57BL/6N-Gpc5<tm1a(KOMP)Wtsi>/Wtsi	MGI:5608464	hm	abnormal rib morphology
Gpc5<tm1a(KOMP)Wtsi>/Gpc5<tm1a(KOMP)Wtsi>	C57BL/6N-Gpc5<tm1a(KOMP)Wtsi>/Wtsi	MGI:5608464	hm	decreased circulating phosphate level
Gpr37l1<tm1.2Gtva>/Gpr37l1<tm1.2Gtva>	involves: 129S/SvEv * BALB/c * C57BL/6J	MGI:5512669	hm	abnormal Bergmann glial cell differentiation
Gpr37l1<tm1.2Gtva>/Gpr37l1<tm1.2Gtva>	involves: 129S/SvEv * BALB/c * C57BL/6J	MGI:5512669	hm	abnormal cerebellar layer morphology
Gpr37l1<tm1.2Gtva>/Gpr37l1<tm1.2Gtva>	involves: 129S/SvEv * BALB/c * C57BL/6J	MGI:5512669	hm	abnormal cerebellar molecular layer
Gpr37l1<tm1.2Gtva>/Gpr37l1<tm1.2Gtva>	involves: 129S/SvEv * BALB/c * C57BL/6J	MGI:5512669	hm	abnormal cerebellum external granule cell layer morphology
Gpr37l1<tm1.2Gtva>/Gpr37l1<tm1.2Gtva>	involves: 129S/SvEv * BALB/c * C57BL/6J	MGI:5512669	hm	abnormal locomotor activation
Gpr37l1<tm1.2Gtva>/Gpr37l1<tm1.2Gtva>	involves: 129S/SvEv * BALB/c * C57BL/6J	MGI:5512669	hm	abnormal motor learning
Gpr37l1<tm1.2Gtva>/Gpr37l1<tm1.2Gtva>	involves: 129S/SvEv * BALB/c * C57BL/6J	MGI:5512669	hm	abnormal neuronal precursor proliferation
Gpr37l1<tm1.2Gtva>/Gpr37l1<tm1.2Gtva>	involves: 129S/SvEv * BALB/c * C57BL/6J	MGI:5512669	hm	abnormal Purkinje cell differentiation
Gpr37l1<tm1.2Gtva>/Gpr37l1<tm1.2Gtva>	involves: 129S/SvEv * BALB/c * C57BL/6J	MGI:5512669	hm	early eyelid opening
Gpr37l1<tm1.2Gtva>/Gpr37l1<tm1.2Gtva>	involves: 129S/SvEv * BALB/c * C57BL/6J	MGI:5512669	hm	enhanced coordination
Gpr37l1<tm1.2Gtva>/Gpr37l1<tm1.2Gtva>	involves: 129S/SvEv * BALB/c * C57BL/6J	MGI:5512669	hm	thin external granule cell layer
Gpr37l1<tm1Lex>/Gpr37l1<tm1Lex>	involves: 129S5/SvEvBrd * C57BL/6J	MGI:3609959	hm	no abnormal phenotype detected
Gprc5b<tm1Yhir>/Gprc5b<tm1Yhir>	B6.Cg-Gprc5b<tm1Yhir>	MGI:5293389	hm	abnormal behavior
Gprc5b<tm1Yhir>/Gprc5b<tm1Yhir>	B6.Cg-Gprc5b<tm1Yhir>	MGI:5293389	hm	hypoactivity
Gprc5b<tm1Yhir>/Gprc5b<tm1Yhir>	B6.Cg-Gprc5b<tm1Yhir>	MGI:5293389	hm	partial neonatal lethality
Gprc5b<tm1Yhir>/Gprc5b<tm1Yhir>	B6.Cg-Gprc5b<tm1Yhir>	MGI:5293389	hm	partial postnatal lethality
Grin2c<tm1Bnno>/Grin2c<tm1Bnno>	involves: 129S6/SvEvTac * FVB/N	MGI:3718379	hm	no abnormal phenotype detected
Grin2c<tm1(Grin2b)Ulme>/Grin2c<tm1(Grin2b)Ulme>	involves: 129X1/SvJ * C57BL/6	MGI:3513828	hm	abnormal cerebellar molecular layer
Grin2c<tm1(Grin2b)Ulme>/Grin2c<tm1(Grin2b)Ulme>	involves: 129X1/SvJ * C57BL/6	MGI:3513828	hm	impaired coordination
Grin2c<tm1(Grin2b)Ulme>/Grin2c<tm1(Grin2b)Ulme>	involves: 129X1/SvJ * C57BL/6	MGI:3513828	hm	thin cerebellar granule layer
Grin2c<tm1(Grin2b)Ulme>/Grin2c<tm1(Grin2b)Ulme>	involves: 129X1/SvJ * C57BL/6	MGI:3513828	hm	thin cerebellar molecular layer
Grin2c<tm1Mwa>/Grin2c<tm1Mwa>	involves: C57BL/6 * CBA	MGI:3055022	hm	no abnormal phenotype detected
Grin2c<tm1Nak>/Grin2c<tm1Nak>	involves: 129S/SvEv	MGI:4360541	hm	abnormal excitatory postsynaptic currents
Grin2c<tm1Nak>/Grin2c<tm1Nak>	involves: 129S/SvEv	MGI:4360541	hm	abnormal miniature excitatory postsynaptic currents
Grin2c<tm1Nak>/Grin2c<tm1Nak>	involves: 129S/SvEv	MGI:4360541	hm	behavior/neurological phenotype
Grin2c<tm1Nak>/Grin2c<tm1Nak>	involves: 129S/SvEv	MGI:4360541	hm	decreased vertical activity
Grin2c<tm1Nak>/Grin2c<tm1Nak>	involves: 129S/SvEv	MGI:4360541	hm	nervous system phenotype
Grin2c<tm1Nts>/Grin2c<tm1Nts>	involves: 129S2/SvPas * C57BL/6J	MGI:4415152	hm	abnormal CNS synaptic transmission
Grin2c<tm1Nts>/Grin2c<tm1Nts>	involves: 129S2/SvPas * C57BL/6J	MGI:4415152	hm	abnormal NMDA-mediated synaptic currents
Grin2c<tm1Rsp>/Grin2c<tm1Rsp>	involves: 129S1/Sv * 129X1/SvJ	MGI:3847252	hm	impaired balance
Grin2c<tm2Rsp>/Grin2c<tm2Rsp>	involves: 129S1/Sv * 129X1/SvJ	MGI:3850692	hm	impaired balance
Grin3a<tm1Lex>/Grin3a<tm1Lex>	involves: 129S5/SvEvBrd * C57BL/6J	MGI:3609937	hm	no abnormal phenotype detected
Grin3a<tm1Nnk>/Grin3a<tm1Nnk>	either: (involves: 129S/SvEv * 129X1/SvJ) or (involves: 129X1/SvJ * Black Swiss)	MGI:3639146	hm	abnormal dendrite morphology
Grin3a<tm1Nnk>/Grin3a<tm1Nnk>	either: (involves: 129S/SvEv * 129X1/SvJ) or (involves: 129X1/SvJ * Black Swiss)	MGI:3639146	hm	abnormal eye electrophysiology
Grin3a<tm1Nnk>/Grin3a<tm1Nnk>	either: (involves: 129S/SvEv * 129X1/SvJ) or (involves: 129X1/SvJ * Black Swiss)	MGI:3639146	hm	abnormal single cell response
Grin3a<tm1Nnk>/Grin3a<tm1Nnk>	involves: 129X1/SvJ * Black Swiss * C57BL/6	MGI:3639147	hm	abnormal prepulse inhibition
Grin3a<tm1Nnk>/Grin3a<tm1Nnk>	involves: 129X1/SvJ * Black Swiss * C57BL/6	MGI:3639147	hm	behavior/neurological phenotype
Grm3<tm1Ddsc>/Grm3<tm1Ddsc>	involves: 129S1/Sv * 129X1/SvJ * CD-1	MGI:3690070	hm	abnormal anxiety-related response
Grm3<tm1Dgen>/Grm3<tm1Dgen>	involves: 129P2/OlaHsd * C57BL/6	MGI:3606472	hm	no abnormal phenotype detected
Grm3<tm1Vbn>/Grm3<tm1Vbn>	B6.129P2-Grm3<tm1Vbn>	MGI:5559018	hm	abnormal astrocyte physiology
Grm3<tm1Vbn>/Grm3<tm1Vbn>	B6.129P2-Grm3<tm1Vbn>	MGI:5559018	hm	abnormal neuron physiology
Hapln1<tm1Nid>/Hapln1<tm1Nid>	involves: 129S1/Sv * 129X1/SvJ	MGI:3038695	hm	abnormal basicranium morphology
Hapln1<tm1Nid>/Hapln1<tm1Nid>	involves: 129S1/Sv * 129X1/SvJ	MGI:3038695	hm	abnormal cartilage development
Hapln1<tm1Nid>/Hapln1<tm1Nid>	involves: 129S1/Sv * 129X1/SvJ	MGI:3038695	hm	abnormal limb bone morphology
Hapln1<tm1Nid>/Hapln1<tm1Nid>	involves: 129S1/Sv * 129X1/SvJ	MGI:3038695	hm	abnormal long bone epiphysis morphology
Hapln1<tm1Nid>/Hapln1<tm1Nid>	involves: 129S1/Sv * 129X1/SvJ	MGI:3038695	hm	abnormal long bone hypertrophic chondrocyte zone
Hapln1<tm1Nid>/Hapln1<tm1Nid>	involves: 129S1/Sv * 129X1/SvJ	MGI:3038695	hm	abnormal long bone metaphysis morphology
Hapln1<tm1Nid>/Hapln1<tm1Nid>	involves: 129S1/Sv * 129X1/SvJ	MGI:3038695	hm	abnormal Meckel's cartilage morphology
Hapln1<tm1Nid>/Hapln1<tm1Nid>	involves: 129S1/Sv * 129X1/SvJ	MGI:3038695	hm	abnormal middle ear ossicle morphology
Hapln1<tm1Nid>/Hapln1<tm1Nid>	involves: 129S1/Sv * 129X1/SvJ	MGI:3038695	hm	abnormal skeleton morphology
Hapln1<tm1Nid>/Hapln1<tm1Nid>	involves: 129S1/Sv * 129X1/SvJ	MGI:3038695	hm	decreased length of long bones
Hapln1<tm1Nid>/Hapln1<tm1Nid>	involves: 129S1/Sv * 129X1/SvJ	MGI:3038695	hm	disproportionate dwarf
Hapln1<tm1Nid>/Hapln1<tm1Nid>	involves: 129S1/Sv * 129X1/SvJ	MGI:3038695	hm	flat face
Hapln1<tm1Nid>/Hapln1<tm1Nid>	involves: 129S1/Sv * 129X1/SvJ	MGI:3038695	hm	lordosis
Hapln1<tm1Nid>/Hapln1<tm1Nid>	involves: 129S1/Sv * 129X1/SvJ	MGI:3038695	hm	partial neonatal lethality
Hapln1<tm1Nid>/Hapln1<tm1Nid>	involves: 129S1/Sv * 129X1/SvJ	MGI:3038695	hm	platyspondylia
Hapln1<tm1Nid>/Hapln1<tm1Nid>	involves: 129S1/Sv * 129X1/SvJ	MGI:3038695	hm	short scapula
Hapln1<tm1Nid>/Hapln1<tm1Nid>	involves: 129S1/Sv * 129X1/SvJ	MGI:3038695	hm	short snout
Hapln1<tm1Nid>/Hapln1<tm1Nid>	involves: 129S1/Sv * 129X1/SvJ	MGI:3038695	hm	Spondyloepiphyseal Dysplasia Congenita
Hepacam<tm1.2Tjj>/Hepacam<tm1.2Tjj>	involves: C57BL/6NTac	MGI:5646502	hm	abnormal glial cell physiology
Hepacam<tm1.2Tjj>/Hepacam<tm1.2Tjj>	involves: C57BL/6NTac	MGI:5646502	hm	abnormal myelin sheath morphology
Hepacam<tm1.2Tjj>/Hepacam<tm1.2Tjj>	involves: C57BL/6NTac	MGI:5646502	hm	abnormal oligodendrocyte physiology
Hepacam<tm1.2Tjj>/Hepacam<tm1.2Tjj>	involves: C57BL/6NTac	MGI:5646502	hm	brain vacuoles
Hes5<tm1Fgu>/Hes5<tm1Fgu>	involves: 129S1/Sv * 129X1/SvJ * CD-1	MGI:2172826	hm	abnormal inner ear vestibule morphology
Hes5<tm1Fgu>/Hes5<tm1Fgu>	involves: 129S1/Sv * 129X1/SvJ * CD-1	MGI:2172826	hm	abnormal Muller cell morphology
Hes5<tm1Fgu>/Hes5<tm1Fgu>	involves: 129S1/Sv * 129X1/SvJ * CD-1	MGI:2172826	hm	abnormal neuron morphology
Hes5<tm1Fgu>/Hes5<tm1Fgu>	involves: 129S1/Sv * 129X1/SvJ * CD-1	MGI:2172826	hm	abnormal utricle morphology
Hes5<tm1Fgu>/Hes5<tm1Fgu>	involves: 129S1/Sv * 129X1/SvJ * CD-1	MGI:2172826	hm	abnormal vestibular saccule morphology
Hes5<tm1Fgu>/Hes5<tm1Fgu>	involves: 129S1/Sv * 129X1/SvJ * CD-1	MGI:2172826	hm	increased cochlear inner hair cell number
Hes5<tm1Fgu>/Hes5<tm1Fgu>	involves: 129S1/Sv * 129X1/SvJ * CD-1	MGI:2172826	hm	increased cochlear outer hair cell number
Hes5<tm1Fgu>/Hes5<tm1Fgu>	involves: 129S1/Sv * 129X1/SvJ * CD-1	MGI:2172826	hm	increased vestibular hair cell number
Htra1<tm1Ybf>/Htra1<tm1Ybf>	involves: C57BL/6J	MGI:5285552	hm	vision/eye phenotype
Hus1<tm1.1Rsw>/Hus1<tm1.1Rsw>	involves: 129S4/SvJaeSor * 129S6/SvEvTac	MGI:3590175	hm	abnormal developmental patterning
Hus1<tm1.1Rsw>/Hus1<tm1.1Rsw>	involves: 129S4/SvJaeSor * 129S6/SvEvTac	MGI:3590175	hm	abnormal embryo turning
Hus1<tm1.1Rsw>/Hus1<tm1.1Rsw>	involves: 129S4/SvJaeSor * 129S6/SvEvTac	MGI:3590175	hm	abnormal neural tube morphology/development
Hus1<tm1.1Rsw>/Hus1<tm1.1Rsw>	involves: 129S4/SvJaeSor * 129S6/SvEvTac	MGI:3590175	hm	abnormal somite development
Hus1<tm1.1Rsw>/Hus1<tm1.1Rsw>	involves: 129S4/SvJaeSor * 129S6/SvEvTac	MGI:3590175	hm	abnormal vitelline vasculature morphology
Hus1<tm1.1Rsw>/Hus1<tm1.1Rsw>	involves: 129S4/SvJaeSor * 129S6/SvEvTac	MGI:3590175	hm	complete embryonic lethality during organogenesis
Hus1<tm1.1Rsw>/Hus1<tm1.1Rsw>	involves: 129S4/SvJaeSor * 129S6/SvEvTac	MGI:3590175	hm	decreased embryo size
Hus1<tm1.1Rsw>/Hus1<tm1.1Rsw>	involves: 129S4/SvJaeSor * 129S6/SvEvTac	MGI:3590175	hm	embryonic growth arrest
Hus1<tm1.1Rsw>/Hus1<tm1.1Rsw>	involves: 129S4/SvJaeSor * 129S6/SvEvTac	MGI:3590175	hm	embryonic growth retardation
Hus1<tm1.1Rsw>/Hus1<tm1.1Rsw>	involves: 129S4/SvJaeSor * 129S6/SvEvTac	MGI:3590175	hm	failure of chorioallantoic fusion
Hus1<tm1.1Rsw>/Hus1<tm1.1Rsw>	involves: 129S4/SvJaeSor * 129S6/SvEvTac	MGI:3590175	hm	incomplete rostral neuropore closure
Hus1<tm1.1Rsw>/Hus1<tm1.1Rsw>	involves: 129S4/SvJaeSor * 129S6/SvEvTac	MGI:3590175	hm	increased embryonic tissue cell apoptosis
Hus1<tm1.1Rsw>/Hus1<tm1.1Rsw>	involves: 129S4/SvJaeSor * 129S6/SvEvTac	MGI:3590175	hm	kinked neural tube
Hus1<tm1Led>/Hus1<tm1Led>	either: (involves: 129S6/SvEvTac) or (involves: 129S6/SvEvTac * Black Swiss)	MGI:2179049	hm	abnormal allantois morphology
Hus1<tm1Led>/Hus1<tm1Led>	either: (involves: 129S6/SvEvTac) or (involves: 129S6/SvEvTac * Black Swiss)	MGI:2179049	hm	abnormal embryonic hematopoiesis
Hus1<tm1Led>/Hus1<tm1Led>	either: (involves: 129S6/SvEvTac) or (involves: 129S6/SvEvTac * Black Swiss)	MGI:2179049	hm	abnormal placenta labyrinth morphology
Hus1<tm1Led>/Hus1<tm1Led>	either: (involves: 129S6/SvEvTac) or (involves: 129S6/SvEvTac * Black Swiss)	MGI:2179049	hm	abnormal placental labyrinth vasculature morphology
Hus1<tm1Led>/Hus1<tm1Led>	either: (involves: 129S6/SvEvTac) or (involves: 129S6/SvEvTac * Black Swiss)	MGI:2179049	hm	abnormal somite development
Hus1<tm1Led>/Hus1<tm1Led>	either: (involves: 129S6/SvEvTac) or (involves: 129S6/SvEvTac * Black Swiss)	MGI:2179049	hm	abnormal somite shape
Hus1<tm1Led>/Hus1<tm1Led>	either: (involves: 129S6/SvEvTac) or (involves: 129S6/SvEvTac * Black Swiss)	MGI:2179049	hm	abnormal visceral yolk sac blood island morphology
Hus1<tm1Led>/Hus1<tm1Led>	either: (involves: 129S6/SvEvTac) or (involves: 129S6/SvEvTac * Black Swiss)	MGI:2179049	hm	abnormal visceral yolk sac morphology
Hus1<tm1Led>/Hus1<tm1Led>	either: (involves: 129S6/SvEvTac) or (involves: 129S6/SvEvTac * Black Swiss)	MGI:2179049	hm	abnormal vitelline vasculature morphology
Hus1<tm1Led>/Hus1<tm1Led>	either: (involves: 129S6/SvEvTac) or (involves: 129S6/SvEvTac * Black Swiss)	MGI:2179049	hm	absent fibroblast proliferation
Hus1<tm1Led>/Hus1<tm1Led>	either: (involves: 129S6/SvEvTac) or (involves: 129S6/SvEvTac * Black Swiss)	MGI:2179049	hm	absent limb buds
Hus1<tm1Led>/Hus1<tm1Led>	either: (involves: 129S6/SvEvTac) or (involves: 129S6/SvEvTac * Black Swiss)	MGI:2179049	hm	chromosome breakage
Hus1<tm1Led>/Hus1<tm1Led>	either: (involves: 129S6/SvEvTac) or (involves: 129S6/SvEvTac * Black Swiss)	MGI:2179049	hm	complete embryonic lethality during organogenesis
Hus1<tm1Led>/Hus1<tm1Led>	either: (involves: 129S6/SvEvTac) or (involves: 129S6/SvEvTac * Black Swiss)	MGI:2179049	hm	decreased embryo size
Hus1<tm1Led>/Hus1<tm1Led>	either: (involves: 129S6/SvEvTac) or (involves: 129S6/SvEvTac * Black Swiss)	MGI:2179049	hm	embryonic growth retardation
Hus1<tm1Led>/Hus1<tm1Led>	either: (involves: 129S6/SvEvTac) or (involves: 129S6/SvEvTac * Black Swiss)	MGI:2179049	hm	failure of chorioallantoic fusion
Hus1<tm1Led>/Hus1<tm1Led>	either: (involves: 129S6/SvEvTac) or (involves: 129S6/SvEvTac * Black Swiss)	MGI:2179049	hm	failure of initiation of embryo turning
Hus1<tm1Led>/Hus1<tm1Led>	either: (involves: 129S6/SvEvTac) or (involves: 129S6/SvEvTac * Black Swiss)	MGI:2179049	hm	incomplete rostral neuropore closure
Hus1<tm1Led>/Hus1<tm1Led>	either: (involves: 129S6/SvEvTac) or (involves: 129S6/SvEvTac * Black Swiss)	MGI:2179049	hm	increased embryonic tissue cell apoptosis
Hus1<tm1Led>/Hus1<tm1Led>	either: (involves: 129S6/SvEvTac) or (involves: 129S6/SvEvTac * Black Swiss)	MGI:2179049	hm	kinked neural tube
Hus1<tm1Led>/Hus1<tm1Led>	involves: 129S6/SvEvTac	MGI:3590176	hm	abnormal developmental patterning
Hus1<tm1Led>/Hus1<tm1Led>	involves: 129S6/SvEvTac	MGI:3590176	hm	abnormal neural tube morphology/development
Hus1<tm1Led>/Hus1<tm1Led>	involves: 129S6/SvEvTac	MGI:3590176	hm	decreased embryo size
Hus1<tm1Led>/Hus1<tm1Led>	involves: 129S6/SvEvTac	MGI:3590176	hm	embryonic growth retardation
Hus1<tm1Led>/Hus1<tm1Led>	involves: 129S6/SvEvTac	MGI:3590176	hm	increased embryonic tissue cell apoptosis
Id4<tm1Fsky>/Id4<tm1Fsky>	involves: 129P2/OlaHsd	MGI:4819227	hm	abnormal bone mineralization
Id4<tm1Fsky>/Id4<tm1Fsky>	involves: 129P2/OlaHsd	MGI:4819227	hm	abnormal bone ossification
Id4<tm1Fsky>/Id4<tm1Fsky>	involves: 129P2/OlaHsd	MGI:4819227	hm	abnormal bone structure
Id4<tm1Fsky>/Id4<tm1Fsky>	involves: 129P2/OlaHsd	MGI:4819227	hm	abnormal epiphyseal plate morphology
Id4<tm1Fsky>/Id4<tm1Fsky>	involves: 129P2/OlaHsd	MGI:4819227	hm	abnormal fat cell morphology
Id4<tm1Fsky>/Id4<tm1Fsky>	involves: 129P2/OlaHsd	MGI:4819227	hm	abnormal osteoblast morphology
Id4<tm1Fsky>/Id4<tm1Fsky>	involves: 129P2/OlaHsd	MGI:4819227	hm	decreased body length
Id4<tm1Fsky>/Id4<tm1Fsky>	involves: 129P2/OlaHsd	MGI:4819227	hm	decreased body weight
Id4<tm1Fsky>/Id4<tm1Fsky>	involves: 129P2/OlaHsd	MGI:4819227	hm	Osteoporosis
Id4<tm1Fsky>/Id4<tm1Fsky>	involves: 129P2/OlaHsd	MGI:4819227	hm	postnatal growth retardation
Id4<tm1Fsky>/Id4<tm1Fsky>	involves: 129P2/OlaHsd	MGI:4819227	hm	premature death
Id4<tm1Fsky>/Id4<tm1Fsky>	involves: 129P2/OlaHsd	MGI:4819227	hm	skeleton phenotype
Id4<tm1Fsky>/Id4<tm1Fsky>	involves: 129P2/OlaHsd * CD-1	MGI:3580443	hm	abnormal astrocyte morphology
Id4<tm1Fsky>/Id4<tm1Fsky>	involves: 129P2/OlaHsd * CD-1	MGI:3580443	hm	abnormal basal ganglion morphology
Id4<tm1Fsky>/Id4<tm1Fsky>	involves: 129P2/OlaHsd * CD-1	MGI:3580443	hm	abnormal brain development
Id4<tm1Fsky>/Id4<tm1Fsky>	involves: 129P2/OlaHsd * CD-1	MGI:3580443	hm	abnormal forebrain development
Id4<tm1Fsky>/Id4<tm1Fsky>	involves: 129P2/OlaHsd * CD-1	MGI:3580443	hm	abnormal hippocampus development
Id4<tm1Fsky>/Id4<tm1Fsky>	involves: 129P2/OlaHsd * CD-1	MGI:3580443	hm	abnormal lateral ganglionic eminence morphology
Id4<tm1Fsky>/Id4<tm1Fsky>	involves: 129P2/OlaHsd * CD-1	MGI:3580443	hm	abnormal lateral ventricle morphology
Id4<tm1Fsky>/Id4<tm1Fsky>	involves: 129P2/OlaHsd * CD-1	MGI:3580443	hm	abnormal medial ganglionic eminence morphology
Id4<tm1Fsky>/Id4<tm1Fsky>	involves: 129P2/OlaHsd * CD-1	MGI:3580443	hm	abnormal neocortex morphology
Id4<tm1Fsky>/Id4<tm1Fsky>	involves: 129P2/OlaHsd * CD-1	MGI:3580443	hm	abnormal neuron differentiation
Id4<tm1Fsky>/Id4<tm1Fsky>	involves: 129P2/OlaHsd * CD-1	MGI:3580443	hm	abnormal stratification in cerebral cortex
Id4<tm1Fsky>/Id4<tm1Fsky>	involves: 129P2/OlaHsd * CD-1	MGI:3580443	hm	decreased brain size
Id4<tm1Fsky>/Id4<tm1Fsky>	involves: 129P2/OlaHsd * CD-1	MGI:3580443	hm	partial postnatal lethality
Id4<tm1Fsky>/Id4<tm1Fsky>	involves: 129P2/OlaHsd * CD-1	MGI:3580443	hm	premature death
Id4<tm1Fsky>/Id4<tm1Fsky>	involves: 129P2/OlaHsd * CD-1	MGI:3580443	hm	premature neuronal precursor differentiation
Id4<tm1Fsky>/Id4<tm1Fsky>	involves: 129P2/OlaHsd * CD-1	MGI:3580443	hm	weight loss
Id4<tm1Mais>/Id4<tm1Mais>	involves: 129X1/SvJ	MGI:3505781	hm	abnormal hippocampus development
Id4<tm1Mais>/Id4<tm1Mais>	involves: 129X1/SvJ	MGI:3505781	hm	abnormal lateral ventricle morphology
Id4<tm1Mais>/Id4<tm1Mais>	involves: 129X1/SvJ	MGI:3505781	hm	abnormal neocortex morphology
Id4<tm1Mais>/Id4<tm1Mais>	involves: 129X1/SvJ	MGI:3505781	hm	abnormal neuron differentiation
Id4<tm1Mais>/Id4<tm1Mais>	involves: 129X1/SvJ	MGI:3505781	hm	abnormal telencephalon morphology
Id4<tm1Mais>/Id4<tm1Mais>	involves: 129X1/SvJ	MGI:3505781	hm	decreased brain size
Id4<tm1Mais>/Id4<tm1Mais>	involves: 129X1/SvJ	MGI:3505781	hm	telencephalon hypoplasia
Id4<tm1Mais>/Id4<tm1Mais>	involves: 129X1/SvJ * C57BL/6	MGI:3838365	hm	hypoactivity
Lgi4<tm1Sjm>/Lgi4<tm1Sjm>	involves: C57BL/6 * SJL	MGI:4849630	hm	abnormal forelimb morphology
Lgi4<tm1Sjm>/Lgi4<tm1Sjm>	involves: C57BL/6 * SJL	MGI:4849630	hm	abnormal glial cell morphology
Lgi4<tm1Sjm>/Lgi4<tm1Sjm>	involves: C57BL/6 * SJL	MGI:4849630	hm	abnormal glial cell physiology
Lgi4<tm1Sjm>/Lgi4<tm1Sjm>	involves: C57BL/6 * SJL	MGI:4849630	hm	abnormal PNS glial cell morphology
Lgi4<tm1Sjm>/Lgi4<tm1Sjm>	involves: C57BL/6 * SJL	MGI:4849630	hm	abnormal Schwann cell morphology
Lgi4<tm1Sjm>/Lgi4<tm1Sjm>	involves: C57BL/6 * SJL	MGI:4849630	hm	abnormal sciatic nerve morphology
Lgi4<tm1Sjm>/Lgi4<tm1Sjm>	involves: C57BL/6 * SJL	MGI:4849630	hm	decreased body size
Lgi4<tm1Sjm>/Lgi4<tm1Sjm>	involves: C57BL/6 * SJL	MGI:4849630	hm	decreased body weight
Lgi4<tm1Sjm>/Lgi4<tm1Sjm>	involves: C57BL/6 * SJL	MGI:4849630	hm	demyelination
Lgi4<tm1Sjm>/Lgi4<tm1Sjm>	involves: C57BL/6 * SJL	MGI:4849630	hm	partial neonatal lethality
Lgi4<tm1Sjm>/Lgi4<tm1Sjm>	involves: C57BL/6 * SJL	MGI:4849630	hm	postnatal growth retardation
Lpar4<tm1Sati>/Lpar4<tm1Sati>	involves: C57BL/6	MGI:4868233	hm	abnormal blood vessel morphology
Lpar4<tm1Sati>/Lpar4<tm1Sati>	involves: C57BL/6	MGI:4868233	hm	abnormal embryogenesis/ development
Lpar4<tm1Sati>/Lpar4<tm1Sati>	involves: C57BL/6	MGI:4868233	hm	abnormal fluid regulation
Lpar4<tm1Sati>/Lpar4<tm1Sati>	involves: C57BL/6	MGI:4868233	hm	abnormal pericyte morphology
Lpar4<tm1Sati>/Lpar4<tm1Sati>	involves: C57BL/6	MGI:4868233	hm	absent mandible
Lpar4<tm1Sati>/Lpar4<tm1Sati>	involves: C57BL/6	MGI:4868233	hm	decreased embryo size
Lpar4<tm1Sati>/Lpar4<tm1Sati>	involves: C57BL/6	MGI:4868233	hm	decreased fetal size
Lpar4<tm1Sati>/Lpar4<tm1Sati>	involves: C57BL/6	MGI:4868233	hm	hemopericardium
Lpar4<tm1Sati>/Lpar4<tm1Sati>	involves: C57BL/6	MGI:4868233	hm	hemorrhage
Lpar4<tm1Sati>/Lpar4<tm1Sati>	involves: C57BL/6	MGI:4868233	hm	internal hemorrhage
Lpar4<tm1Sati>/Lpar4<tm1Sati>	involves: C57BL/6	MGI:4868233	hm	lung hemorrhage
Lpar4<tm1Sati>/Lpar4<tm1Sati>	involves: C57BL/6	MGI:4868233	hm	lymphangiectasis
Lpar4<tm1Sati>/Lpar4<tm1Sati>	involves: C57BL/6	MGI:4868233	hm	omphalocele
Lpar4<tm1Sati>/Lpar4<tm1Sati>	involves: C57BL/6	MGI:4868233	hm	partial prenatal lethality
Lpar4<tm1Sati>/Lpar4<tm1Sati>	involves: C57BL/6	MGI:4868233	hm	partial preweaning lethality
Lpar4<tm1Sati>/Lpar4<tm1Sati>	involves: C57BL/6	MGI:4868233	hm	pericardial effusion
Lpar4<tm1Sati>/Lpar4<tm1Sati>	involves: C57BL/6	MGI:4868233	hm	skin edema
Lpar4<tm1Sati>/Lpar4<tm1Sati>	involves: C57BL/6	MGI:4868233	hm	vascular smooth muscle cell hypoplasia
Lrp4<tm1Her>/Lrp4<tm1Her>	involves: 129S6/SvEvTac	MGI:4455051	hm	abnormal enamel morphology
Lrp4<tm1Her>/Lrp4<tm1Her>	involves: 129S6/SvEvTac	MGI:4455051	hm	abnormal incisor morphology
Lrp4<tm1Her>/Lrp4<tm1Her>	involves: 129S6/SvEvTac	MGI:4455051	hm	supernumerary incisors
Lrp4<tm1Her>/Lrp4<tm1Her>	involves: 129S6/SvEvTac * C57BL/6	MGI:3622272	hm	abnormal chondrocyte morphology
Lrp4<tm1Her>/Lrp4<tm1Her>	involves: 129S6/SvEvTac * C57BL/6	MGI:3622272	hm	abnormal digit morphology
Lrp4<tm1Her>/Lrp4<tm1Her>	involves: 129S6/SvEvTac * C57BL/6	MGI:3622272	hm	abnormal forelimb morphology
Lrp4<tm1Her>/Lrp4<tm1Her>	involves: 129S6/SvEvTac * C57BL/6	MGI:3622272	hm	abnormal hindlimb morphology
Lrp4<tm1Her>/Lrp4<tm1Her>	involves: 129S6/SvEvTac * C57BL/6	MGI:3622272	hm	abnormal incisor morphology
Lrp4<tm1Her>/Lrp4<tm1Her>	involves: 129S6/SvEvTac * C57BL/6	MGI:3622272	hm	abnormal postnatal growth
Lrp4<tm1Her>/Lrp4<tm1Her>	involves: 129S6/SvEvTac * C57BL/6	MGI:3622272	hm	partial preweaning lethality
Lrp4<tm1Her>/Lrp4<tm1Her>	involves: 129S6/SvEvTac * C57BL/6	MGI:3622272	hm	polydactyly
Lrp4<tm1Her>/Lrp4<tm1Her>	involves: 129S6/SvEvTac * C57BL/6	MGI:3622272	hm	thick apical ectodermal ridge
Lrp4<tm1Her>/Lrp4<tm1Her>	involves: 129S/SvEvBrd * 129S6/SvEvTac * C57BL/6J	MGI:5561076	hm	abnormal neuromuscular synapse morphology
Lrp4<tm2Her>/Lrp4<tm2Her>	involves: 129S/SvEv	MGI:4455052	hm	abnormal incisor morphology
Lrp4<tm2Her>/Lrp4<tm2Her>	involves: 129S/SvEv	MGI:4455052	hm	abnormal molar crown morphology
Lrp4<tm2Her>/Lrp4<tm2Her>	involves: 129S/SvEv	MGI:4455052	hm	supernumerary incisors
Lrp4<tm2Her>/Lrp4<tm2Her>	involves: 129S/SvEvBrd * C57BL/6J	MGI:5561073	hm	abnormal neuromuscular synapse morphology
Lrp4<tm2Her>/Lrp4<tm2Her>	involves: 129S/SvEvBrd * C57BL/6J	MGI:5561073	hm	complete perinatal lethality
Lrp4<tm2Her>/Lrp4<tm2Her>	involves: 129S/SvEvBrd * C57BL/6J	MGI:5561073	hm	failure of neuromuscular synapse postsynaptic differentiation
Lrp4<tm2Her>/Lrp4<tm2Her>	involves: 129S/SvEvBrd * C57BL/6J	MGI:5561073	hm	failure of neuromuscular synapse presynaptic differentiation
Lrp4<tm2Her>/Lrp4<tm2Her>	involves: 129S/SvEv * C57BL	MGI:5289695	hm	abnormal kidney development
Lrp4<tm2Her>/Lrp4<tm2Her>	involves: 129S/SvEv * C57BL	MGI:5289695	hm	abnormal neuromuscular synapse morphology
Lrp4<tm2Her>/Lrp4<tm2Her>	involves: 129S/SvEv * C57BL	MGI:5289695	hm	abnormal ureteric bud invasion
Lrp4<tm2Her>/Lrp4<tm2Her>	involves: 129S/SvEv * C57BL	MGI:5289695	hm	abnormal ureteric bud morphology
Lrp4<tm2Her>/Lrp4<tm2Her>	involves: 129S/SvEv * C57BL	MGI:5289695	hm	absent kidney
Lrp4<tm2Her>/Lrp4<tm2Her>	involves: 129S/SvEv * C57BL	MGI:5289695	hm	absent metanephric mesenchyme
Lrp4<tm2Her>/Lrp4<tm2Her>	involves: 129S/SvEv * C57BL	MGI:5289695	hm	Cenani-Lenz Syndactyly Syndrome
Lrp4<tm2Her>/Lrp4<tm2Her>	involves: 129S/SvEv * C57BL	MGI:5289695	hm	complete neonatal lethality
Lrp4<tm2Her>/Lrp4<tm2Her>	involves: 129S/SvEv * C57BL	MGI:5289695	hm	impaired branching involved in ureteric bud morphogenesis
Lrp4<tm2Her>/Lrp4<tm2Her>	involves: 129S/SvEv * C57BL	MGI:5289695	hm	single kidney
Lrp4<tm2Her>/Lrp4<tm2Her>	involves: 129S/SvEv * C57BL	MGI:5289695	hm	ureter hypoplasia
Megf10<tm1a(KOMP)Jrs>/Megf10<tm1a(KOMP)Jrs>	involves: 129S4/SvJae * C57BL/6	MGI:5320416	hm	abnormal amacrine cell morphology
Megf10<tm1a(KOMP)Jrs>/Megf10<tm1a(KOMP)Jrs>	involves: 129S4/SvJae * C57BL/6	MGI:5320416	hm	abnormal horizontal cell morphology
Mertk<tm1Gkm>/Mertk<tm1Gkm>	B6.129P2-Mertk<tm1Gkm>	MGI:3844821	hm	decreased autoantibody level
Mertk<tm1Gkm>/Mertk<tm1Gkm>	B6.129P2-Mertk<tm1Gkm>	MGI:3844821	hm	decreased susceptibility to graft versus host disease
Mertk<tm1Gkm>/Mertk<tm1Gkm>	involves: 129P2/OlaHsd	MGI:3844732	hm	abnormal cone electrophysiology
Mertk<tm1Gkm>/Mertk<tm1Gkm>	involves: 129P2/OlaHsd	MGI:3844732	hm	abnormal photoreceptor outer segment morphology
Mertk<tm1Gkm>/Mertk<tm1Gkm>	involves: 129P2/OlaHsd	MGI:3844732	hm	abnormal retinal outer nuclear layer morphology
Mertk<tm1Gkm>/Mertk<tm1Gkm>	involves: 129P2/OlaHsd	MGI:3844732	hm	abnormal retinal pigment epithelium morphology
Mertk<tm1Gkm>/Mertk<tm1Gkm>	involves: 129P2/OlaHsd	MGI:3844732	hm	abnormal retinal vasculature morphology
Mertk<tm1Gkm>/Mertk<tm1Gkm>	involves: 129P2/OlaHsd	MGI:3844732	hm	abnormal retina morphology
Mertk<tm1Gkm>/Mertk<tm1Gkm>	involves: 129P2/OlaHsd	MGI:3844732	hm	abnormal rod electrophysiology
Mertk<tm1Gkm>/Mertk<tm1Gkm>	involves: 129P2/OlaHsd	MGI:3844732	hm	disorganized photoreceptor outer segment
Mertk<tm1Gkm>/Mertk<tm1Gkm>	involves: 129P2/OlaHsd	MGI:3844732	hm	photoreceptor outer segment degeneration
Mertk<tm1Gkm>/Mertk<tm1Gkm>	involves: 129P2/OlaHsd	MGI:3844732	hm	retinal degeneration
Mertk<tm1Gkm>/Mertk<tm1Gkm>	involves: 129P2/OlaHsd	MGI:3844732	hm	retinal pigment epithelium atrophy
Mertk<tm1Gkm>/Mertk<tm1Gkm>	involves: 129P2/OlaHsd	MGI:3844732	hm	retinal rod cell degeneration
Mertk<tm1Gkm>/Mertk<tm1Gkm>	involves: 129P2/OlaHsd	MGI:3844732	hm	thin retinal outer nuclear layer
Mertk<tm1Gkm>/Mertk<tm1Gkm>	involves: 129P2/OlaHsd * C57BL/6 * DBA/2	MGI:3844702	hm	abnormal small intestine morphology
Mertk<tm1Gkm>/Mertk<tm1Gkm>	involves: 129P2/OlaHsd * C57BL/6 * DBA/2	MGI:3844702	hm	increased circulating tumor necrosis factor level
Mertk<tm1Gkm>/Mertk<tm1Gkm>	involves: 129P2/OlaHsd * C57BL/6 * DBA/2	MGI:3844702	hm	increased sensitivity to induced morbidity/mortality
Mertk<tm1Gkm>/Mertk<tm1Gkm>	involves: 129P2/OlaHsd * C57BL/6 * DBA/2	MGI:3844702	hm	increased susceptibility to endotoxin shock
Mertk<tm1Gkm>/Mertk<tm1Gkm>	involves: 129P2/OlaHsd * C57BL/6 * DBA/2	MGI:3844702	hm	increased tumor necrosis factor secretion
Mertk<tm1Gkm>/Mertk<tm1Gkm>	NOD.129P2-Mertk<tm1Gkm>	MGI:3844819	hm	abnormal mononuclear cell morphology
Mertk<tm1Gkm>/Mertk<tm1Gkm>	NOD.129P2-Mertk<tm1Gkm>	MGI:3844819	hm	decreased susceptibility to autoimmune diabetes
Mertk<tm1Gkm>/Mertk<tm1Gkm>	NOD.129P2-Mertk<tm1Gkm>	MGI:3844819	hm	decreased T cell number
Mertk<tm1Gkm>/Mertk<tm1Gkm>	NOD.129P2-Mertk<tm1Gkm>	MGI:3844819	hm	increased T cell apoptosis
Mertk<tm1Gkm>/Mertk<tm1Gkm>	NOD.129P2-Mertk<tm1Gkm>	MGI:3844819	hm	insulitis
Mertk<tm1Grl>/Mertk<tm1Grl>	involves: 129P2/OlaHsd	MGI:2654780	hm	abnormal photoreceptor outer segment morphology
Mertk<tm1Grl>/Mertk<tm1Grl>	involves: 129P2/OlaHsd	MGI:2654780	hm	abnormal retinal pigment epithelium morphology
Mertk<tm1Grl>/Mertk<tm1Grl>	involves: 129P2/OlaHsd	MGI:2654780	hm	blindness
Mertk<tm1Grl>/Mertk<tm1Grl>	involves: 129P2/OlaHsd	MGI:2654780	hm	cardiovascular system phenotype
Mertk<tm1Grl>/Mertk<tm1Grl>	involves: 129P2/OlaHsd	MGI:2654780	hm	decreased Sertoli cell phagocytosis
Mertk<tm1Grl>/Mertk<tm1Grl>	involves: 129P2/OlaHsd	MGI:2654780	hm	disorganized photoreceptor outer segment
Mertk<tm1Grl>/Mertk<tm1Grl>	involves: 129P2/OlaHsd	MGI:2654780	hm	enlarged spleen
Mertk<tm1Grl>/Mertk<tm1Grl>	involves: 129P2/OlaHsd	MGI:2654780	hm	retinal photoreceptor degeneration
Mertk<tm1Grl>/Mertk<tm1Grl>	involves: 129P2/OlaHsd	MGI:2654780	hm	vagina atresia
Mertk<tm1Lex>/Mertk<tm1Lex>	involves: 129S5/SvEvBrd * C57BL/6	MGI:3609493	hm	abnormal blood coagulation
Mertk<tm1Lex>/Mertk<tm1Lex>	involves: 129S5/SvEvBrd * C57BL/6	MGI:3609493	hm	decreased platelet aggregation
Mlc1<tm1.2Nune>/Mlc1<tm1.2Nune>	involves: 129 * C57BL/6	MGI:5646501	hm	abnormal glial cell physiology
Mlc1<tm1.2Nune>/Mlc1<tm1.2Nune>	involves: 129 * C57BL/6	MGI:5646501	hm	abnormal myelin sheath morphology
Mlc1<tm1.2Nune>/Mlc1<tm1.2Nune>	involves: 129 * C57BL/6	MGI:5646501	hm	abnormal oligodendrocyte physiology
Mlc1<tm1.2Nune>/Mlc1<tm1.2Nune>	involves: 129 * C57BL/6	MGI:5646501	hm	brain vacuoles
Nat1/Nat2<tm1Kss>/Nat1/Nat2<tm1Kss>	involves: 129S1/Sv * 129X1/SvJ * C57BL/6 * CD-1	MGI:3614418	hm	abnormal xenobiotic pharmacokinetics
Ncam1<tm1.1Mag>/Ncam1<tm1.1Mag>	involves: 129S2/SvPas * C3H * CF-1	MGI:3574806	hm	behavior/neurological phenotype
Ncam1<tm1Cgn>/Ncam1<tm1Cgn>	B6.129P2-Ncam1<tm1Cgn>	MGI:3762776	hm	abnormal CNS glial cell morphology
Ncam1<tm1Cgn>/Ncam1<tm1Cgn>	B6.129P2-Ncam1<tm1Cgn>	MGI:3762776	hm	abnormal neuron differentiation
Ncam1<tm1Cgn>/Ncam1<tm1Cgn>	involves: 129P2/OlaHsd	MGI:2182567	hm	abnormal spatial learning
Ncam1<tm1Cgn>/Ncam1<tm1Cgn>	involves: 129P2/OlaHsd	MGI:2182567	hm	decreased brain size
Ncam1<tm1Cgn>/Ncam1<tm1Cgn>	involves: 129P2/OlaHsd	MGI:2182567	hm	small olfactory bulb
Ncam1<tm1Cgn>/Ncam1<tm1Cgn>	involves: C57BL/6J	MGI:3574807	hm	abnormal circadian period
Ncam1<tm1Cgn>/Ncam1<tm1Cgn>	involves: C57BL/6J	MGI:3574807	hm	abnormal circadian phase
Ncam1<tm1Cgn>/Ncam1<tm1Cgn>	involves: C57BL/6J	MGI:3574807	hm	shortened circadian period
Ncam1<tm1Cgn>/Ncam1<tm1Cgn>	Not Specified	MGI:5450603	hm	decreased body weight
Ncam1<tm1Klc>/Ncam1<tm1Klc>	either: (involves: 129 * C57BL/6J) or (involves: 129 * CD-1)	MGI:3687197	hm	abnormal hippocampus CA3 region morphology
Ncam1<tm1Klc>/Ncam1<tm1Klc>	either: (involves: 129 * C57BL/6J) or (involves: 129 * CD-1)	MGI:3687197	hm	abnormal postnatal subventricular zone morphology
Ncam1<tm1Klc>/Ncam1<tm1Klc>	either: (involves: 129 * C57BL/6J) or (involves: 129 * CD-1)	MGI:3687197	hm	small olfactory bulb
Ncam1<tm1Mag>/Ncam1<tm1Mag>	involves: 129S2/SvPas * CF1	MGI:2182569	hm	abnormal cerebellum morphology
Ncam1<tm1Mag>/Ncam1<tm1Mag>	involves: 129S2/SvPas * CF1	MGI:2182569	hm	abnormal hippocampus pyramidal cell layer
Ncam1<tm1Mag>/Ncam1<tm1Mag>	involves: 129S2/SvPas * CF1	MGI:2182569	hm	abnormal olfactory bulb morphology
Ncam1<tm1Mag>/Ncam1<tm1Mag>	involves: 129S2/SvPas * CF1	MGI:2182569	hm	abnormal retina morphology
Ncam1<tm1Mag>/Ncam1<tm1Mag>	involves: 129S2/SvPas * CF1	MGI:2182569	hm	shortened circadian period
Ncam1<tm1Mag>/Ncam1<tm1Mag>	involves: 129S2/SvPas * CF1	MGI:2182569	hm	small olfactory bulb
Ncan<tm1Ref>/Ncan<tm1Ref>	involves: 129S1/Sv * 129X1/SvJ * C57BL/6	MGI:3034065	hm	abnormal long term potentiation
Ncan<tm2Ref>/Ncan<tm2Ref>	involves: 129S1/Sv * 129X1/SvJ * C57BL/6	MGI:3034066	hm	abnormal long term potentiation
Ncan<tm3Ref>/Ncan<tm3Ref>	involves: 129S1/Sv * 129X1/SvJ * C57BL/6	MGI:3034067	hm	abnormal long term potentiation
Ndp<tm1Lex>/Ndp<tm1Lex>	involves: 129S5/SvEvBrd	MGI:4414648	hm	abnormal retinal vasculature morphology
Ndp<tm1Lex>/Ndp<tm1Lex>	involves: 129S5/SvEvBrd	MGI:4414648	hm	increased vascular permeability
Ndp<tm1Lex>/Ndp<tm1Lex>	involves: 129S5/SvEvBrd	MGI:4414648	hm	vasculature congestion
Ndp<tm1Wbrg>/Ndp<tm1Wbrg>	involves: 129P2/OlaHsd * C57BL/6	MGI:4361744	hm	reproductive system phenotype
Npas3<tm1Ewb>/Npas3<tm1Ewb>	involves: 129S1/Sv * 129X1/SvJ * C57BL/6	MGI:3606246	hm	abnormal behavioral response to xenobiotic
Npas3<tm1Ewb>/Npas3<tm1Ewb>	involves: 129S1/Sv * 129X1/SvJ * C57BL/6	MGI:3606246	hm	abnormal cerebellar foliation
Npas3<tm1Ewb>/Npas3<tm1Ewb>	involves: 129S1/Sv * 129X1/SvJ * C57BL/6	MGI:3606246	hm	abnormal cerebral aqueduct morphology
Npas3<tm1Ewb>/Npas3<tm1Ewb>	involves: 129S1/Sv * 129X1/SvJ * C57BL/6	MGI:3606246	hm	abnormal cingulate gyrus morphology
Npas3<tm1Ewb>/Npas3<tm1Ewb>	involves: 129S1/Sv * 129X1/SvJ * C57BL/6	MGI:3606246	hm	abnormal corpus callosum morphology
Npas3<tm1Ewb>/Npas3<tm1Ewb>	involves: 129S1/Sv * 129X1/SvJ * C57BL/6	MGI:3606246	hm	abnormal gait
Npas3<tm1Ewb>/Npas3<tm1Ewb>	involves: 129S1/Sv * 129X1/SvJ * C57BL/6	MGI:3606246	hm	abnormal hippocampus morphology
Npas3<tm1Ewb>/Npas3<tm1Ewb>	involves: 129S1/Sv * 129X1/SvJ * C57BL/6	MGI:3606246	hm	abnormal nest building behavior
Npas3<tm1Ewb>/Npas3<tm1Ewb>	involves: 129S1/Sv * 129X1/SvJ * C57BL/6	MGI:3606246	hm	abnormal reflex
Npas3<tm1Ewb>/Npas3<tm1Ewb>	involves: 129S1/Sv * 129X1/SvJ * C57BL/6	MGI:3606246	hm	abnormal response to novel object
Npas3<tm1Ewb>/Npas3<tm1Ewb>	involves: 129S1/Sv * 129X1/SvJ * C57BL/6	MGI:3606246	hm	abnormal response to novelty
Npas3<tm1Ewb>/Npas3<tm1Ewb>	involves: 129S1/Sv * 129X1/SvJ * C57BL/6	MGI:3606246	hm	abnormal retrosplenial region morphology
Npas3<tm1Ewb>/Npas3<tm1Ewb>	involves: 129S1/Sv * 129X1/SvJ * C57BL/6	MGI:3606246	hm	abnormal startle reflex
Npas3<tm1Ewb>/Npas3<tm1Ewb>	involves: 129S1/Sv * 129X1/SvJ * C57BL/6	MGI:3606246	hm	decreased anxiety-related response
Npas3<tm1Ewb>/Npas3<tm1Ewb>	involves: 129S1/Sv * 129X1/SvJ * C57BL/6	MGI:3606246	hm	decreased body weight
Npas3<tm1Ewb>/Npas3<tm1Ewb>	involves: 129S1/Sv * 129X1/SvJ * C57BL/6	MGI:3606246	hm	enlarged fourth ventricle
Npas3<tm1Ewb>/Npas3<tm1Ewb>	involves: 129S1/Sv * 129X1/SvJ * C57BL/6	MGI:3606246	hm	enlarged lateral ventricles
Npas3<tm1Ewb>/Npas3<tm1Ewb>	involves: 129S1/Sv * 129X1/SvJ * C57BL/6	MGI:3606246	hm	enlarged third ventricle
Npas3<tm1Ewb>/Npas3<tm1Ewb>	involves: 129S1/Sv * 129X1/SvJ * C57BL/6	MGI:3606246	hm	impaired coordination
Npas3<tm1Ewb>/Npas3<tm1Ewb>	involves: 129S1/Sv * 129X1/SvJ * C57BL/6	MGI:3606246	hm	increased exploration in new environment
Npas3<tm1Ewb>/Npas3<tm1Ewb>	involves: 129S1/Sv * 129X1/SvJ * C57BL/6	MGI:3606246	hm	limb grasping
Npas3<tm1Ewb>/Npas3<tm1Ewb>	involves: 129S1/Sv * 129X1/SvJ * C57BL/6	MGI:3606246	hm	short stride length
Npas3<tm1Mesu>/Npas3<tm1Mesu>	B6.129S6-Npas3<tm1Mesu>	MGI:3852378	hm	abnormal pulmonary alveolar parenchyma morphology
Npas3<tm1Mesu>/Npas3<tm1Mesu>	B6.129S6-Npas3<tm1Mesu>	MGI:3852378	hm	bronchiectasis
Npas3<tm1Mesu>/Npas3<tm1Mesu>	B6.129S6-Npas3<tm1Mesu>	MGI:3852378	hm	cyanosis
Npas3<tm1Mesu>/Npas3<tm1Mesu>	B6.129S6-Npas3<tm1Mesu>	MGI:3852378	hm	dilated respiratory conducting tubes
Npas3<tm1Mesu>/Npas3<tm1Mesu>	B6.129S6-Npas3<tm1Mesu>	MGI:3852378	hm	impaired branching involved in trachea morphogenesis
Npas3<tm1Mesu>/Npas3<tm1Mesu>	B6.129S6-Npas3<tm1Mesu>	MGI:3852378	hm	overexpanded pulmonary alveoli
Npas3<tm1Mesu>/Npas3<tm1Mesu>	B6.129S6-Npas3<tm1Mesu>	MGI:3852378	hm	partial postnatal lethality
Npas3<tm1Mesu>/Npas3<tm1Mesu>	B6.129S6-Npas3<tm1Mesu>	MGI:3852378	hm	respiratory distress
Npas3<tm1Slm>/Npas3<tm1Slm>	involves: 129S/SvEv * C57BL/6	MGI:3054794	hm	abnormal maternal nurturing
Npas3<tm1Slm>/Npas3<tm1Slm>	involves: 129S/SvEv * C57BL/6	MGI:3054794	hm	abnormal social investigation
Npas3<tm1Slm>/Npas3<tm1Slm>	involves: 129S/SvEv * C57BL/6	MGI:3054794	hm	decreased body size
Npas3<tm1Slm>/Npas3<tm1Slm>	involves: 129S/SvEv * C57BL/6	MGI:3054794	hm	hyperactivity
Npas3<tm1Slm>/Npas3<tm1Slm>	involves: 129S/SvEv * C57BL/6	MGI:3054794	hm	short stride length
Npas3<tm1Slm>/Npas3<tm1Slm>	involves: 129S/SvEv * C57BL/6	MGI:3054794	hm	stereotypic behavior
Ntsr2<tm1Dafe>/Ntsr2<tm1Dafe>	B6.129P2-Ntsr2<tm1Dafe>	MGI:4459070	hm	abnormal gait
Ntsr2<tm1Dafe>/Ntsr2<tm1Dafe>	B6.129P2-Ntsr2<tm1Dafe>	MGI:4459070	hm	decreased startle reflex
Ntsr2<tm1Dafe>/Ntsr2<tm1Dafe>	B6.129P2-Ntsr2<tm1Dafe>	MGI:4459070	hm	increased prepulse inhibition
Ntsr2<tm1Hmno>/Ntsr2<tm1Hmno>	involves: 129P2/OlaHsd * C57BL/6J	MGI:3029221	hm	increased thermal nociceptive threshold
Ntsr2<tm1Mfsc>/Ntsr2<tm1Mfsc>	involves: 129P2/OlaHsd * C57BL/6	MGI:3044964	hm	nervous system phenotype
Pantr1<tm1Vlcg>/Pantr1<tm1Vlcg>	involves: 129S6/SvEvTac * C57BL/6J * C57BL/6N	MGI:5563553	hm	no abnormal phenotype detected
Phlpp1<tm1.1Saco>/Phlpp1<tm1.1Saco>	involves: 129/Sv * 129S4/SvJae	MGI:4421809	hm	abnormal circadian phase
Phlpp1<tm1.1Saco>/Phlpp1<tm1.1Saco>	involves: 129/Sv * 129S4/SvJae	MGI:4421809	hm	behavior/neurological phenotype
Phlpp1<tm1.1Saco>/Phlpp1<tm1.1Saco>	involves: 129/Sv * 129S4/SvJae	MGI:4421809	hm	delayed circadian phase
Plxnb1<tm1.1Ltam>/Plxnb1<tm1.1Ltam>	involves: 129/Sv * C57BL/6	MGI:3805512	hm	no abnormal phenotype detected
Plxnb1<tm1Mom>/Plxnb1<tm1Mom>	involves: 129P2/OlaHsd	MGI:5007631	hm	vision/eye phenotype
Plxnb1<tm1Rkun>/Plxnb1<tm1Rkun>	involves: FVB/N	MGI:3713709	hm	nervous system phenotype
Plxnb1<tm1Rkun>/Plxnb1<tm1Rkun>	Not Specified	MGI:3808769	hm	abnormal branching involved in ureteric bud morphogenesis
Plxnb1<tm1Rkun>/Plxnb1<tm1Rkun>	Not Specified	MGI:3808769	hm	abnormal metanephros morphology
Plxnb1<tm1Rkun>/Plxnb1<tm1Rkun>	Not Specified	MGI:3808769	hm	enlarged kidney
Pou3f3<tm1Rmc>/Pou3f3<tm1Rmc>	Not Specified	MGI:2660728	hm	abnormal cerebral cortex morphology
Pou3f3<tm1Rmc>/Pou3f3<tm1Rmc>	Not Specified	MGI:2660728	hm	abnormal hippocampus morphology
Pou3f3<tm1Rmc>/Pou3f3<tm1Rmc>	Not Specified	MGI:2660728	hm	abnormal incus morphology
Pou3f3<tm1Rmc>/Pou3f3<tm1Rmc>	Not Specified	MGI:2660728	hm	abnormal jaw morphology
Pou3f3<tm1Rmc>/Pou3f3<tm1Rmc>	Not Specified	MGI:2660728	hm	abnormal loop of Henle morphology
Pou3f3<tm1Rmc>/Pou3f3<tm1Rmc>	Not Specified	MGI:2660728	hm	abnormal stapes morphology
Pou3f3<tm1Rmc>/Pou3f3<tm1Rmc>	Not Specified	MGI:2660728	hm	abnormal styloid process morphology
Pou3f3<tm1Rmc>/Pou3f3<tm1Rmc>	Not Specified	MGI:2660728	hm	absent squamosal bone
Pou3f3<tm1Rmc>/Pou3f3<tm1Rmc>	Not Specified	MGI:2660728	hm	absent zygomatic bone
Pou3f3<tm1Rmc>/Pou3f3<tm1Rmc>	Not Specified	MGI:2660728	hm	complete neonatal lethality
Pou3f3<tm1Tno>/Pou3f3<tm1Tno>	involves: 129S4/SvJae * C57BL/6J	MGI:2673388	hm	abnormal distal convoluted tubule morphology
Pou3f3<tm1Tno>/Pou3f3<tm1Tno>	involves: 129S4/SvJae * C57BL/6J	MGI:2673388	hm	abnormal renal tubule morphology
Pou3f3<tm1Tno>/Pou3f3<tm1Tno>	involves: 129S4/SvJae * C57BL/6J	MGI:2673388	hm	complete neonatal lethality
Pou3f3<tm1Tno>/Pou3f3<tm1Tno>	involves: 129S4/SvJae * C57BL/6J	MGI:2673388	hm	decreased kidney cell proliferation
Pou3f3<tm1Tno>/Pou3f3<tm1Tno>	involves: 129S4/SvJae * C57BL/6J	MGI:2673388	hm	decreased kidney weight
Pou3f3<tm1Tno>/Pou3f3<tm1Tno>	involves: 129S4/SvJae * C57BL/6J	MGI:2673388	hm	delayed kidney development
Pou3f3<tm1Tno>/Pou3f3<tm1Tno>	involves: 129S4/SvJae * C57BL/6J	MGI:2673388	hm	increased blood urea nitrogen level
Pou3f3<tm1Tno>/Pou3f3<tm1Tno>	involves: 129S4/SvJae * C57BL/6J	MGI:2673388	hm	increased circulating potassium level
Pou3f3<tm1Tno>/Pou3f3<tm1Tno>	involves: 129S4/SvJae * C57BL/6J	MGI:2673388	hm	increased kidney apoptosis
Pou3f3<tm1Tno>/Pou3f3<tm1Tno>	involves: 129S4/SvJae * C57BL/6J	MGI:2673388	hm	kidney failure
Pou3f3<tm1Tno>/Pou3f3<tm1Tno>	involves: 129S4/SvJae * C57BL/6J	MGI:2673388	hm	oliguria
Pou3f3<tm1Tno>/Pou3f3<tm1Tno>	involves: 129S4/SvJae * C57BL/6J	MGI:2673388	hm	truncated loop of Henle
Prex2<Gt(AH0440)Wtsi>/Prex2<Gt(AH0440)Wtsi>	B6.129P2-Prex2<Gt(AH0440)Wtsi>	MGI:5574339	hm	impaired glucose tolerance
Prex2<Gt(AH0440)Wtsi>/Prex2<Gt(AH0440)Wtsi>	B6.129P2-Prex2<Gt(AH0440)Wtsi>	MGI:5574339	hm	increased circulating glucose level
Prex2<Gt(AH0440)Wtsi>/Prex2<Gt(AH0440)Wtsi>	B6.129P2-Prex2<Gt(AH0440)Wtsi>	MGI:5574339	hm	insulin resistance
Prkd1<tm1.1Eno>/Prkd1<tm1.1Eno>	involves: 129S/SvEv * C57BL/6	MGI:3778391	hm	partial embryonic lethality
Ptprz1<tm1Mno>/Ptprz1<tm1Mno>	B6.129-Ptprz1<tm1Mno>	MGI:2678759	hm	abnormal spatial learning
Ptprz1<tm1Mno>/Ptprz1<tm1Mno>	B6.129-Ptprz1<tm1Mno>	MGI:2678759	hm	decreased susceptibility to bacterial infection
Ptprz1<tm1Mno>/Ptprz1<tm1Mno>	B6.129-Ptprz1<tm1Mno>	MGI:2678759	hm	enhanced long term potentiation
Ptprz1<tm1Mno>/Ptprz1<tm1Mno>	involves: 129S1/Sv * 129X1/SvJ	MGI:3625490	hm	abnormal contextual conditioning behavior
Ptprz1<tm1Mno>/Ptprz1<tm1Mno>	involves: 129S1/Sv * 129X1/SvJ * C57BL/6J	MGI:2678758	hm	no abnormal phenotype detected
Ptprz1<tm1Schl>/Ptprz1<tm1Schl>	involves: 129 * Swiss Webster	MGI:3029453	hm	abnormal myelination
Ptprz1<tm1Schl>/Ptprz1<tm1Schl>	involves: 129 * Swiss Webster	MGI:3029453	hm	abnormal oligodendrocyte morphology
Ptprz1<tm1Schl>/Ptprz1<tm1Schl>	involves: 129 * Swiss Webster	MGI:3029453	hm	increased susceptibility to experimental autoimmune encephalomyelitis
Ptprz1<tm1Vlcg>/Ptprz1<tm1Vlcg>	involves: 129S/SvEvBrd * C57BL/6	MGI:3845023	hm	abnormal nociception after inflammation
Ptprz1<tm1Vlcg>/Ptprz1<tm1Vlcg>	involves: 129S/SvEvBrd * C57BL/6	MGI:3845023	hm	abnormal spatial working memory
Ptprz1<tm1Vlcg>/Ptprz1<tm1Vlcg>	involves: 129S/SvEvBrd * C57BL/6	MGI:3845023	hm	behavior/neurological phenotype
Ptprz1<tm1Vlcg>/Ptprz1<tm1Vlcg>	involves: 129S/SvEvBrd * C57BL/6	MGI:3845023	hm	hypoalgesia
Ptprz1<tm1Vlcg>/Ptprz1<tm1Vlcg>	involves: 129S/SvEvBrd * C57BL/6	MGI:3845023	hm	impaired coordination
Ptprz1<tm1Vlcg>/Ptprz1<tm1Vlcg>	involves: 129S/SvEvBrd * C57BL/6	MGI:3845023	hm	increased thermal nociceptive threshold
Ptprz1<tm1Vlcg>/Ptprz1<tm1Vlcg>	involves: 129S/SvEvBrd * C57BL/6	MGI:3845023	hm	nervous system phenotype
Slc15a2<tm1Dan>/Slc15a2<tm1Dan>	involves: 129/Sv * C57BL/6	MGI:2661037	hm	abnormal renal protein reabsorption
Slc15a2<tm1Dan>/Slc15a2<tm1Dan>	involves: 129/Sv * C57BL/6	MGI:2661037	hm	abnormal renal reabsorbtion
Slc15a2<tm1Dan>/Slc15a2<tm1Dan>	involves: 129/Sv * C57BL/6	MGI:2661037	hm	renal/urinary system phenotype
Slc15a2<tm1Dsmi>/Slc15a2<tm1Dsmi>	involves: 129S1/Sv * 129X1/SvJ * C57BL/6	MGI:2451268	hm	abnormal cell physiology
Slc1a2<tm1Kta>/Slc1a2<tm1Kta>	B6.129P2-Slc1a2<tm1Kta>	MGI:4417920	hm	complete postnatal lethality
Slc1a2<tm1Kta>/Slc1a2<tm1Kta>	involves: 129P2/OlaHsd * C57BL/6	MGI:3033260	hm	abnormal hippocampus CA1 region morphology
Slc1a2<tm1Kta>/Slc1a2<tm1Kta>	involves: 129P2/OlaHsd * C57BL/6	MGI:3033260	hm	abnormal telencephalon morphology
Slc1a2<tm1Kta>/Slc1a2<tm1Kta>	involves: 129P2/OlaHsd * C57BL/6	MGI:3033260	hm	cerebral edema
Slc1a2<tm1Kta>/Slc1a2<tm1Kta>	involves: 129P2/OlaHsd * C57BL/6	MGI:3033260	hm	convulsive seizures
Slc1a2<tm1Kta>/Slc1a2<tm1Kta>	involves: 129P2/OlaHsd * C57BL/6	MGI:3033260	hm	hippocampus pyramidal cell degeneration
Slc1a2<tm1Kta>/Slc1a2<tm1Kta>	involves: 129P2/OlaHsd * C57BL/6	MGI:3033260	hm	increased susceptibility to pharmacologically induced seizures
Slc1a2<tm1Kta>/Slc1a2<tm1Kta>	involves: 129P2/OlaHsd * C57BL/6	MGI:3033260	hm	postnatal growth retardation
Slc1a2<tm1Kta>/Slc1a2<tm1Kta>	involves: 129P2/OlaHsd * C57BL/6	MGI:3033260	hm	premature death
Slc1a3<tm1Kta>/Slc1a3<tm1Kta>	B6.129P2-Slc1a3<tm1Kta>	MGI:4417921	hm	abnormal electroretinogram waveform feature
Slc1a3<tm1Kta>/Slc1a3<tm1Kta>	B6.129P2-Slc1a3<tm1Kta>	MGI:4417921	hm	abnormal optic nerve morphology
Slc1a3<tm1Kta>/Slc1a3<tm1Kta>	B6.129P2-Slc1a3<tm1Kta>	MGI:4417921	hm	abnormal retinal ganglion layer morphology
Slc1a3<tm1Kta>/Slc1a3<tm1Kta>	B6.129P2-Slc1a3<tm1Kta>	MGI:4417921	hm	abnormal retinal inner nuclear layer morphology
Slc1a3<tm1Kta>/Slc1a3<tm1Kta>	B6.129P2-Slc1a3<tm1Kta>	MGI:4417921	hm	decreased retinal ganglion cell number
Slc1a3<tm1Kta>/Slc1a3<tm1Kta>	B6.129P2-Slc1a3<tm1Kta>	MGI:4417921	hm	Glaucoma, Normal Tension, Susceptibility to
Slc1a3<tm1Kta>/Slc1a3<tm1Kta>	B6.129P2-Slc1a3<tm1Kta>	MGI:4417921	hm	increased cellular sensitivity to hydrogen peroxide
Slc1a3<tm1Kta>/Slc1a3<tm1Kta>	B6.129P2-Slc1a3<tm1Kta>	MGI:4417921	hm	increased lactate dehydrogenase level
Slc1a3<tm1Kta>/Slc1a3<tm1Kta>	B6.129P2-Slc1a3<tm1Kta>	MGI:4417921	hm	optic nerve cupping
Slc1a3<tm1Kta>/Slc1a3<tm1Kta>	B6.129P2-Slc1a3<tm1Kta>	MGI:4417921	hm	optic nerve degeneration
Slc1a3<tm1Kta>/Slc1a3<tm1Kta>	B6.129P2-Slc1a3<tm1Kta>	MGI:4417921	hm	retinal degeneration
Slc1a3<tm1Kta>/Slc1a3<tm1Kta>	B6.129P2-Slc1a3<tm1Kta>	MGI:4417921	hm	vision/eye phenotype
Slc1a3<tm1Kta>/Slc1a3<tm1Kta>	involves: 129P2/OlaHsd	MGI:3033217	hm	abnormal auditory brainstem response waveform shape
Slc1a3<tm1Kta>/Slc1a3<tm1Kta>	involves: 129P2/OlaHsd	MGI:3033217	hm	abnormal kindling response
Slc1a3<tm1Kta>/Slc1a3<tm1Kta>	involves: 129P2/OlaHsd	MGI:3033217	hm	abnormal motor coordination/ balance
Slc1a3<tm1Kta>/Slc1a3<tm1Kta>	involves: 129P2/OlaHsd	MGI:3033217	hm	abnormal nervous system physiology
Slc1a3<tm1Kta>/Slc1a3<tm1Kta>	involves: 129P2/OlaHsd	MGI:3033217	hm	abnormal Purkinje cell morphology
Slc1a3<tm1Kta>/Slc1a3<tm1Kta>	involves: 129P2/OlaHsd	MGI:3033217	hm	abnormal synaptic glutamate release
Slc1a3<tm1Kta>/Slc1a3<tm1Kta>	involves: 129P2/OlaHsd	MGI:3033217	hm	behavior/neurological phenotype
Slc1a3<tm1Kta>/Slc1a3<tm1Kta>	involves: 129P2/OlaHsd	MGI:3033217	hm	cochlear inner hair cell degeneration
Slc1a3<tm1Kta>/Slc1a3<tm1Kta>	involves: 129P2/OlaHsd	MGI:3033217	hm	increased or absent threshold for auditory brainstem response
Slc1a3<tm1Kta>/Slc1a3<tm1Kta>	involves: 129P2/OlaHsd	MGI:3033217	hm	increased susceptibility to noise-induced hearing loss
Slc1a3<tm1Kta>/Slc1a3<tm1Kta>	involves: 129P2/OlaHsd	MGI:3033217	hm	increased susceptibility to ototoxicity-induced hearing loss
Slc1a3<tm1Kta>/Slc1a3<tm1Kta>	involves: 129P2/OlaHsd	MGI:3033217	hm	increased susceptibility to pharmacologically induced seizures
Slc1a3<tm1Kta>/Slc1a3<tm1Kta>	involves: 129P2/OlaHsd	MGI:3033217	hm	nervous system phenotype
Slc1a3<tm1Kta>/Slc1a3<tm1Kta>	involves: 129P2/OlaHsd	MGI:3033217	hm	seizures
Slc1a3<tm1Wst>/Slc1a3<tm1Wst>	involves: 129S1/Sv * 129X1/SvJ	MGI:3056590	hm	abnormal excitatory postsynaptic currents
Slc4a4<tm1.1Slin>/Slc4a4<tm1.1Slin>	involves: 129S1/Sv * 129X1/SvJ * C57BL/6	MGI:5433858	hm	abnormal blood circulation
Slc4a4<tm1.1Slin>/Slc4a4<tm1.1Slin>	involves: 129S1/Sv * 129X1/SvJ * C57BL/6	MGI:5433858	hm	abnormal blood homeostasis
Slc4a4<tm1.1Slin>/Slc4a4<tm1.1Slin>	involves: 129S1/Sv * 129X1/SvJ * C57BL/6	MGI:5433858	hm	abnormal compact bone morphology
Slc4a4<tm1.1Slin>/Slc4a4<tm1.1Slin>	involves: 129S1/Sv * 129X1/SvJ * C57BL/6	MGI:5433858	hm	abnormal intestine morphology
Slc4a4<tm1.1Slin>/Slc4a4<tm1.1Slin>	involves: 129S1/Sv * 129X1/SvJ * C57BL/6	MGI:5433858	hm	abnormal intestine physiology
Slc4a4<tm1.1Slin>/Slc4a4<tm1.1Slin>	involves: 129S1/Sv * 129X1/SvJ * C57BL/6	MGI:5433858	hm	abnormal renal reabsorbtion
Slc4a4<tm1.1Slin>/Slc4a4<tm1.1Slin>	involves: 129S1/Sv * 129X1/SvJ * C57BL/6	MGI:5433858	hm	abnormal renal tubule epithelium morphology
Slc4a4<tm1.1Slin>/Slc4a4<tm1.1Slin>	involves: 129S1/Sv * 129X1/SvJ * C57BL/6	MGI:5433858	hm	abnormal skeleton morphology
Slc4a4<tm1.1Slin>/Slc4a4<tm1.1Slin>	involves: 129S1/Sv * 129X1/SvJ * C57BL/6	MGI:5433858	hm	abnormal urine homeostasis
Slc4a4<tm1.1Slin>/Slc4a4<tm1.1Slin>	involves: 129S1/Sv * 129X1/SvJ * C57BL/6	MGI:5433858	hm	acidemia
Slc4a4<tm1.1Slin>/Slc4a4<tm1.1Slin>	involves: 129S1/Sv * 129X1/SvJ * C57BL/6	MGI:5433858	hm	acidosis
Slc4a4<tm1.1Slin>/Slc4a4<tm1.1Slin>	involves: 129S1/Sv * 129X1/SvJ * C57BL/6	MGI:5433858	hm	anemia
Slc4a4<tm1.1Slin>/Slc4a4<tm1.1Slin>	involves: 129S1/Sv * 129X1/SvJ * C57BL/6	MGI:5433858	hm	complete postnatal lethality
Slc4a4<tm1.1Slin>/Slc4a4<tm1.1Slin>	involves: 129S1/Sv * 129X1/SvJ * C57BL/6	MGI:5433858	hm	corneal opacity
Slc4a4<tm1.1Slin>/Slc4a4<tm1.1Slin>	involves: 129S1/Sv * 129X1/SvJ * C57BL/6	MGI:5433858	hm	decreased body size
Slc4a4<tm1.1Slin>/Slc4a4<tm1.1Slin>	involves: 129S1/Sv * 129X1/SvJ * C57BL/6	MGI:5433858	hm	decreased gastrocnemius weight
Slc4a4<tm1.1Slin>/Slc4a4<tm1.1Slin>	involves: 129S1/Sv * 129X1/SvJ * C57BL/6	MGI:5433858	hm	decreased hemoglobin content
Slc4a4<tm1.1Slin>/Slc4a4<tm1.1Slin>	involves: 129S1/Sv * 129X1/SvJ * C57BL/6	MGI:5433858	hm	decreased kidney weight
Slc4a4<tm1.1Slin>/Slc4a4<tm1.1Slin>	involves: 129S1/Sv * 129X1/SvJ * C57BL/6	MGI:5433858	hm	decreased length of long bones
Slc4a4<tm1.1Slin>/Slc4a4<tm1.1Slin>	involves: 129S1/Sv * 129X1/SvJ * C57BL/6	MGI:5433858	hm	decreased urine osmolality
Slc4a4<tm1.1Slin>/Slc4a4<tm1.1Slin>	involves: 129S1/Sv * 129X1/SvJ * C57BL/6	MGI:5433858	hm	decreased urine pH
Slc4a4<tm1.1Slin>/Slc4a4<tm1.1Slin>	involves: 129S1/Sv * 129X1/SvJ * C57BL/6	MGI:5433858	hm	dilated renal tubules
Slc4a4<tm1.1Slin>/Slc4a4<tm1.1Slin>	involves: 129S1/Sv * 129X1/SvJ * C57BL/6	MGI:5433858	hm	edema
Slc4a4<tm1.1Slin>/Slc4a4<tm1.1Slin>	involves: 129S1/Sv * 129X1/SvJ * C57BL/6	MGI:5433858	hm	enlarged spleen
Slc4a4<tm1.1Slin>/Slc4a4<tm1.1Slin>	involves: 129S1/Sv * 129X1/SvJ * C57BL/6	MGI:5433858	hm	increased circulating aldosterone level
Slc4a4<tm1.1Slin>/Slc4a4<tm1.1Slin>	involves: 129S1/Sv * 129X1/SvJ * C57BL/6	MGI:5433858	hm	increased circulating calcium level
Slc4a4<tm1.1Slin>/Slc4a4<tm1.1Slin>	involves: 129S1/Sv * 129X1/SvJ * C57BL/6	MGI:5433858	hm	increased circulating renin level
Slc4a4<tm1.1Slin>/Slc4a4<tm1.1Slin>	involves: 129S1/Sv * 129X1/SvJ * C57BL/6	MGI:5433858	hm	increased long bone epiphyseal plate size
Slc4a4<tm1.1Slin>/Slc4a4<tm1.1Slin>	involves: 129S1/Sv * 129X1/SvJ * C57BL/6	MGI:5433858	hm	increased spleen weight
Slc4a4<tm1.1Slin>/Slc4a4<tm1.1Slin>	involves: 129S1/Sv * 129X1/SvJ * C57BL/6	MGI:5433858	hm	increased urine calcium level
Slc4a4<tm1.1Slin>/Slc4a4<tm1.1Slin>	involves: 129S1/Sv * 129X1/SvJ * C57BL/6	MGI:5433858	hm	increased urine sodium level
Slc4a4<tm1.1Slin>/Slc4a4<tm1.1Slin>	involves: 129S1/Sv * 129X1/SvJ * C57BL/6	MGI:5433858	hm	postnatal growth retardation
Slc4a4<tm1.1Slin>/Slc4a4<tm1.1Slin>	involves: 129S1/Sv * 129X1/SvJ * C57BL/6	MGI:5433858	hm	renal tubular acidosis
Slc4a4<tm1.1Slin>/Slc4a4<tm1.1Slin>	involves: 129S1/Sv * 129X1/SvJ * C57BL/6	MGI:5433858	hm	Renal Tubular Acidosis, Proximal
Slc4a4<tm1.1Slin>/Slc4a4<tm1.1Slin>	involves: 129S1/Sv * 129X1/SvJ * C57BL/6	MGI:5433858	hm	renal tubule atrophy
Slc4a4<tm1.1Slin>/Slc4a4<tm1.1Slin>	involves: 129S1/Sv * 129X1/SvJ * C57BL/6	MGI:5433858	hm	reticulocytosis
Slc4a4<tm1.1Slin>/Slc4a4<tm1.1Slin>	involves: 129S1/Sv * 129X1/SvJ * C57BL/6	MGI:5433858	hm	uremia
Slc4a4<tm1Ges>/Slc4a4<tm1Ges>	involves: 129S6/SvEvTac * Black Swiss	MGI:3710674	hm	abnormal cranium morphology
Slc4a4<tm1Ges>/Slc4a4<tm1Ges>	involves: 129S6/SvEvTac * Black Swiss	MGI:3710674	hm	abnormal ion homeostasis
Slc4a4<tm1Ges>/Slc4a4<tm1Ges>	involves: 129S6/SvEvTac * Black Swiss	MGI:3710674	hm	abnormal megakaryocyte morphology
Slc4a4<tm1Ges>/Slc4a4<tm1Ges>	involves: 129S6/SvEvTac * Black Swiss	MGI:3710674	hm	abnormal spleen B cell follicle morphology
Slc4a4<tm1Ges>/Slc4a4<tm1Ges>	involves: 129S6/SvEvTac * Black Swiss	MGI:3710674	hm	acidosis
Slc4a4<tm1Ges>/Slc4a4<tm1Ges>	involves: 129S6/SvEvTac * Black Swiss	MGI:3710674	hm	brittle teeth
Slc4a4<tm1Ges>/Slc4a4<tm1Ges>	involves: 129S6/SvEvTac * Black Swiss	MGI:3710674	hm	coiled cecum
Slc4a4<tm1Ges>/Slc4a4<tm1Ges>	involves: 129S6/SvEvTac * Black Swiss	MGI:3710674	hm	complete postnatal lethality
Slc4a4<tm1Ges>/Slc4a4<tm1Ges>	involves: 129S6/SvEvTac * Black Swiss	MGI:3710674	hm	constipation
Slc4a4<tm1Ges>/Slc4a4<tm1Ges>	involves: 129S6/SvEvTac * Black Swiss	MGI:3710674	hm	decreased birth body size
Slc4a4<tm1Ges>/Slc4a4<tm1Ges>	involves: 129S6/SvEvTac * Black Swiss	MGI:3710674	hm	decreased body size
Slc4a4<tm1Ges>/Slc4a4<tm1Ges>	involves: 129S6/SvEvTac * Black Swiss	MGI:3710674	hm	decreased body weight
Slc4a4<tm1Ges>/Slc4a4<tm1Ges>	involves: 129S6/SvEvTac * Black Swiss	MGI:3710674	hm	decreased circulating bicarbonate level
Slc4a4<tm1Ges>/Slc4a4<tm1Ges>	involves: 129S6/SvEvTac * Black Swiss	MGI:3710674	hm	decreased circulating sodium level
Slc4a4<tm1Ges>/Slc4a4<tm1Ges>	involves: 129S6/SvEvTac * Black Swiss	MGI:3710674	hm	decreased hematocrit
Slc4a4<tm1Ges>/Slc4a4<tm1Ges>	involves: 129S6/SvEvTac * Black Swiss	MGI:3710674	hm	decreased lymphocyte cell number
Slc4a4<tm1Ges>/Slc4a4<tm1Ges>	involves: 129S6/SvEvTac * Black Swiss	MGI:3710674	hm	enlarged spleen
Slc4a4<tm1Ges>/Slc4a4<tm1Ges>	involves: 129S6/SvEvTac * Black Swiss	MGI:3710674	hm	increased circulating aldosterone level
Slc4a4<tm1Ges>/Slc4a4<tm1Ges>	involves: 129S6/SvEvTac * Black Swiss	MGI:3710674	hm	increased nucleated erythrocyte cell number
Slc4a4<tm1Ges>/Slc4a4<tm1Ges>	involves: 129S6/SvEvTac * Black Swiss	MGI:3710674	hm	increased spleen red pulp amount
Slc4a4<tm1Ges>/Slc4a4<tm1Ges>	involves: 129S6/SvEvTac * Black Swiss	MGI:3710674	hm	increased spleen white pulp amount
Slc4a4<tm1Ges>/Slc4a4<tm1Ges>	involves: 129S6/SvEvTac * Black Swiss	MGI:3710674	hm	intestinal obstruction
Slc4a4<tm1Ges>/Slc4a4<tm1Ges>	involves: 129S6/SvEvTac * Black Swiss	MGI:3710674	hm	nervous system phenotype
Slc4a4<tm1Ges>/Slc4a4<tm1Ges>	involves: 129S6/SvEvTac * Black Swiss	MGI:3710674	hm	pallor
Slc4a4<tm1Ges>/Slc4a4<tm1Ges>	involves: 129S6/SvEvTac * Black Swiss	MGI:3710674	hm	postnatal growth retardation
Slc4a4<tm1Ges>/Slc4a4<tm1Ges>	involves: 129S6/SvEvTac * Black Swiss	MGI:3710674	hm	small cecum
Slc4a4<tm1Ges>/Slc4a4<tm1Ges>	involves: 129S6/SvEvTac * Black Swiss	MGI:3710674	hm	Solute Carrier Family 4 (anion Exchanger), Member 1
Slc4a4<tm1Ges>/Slc4a4<tm1Ges>	involves: 129S6/SvEvTac * Black Swiss	MGI:3710674	hm	vision/eye phenotype
Slc7a10<tm1Dgen>/Slc7a10<tm1Dgen>	involves: 129P2/OlaHsd * C57BL/6	MGI:3716647	hm	abnormal amino acid level
Slc7a10<tm1Dgen>/Slc7a10<tm1Dgen>	involves: 129P2/OlaHsd * C57BL/6	MGI:3716647	hm	abnormal CNS synaptic transmission
Slc7a10<tm1Dgen>/Slc7a10<tm1Dgen>	involves: 129P2/OlaHsd * C57BL/6	MGI:3716647	hm	abnormal excitatory postsynaptic potential
Slc7a10<tm1Dgen>/Slc7a10<tm1Dgen>	involves: 129P2/OlaHsd * C57BL/6	MGI:3716647	hm	abnormal nervous system physiology
Slc7a10<tm1Dgen>/Slc7a10<tm1Dgen>	involves: 129P2/OlaHsd * C57BL/6	MGI:3716647	hm	ataxia
Slc7a10<tm1Dgen>/Slc7a10<tm1Dgen>	involves: 129P2/OlaHsd * C57BL/6	MGI:3716647	hm	decreased body size
Slc7a10<tm1Dgen>/Slc7a10<tm1Dgen>	involves: 129P2/OlaHsd * C57BL/6	MGI:3716647	hm	decreased body weight
Slc7a10<tm1Dgen>/Slc7a10<tm1Dgen>	involves: 129P2/OlaHsd * C57BL/6	MGI:3716647	hm	hunched posture
Slc7a10<tm1Dgen>/Slc7a10<tm1Dgen>	involves: 129P2/OlaHsd * C57BL/6	MGI:3716647	hm	hypoactivity
Slc7a10<tm1Dgen>/Slc7a10<tm1Dgen>	involves: 129P2/OlaHsd * C57BL/6	MGI:3716647	hm	myoclonus
Slc7a10<tm1Dgen>/Slc7a10<tm1Dgen>	involves: 129P2/OlaHsd * C57BL/6	MGI:3716647	hm	partial postnatal lethality
Slc7a10<tm1Dgen>/Slc7a10<tm1Dgen>	involves: 129P2/OlaHsd * C57BL/6	MGI:3716647	hm	premature death
Slc7a10<tm1Dgen>/Slc7a10<tm1Dgen>	involves: 129P2/OlaHsd * C57BL/6	MGI:3716647	hm	seizures
Slc7a10<tm1Dgen>/Slc7a10<tm1Dgen>	involves: 129P2/OlaHsd * C57BL/6	MGI:3716647	hm	tonic-clonic seizures
Slc7a10<tm1Dgen>/Slc7a10<tm1Dgen>	involves: 129P2/OlaHsd * C57BL/6	MGI:3716647	hm	tremors
Spire1<Gt(OST416113)Lex>/Spire1<Gt(OST416113)Lex>	involves: 129S5/SvEvBrd * C57BL/6	MGI:5699172	hm	behavior/neurological phenotype
Spire1<Gt(OST416113)Lex>/Spire1<Gt(OST416113)Lex>	involves: 129S5/SvEvBrd * C57BL/6	MGI:5699172	hm	enhanced contextual conditioning behavior
Spire1<Gt(OST416113)Lex>/Spire1<Gt(OST416113)Lex>	involves: 129S5/SvEvBrd * C57BL/6	MGI:5699172	hm	enhanced cued conditioning behavior
Spire1<Gt(OST416113)Lex>/Spire1<Gt(OST416113)Lex>	involves: 129S5/SvEvBrd * C57BL/6	MGI:5699172	hm	growth/size/body region phenotype
Spire1<Gt(OST416113)Lex>/Spire1<Gt(OST416113)Lex>	involves: 129S5/SvEvBrd * C57BL/6	MGI:5699172	hm	integument phenotype
Spire1<Gt(OST416113)Lex>/Spire1<Gt(OST416113)Lex>	involves: 129S5/SvEvBrd * C57BL/6	MGI:5699172	hm	nervous system phenotype
Spire1<Gt(OST416113)Lex>/Spire1<Gt(OST416113)Lex>	involves: 129S5/SvEvBrd * C57BL/6	MGI:5699172	hm	reproductive system phenotype
Spire1<Gt(OST416113)Lex>/Spire1<Gt(OST416113)Lex>	involves: 129S5/SvEvBrd * C57BL/6	MGI:5699172	hm	skeleton phenotype
Spire1<Gt(OST416113)Lex>/Spire1<Gt(OST416113)Lex>	involves: 129S5/SvEvBrd * C57BL/6	MGI:5699172	hm	vision/eye phenotype
Tlr3<tm1Flv>/Tlr3<tm1Flv>	B6.129S1-Tlr3<tm1Flv>	MGI:5013822	hm	abnormal axon morphology
Tlr3<tm1Flv>/Tlr3<tm1Flv>	B6.129S1-Tlr3<tm1Flv>	MGI:5013822	hm	abnormal cytokine level
Tlr3<tm1Flv>/Tlr3<tm1Flv>	B6.129S1-Tlr3<tm1Flv>	MGI:5013822	hm	abnormal interleukin level
Tlr3<tm1Flv>/Tlr3<tm1Flv>	B6.129S1-Tlr3<tm1Flv>	MGI:5013822	hm	abnormal neuron physiology
Tlr3<tm1Flv>/Tlr3<tm1Flv>	B6.129S1-Tlr3<tm1Flv>	MGI:5013822	hm	abnormal respiratory system physiology
Tlr3<tm1Flv>/Tlr3<tm1Flv>	B6.129S1-Tlr3<tm1Flv>	MGI:5013822	hm	altered righting response
Tlr3<tm1Flv>/Tlr3<tm1Flv>	B6.129S1-Tlr3<tm1Flv>	MGI:5013822	hm	delayed wound healing
Tlr3<tm1Flv>/Tlr3<tm1Flv>	B6.129S1-Tlr3<tm1Flv>	MGI:5013822	hm	increased tumor incidence
Tlr3<tm1Flv>/Tlr3<tm1Flv>	involves: 129S1/Sv	MGI:5013821	hm	abnormal circulating protein level
Tlr3<tm1Flv>/Tlr3<tm1Flv>	involves: 129S1/Sv	MGI:5013821	hm	abnormal cytokine level
Tlr3<tm1Flv>/Tlr3<tm1Flv>	involves: 129S1/Sv	MGI:5013821	hm	abnormal interferon level
Tlr3<tm1Flv>/Tlr3<tm1Flv>	involves: 129S1/Sv	MGI:5013821	hm	abnormal interleukin level
Tlr3<tm1Flv>/Tlr3<tm1Flv>	involves: 129S1/Sv	MGI:5013821	hm	abnormal pancreatic beta cell physiology
Tlr3<tm1Flv>/Tlr3<tm1Flv>	involves: 129S1/Sv	MGI:5013821	hm	abnormal pancreatic islet morphology
Tlr3<tm1Flv>/Tlr3<tm1Flv>	involves: 129S1/Sv	MGI:5013821	hm	abnormal postimplantation uterine environment
Tlr3<tm1Flv>/Tlr3<tm1Flv>	involves: 129S1/Sv	MGI:5013821	hm	abnormal pregnancy
Tlr3<tm1Flv>/Tlr3<tm1Flv>	involves: 129S1/Sv	MGI:5013821	hm	abnormal tumor necrosis factor level
Tlr3<tm1Flv>/Tlr3<tm1Flv>	involves: 129S1/Sv	MGI:5013821	hm	decreased pancreatic beta cell mass
Tlr3<tm1Flv>/Tlr3<tm1Flv>	involves: 129S1/Sv	MGI:5013821	hm	decreased susceptibility to viral infection
Tlr3<tm1Flv>/Tlr3<tm1Flv>	involves: 129S1/Sv	MGI:5013821	hm	decreased susceptibility to viral infection induced morbidity/mortality
Tlr3<tm1Flv>/Tlr3<tm1Flv>	involves: 129S1/Sv	MGI:5013821	hm	heart inflammation
Tlr3<tm1Flv>/Tlr3<tm1Flv>	involves: 129S1/Sv	MGI:5013821	hm	hyperglycemia
Tlr3<tm1Flv>/Tlr3<tm1Flv>	involves: 129S1/Sv	MGI:5013821	hm	increased pancreatic islet number
Tlr3<tm1Flv>/Tlr3<tm1Flv>	involves: 129S1/Sv	MGI:5013821	hm	increased susceptibility to viral infection induced morbidity/mortality
Tlr3<tm1Flv>/Tlr3<tm1Flv>	involves: 129S1/Sv * C57BL/6	MGI:2653141	hm	abnormal B cell physiology
Tlr3<tm1Flv>/Tlr3<tm1Flv>	involves: 129S1/Sv * C57BL/6	MGI:2653141	hm	abnormal dentate gyrus morphology
Tlr3<tm1Flv>/Tlr3<tm1Flv>	involves: 129S1/Sv * C57BL/6	MGI:2653141	hm	abnormal emotion/affect behavior
Tlr3<tm1Flv>/Tlr3<tm1Flv>	involves: 129S1/Sv * C57BL/6	MGI:2653141	hm	abnormal fear-related response
Tlr3<tm1Flv>/Tlr3<tm1Flv>	involves: 129S1/Sv * C57BL/6	MGI:2653141	hm	abnormal hippocampus CA1 region morphology
Tlr3<tm1Flv>/Tlr3<tm1Flv>	involves: 129S1/Sv * C57BL/6	MGI:2653141	hm	abnormal hippocampus development
Tlr3<tm1Flv>/Tlr3<tm1Flv>	involves: 129S1/Sv * C57BL/6	MGI:2653141	hm	abnormal learning/memory/conditioning
Tlr3<tm1Flv>/Tlr3<tm1Flv>	involves: 129S1/Sv * C57BL/6	MGI:2653141	hm	abnormal long term spatial reference memory
Tlr3<tm1Flv>/Tlr3<tm1Flv>	involves: 129S1/Sv * C57BL/6	MGI:2653141	hm	abnormal macrophage physiology
Tlr3<tm1Flv>/Tlr3<tm1Flv>	involves: 129S1/Sv * C57BL/6	MGI:2653141	hm	abnormal response to novel object
Tlr3<tm1Flv>/Tlr3<tm1Flv>	involves: 129S1/Sv * C57BL/6	MGI:2653141	hm	abnormal spatial working memory
Tlr3<tm1Flv>/Tlr3<tm1Flv>	involves: 129S1/Sv * C57BL/6	MGI:2653141	hm	abnormal vascular wound healing
Tlr3<tm1Flv>/Tlr3<tm1Flv>	involves: 129S1/Sv * C57BL/6	MGI:2653141	hm	decreased anxiety-related response
Tlr3<tm1Flv>/Tlr3<tm1Flv>	involves: 129S1/Sv * C57BL/6	MGI:2653141	hm	decreased fear-related response
Tlr3<tm1Flv>/Tlr3<tm1Flv>	involves: 129S1/Sv * C57BL/6	MGI:2653141	hm	decreased inflammatory response
Tlr3<tm1Flv>/Tlr3<tm1Flv>	involves: 129S1/Sv * C57BL/6	MGI:2653141	hm	immune system phenotype
Tlr3<tm1Flv>/Tlr3<tm1Flv>	involves: 129S1/Sv * C57BL/6	MGI:2653141	hm	impaired coordination
Tlr3<tm1Flv>/Tlr3<tm1Flv>	involves: 129S1/Sv * C57BL/6	MGI:2653141	hm	increased fear-related response
Tlr3<tm1Flv>/Tlr3<tm1Flv>	involves: C57BL/6	MGI:3033874	hm	abnormal macrophage physiology
Tlr3<tm1Flv>/Tlr3<tm1Flv>	involves: C57BL/6	MGI:3033874	hm	immune system phenotype
Tlr3<tm1Flv>/Tlr3<tm1Flv>	Not Specified	MGI:3039447	hm	abnormal cytokine secretion
Tlr3<tm1Flv>/Tlr3<tm1Flv>	Not Specified	MGI:3039447	hm	abnormal NK cell physiology
Tlr3<tm1Flv>/Tlr3<tm1Flv>	Not Specified	MGI:3039447	hm	abnormal NK T cell physiology
Tlr3<tm1Flv>/Tlr3<tm1Flv>	Not Specified	MGI:3039447	hm	increased susceptibility to viral infection
Tlr3<tm1Ttg>/Tlr3<tm1Ttg>	involves: 129P2/OlaHsd	MGI:3698173	hm	abnormal dendritic cell physiology
Tlr3<tm1Ttg>/Tlr3<tm1Ttg>	involves: 129P2/OlaHsd	MGI:3698173	hm	abnormal vascular smooth muscle physiology
Tnfrsf19<tm1Shmi>/Tnfrsf19<tm1Shmi>	involves: 129/Sv * C57BL/6	MGI:3579519	hm	abnormal neuron physiology
Tnfrsf19<tm1Shmi>/Tnfrsf19<tm1Shmi>	involves: 129/Sv * C57BL/6	MGI:3579519	hm	abnormal response/metabolism to endogenous compounds
Tpmt<tm1Rlng>/Tpmt<tm1Rlng>	involves: 129P2/OlaHsd * C57BL/6 * NMRI	MGI:3712780	hm	abnormal blood cell morphology/development
Tpmt<tm1Rlng>/Tpmt<tm1Rlng>	involves: 129P2/OlaHsd * C57BL/6 * NMRI	MGI:3712780	hm	abnormal nucleotide metabolism
Tpmt<tm1Rlng>/Tpmt<tm1Rlng>	involves: 129P2/OlaHsd * C57BL/6 * NMRI	MGI:3712780	hm	increased sensitivity to xenobiotic induced morbidity/mortality
Tpmt<tm1Rlng>/Tpmt<tm1Rlng>	involves: 129P2/OlaHsd * C57BL/6 * NMRI	MGI:3712780	hm	reproductive system phenotype
Tpmt<tm1Rlng>/Tpmt<tm1Rlng>	involves: 129P2/OlaHsd * C57BL/6 * NMRI	MGI:3712780	hm	Thiopurine S-Methyltransferase Deficiency
Tpmt<tm1Rlng>/Tpmt<tm1Rlng>	involves: 129P2/OlaHsd * C57BL/6 * NMRI	MGI:3712780	hm	thrombocytosis
Tpmt<tm1Rlng>/Tpmt<tm1Rlng>	involves: 129P2/OlaHsd * C57BL/6 * NMRI	MGI:3712780	hm	weight loss
Trim9<tm1.1Slgu>/Trim9<tm1.1Slgu>	involves: 129S4/SvJae * BALB/cJ * C57BL/6	MGI:5660342	hm	abnormal neuron differentiation
Trim9<tm1.1Slgu>/Trim9<tm1.1Slgu>	involves: 129S4/SvJae * BALB/cJ * C57BL/6	MGI:5660342	hm	abnormal neuron physiology
Trim9<tm1.1Slgu>/Trim9<tm1.1Slgu>	involves: 129S4/SvJae * BALB/cJ * C57BL/6	MGI:5660342	hm	increased corpus callosum size
Ttyh1<tm1Tohe>/Ttyh1<tm1Tohe>	involves: C57BL/6 * C57BL/6J * CBA	MGI:4818476	hm	abnormal cell nucleus morphology
Ttyh1<tm1Tohe>/Ttyh1<tm1Tohe>	involves: C57BL/6 * C57BL/6J * CBA	MGI:4818476	hm	abnormal mitosis
Ttyh1<tm1Tohe>/Ttyh1<tm1Tohe>	involves: C57BL/6 * C57BL/6J * CBA	MGI:4818476	hm	complete embryonic lethality before implantation
Ttyh1<tm1Tohe>/Ttyh1<tm1Tohe>	involves: C57BL/6 * C57BL/6J * CBA	MGI:4818476	hm	embryonic growth arrest
Ttyh1<tm1Tohe>/Ttyh1<tm1Tohe>	involves: C57BL/6 * C57BL/6J * CBA	MGI:4818476	hm	increased cell nucleus count

## Sheet: 27_Neuronal DRG
Genotype symbol	Genotype Background	Genotype Primary Identifier	Genotype Zygosity	Ontology Annotation						MP term	p-value (Bonferroni 0.05)	Genotype	MP Ontology Term
Acpp<tm1Pivi>/Acpp<tm1Pivi>	B6.Cg-Acpp<tm1Pivi>	MGI:5007486	hm	abnormal prostate gland dorsolateral lobe morphology						abnormal touch/ nociception	7.97883e-21	MGI:2175185,MGI:2181753,MGI:2446649,MGI:2451052,MGI:2655322,MGI:3029187,MGI:3043034,MGI:3055226,MGI:3606607,MGI:3625358,MGI:3639302,MGI:3696849,MGI:3834639,MGI:4354586,MGI:4417977,MGI:4418090,MGI:4430302,MGI:4430303,MGI:4947861,MGI:5007486,MGI:5298033	MP:0001968
Acpp<tm1Pivi>/Acpp<tm1Pivi>	B6.Cg-Acpp<tm1Pivi>	MGI:5007486	hm	abnormal prostate gland epithelium morphology						nervous system phenotype	5.55469e-20	MGI:2175009,MGI:2175146,MGI:2175185,MGI:2175186,MGI:2450868,MGI:2451052,MGI:2651729,MGI:2651730,MGI:2651768,MGI:2655322,MGI:2659084,MGI:2663154,MGI:2669096,MGI:2683143,MGI:3029187,MGI:3040967,MGI:3041396,MGI:3041398,MGI:3042863,MGI:3043032,MGI:3043034,MGI:3044432,MGI:3046280,MGI:3052172,MGI:3512564,MGI:3531406,MGI:3603825,MGI:3618119,MGI:3618121,MGI:3623107,MGI:3628454,MGI:3639301,MGI:3639302,MGI…	MP:0003631
Acpp<tm1Pivi>/Acpp<tm1Pivi>	B6.Cg-Acpp<tm1Pivi>	MGI:5007486	hm	allodynia						abnormal pain threshold	1.74937e-16	MGI:2175185,MGI:2181753,MGI:2446649,MGI:2451052,MGI:2655322,MGI:3043034,MGI:3055226,MGI:3625358,MGI:3639302,MGI:3834639,MGI:4354586,MGI:4417977,MGI:4430302,MGI:4430303,MGI:4947861,MGI:5007486,MGI:5298033	MP:0001970
Acpp<tm1Pivi>/Acpp<tm1Pivi>	B6.Cg-Acpp<tm1Pivi>	MGI:5007486	hm	decreased thermal nociceptive threshold						abnormal sensory capabilities/reflexes/nociception	3.97039e-14	MGI:2175185,MGI:2181753,MGI:2446649,MGI:2451052,MGI:2655322,MGI:3029187,MGI:3040967,MGI:3043034,MGI:3055226,MGI:3512564,MGI:3606607,MGI:3625358,MGI:3639302,MGI:3696849,MGI:3770677,MGI:3834639,MGI:4354586,MGI:4417977,MGI:4418090,MGI:4430302,MGI:4430303,MGI:4947861,MGI:5007486,MGI:5298033,MGI:5301304	MP:0002067
Acpp<tm1Pivi>/Acpp<tm1Pivi>	B6.Cg-Acpp<tm1Pivi>	MGI:5007486	hm	increased prostate gland adenocarcinoma incidence						hypoalgesia	4.19737e-12	MGI:2175185,MGI:2181753,MGI:2655322,MGI:3043034,MGI:3055226,MGI:3625358,MGI:3639302,MGI:3834639,MGI:4354586,MGI:4417977,MGI:4947861,MGI:5298033	MP:0003043
Acpp<tm1Pivi>/Acpp<tm1Pivi>	B6.Cg-Acpp<tm1Pivi>	MGI:5007486	hm	increased prostate intraepithelial neoplasia incidence						abnormal somatic sensory system morphology	4.92979e-12	MGI:2175185,MGI:2175186,MGI:2450868,MGI:2651730,MGI:2651768,MGI:3040967,MGI:3042863,MGI:3043032,MGI:3043034,MGI:3044432,MGI:3052172,MGI:3512564,MGI:3618119,MGI:3618121,MGI:3623107,MGI:3702322,MGI:3770677,MGI:3770685,MGI:3783340,MGI:3783341,MGI:3835511,MGI:4353648,MGI:4947861	MP:0000959
Acpp<tm1Pivi>/Acpp<tm1Pivi>	B6.Cg-Acpp<tm1Pivi>	MGI:5007486	hm	Prostate Cancer						abnormal thermal nociception	1.84225e-10	MGI:2175185,MGI:2181753,MGI:2451052,MGI:2655322,MGI:3029187,MGI:3043034,MGI:3625358,MGI:3834639,MGI:4417977,MGI:4947861,MGI:5007486	MP:0002733
Acpp<tm1Pivi>/Acpp<tm1Pivi>	B6.Cg-Acpp<tm1Pivi>	MGI:5007486	hm	prostate gland epithelial hyperplasia						abnormal somatic nervous system morphology	2.54186e-10	MGI:2175185,MGI:2175186,MGI:2450868,MGI:2651730,MGI:2651768,MGI:3040967,MGI:3042863,MGI:3043032,MGI:3043034,MGI:3044432,MGI:3052172,MGI:3512564,MGI:3618119,MGI:3618121,MGI:3623107,MGI:3702322,MGI:3770677,MGI:3770685,MGI:3783340,MGI:3783341,MGI:3835511,MGI:4353648,MGI:4440539,MGI:4947861	MP:0002752
Asic3<tm1Pho>/Asic3<tm1Pho>	B6.Cg-Acic3<tm1Pho>	MGI:4353627	hm	abnormal brainstem morphology						abnormal nervous system morphology	4.17385e-10	MGI:2175009,MGI:2175185,MGI:2175186,MGI:2450868,MGI:2651729,MGI:2651730,MGI:2651768,MGI:2659084,MGI:2663154,MGI:2669096,MGI:2683143,MGI:3040967,MGI:3041398,MGI:3042863,MGI:3043032,MGI:3043034,MGI:3044432,MGI:3046280,MGI:3052172,MGI:3512564,MGI:3531406,MGI:3603825,MGI:3618119,MGI:3618121,MGI:3623107,MGI:3628454,MGI:3662905,MGI:3692550,MGI:3702322,MGI:3719110,MGI:3770677,MGI:3770685,MGI:3773049,MGI…	MP:0003632
Asic3<tm1Pho>/Asic3<tm1Pho>	involves: C57BL/6	MGI:4353648	hm	abnormal eye electrophysiology						abnormal neuron morphology	4.03599e-09	MGI:2175009,MGI:2175185,MGI:2175186,MGI:2651730,MGI:2651768,MGI:2683143,MGI:3042863,MGI:3043032,MGI:3043034,MGI:3044432,MGI:3046280,MGI:3052172,MGI:3531406,MGI:3603825,MGI:3623107,MGI:3628454,MGI:3692550,MGI:3702322,MGI:3719110,MGI:3770677,MGI:3770685,MGI:3773049,MGI:3783340,MGI:3783341,MGI:3809496,MGI:3835511,MGI:4353648,MGI:4440539,MGI:4947861	MP:0002882
Asic3<tm1Pho>/Asic3<tm1Pho>	involves: C57BL/6	MGI:4353648	hm	abnormal retinal apoptosis						abnormal autonomic nervous system morphology	4.27065e-09	MGI:2175009,MGI:2175185,MGI:2651729,MGI:2651730,MGI:2651768,MGI:3623107,MGI:3628454,MGI:3692550,MGI:4820803,MGI:4820806	MP:0002751
Asic3<tm1Pho>/Asic3<tm1Pho>	involves: C57BL/6	MGI:4353648	hm	abnormal rod electrophysiology						abnormal innervation	3.75479e-08	MGI:2651730,MGI:3043032,MGI:3043034,MGI:3044432,MGI:3046280,MGI:3623107,MGI:3662905,MGI:3770677,MGI:3770685,MGI:3783340,MGI:3783341,MGI:4947861	MP:0002184
Asic3<tm1Pho>/Asic3<tm1Pho>	involves: C57BL/6	MGI:4353648	hm	abnormal sensory neuron morphology						abnormal superior cervical ganglion morphology	1.15259e-06	MGI:2175009,MGI:2175185,MGI:2651729,MGI:2651730,MGI:2651768,MGI:3623107	MP:0001011
Asic3<tm1Pho>/Asic3<tm1Pho>	involves: C57BL/6	MGI:4353648	hm	amacrine cell degeneration						small superior cervical ganglion	1.92829e-06	MGI:2175185,MGI:2651729,MGI:2651730,MGI:2651768,MGI:3623107	MP:0001015
Asic3<tm1Pho>/Asic3<tm1Pho>	involves: C57BL/6	MGI:4353648	hm	disorganized retinal inner nuclear layer						abnormal nociception after inflammation	3.21496e-06	MGI:2655322,MGI:3029187,MGI:3606607,MGI:3696849,MGI:4430303,MGI:4947861	MP:0002736
Asic3<tm1Pho>/Asic3<tm1Pho>	involves: C57BL/6	MGI:4353648	hm	disorganized retinal outer nuclear layer						abnormal paravertebral ganglion morphology	3.21496e-06	MGI:2175009,MGI:2175185,MGI:2651729,MGI:2651730,MGI:2651768,MGI:3623107	MP:0008317
Asic3<tm1Pho>/Asic3<tm1Pho>	involves: C57BL/6	MGI:4353648	hm	photoreceptor inner segment degeneration						abnormal mechanical nociception	4.01225e-06	MGI:2181753,MGI:2451052,MGI:4417977,MGI:4418090,MGI:4430303	MP:0002734
Asic3<tm1Pho>/Asic3<tm1Pho>	involves: C57BL/6	MGI:4353648	hm	photoreceptor outer segment degeneration						abnormal chemical nociception	5.63133e-06	MGI:2451052,MGI:2655322,MGI:3043034,MGI:3055226,MGI:3639302,MGI:3834639	MP:0002735
Asic3<tm1Pho>/Asic3<tm1Pho>	involves: C57BL/6	MGI:4353648	hm	retinal ganglion cell degeneration						abnormal nervous system physiology	7.39397e-06	MGI:2175146,MGI:2175185,MGI:2651729,MGI:2651730,MGI:2655322,MGI:2669096,MGI:2683143,MGI:3029187,MGI:3623107,MGI:3639301,MGI:3639302,MGI:3696849,MGI:3696956,MGI:3719110,MGI:3770685,MGI:3789611,MGI:3818308,MGI:3834639,MGI:4354586,MGI:4417977,MGI:4418196,MGI:4430302,MGI:4458087,MGI:4820803,MGI:5558030,MGI:5609010	MP:0003633
Asic3<tm1Pho>/Asic3<tm1Pho>	involves: C57BL/6	MGI:4353648	hm	retinal outer nuclear layer degeneration						increased thermal nociceptive threshold	9.71855e-06	MGI:2175185,MGI:2655322,MGI:3043034,MGI:3625358,MGI:3834639,MGI:4417977,MGI:4947861	MP:0001973
Asic3<tm1Pho>/Asic3<tm1Pho>	involves: C57BL/6	MGI:4353648	hm	thin retinal outer plexiform layer						abnormal sensory neuron morphology	1.06858e-05	MGI:2175186,MGI:2651730,MGI:2651768,MGI:3042863,MGI:3043032,MGI:3043034,MGI:3044432,MGI:3052172,MGI:3623107,MGI:3770677,MGI:3770685,MGI:3835511,MGI:4353648,MGI:4947861	MP:0000965
Asic3<tm1Pig>/Asic3<tm1Pig>	involves: 129/Sv * CD-1	MGI:2451052	hm	abnormal mechanical nociception						abnormal sensory ganglion morphology	1.28698e-05	MGI:2175185,MGI:2175186,MGI:2450868,MGI:3040967,MGI:3512564,MGI:3618119,MGI:3618121,MGI:3702322,MGI:3770677,MGI:3770685	MP:0000960
Asic3<tm1Pig>/Asic3<tm1Pig>	involves: 129/Sv * CD-1	MGI:2451052	hm	behavior/neurological phenotype						increased chemical nociceptive threshold	1.88152e-05	MGI:2655322,MGI:3043034,MGI:3055226,MGI:3639302,MGI:3834639	MP:0008531
Asic3<tm1Pig>/Asic3<tm1Pig>	involves: 129/Sv * CD-1	MGI:2451052	hm	decreased chemical nociceptive threshold						abnormal sympathetic ganglion morphology	2.74011e-05	MGI:2175009,MGI:2175185,MGI:2651729,MGI:2651730,MGI:2651768,MGI:3623107	MP:0001008
Asic3<tm1Pig>/Asic3<tm1Pig>	involves: 129/Sv * CD-1	MGI:2451052	hm	decreased thermal nociceptive threshold						abnormal sympathetic system morphology	7.76473e-05	MGI:2175009,MGI:2175185,MGI:2651729,MGI:2651730,MGI:2651768,MGI:3623107	MP:0001007
Asic3<tm1Pig>/Asic3<tm1Pig>	involves: 129/Sv * CD-1	MGI:2451052	hm	hyperresponsive to tactile stimuli						abnormal enteric nervous system morphology	8.30851e-05	MGI:2175009,MGI:3623107,MGI:3628454,MGI:3692550,MGI:4820803,MGI:4820806	MP:0001044
Asic3<tm1Pig>/Asic3<tm1Pig>	involves: 129/Sv * CD-1	MGI:2451052	hm	nervous system phenotype						abnormal nervous system electrophysiology	0.000110798	MGI:2655322,MGI:3029187,MGI:3639301,MGI:3696849,MGI:3818308,MGI:4354586,MGI:4417977,MGI:4430302,MGI:5558030,MGI:5609010	MP:0002272
Asic3<tm1Wsh>/Asic3<tm1Wsh>	B6.129-Asic3<tm1Wsh>	MGI:4418090	hm	abnormal mechanical nociception						absent enteric neurons	0.000444182	MGI:2175009,MGI:3623107,MGI:3628454,MGI:3692550	MP:0001048
Asic3<tm1Wsh>/Asic3<tm1Wsh>	B6.129-Asic3<tm1Wsh>	MGI:4418090	hm	abnormal physiological response to xenobiotic						blepharoptosis	0.00164759	MGI:2175185,MGI:2651730,MGI:2651768,MGI:3045595	MP:0001344
Asic3<tm1Wsh>/Asic3<tm1Wsh>	involves: 129S1/Sv * 129X1/SvJ	MGI:4354586	hm	abnormal nervous system electrophysiology						absent kidney	0.00230927	MGI:2175009,MGI:3623107,MGI:3628454,MGI:3692550,MGI:4820803,MGI:4820806	MP:0000520
Asic3<tm1Wsh>/Asic3<tm1Wsh>	involves: 129S1/Sv * 129X1/SvJ	MGI:4354586	hm	hyporesponsive to tactile stimuli						abnormal trigeminal ganglion morphology	0.00254106	MGI:2175185,MGI:3040967,MGI:3512564,MGI:3618119,MGI:3770685	MP:0001092
Asic3<tm1Wsh>/Asic3<tm1Wsh>	involves: 129S1/Sv * 129X1/SvJ * C57BL	MGI:2446649	hm	hyperalgesia						abnormal neuron physiology	0.00369994	MGI:2175146,MGI:2651729,MGI:2651730,MGI:2655322,MGI:2683143,MGI:3623107,MGI:3770685,MGI:3834639,MGI:4417977,MGI:4458087,MGI:4820803	MP:0004811
Asic3<tm1Wsh>/Asic3<tm1Wsh>	involves: 129S1/Sv * 129X1/SvJ * C57BL	MGI:2446649	hm	increased or absent threshold for auditory brainstem response						abnormal sensory neuron innervation pattern	0.00980962	MGI:3043032,MGI:3043034,MGI:3044432,MGI:3770677,MGI:3770685,MGI:4947861	MP:0000968
Avil<tm1(ALPP)Fawa>/Avil<tm1(ALPP)Fawa>	involves: 129P2/OlaHsd	MGI:3789611	hm	abnormal central nervous system regeneration						abnormal behavior	0.0145575	MGI:2175185,MGI:2181753,MGI:2446649,MGI:2450868,MGI:2451052,MGI:2655322,MGI:2669096,MGI:3029187,MGI:3040967,MGI:3043034,MGI:3055226,MGI:3512564,MGI:3603436,MGI:3603825,MGI:3606607,MGI:3625358,MGI:3639302,MGI:3696849,MGI:3770677,MGI:3770685,MGI:3834639,MGI:4354586,MGI:4417977,MGI:4418090,MGI:4418196,MGI:4430302,MGI:4430303,MGI:4947861,MGI:5007486,MGI:5298033,MGI:5301304	MP:0004924
Avil<tm1(ALPP)Fawa>/Avil<tm1(ALPP)Fawa>	involves: 129P2/OlaHsd	MGI:3789611	hm	decreased survivor rate						behavior/neurological phenotype	0.0145575	MGI:2175185,MGI:2181753,MGI:2446649,MGI:2450868,MGI:2451052,MGI:2655322,MGI:2669096,MGI:2683143,MGI:3029187,MGI:3040967,MGI:3043034,MGI:3055226,MGI:3512564,MGI:3603436,MGI:3603825,MGI:3606607,MGI:3625358,MGI:3639302,MGI:3696849,MGI:3770677,MGI:3770685,MGI:3834639,MGI:4354586,MGI:4417977,MGI:4418090,MGI:4418196,MGI:4430302,MGI:4430303,MGI:4947861,MGI:5007486,MGI:5298033,MGI:5301304	MP:0005386
Avil<tm1(ALPP)Fawa>/Avil<tm1(ALPP)Fawa>	involves: 129P2/OlaHsd	MGI:3789611	hm	partial prenatal lethality						abnormal dorsal root ganglion morphology	0.0165624	MGI:2175185,MGI:2175186,MGI:2450868,MGI:3512564,MGI:3618121,MGI:3770677	MP:0000961
Bean1<tm1Shkr>/Bean1<tm1Shkr>	C57BL/6-Bean1<tm1Shkr>	MGI:5605285	hm	no abnormal phenotype detected						abnormal enteric neuron morphology	0.0213781	MGI:2175009,MGI:3623107,MGI:3628454,MGI:3692550	MP:0001046
Chrna6<tm1Nchx>/Chrna6<tm1Nchx>	involves: 129S2/SvPas * CD-1	MGI:2663154	hm	abnormal brain morphology						abnormal response to tactile stimuli	0.0244929	MGI:2175185,MGI:2451052,MGI:3043034,MGI:3625358,MGI:4354586	MP:0005316
Dhh<tm1Amc>/Dhh<tm1Amc>	involves: 129S1/Sv	MGI:2659066	hm	abnormal seminiferous tubule morphology						abnormal spinal reflex	0.0244929	MGI:2175185,MGI:2451052,MGI:3043034,MGI:3625358,MGI:4354586	MP:0012079
Dhh<tm1Amc>/Dhh<tm1Amc>	involves: 129S1/Sv	MGI:2659066	hm	abnormal Sertoli cell morphology						abnormal sympathetic neuron morphology	0.0440292	MGI:2651730,MGI:2651768,MGI:3623107	MP:0001025
Dhh<tm1Amc>/Dhh<tm1Amc>	involves: 129S1/Sv	MGI:2659066	hm	abnormal spermatid morphology						abnormal cranial ganglia morphology	0.0452363	MGI:2175185,MGI:3040967,MGI:3512564,MGI:3618119,MGI:3702322,MGI:3770685	MP:0001081
Dhh<tm1Amc>/Dhh<tm1Amc>	involves: 129S1/Sv	MGI:2659066	hm	arrest of spermatogenesis
Dhh<tm1Amc>/Dhh<tm1Amc>	involves: 129S1/Sv	MGI:2659066	hm	azoospermia
Dhh<tm1Amc>/Dhh<tm1Amc>	involves: 129S1/Sv	MGI:2659066	hm	male infertility
Dhh<tm1Amc>/Dhh<tm1Amc>	involves: 129S1/Sv	MGI:2659066	hm	small testis
Dhh<tm1Amc>/Dhh<tm1Amc>	involves: 129S1/Sv * C57BL/6J	MGI:2659067	hm	abnormal seminiferous tubule morphology
Dhh<tm1Amc>/Dhh<tm1Amc>	involves: 129S1/Sv * C57BL/6J	MGI:2659067	hm	abnormal Sertoli cell morphology
Dhh<tm1Amc>/Dhh<tm1Amc>	involves: 129S1/Sv * C57BL/6J	MGI:2659067	hm	abnormal spermatogenesis
Dhh<tm1Amc>/Dhh<tm1Amc>	involves: 129S1/Sv * C57BL/6J	MGI:2659067	hm	arrest of spermiogenesis
Dhh<tm1Amc>/Dhh<tm1Amc>	involves: 129S1/Sv * C57BL/6J	MGI:2659067	hm	azoospermia
Dhh<tm1Amc>/Dhh<tm1Amc>	involves: 129S1/Sv * C57BL/6J	MGI:2659067	hm	male infertility
Dhh<tm1Amc>/Dhh<tm1Amc>	involves: 129S1/Sv * C57BL/6J	MGI:2659067	hm	small testis
Dhh<tm1Amc>/Dhh<tm1Amc>	involves: 129S1/Sv * C57BL/6J * Swiss Webster	MGI:2659090	hm	46,xy Gonadal Dysgenesis, Partial, with Minifascicular Neuropathy
Dhh<tm1Amc>/Dhh<tm1Amc>	involves: 129S1/Sv * C57BL/6J * Swiss Webster	MGI:2659090	hm	abnormal anogenital distance
Dhh<tm1Amc>/Dhh<tm1Amc>	involves: 129S1/Sv * C57BL/6J * Swiss Webster	MGI:2659090	hm	abnormal Leydig cell morphology
Dhh<tm1Amc>/Dhh<tm1Amc>	involves: 129S1/Sv * C57BL/6J * Swiss Webster	MGI:2659090	hm	abnormal male germ cell morphology
Dhh<tm1Amc>/Dhh<tm1Amc>	involves: 129S1/Sv * C57BL/6J * Swiss Webster	MGI:2659090	hm	abnormal peritubular myoid cell morphology
Dhh<tm1Amc>/Dhh<tm1Amc>	involves: 129S1/Sv * C57BL/6J * Swiss Webster	MGI:2659090	hm	abnormal seminiferous tubule morphology
Dhh<tm1Amc>/Dhh<tm1Amc>	involves: 129S1/Sv * C57BL/6J * Swiss Webster	MGI:2659090	hm	abnormal Sertoli cell morphology
Dhh<tm1Amc>/Dhh<tm1Amc>	involves: 129S1/Sv * C57BL/6J * Swiss Webster	MGI:2659090	hm	abnormal spermatocyte morphology
Dhh<tm1Amc>/Dhh<tm1Amc>	involves: 129S1/Sv * C57BL/6J * Swiss Webster	MGI:2659090	hm	abnormal spermatogenesis
Dhh<tm1Amc>/Dhh<tm1Amc>	involves: 129S1/Sv * C57BL/6J * Swiss Webster	MGI:2659090	hm	abnormal spermatogonia morphology
Dhh<tm1Amc>/Dhh<tm1Amc>	involves: 129S1/Sv * C57BL/6J * Swiss Webster	MGI:2659090	hm	abnormal testis cord formation
Dhh<tm1Amc>/Dhh<tm1Amc>	involves: 129S1/Sv * C57BL/6J * Swiss Webster	MGI:2659090	hm	abnormal testis morphology
Dhh<tm1Amc>/Dhh<tm1Amc>	involves: 129S1/Sv * C57BL/6J * Swiss Webster	MGI:2659090	hm	cryptorchism
Dhh<tm1Amc>/Dhh<tm1Amc>	involves: 129S1/Sv * C57BL/6J * Swiss Webster	MGI:2659090	hm	decreased circulating testosterone level
Dhh<tm1Amc>/Dhh<tm1Amc>	involves: 129S1/Sv * C57BL/6J * Swiss Webster	MGI:2659090	hm	decreased number of peritubular myoid cells
Dhh<tm1Amc>/Dhh<tm1Amc>	involves: 129S1/Sv * C57BL/6J * Swiss Webster	MGI:2659090	hm	decreased testis weight
Dhh<tm1Amc>/Dhh<tm1Amc>	involves: 129S1/Sv * C57BL/6J * Swiss Webster	MGI:2659090	hm	increased circulating luteinizing hormone level
Dhh<tm1Amc>/Dhh<tm1Amc>	involves: 129S1/Sv * C57BL/6J * Swiss Webster	MGI:2659090	hm	Leydig cell hyperplasia
Dhh<tm1Amc>/Dhh<tm1Amc>	involves: 129S1/Sv * C57BL/6J * Swiss Webster	MGI:2659090	hm	Leydig cell hypoplasia
Dhh<tm1Amc>/Dhh<tm1Amc>	involves: 129S1/Sv * C57BL/6J * Swiss Webster	MGI:2659090	hm	male infertility
Dhh<tm1Amc>/Dhh<tm1Amc>	involves: 129S1/Sv * C57BL/6J * Swiss Webster	MGI:2659090	hm	male pseudohermaphroditism
Dhh<tm1Amc>/Dhh<tm1Amc>	involves: 129S1/Sv * C57BL/6J * Swiss Webster	MGI:2659090	hm	small testis
Dhh<tm1Amc>/Dhh<tm1Amc>	involves: 129/Sv	MGI:2659084	hm	abnormal nervous system morphology
Fkbp1b<tm1.1Okam>/Fkbp1b<tm1.1Okam>	ICR.129-Fkbp1b<tm1.1Okam>	MGI:3807881	hm	decreased insulin secretion
Fkbp1b<tm1.1Okam>/Fkbp1b<tm1.1Okam>	ICR.129-Fkbp1b<tm1.1Okam>	MGI:3807881	hm	homeostasis/metabolism phenotype
Fkbp1b<tm1.1Okam>/Fkbp1b<tm1.1Okam>	ICR.129-Fkbp1b<tm1.1Okam>	MGI:3807881	hm	impaired glucose tolerance
Fkbp1b<tm1Amks>/Fkbp1b<tm1Amks>	DBA/1LacJ-Fkbp1b<tm1Amks>	MGI:3623679	hm	irregular heartbeat
Fkbp1b<tm1Amks>/Fkbp1b<tm1Amks>	DBA/1LacJ-Fkbp1b<tm1Amks>	MGI:3623679	hm	premature death
Fkbp1b<tm1Amks>/Fkbp1b<tm1Amks>	DBA/1LacJ-Fkbp1b<tm1Amks>	MGI:3623679	hm	ventricular tachycardia
Fkbp1b<tm1Amks>/Fkbp1b<tm1Amks>	involves: DBA/1LacJ	MGI:5582596	hm	atrial fibrillation
Fkbp1b<tm1Syf>/Fkbp1b<tm1Syf>	either: (involves: 129S/SvEv) or (involves: 129S/SvEv * C57BL/6)	MGI:3624028	hm	abnormal interventricular septum morphology
Fkbp1b<tm1Syf>/Fkbp1b<tm1Syf>	either: (involves: 129S/SvEv) or (involves: 129S/SvEv * C57BL/6)	MGI:3624028	hm	cardiac hypertrophy
Fkbp1b<tm1Syf>/Fkbp1b<tm1Syf>	either: (involves: 129S/SvEv) or (involves: 129S/SvEv * C57BL/6)	MGI:3624028	hm	heart left ventricle hypertrophy
Fkbp1b<tm1Syf>/Fkbp1b<tm1Syf>	either: (involves: 129S/SvEv) or (involves: 129S/SvEv * C57BL/6)	MGI:3624028	hm	hypertension
Fkbp1b<tm1Syf>/Fkbp1b<tm1Syf>	either: (involves: 129S/SvEv) or (involves: 129S/SvEv * C57BL/6)	MGI:3624028	hm	increased heart weight
Fkbp1b<tm1Syf>/Fkbp1b<tm1Syf>	either: (involves: 129S/SvEv) or (involves: 129S/SvEv * C57BL/6)	MGI:3624028	hm	increased systemic arterial diastolic blood pressure
Fkbp1b<tm1Syf>/Fkbp1b<tm1Syf>	either: (involves: 129S/SvEv) or (involves: 129S/SvEv * C57BL/6)	MGI:3624028	hm	increased systemic arterial systolic blood pressure
Fkbp1b<tm1Syf>/Fkbp1b<tm1Syf>	either: (involves: 129S/SvEv) or (involves: 129S/SvEv * C57BL/6)	MGI:3624028	hm	increased ventricle muscle contractility
Fkbp1b<tm1Syf>/Fkbp1b<tm1Syf>	either: (involves: 129S/SvEv) or (involves: 129S/SvEv * C57BL/6)	MGI:3624028	hm	thick interventricular septum
Fkbp1b<tm1Syf>/Fkbp1b<tm1Syf>	either: (involves: 129S/SvEv) or (involves: 129S/SvEv * C57BL/6)	MGI:3624028	hm	thick ventricular wall
Gcnt2<tm1Tmu>/Gcnt2<tm1Tmu>	involves: 129S2/SvPas * C57BL/6	MGI:3603436	hm	abnormal renal tubule epithelium morphology
Gcnt2<tm1Tmu>/Gcnt2<tm1Tmu>	involves: 129S2/SvPas * C57BL/6	MGI:3603436	hm	decreased B cell number
Gcnt2<tm1Tmu>/Gcnt2<tm1Tmu>	involves: 129S2/SvPas * C57BL/6	MGI:3603436	hm	epithelioid cysts
Gcnt2<tm1Tmu>/Gcnt2<tm1Tmu>	involves: 129S2/SvPas * C57BL/6	MGI:3603436	hm	hypoactivity
Gcnt2<tm1Tmu>/Gcnt2<tm1Tmu>	involves: 129S2/SvPas * C57BL/6	MGI:3603436	hm	increased blood urea nitrogen level
Gcnt2<tm1Tmu>/Gcnt2<tm1Tmu>	involves: 129S2/SvPas * C57BL/6	MGI:3603436	hm	increased circulating creatinine level
Gfra3<tm1Adav>/Gfra3<tm1Adav>	involves: 129S1/Sv * 129X1/SvJ * C57BL/6 * CD-1	MGI:2651729	hm	abnormal neuronal precursor proliferation
Gfra3<tm1Adav>/Gfra3<tm1Adav>	involves: 129S1/Sv * 129X1/SvJ * C57BL/6 * CD-1	MGI:2651729	hm	abnormal superior cervical ganglion morphology
Gfra3<tm1Adav>/Gfra3<tm1Adav>	involves: 129S1/Sv * 129X1/SvJ * C57BL/6 * CD-1	MGI:2651729	hm	small superior cervical ganglion
Gfra3<tm1Hmd>/Gfra3<tm1Hmd>	involves: 129P2/OlaHsd * C57BL/6Cr	MGI:2651730	hm	abnormal neuronal migration
Gfra3<tm1Hmd>/Gfra3<tm1Hmd>	involves: 129P2/OlaHsd * C57BL/6Cr	MGI:2651730	hm	abnormal superior cervical ganglion morphology
Gfra3<tm1Hmd>/Gfra3<tm1Hmd>	involves: 129P2/OlaHsd * C57BL/6Cr	MGI:2651730	hm	abnormal sympathetic neuron innervation pattern
Gfra3<tm1Hmd>/Gfra3<tm1Hmd>	involves: 129P2/OlaHsd * C57BL/6Cr	MGI:2651730	hm	absent superior cervical ganglion
Gfra3<tm1Hmd>/Gfra3<tm1Hmd>	involves: 129P2/OlaHsd * C57BL/6Cr	MGI:2651730	hm	blepharoptosis
Gfra3<tm1Hmd>/Gfra3<tm1Hmd>	involves: 129P2/OlaHsd * C57BL/6Cr	MGI:2651730	hm	increased neuron apoptosis
Gfra3<tm1Hmd>/Gfra3<tm1Hmd>	involves: 129P2/OlaHsd * C57BL/6Cr	MGI:2651730	hm	small superior cervical ganglion
Gfra3<tm1Hmd>/Gfra3<tm1Hmd>	involves: 129P2/OlaHsd * C57BL/6Cr	MGI:2651730	hm	superior cervical ganglion degeneration
Gfra3<tm1Jmi>/Gfra3<tm1Jmi>	involves: 129X1/SvJ * FVB/N	MGI:2651768	hm	abnormal superior cervical ganglion morphology
Gfra3<tm1Jmi>/Gfra3<tm1Jmi>	involves: 129X1/SvJ * FVB/N	MGI:2651768	hm	abnormal sympathetic ganglion morphology
Gfra3<tm1Jmi>/Gfra3<tm1Jmi>	involves: 129X1/SvJ * FVB/N	MGI:2651768	hm	abnormal sympathetic neuron morphology
Gfra3<tm1Jmi>/Gfra3<tm1Jmi>	involves: 129X1/SvJ * FVB/N	MGI:2651768	hm	abnormal sympathetic system morphology
Gfra3<tm1Jmi>/Gfra3<tm1Jmi>	involves: 129X1/SvJ * FVB/N	MGI:2651768	hm	blepharoptosis
Gfra3<tm1Jmi>/Gfra3<tm1Jmi>	involves: 129X1/SvJ * FVB/N	MGI:2651768	hm	small superior cervical ganglion
Gfra3<tm1Wss>/Gfra3<tm1Wss>	involves: 129X1/SvJ * Black Swiss	MGI:3045595	hm	blepharoptosis
Grik1<tm1Sfh>/Grik1<tm1Sfh>	involves: 129S/SvEv	MGI:3639301	hm	abnormal inhibitory postsynaptic currents
Grik1<tm1Sfh>/Grik1<tm1Sfh>	involves: 129S/SvEv	MGI:3639301	hm	abnormal nervous system electrophysiology
Grik1<tm1Sfh>/Grik1<tm1Sfh>	involves: 129S/SvEv * C57BL/6	MGI:3639302	hm	enhanced long term potentiation
Grik1<tm1Sfh>/Grik1<tm1Sfh>	involves: 129S/SvEv * C57BL/6	MGI:3639302	hm	increased chemical nociceptive threshold
Hoxd1<tm1Ddu>/Hoxd1<tm1Ddu>	involves: 129S2/SvPas	MGI:3616022	hm	abnormal cervical atlas morphology
Hoxd1<tm1Ddu>/Hoxd1<tm1Ddu>	involves: 129S2/SvPas	MGI:3616022	hm	abnormal cervical vertebrae morphology
Hoxd1<tm1Ddu>/Hoxd1<tm1Ddu>	involves: 129S2/SvPas	MGI:3616022	hm	absent arcus anterior
Hoxd1<tm1Ddu>/Hoxd1<tm1Ddu>	involves: 129S2/SvPas	MGI:3616022	hm	absent odontoid process
Hoxd1<tm1Ddu>/Hoxd1<tm1Ddu>	involves: 129S2/SvPas	MGI:3616022	hm	cervical vertebral fusion
Hoxd1<tm1Ddu>/Hoxd1<tm1Ddu>	involves: 129S2/SvPas	MGI:3616022	hm	fusion of atlas and occipital bones
Hoxd1<tm1Mrc>/Hoxd1<tm1Mrc>	involves: 129/Sv	MGI:4947861	hm	abnormal nociception after inflammation
Hoxd1<tm1Mrc>/Hoxd1<tm1Mrc>	involves: 129/Sv	MGI:4947861	hm	abnormal sensory neuron innervation pattern
Hoxd1<tm1Mrc>/Hoxd1<tm1Mrc>	involves: 129/Sv	MGI:4947861	hm	increased thermal nociceptive threshold
Htr3a<tm1Jul>/Htr3a<tm1Jul>	either: (involves: 129X1/SvJ * C57BL/6J) or (involves: 129X1/SvJ * C57BL/6J * DBA/2)	MGI:3055226	hm	increased chemical nociceptive threshold
Isl2<tm1Gan>/Isl2<tm1Gan>	Not Specified	MGI:3797816	hm	no abnormal phenotype detected
Isl2<tm2Slp>/Isl2<tm2Slp>	involves: 129S1/Sv	MGI:3046280	hm	abnormal innervation
Isl2<tm2Slp>/Isl2<tm2Slp>	involves: 129S1/Sv	MGI:3046280	hm	abnormal motor neuron morphology
Isl2<tm2Slp>/Isl2<tm2Slp>	involves: 129S1/Sv	MGI:3046280	hm	abnormal neuron specification
Isl2<tm2Slp>/Isl2<tm2Slp>	involves: 129S1/Sv	MGI:3046280	hm	complete neonatal lethality
Isl2<tm2Slp>/Isl2<tm2Slp>	involves: 129S1/Sv	MGI:3046280	hm	distended abdomen
L1cam<tm1.1Vlem>/L1cam<tm1.1Vlem>	129.Cg-L1cam<tm1.1Vlem>	MGI:3041396	hm	nervous system phenotype
L1cam<tm1.1Vlem>/L1cam<tm1.1Vlem>	129.Cg-L1cam<tm1.1Vlem>	MGI:3041396	hm	partial prenatal lethality
L1cam<tm1.1Vlem>/L1cam<tm1.1Vlem>	B6.Cg-L1cam<tm1.1Vlem>	MGI:3041398	hm	complete postnatal lethality
L1cam<tm1.1Vlem>/L1cam<tm1.1Vlem>	B6.Cg-L1cam<tm1.1Vlem>	MGI:3041398	hm	hydroencephaly
L1cam<tm1.1Vlem>/L1cam<tm1.1Vlem>	B6.Cg-L1cam<tm1.1Vlem>	MGI:3041398	hm	partial prenatal lethality
Lpar3<tm1Jch>/Lpar3<tm1Jch>	involves: 129S1/Sv * 129X1/SvJ * C57BL/6	MGI:3579500	hm	abnormal placenta morphology
Lpar3<tm1Jch>/Lpar3<tm1Jch>	involves: 129S1/Sv * 129X1/SvJ * C57BL/6	MGI:3579500	hm	decreased litter size
Lpar3<tm1Jch>/Lpar3<tm1Jch>	involves: 129S1/Sv * 129X1/SvJ * C57BL/6	MGI:3579500	hm	decreased prostaglandin level
Lpar3<tm1Jch>/Lpar3<tm1Jch>	involves: 129S1/Sv * 129X1/SvJ * C57BL/6	MGI:3579500	hm	delayed embryo implantation
Lpar3<tm1Jch>/Lpar3<tm1Jch>	involves: 129S1/Sv * 129X1/SvJ * C57BL/6	MGI:3579500	hm	impaired embryo implantation
Lpar3<tm1Jch>/Lpar3<tm1Jch>	involves: 129S1/Sv * 129X1/SvJ * C57BL/6	MGI:3579500	hm	impaired spacing of implantation sites
Lpar3<tm1Jch>/Lpar3<tm1Jch>	involves: 129S1/Sv * 129X1/SvJ * C57BL/6	MGI:3579500	hm	long gestation period
Ngfr<tm1.2Vk>/Ngfr<tm1.2Vk>	involves: 129S2/SvPas * FVB/N	MGI:5301304	hm	limb grasping
Ngfr<tm1.2Vk>/Ngfr<tm1.2Vk>	involves: 129S2/SvPas * FVB/N	MGI:5301304	hm	postnatal growth retardation
Ngfr<tm1Gdc>/Ngfr<tm1Gdc>	involves: 129X1/SvJ * C57BL/6	MGI:2450868	hm	abnormal blood vessel morphology
Ngfr<tm1Gdc>/Ngfr<tm1Gdc>	involves: 129X1/SvJ * C57BL/6	MGI:2450868	hm	abnormal gait
Ngfr<tm1Gdc>/Ngfr<tm1Gdc>	involves: 129X1/SvJ * C57BL/6	MGI:2450868	hm	abnormal L5 dorsal root ganglion morphology
Ngfr<tm1Gdc>/Ngfr<tm1Gdc>	involves: 129X1/SvJ * C57BL/6	MGI:2450868	hm	abnormal posture
Ngfr<tm1Gdc>/Ngfr<tm1Gdc>	involves: 129X1/SvJ * C57BL/6	MGI:2450868	hm	abnormal sciatic nerve morphology
Ngfr<tm1Gdc>/Ngfr<tm1Gdc>	involves: 129X1/SvJ * C57BL/6	MGI:2450868	hm	ataxia
Ngfr<tm1Gdc>/Ngfr<tm1Gdc>	involves: 129X1/SvJ * C57BL/6	MGI:2450868	hm	decreased body size
Ngfr<tm1Gdc>/Ngfr<tm1Gdc>	involves: 129X1/SvJ * C57BL/6	MGI:2450868	hm	decreased Schwann cell number
Ngfr<tm1Gdc>/Ngfr<tm1Gdc>	involves: 129X1/SvJ * C57BL/6	MGI:2450868	hm	dilated dorsal aorta
Ngfr<tm1Gdc>/Ngfr<tm1Gdc>	involves: 129X1/SvJ * C57BL/6	MGI:2450868	hm	hemorrhage
Ngfr<tm1Gdc>/Ngfr<tm1Gdc>	involves: 129X1/SvJ * C57BL/6	MGI:2450868	hm	partial perinatal lethality
Ngfr<tm1Jae>/Ngfr<tm1Jae>	B6.129S4-Ngfr<tm1Jae>	MGI:3044432	hm	abnormal axon extension
Ngfr<tm1Jae>/Ngfr<tm1Jae>	B6.129S4-Ngfr<tm1Jae>	MGI:3044432	hm	abnormal circumvallate papillae morphology
Ngfr<tm1Jae>/Ngfr<tm1Jae>	B6.129S4-Ngfr<tm1Jae>	MGI:3044432	hm	abnormal gustatory papillae taste bud morphology
Ngfr<tm1Jae>/Ngfr<tm1Jae>	B6.129S4-Ngfr<tm1Jae>	MGI:3044432	hm	abnormal innervation pattern to muscle
Ngfr<tm1Jae>/Ngfr<tm1Jae>	B6.129S4-Ngfr<tm1Jae>	MGI:3044432	hm	abnormal Kupffer cell morphology
Ngfr<tm1Jae>/Ngfr<tm1Jae>	B6.129S4-Ngfr<tm1Jae>	MGI:3044432	hm	abnormal neuron differentiation
Ngfr<tm1Jae>/Ngfr<tm1Jae>	B6.129S4-Ngfr<tm1Jae>	MGI:3044432	hm	abnormal neuron morphology
Ngfr<tm1Jae>/Ngfr<tm1Jae>	B6.129S4-Ngfr<tm1Jae>	MGI:3044432	hm	abnormal sensory neuron innervation pattern
Ngfr<tm1Jae>/Ngfr<tm1Jae>	B6.129S4-Ngfr<tm1Jae>	MGI:3044432	hm	abnormal tongue epithelium morphology
Ngfr<tm1Jae>/Ngfr<tm1Jae>	B6.129S4-Ngfr<tm1Jae>	MGI:3044432	hm	abnormal vascular wound healing
Ngfr<tm1Jae>/Ngfr<tm1Jae>	B6.129S4-Ngfr<tm1Jae>	MGI:3044432	hm	increased neuron number
Ngfr<tm1Jae>/Ngfr<tm1Jae>	B6.129S4-Ngfr<tm1Jae>	MGI:3044432	hm	increased retinal photoreceptor cell number
Ngfr<tm1Jae>/Ngfr<tm1Jae>	B6.129S4-Ngfr<tm1Jae>	MGI:3044432	hm	increased susceptibility to experimental autoimmune encephalomyelitis
Ngfr<tm1Jae>/Ngfr<tm1Jae>	B6.129S4-Ngfr<tm1Jae>/J	MGI:3702322	hm	cochlear ganglion degeneration
Ngfr<tm1Jae>/Ngfr<tm1Jae>	B6.129S4-Ngfr<tm1Jae>/J	MGI:3702322	hm	cochlear hair cell degeneration
Ngfr<tm1Jae>/Ngfr<tm1Jae>	B6.129S4-Ngfr<tm1Jae>/J	MGI:3702322	hm	decreased myocardial infarction size
Ngfr<tm1Jae>/Ngfr<tm1Jae>	B6.129S4-Ngfr<tm1Jae>/J	MGI:3702322	hm	increased or absent threshold for auditory brainstem response
Ngfr<tm1Jae>/Ngfr<tm1Jae>	B6.129S4-Ngfr<tm1Jae>/J	MGI:3702322	hm	increased susceptibility to age-related hearing loss
Ngfr<tm1Jae>/Ngfr<tm1Jae>	B6.129S4-Ngfr<tm1Jae>/J	MGI:3702322	hm	organ of Corti degeneration
Ngfr<tm1Jae>/Ngfr<tm1Jae>	B6.129S4-Ngfr<tm1Jae>/J	MGI:3702322	hm	sensorineural hearing loss
Ngfr<tm1Jae>/Ngfr<tm1Jae>	C;129S-Ngfr<tm1Jae>/J	MGI:2175146	hm	abnormal neuron apoptosis
Ngfr<tm1Jae>/Ngfr<tm1Jae>	involves: 129 * BALB/c	MGI:3531406	hm	abnormal axon extension
Ngfr<tm1Jae>/Ngfr<tm1Jae>	involves: 129S1/Sv * 129S4/SvJae	MGI:3835511	hm	abnormal retinal ganglion cell morphology
Ngfr<tm1Jae>/Ngfr<tm1Jae>	involves: 129S1/Sv * 129S4/SvJae	MGI:3835511	hm	abnormal superior colliculus morphology
Ngfr<tm1Jae>/Ngfr<tm1Jae>	involves: 129S4/SvJae	MGI:3770685	hm	abnormal axon guidance
Ngfr<tm1Jae>/Ngfr<tm1Jae>	involves: 129S4/SvJae	MGI:3770685	hm	abnormal cholinergic neuron morphology
Ngfr<tm1Jae>/Ngfr<tm1Jae>	involves: 129S4/SvJae	MGI:3770685	hm	abnormal eye physiology
Ngfr<tm1Jae>/Ngfr<tm1Jae>	involves: 129S4/SvJae	MGI:3770685	hm	abnormal retinal ganglion cell morphology
Ngfr<tm1Jae>/Ngfr<tm1Jae>	involves: 129S4/SvJae	MGI:3770685	hm	abnormal sensory neuron innervation pattern
Ngfr<tm1Jae>/Ngfr<tm1Jae>	involves: 129S4/SvJae	MGI:3770685	hm	abnormal spatial learning
Ngfr<tm1Jae>/Ngfr<tm1Jae>	involves: 129S4/SvJae	MGI:3770685	hm	abnormal superior colliculus morphology
Ngfr<tm1Jae>/Ngfr<tm1Jae>	involves: 129S4/SvJae	MGI:3770685	hm	abnormal trigeminal ganglion morphology
Ngfr<tm1Jae>/Ngfr<tm1Jae>	involves: 129S4/SvJae	MGI:3770685	hm	abnormal tumor necrosis factor level
Ngfr<tm1Jae>/Ngfr<tm1Jae>	involves: 129S4/SvJae	MGI:3770685	hm	decreased neuron apoptosis
Ngfr<tm1Jae>/Ngfr<tm1Jae>	involves: 129S4/SvJae * BALB/c	MGI:3770677	hm	abnormal dorsal root ganglion morphology
Ngfr<tm1Jae>/Ngfr<tm1Jae>	involves: 129S4/SvJae * BALB/c	MGI:3770677	hm	abnormal molar crown morphology
Ngfr<tm1Jae>/Ngfr<tm1Jae>	involves: 129S4/SvJae * BALB/c	MGI:3770677	hm	abnormal molar morphology
Ngfr<tm1Jae>/Ngfr<tm1Jae>	involves: 129S4/SvJae * BALB/c	MGI:3770677	hm	abnormal mouth morphology
Ngfr<tm1Jae>/Ngfr<tm1Jae>	involves: 129S4/SvJae * BALB/c	MGI:3770677	hm	abnormal muscle morphology
Ngfr<tm1Jae>/Ngfr<tm1Jae>	involves: 129S4/SvJae * BALB/c	MGI:3770677	hm	abnormal proprioceptive neuron morphology
Ngfr<tm1Jae>/Ngfr<tm1Jae>	involves: 129S4/SvJae * BALB/c	MGI:3770677	hm	abnormal sensory capabilities/reflexes/nociception
Ngfr<tm1Jae>/Ngfr<tm1Jae>	involves: 129S4/SvJae * BALB/c	MGI:3770677	hm	abnormal sensory neuron innervation pattern
Ngfr<tm1Jae>/Ngfr<tm1Jae>	involves: 129S4/SvJae * BALB/c	MGI:3770677	hm	abnormal tooth morphology
Ngfr<tm1Jae>/Ngfr<tm1Jae>	involves: 129S4/SvJae * BALB/c	MGI:3770677	hm	absent hair follicles
Ngfr<tm1Jae>/Ngfr<tm1Jae>	involves: 129S4/SvJae * BALB/c	MGI:3770677	hm	decreased muscle spindle number
Ngfr<tm1Jae>/Ngfr<tm1Jae>	involves: 129S4/SvJae * BALB/c	MGI:3770677	hm	extremity edema
Ngfr<tm1Jae>/Ngfr<tm1Jae>	involves: 129S4/SvJae * BALB/c	MGI:3770677	hm	renal/urinary system phenotype
Ngfr<tm1Jae>/Ngfr<tm1Jae>	involves: 129S4/SvJae * BALB/c	MGI:3770677	hm	small L4 dorsal root ganglion
Ngfr<tm1Jae>/Ngfr<tm1Jae>	involves: 129S4/SvJae * BALB/c	MGI:3770677	hm	ulcerated paws
Ngfr<tm1Jae>/Ngfr<tm1Jae>	involves: 129S4/SvJae * C57BL/6	MGI:3809496	hm	abnormal axon extension
Ngfr<tm1Jae>/Ngfr<tm1Jae>	involves: 129S4/SvJae * C57BL/6	MGI:3809496	hm	abnormal axon pruning
Ngfr<tm1Jae>/Ngfr<tm1Jae>	involves: 129S4/SvJae * C57BL/6J	MGI:3719110	hm	abnormal peripheral nervous system regeneration
Ngfr<tm1Jae>/Ngfr<tm1Jae>	involves: 129S4/SvJae * C57BL/6J	MGI:3719110	hm	decreased motor neuron number
Ntrk1<tm1Apat>/Ntrk1<tm1Apat>	involves: 129S1/Sv	MGI:3052172	hm	decreased sensory neuron number
Ntrk1<tm1Bbd>/Ntrk1<tm1Bbd>	involves: 129S2/SvPas	MGI:2175185	hm	abnormal cholinergic neuron morphology
Ntrk1<tm1Bbd>/Ntrk1<tm1Bbd>	involves: 129S2/SvPas	MGI:2175185	hm	abnormal digit morphology
Ntrk1<tm1Bbd>/Ntrk1<tm1Bbd>	involves: 129S2/SvPas	MGI:2175185	hm	abnormal sympathetic ganglion morphology
Ntrk1<tm1Bbd>/Ntrk1<tm1Bbd>	involves: 129S2/SvPas	MGI:2175185	hm	abnormal sympathetic nervous system physiology
Ntrk1<tm1Bbd>/Ntrk1<tm1Bbd>	involves: 129S2/SvPas	MGI:2175185	hm	abnormal vibrissae reflex
Ntrk1<tm1Bbd>/Ntrk1<tm1Bbd>	involves: 129S2/SvPas	MGI:2175185	hm	blepharoptosis
Ntrk1<tm1Bbd>/Ntrk1<tm1Bbd>	involves: 129S2/SvPas	MGI:2175185	hm	corneal opacity
Ntrk1<tm1Bbd>/Ntrk1<tm1Bbd>	involves: 129S2/SvPas	MGI:2175185	hm	decreased body size
Ntrk1<tm1Bbd>/Ntrk1<tm1Bbd>	involves: 129S2/SvPas	MGI:2175185	hm	increased thermal nociceptive threshold
Ntrk1<tm1Bbd>/Ntrk1<tm1Bbd>	involves: 129S2/SvPas	MGI:2175185	hm	Insensitivity to Pain, Congenital, with Anhidrosis
Ntrk1<tm1Bbd>/Ntrk1<tm1Bbd>	involves: 129S2/SvPas	MGI:2175185	hm	miotic pupils
Ntrk1<tm1Bbd>/Ntrk1<tm1Bbd>	involves: 129S2/SvPas	MGI:2175185	hm	mottled coat
Ntrk1<tm1Bbd>/Ntrk1<tm1Bbd>	involves: 129S2/SvPas	MGI:2175185	hm	partial postnatal lethality
Ntrk1<tm1Bbd>/Ntrk1<tm1Bbd>	involves: 129S2/SvPas	MGI:2175185	hm	premature death
Ntrk1<tm1Bbd>/Ntrk1<tm1Bbd>	involves: 129S2/SvPas	MGI:2175185	hm	skin lesions
Ntrk1<tm1Bbd>/Ntrk1<tm1Bbd>	involves: 129S2/SvPas	MGI:2175185	hm	small dorsal root ganglion
Ntrk1<tm1Bbd>/Ntrk1<tm1Bbd>	involves: 129S2/SvPas	MGI:2175185	hm	small superior cervical ganglion
Ntrk1<tm1Bbd>/Ntrk1<tm1Bbd>	involves: 129S2/SvPas	MGI:2175185	hm	small trigeminal ganglion
Ntrk1<tm1Bbd>/Ntrk1<tm1Bbd>	involves: 129S2/SvPas	MGI:2175185	hm	ulcerated paws
Ntrk1<tm1Bbd>/Ntrk1<tm1Bbd>	involves: 129S2/SvPas	MGI:2175185	hm	unresponsive to tactile stimuli
Ntrk1<tm1Bbd>/Ntrk1<tm1Bbd>	involves: 129S2/SvPas * C57BL/6	MGI:3704860	hm	hearing/vestibular/ear phenotype
Ntrk1<tm1Par>/Ntrk1<tm1Par>	involves: 129S1/Sv * C57BL/6	MGI:2175186	hm	decreased sensory neuron number
Ntrk1<tm1Par>/Ntrk1<tm1Par>	involves: 129S1/Sv * C57BL/6	MGI:2175186	hm	Insensitivity to Pain, Congenital, with Anhidrosis
Ntrk1<tm1Par>/Ntrk1<tm1Par>	involves: 129S1/Sv * C57BL/6	MGI:2175186	hm	small dorsal root ganglion
Pcdha1<tm1Mrc>/Pcdha1<tm1Mrc>	Not Specified	MGI:3719456	hm	no abnormal phenotype detected
Pirt<tm1Xzd>/Pirt<tm1Xzd>	B6.129-Pirt1<tm1Xzd>	MGI:3834639	hm	abnormal sympathetic neuron physiology
Pirt<tm1Xzd>/Pirt<tm1Xzd>	B6.129-Pirt1<tm1Xzd>	MGI:3834639	hm	increased chemical nociceptive threshold
Pirt<tm1Xzd>/Pirt<tm1Xzd>	B6.129-Pirt1<tm1Xzd>	MGI:3834639	hm	increased thermal nociceptive threshold
Pou4f1<tm1Dsl>/Pou4f1<tm1Dsl>	either: 129X1/SvJ-Pou4f1<tm1Dsl> or (involves: 129X1/SvJ * C57BL/6J)	MGI:3618119	hm	abnormal trigeminal ganglion morphology
Pou4f1<tm1Dsl>/Pou4f1<tm1Dsl>	either: 129X1/SvJ-Pou4f1<tm1Dsl> or (involves: 129X1/SvJ * C57BL/6J)	MGI:3618119	hm	complete perinatal lethality
Pou4f1<tm1Nat>/Pou4f1<tm1Nat>	involves: 129S7/SvEvBrd * C57BL/6J	MGI:3040967	hm	abnormal cranial ganglia morphology
Pou4f1<tm1Nat>/Pou4f1<tm1Nat>	involves: 129S7/SvEvBrd * C57BL/6J	MGI:3040967	hm	abnormal epithalamus morphology
Pou4f1<tm1Nat>/Pou4f1<tm1Nat>	involves: 129S7/SvEvBrd * C57BL/6J	MGI:3040967	hm	abnormal medulla oblongata morphology
Pou4f1<tm1Nat>/Pou4f1<tm1Nat>	involves: 129S7/SvEvBrd * C57BL/6J	MGI:3040967	hm	abnormal red nucleus morphology
Pou4f1<tm1Nat>/Pou4f1<tm1Nat>	involves: 129S7/SvEvBrd * C57BL/6J	MGI:3040967	hm	abnormal trigeminal nerve morphology
Pou4f1<tm1Nat>/Pou4f1<tm1Nat>	involves: 129S7/SvEvBrd * C57BL/6J	MGI:3040967	hm	abnormal vestibular ganglion morphology
Pou4f1<tm1Nat>/Pou4f1<tm1Nat>	involves: 129S7/SvEvBrd * C57BL/6J	MGI:3040967	hm	absent gastric milk in neonates
Pou4f1<tm1Nat>/Pou4f1<tm1Nat>	involves: 129S7/SvEvBrd * C57BL/6J	MGI:3040967	hm	cochlear ganglion hypoplasia
Pou4f1<tm1Nat>/Pou4f1<tm1Nat>	involves: 129S7/SvEvBrd * C57BL/6J	MGI:3040967	hm	complete neonatal lethality
Pou4f1<tm1Nat>/Pou4f1<tm1Nat>	involves: 129S7/SvEvBrd * C57BL/6J	MGI:3040967	hm	impaired righting response
Pou4f1<tm1Nat>/Pou4f1<tm1Nat>	involves: 129S7/SvEvBrd * C57BL/6J	MGI:3040967	hm	no suckling reflex
Pou4f1<tm1Nat>/Pou4f1<tm1Nat>	involves: 129S7/SvEvBrd * C57BL/6J	MGI:3040967	hm	small geniculate ganglion
Pou4f1<tm1Nat>/Pou4f1<tm1Nat>	involves: 129S7/SvEvBrd * C57BL/6J	MGI:3040967	hm	small trigeminal ganglion
Pou4f1<tm1Rsd>/Pou4f1<tm1Rsd>	Not Specified	MGI:3512564	hm	abnormal hindbrain morphology
Pou4f1<tm1Rsd>/Pou4f1<tm1Rsd>	Not Specified	MGI:3512564	hm	abnormal inferior olivary complex morphology
Pou4f1<tm1Rsd>/Pou4f1<tm1Rsd>	Not Specified	MGI:3512564	hm	abnormal stationary movement
Pou4f1<tm1Rsd>/Pou4f1<tm1Rsd>	Not Specified	MGI:3512564	hm	absent red nucleus
Pou4f1<tm1Rsd>/Pou4f1<tm1Rsd>	Not Specified	MGI:3512564	hm	aphagia
Pou4f1<tm1Rsd>/Pou4f1<tm1Rsd>	Not Specified	MGI:3512564	hm	cochlear ganglion hypoplasia
Pou4f1<tm1Rsd>/Pou4f1<tm1Rsd>	Not Specified	MGI:3512564	hm	complete neonatal lethality
Pou4f1<tm1Rsd>/Pou4f1<tm1Rsd>	Not Specified	MGI:3512564	hm	impaired righting response
Pou4f1<tm1Rsd>/Pou4f1<tm1Rsd>	Not Specified	MGI:3512564	hm	small dorsal root ganglion
Pou4f1<tm1Rsd>/Pou4f1<tm1Rsd>	Not Specified	MGI:3512564	hm	small trigeminal ganglion
Pou4f1<tm2Dsl>/Pou4f1<tm2Dsl>	either: 129X1/SvJ-Pou4f1<tm2Dsl> or (involves: 129X1/SvJ * C57BL/6J)	MGI:3618121	hm	abnormal dorsal root ganglion morphology
Prph<tm1Jpj>/Prph<tm1Jpj>	involves: C57BL/6	MGI:3042863	hm	abnormal axon morphology
Prph<tm1Jpj>/Prph<tm1Jpj>	involves: C57BL/6	MGI:3042863	hm	abnormal sensory neuron morphology
Prph<tm1Jpj>/Prph<tm1Jpj>	involves: C57BL/6	MGI:3042863	hm	nervous system phenotype
Prrxl1<tm1And>/Prrxl1<tm1And>	involves: 129S7/SvEvBrd * C57BL/6J	MGI:3043032	hm	abnormal embryonic tissue morphology
Prrxl1<tm1And>/Prrxl1<tm1And>	involves: 129S7/SvEvBrd * C57BL/6J	MGI:3043032	hm	abnormal sensory neuron innervation pattern
Prrxl1<tm1And>/Prrxl1<tm1And>	involves: 129S7/SvEvBrd * C57BL/6J	MGI:3043032	hm	complete postnatal lethality
Prrxl1<tm1And>/Prrxl1<tm1And>	involves: 129S7/SvEvBrd * C57BL/6J	MGI:3043032	hm	decreased body weight
Prrxl1<tm1And>/Prrxl1<tm1And>	involves: 129S7/SvEvBrd * C57BL/6J * CD-1	MGI:3043034	hm	abnormal embryonic tissue morphology
Prrxl1<tm1And>/Prrxl1<tm1And>	involves: 129S7/SvEvBrd * C57BL/6J * CD-1	MGI:3043034	hm	abnormal sensory neuron innervation pattern
Prrxl1<tm1And>/Prrxl1<tm1And>	involves: 129S7/SvEvBrd * C57BL/6J * CD-1	MGI:3043034	hm	abnormal sensory neuron morphology
Prrxl1<tm1And>/Prrxl1<tm1And>	involves: 129S7/SvEvBrd * C57BL/6J * CD-1	MGI:3043034	hm	behavior/neurological phenotype
Prrxl1<tm1And>/Prrxl1<tm1And>	involves: 129S7/SvEvBrd * C57BL/6J * CD-1	MGI:3043034	hm	hyporesponsive to tactile stimuli
Prrxl1<tm1And>/Prrxl1<tm1And>	involves: 129S7/SvEvBrd * C57BL/6J * CD-1	MGI:3043034	hm	increased chemical nociceptive threshold
Prrxl1<tm1And>/Prrxl1<tm1And>	involves: 129S7/SvEvBrd * C57BL/6J * CD-1	MGI:3043034	hm	increased grooming behavior
Prrxl1<tm1And>/Prrxl1<tm1And>	involves: 129S7/SvEvBrd * C57BL/6J * CD-1	MGI:3043034	hm	increased thermal nociceptive threshold
Prrxl1<tm1And>/Prrxl1<tm1And>	involves: 129S7/SvEvBrd * C57BL/6J * CD-1	MGI:3043034	hm	premature death
Ret<tm1.1Kln>/Ret<tm1.1Kln>	involves: 129/Sv * BALB/c * C57BL/6 * CBA/J	MGI:3662905	hm	abnormal innervation pattern to muscle
Ret<tm1.2Pern>/Ret<tm1.2Pern>	involves: 129P2/OlaHsd * BALB/c * C57BL/6 * SJL	MGI:4440539	hm	abnormal kidney development
Ret<tm1.2Pern>/Ret<tm1.2Pern>	involves: 129P2/OlaHsd * BALB/c * C57BL/6 * SJL	MGI:4440539	hm	abnormal neuromuscular synapse morphology
Ret<tm1.2Pern>/Ret<tm1.2Pern>	involves: 129P2/OlaHsd * BALB/c * C57BL/6 * SJL	MGI:4440539	hm	complete perinatal lethality
Ret<tm13.1Jmi>/Ret<tm13.1Jmi>	involves: 129S1/Sv * 129X1/SvJ * FVB/N	MGI:3692550	hm	abnormal enteric neuron morphology
Ret<tm13.1Jmi>/Ret<tm13.1Jmi>	involves: 129S1/Sv * 129X1/SvJ * FVB/N	MGI:3692550	hm	absent enteric neurons
Ret<tm13.1Jmi>/Ret<tm13.1Jmi>	involves: 129S1/Sv * 129X1/SvJ * FVB/N	MGI:3692550	hm	absent kidney
Ret<tm13.1Jmi>/Ret<tm13.1Jmi>	involves: 129S1/Sv * 129X1/SvJ * FVB/N	MGI:3692550	hm	nervous system phenotype
Ret<tm1Cos>/Ret<tm1Cos>	involves: 129S/Sv * C57BL/6	MGI:4820806	hm	abnormal enteric ganglia morphology
Ret<tm1Cos>/Ret<tm1Cos>	involves: 129S/Sv * C57BL/6	MGI:4820806	hm	abnormal enteric nervous system morphology
Ret<tm1Cos>/Ret<tm1Cos>	involves: 129S/Sv * C57BL/6	MGI:4820806	hm	absent kidney
Ret<tm1Cos>/Ret<tm1Cos>	involves: 129S/Sv * C57BL/6	MGI:4820806	hm	Hirschsprung Disease, Susceptibility to, 1
Ret<tm1Cos>/Ret<tm1Cos>	involves: 129S/SvEv	MGI:5604497	hm	endocrine/exocrine gland phenotype
Ret<tm1Cos>/Ret<tm1Cos>	involves: 129S/SvEv * MF1	MGI:2175009	hm	abnormal branching involved in ureteric bud morphogenesis
Ret<tm1Cos>/Ret<tm1Cos>	involves: 129S/SvEv * MF1	MGI:2175009	hm	abnormal cardiac ganglion morphology
Ret<tm1Cos>/Ret<tm1Cos>	involves: 129S/SvEv * MF1	MGI:2175009	hm	abnormal enteric neural crest cell migration
Ret<tm1Cos>/Ret<tm1Cos>	involves: 129S/SvEv * MF1	MGI:2175009	hm	abnormal kidney collecting duct morphology
Ret<tm1Cos>/Ret<tm1Cos>	involves: 129S/SvEv * MF1	MGI:2175009	hm	abnormal kidney mesenchyme morphology
Ret<tm1Cos>/Ret<tm1Cos>	involves: 129S/SvEv * MF1	MGI:2175009	hm	abnormal kidney morphology
Ret<tm1Cos>/Ret<tm1Cos>	involves: 129S/SvEv * MF1	MGI:2175009	hm	abnormal lung development
Ret<tm1Cos>/Ret<tm1Cos>	involves: 129S/SvEv * MF1	MGI:2175009	hm	abnormal mesonephros morphology
Ret<tm1Cos>/Ret<tm1Cos>	involves: 129S/SvEv * MF1	MGI:2175009	hm	abnormal metanephric mesenchyme morphology
Ret<tm1Cos>/Ret<tm1Cos>	involves: 129S/SvEv * MF1	MGI:2175009	hm	abnormal parasympathetic postganglionic fiber morphology
Ret<tm1Cos>/Ret<tm1Cos>	involves: 129S/SvEv * MF1	MGI:2175009	hm	abnormal stellate ganglion morphology
Ret<tm1Cos>/Ret<tm1Cos>	involves: 129S/SvEv * MF1	MGI:2175009	hm	abnormal ureter development
Ret<tm1Cos>/Ret<tm1Cos>	involves: 129S/SvEv * MF1	MGI:2175009	hm	abnormal ureteric bud elongation
Ret<tm1Cos>/Ret<tm1Cos>	involves: 129S/SvEv * MF1	MGI:2175009	hm	abnormal ureteric bud invasion
Ret<tm1Cos>/Ret<tm1Cos>	involves: 129S/SvEv * MF1	MGI:2175009	hm	abnormal ureter morphology
Ret<tm1Cos>/Ret<tm1Cos>	involves: 129S/SvEv * MF1	MGI:2175009	hm	absent enteric neurons
Ret<tm1Cos>/Ret<tm1Cos>	involves: 129S/SvEv * MF1	MGI:2175009	hm	absent kidney
Ret<tm1Cos>/Ret<tm1Cos>	involves: 129S/SvEv * MF1	MGI:2175009	hm	absent nephrogenic zone
Ret<tm1Cos>/Ret<tm1Cos>	involves: 129S/SvEv * MF1	MGI:2175009	hm	absent superior cervical ganglion
Ret<tm1Cos>/Ret<tm1Cos>	involves: 129S/SvEv * MF1	MGI:2175009	hm	absent ureter
Ret<tm1Cos>/Ret<tm1Cos>	involves: 129S/SvEv * MF1	MGI:2175009	hm	blind ureter
Ret<tm1Cos>/Ret<tm1Cos>	involves: 129S/SvEv * MF1	MGI:2175009	hm	cardiovascular system phenotype
Ret<tm1Cos>/Ret<tm1Cos>	involves: 129S/SvEv * MF1	MGI:2175009	hm	complete neonatal lethality
Ret<tm1Cos>/Ret<tm1Cos>	involves: 129S/SvEv * MF1	MGI:2175009	hm	dilated renal glomerular capsule
Ret<tm1Cos>/Ret<tm1Cos>	involves: 129S/SvEv * MF1	MGI:2175009	hm	dilated renal tubules
Ret<tm1Cos>/Ret<tm1Cos>	involves: 129S/SvEv * MF1	MGI:2175009	hm	Hirschsprung Disease, Susceptibility to, 1
Ret<tm1Cos>/Ret<tm1Cos>	involves: 129S/SvEv * MF1	MGI:2175009	hm	increased metanephric mesenchyme apoptosis
Ret<tm1Cos>/Ret<tm1Cos>	involves: 129S/SvEv * MF1	MGI:2175009	hm	intestinal hypoperistalsis
Ret<tm1Cos>/Ret<tm1Cos>	involves: 129S/SvEv * MF1	MGI:2175009	hm	oligohydramnios
Ret<tm1Cos>/Ret<tm1Cos>	involves: 129S/SvEv * MF1	MGI:2175009	hm	small kidney
Ret<tm1Cti>/Ret<tm1Cti>	involves: 129S/SvEv * C57BL/6J	MGI:3628454	hm	abnormal enteric ganglia morphology
Ret<tm1Cti>/Ret<tm1Cti>	involves: 129S/SvEv * C57BL/6J	MGI:3628454	hm	abnormal urinary bladder morphology
Ret<tm1Cti>/Ret<tm1Cti>	involves: 129S/SvEv * C57BL/6J	MGI:3628454	hm	absent enteric neurons
Ret<tm1Cti>/Ret<tm1Cti>	involves: 129S/SvEv * C57BL/6J	MGI:3628454	hm	absent kidney
Ret<tm1Cti>/Ret<tm1Cti>	involves: 129S/SvEv * C57BL/6J	MGI:3628454	hm	complete neonatal lethality
Ret<tm1Heno>/Ret<tm1Heno>	Not Specified	MGI:3783341	hm	abnormal gastrocnemius morphology
Ret<tm1Heno>/Ret<tm1Heno>	Not Specified	MGI:3783341	hm	abnormal hypaxial muscle morphology
Ret<tm1Heno>/Ret<tm1Heno>	Not Specified	MGI:3783341	hm	abnormal motor neuron innervation pattern
Ret<tm1Heno>/Ret<tm1Heno>	Not Specified	MGI:3783341	hm	abnormal muscle spindle morphology
Ret<tm1Heno>/Ret<tm1Heno>	Not Specified	MGI:3783341	hm	decreased motor neuron number
Ret<tm1Jmi>/Ret<tm1Jmi>	involves: 129X1/SvJ	MGI:3623107	hm	abnormal innervation
Ret<tm1Jmi>/Ret<tm1Jmi>	involves: 129X1/SvJ	MGI:3623107	hm	abnormal prevertebral ganglion morphology
Ret<tm1Jmi>/Ret<tm1Jmi>	involves: 129X1/SvJ	MGI:3623107	hm	abnormal submandibular gland morphology
Ret<tm1Jmi>/Ret<tm1Jmi>	involves: 129X1/SvJ	MGI:3623107	hm	abnormal sympathetic ganglion morphology
Ret<tm1Jmi>/Ret<tm1Jmi>	involves: 129X1/SvJ	MGI:3623107	hm	abnormal sympathetic neuron morphology
Ret<tm1Jmi>/Ret<tm1Jmi>	involves: 129X1/SvJ	MGI:3623107	hm	abnormal sympathetic postganglionic fiber morphology
Ret<tm1Jmi>/Ret<tm1Jmi>	involves: 129X1/SvJ	MGI:3623107	hm	absent enteric neurons
Ret<tm1Jmi>/Ret<tm1Jmi>	involves: 129X1/SvJ	MGI:3623107	hm	absent kidney
Ret<tm1Jmi>/Ret<tm1Jmi>	involves: 129X1/SvJ	MGI:3623107	hm	complete neonatal lethality
Ret<tm1Jmi>/Ret<tm1Jmi>	involves: 129X1/SvJ	MGI:3623107	hm	increased cell proliferation
Ret<tm1Jmi>/Ret<tm1Jmi>	involves: 129X1/SvJ	MGI:3623107	hm	increased neuron apoptosis
Ret<tm1Jmi>/Ret<tm1Jmi>	involves: 129X1/SvJ	MGI:3623107	hm	small superior cervical ganglion
Ret<tm2.1Heno>/Ret<tm2.1Heno>	involves: 129S/Sv * C57BL/6 * FVB/N	MGI:4820803	hm	abnormal enteric nervous system morphology
Ret<tm2.1Heno>/Ret<tm2.1Heno>	involves: 129S/Sv * C57BL/6 * FVB/N	MGI:4820803	hm	absent kidney
Ret<tm2.1Heno>/Ret<tm2.1Heno>	involves: 129S/Sv * C57BL/6 * FVB/N	MGI:4820803	hm	Hirschsprung Disease, Susceptibility to, 1
Ret<tm2.1Heno>/Ret<tm2.1Heno>	involves: 129S/Sv * C57BL/6 * FVB/N	MGI:4820803	hm	increased neuron apoptosis
Ret<tm2.1Heno>/Ret<tm2.1Heno>	involves: C57BL/6 * FVB/N * SJL	MGI:3783340	hm	abnormal gastrocnemius morphology
Ret<tm2.1Heno>/Ret<tm2.1Heno>	involves: C57BL/6 * FVB/N * SJL	MGI:3783340	hm	abnormal hypaxial muscle morphology
Ret<tm2.1Heno>/Ret<tm2.1Heno>	involves: C57BL/6 * FVB/N * SJL	MGI:3783340	hm	abnormal motor neuron innervation pattern
Ret<tm2.1Heno>/Ret<tm2.1Heno>	involves: C57BL/6 * FVB/N * SJL	MGI:3783340	hm	abnormal muscle spindle morphology
Ret<tm2.1Heno>/Ret<tm2.1Heno>	involves: C57BL/6 * FVB/N * SJL	MGI:3783340	hm	decreased motor neuron number
Ret<tm2.1Heno>/Ret<tm2.1Heno>	involves: C57BL/6 * FVB/N * SJL	MGI:3783340	hm	muscular atrophy
Scn10a<tm1Jnw>/Scn10a<tm1Jnw>	B6.129P2-Scn10a<tm1Jnw>	MGI:2181753	hm	abnormal mechanical nociception
Scn10a<tm1Jnw>/Scn10a<tm1Jnw>	B6.129P2-Scn10a<tm1Jnw>	MGI:2181753	hm	abnormal thermal nociception
Scn10a<tm1Jnw>/Scn10a<tm1Jnw>	B6.129P2-Scn10a<tm1Jnw>	MGI:2181753	hm	hypoalgesia
Scn10a<tm1Lex>/Scn10a<tm1Lex>	involves: 129S5/SvEvBrd * C57BL/6	MGI:4430302	hm	abnormal action potential
Scn10a<tm1Lex>/Scn10a<tm1Lex>	involves: 129S5/SvEvBrd * C57BL/6	MGI:4430302	hm	abnormal pain threshold
Scn10a<tm1Lex>/Scn10a<tm1Lex>	involves: 129S5/SvEvBrd * C57BL/6	MGI:4430302	hm	hyperalgesia
Scn10a<tm1Lex>/Scn10a<tm1Lex>	involves: 129S5/SvEvBrd * C57BL/6	MGI:4430302	hm	impaired ability to fire action potentials
Scn11a<tm1Dgen>/Scn11a<tm1Dgen>	involves: 129P2/OlaHsd * C57BL/6	MGI:3606607	hm	abnormal nociception after inflammation
Scn11a<tm1Gsk>/Scn11a<tm1Gsk>	involves: 129P2/OlaHsd * C57BL/6	MGI:5609010	hm	abnormal single cell response
Scn11a<tm1Lex>/Scn11a<tm1Lex>	involves: 129S5/SvEvBrd * C57BL/6	MGI:4430303	hm	abnormal mechanical nociception
Scn11a<tm1Lex>/Scn11a<tm1Lex>	involves: 129S5/SvEvBrd * C57BL/6	MGI:4430303	hm	abnormal nociception after inflammation
Scn11a<tm1Lex>/Scn11a<tm1Lex>	involves: 129S5/SvEvBrd * C57BL/6	MGI:4430303	hm	abnormal pain threshold
Scn11a<tm1Mdba>/Scn11a<tm1Mdba>	involves: C57BL/6	MGI:3818308	hm	abnormal nervous system electrophysiology
Scn11a<tm1Mdba>/Scn11a<tm1Mdba>	Not Specified	MGI:5558030	hm	abnormal action potential
Scn11a<tm1Mdba>/Scn11a<tm1Mdba>	Not Specified	MGI:5558030	hm	abnormal nervous system electrophysiology
Scn11a<tm1Wlf>/Scn11a<tm1Wlf>	B6.Cg-Scn11a<tm1Wlf>	MGI:3696849	hm	abnormal nociception after inflammation
Scn11a<tm1Wlf>/Scn11a<tm1Wlf>	B6.Cg-Scn11a<tm1Wlf>	MGI:3696849	hm	abnormal single cell response
Scn9a<tm1.1Jnw>/Scn9a<tm1.1Jnw>	involves: 129	MGI:3053685	hm	complete neonatal lethality
Scn9a<tm1Dgen>/Scn9a<tm1Dgen>	involves: 129P2/OlaHsd * C57BL/6	MGI:3606595	hm	complete perinatal lethality
Sncg<tm1Vlb>/Sncg<tm1Vlb>	B6.129P2-Sncg<tm1Vlb>	MGI:2683143	hm	behavior/neurological phenotype
Sncg<tm1Vlb>/Sncg<tm1Vlb>	B6.129P2-Sncg<tm1Vlb>	MGI:2683143	hm	decreased dopaminergic neuron number
Sncg<tm1Vlb>/Sncg<tm1Vlb>	B6.129P2-Sncg<tm1Vlb>	MGI:2683143	hm	decreased susceptibility to dopaminergic neuron neurotoxicity
Sncg<tm1Vlb>/Sncg<tm1Vlb>	B6.129P2-Sncg<tm1Vlb>	MGI:2683143	hm	nervous system phenotype
Tlx3<tm1Sjk>/Tlx3<tm1Sjk>	involves: 129S1/Sv	MGI:3773049	hm	abnormal glutaminergic neuron morphology
Tlx3<tm1Sjk>/Tlx3<tm1Sjk>	involves: 129X1/SvJ	MGI:2669096	hm	abnormal breathing pattern
Tlx3<tm1Sjk>/Tlx3<tm1Sjk>	involves: 129X1/SvJ	MGI:2669096	hm	abnormal nervous system physiology
Tlx3<tm1Sjk>/Tlx3<tm1Sjk>	involves: 129X1/SvJ	MGI:2669096	hm	abnormal spinal cord interneuron morphology
Tlx3<tm1Sjk>/Tlx3<tm1Sjk>	involves: 129X1/SvJ	MGI:2669096	hm	absent gastric milk in neonates
Tlx3<tm1Sjk>/Tlx3<tm1Sjk>	involves: 129X1/SvJ	MGI:2669096	hm	apnea
Tlx3<tm1Sjk>/Tlx3<tm1Sjk>	involves: 129X1/SvJ	MGI:2669096	hm	Central Hypoventilation Syndrome, Congenital
Tlx3<tm1Sjk>/Tlx3<tm1Sjk>	involves: 129X1/SvJ	MGI:2669096	hm	complete neonatal lethality
Tlx3<tm1Sjk>/Tlx3<tm1Sjk>	involves: 129X1/SvJ	MGI:2669096	hm	cyanosis
Tlx3<tm1Sjk>/Tlx3<tm1Sjk>	involves: 129X1/SvJ	MGI:2669096	hm	digestive/alimentary phenotype
Tlx3<tm1Sjk>/Tlx3<tm1Sjk>	involves: 129X1/SvJ	MGI:2669096	hm	immune system phenotype
Tlx3<tm1Sjk>/Tlx3<tm1Sjk>	involves: 129X1/SvJ	MGI:2669096	hm	nervous system phenotype
Tlx3<tm1Sjk>/Tlx3<tm1Sjk>	involves: 129X1/SvJ	MGI:2669096	hm	respiratory distress
Tlx3<tm1Sjk>/Tlx3<tm1Sjk>	involves: 129X1/SvJ	MGI:2669096	hm	respiratory failure
Tlx3<tm1Sjk>/Tlx3<tm1Sjk>	involves: 129X1/SvJ	MGI:2669096	hm	tachypnea
Trpa1<tm1.1Kykw>/Trpa1<tm1.1Kykw>	involves: 129P2/OlaHsd * C57BL/6J	MGI:5544081	hm	no phenotypic analysis
Trpa1<tm1Jul>/Trpa1<tm1Jul>	involves: 129P2/OlaHsd * C57BL/6	MGI:3696956	hm	abnormal nervous system physiology
Trpa1<tm1Kykw>/Trpa1<tm1Kykw>	involves: 129P2/OlaHsd * C57BL/6J	MGI:3625358	hm	abnormal taste sensitivity
Trpa1<tm1Kykw>/Trpa1<tm1Kykw>	involves: 129P2/OlaHsd * C57BL/6J	MGI:3625358	hm	abnormal thermosensation
Trpa1<tm1Kykw>/Trpa1<tm1Kykw>	involves: 129P2/OlaHsd * C57BL/6J	MGI:3625358	hm	decreased threshold for auditory brainstem response
Trpa1<tm1Kykw>/Trpa1<tm1Kykw>	involves: 129P2/OlaHsd * C57BL/6J	MGI:3625358	hm	hyporesponsive to tactile stimuli
Trpa1<tm1Kykw>/Trpa1<tm1Kykw>	involves: 129P2/OlaHsd * C57BL/6J	MGI:3625358	hm	increased thermal nociceptive threshold
Trpa1<tm2.1Kykw>/Trpa1<tm2.1Kykw>	involves: 129S6/SvEvTac	MGI:5298033	hm	hypoalgesia
Trpv1<tm1Jbd>/Trpv1<tm1Jbd>	involves: 129P2/OlaHsd	MGI:4458087	hm	abnormal sensory neuron physiology
Trpv1<tm1Jbd>/Trpv1<tm1Jbd>	involves: 129P2/OlaHsd * C57BL/6J	MGI:3029187	hm	abnormal nervous system electrophysiology
Trpv1<tm1Jbd>/Trpv1<tm1Jbd>	involves: 129P2/OlaHsd * C57BL/6J	MGI:3029187	hm	abnormal nociception after inflammation
Trpv1<tm1Jbd>/Trpv1<tm1Jbd>	involves: 129P2/OlaHsd * C57BL/6J	MGI:3029187	hm	abnormal thermal nociception
Trpv1<tm1Jul>/Trpv1<tm1Jul>	B6.129X1-Trpv1<tm1Jul>	MGI:4418196	hm	abnormal behavior
Trpv1<tm1Jul>/Trpv1<tm1Jul>	B6.129X1-Trpv1<tm1Jul>	MGI:4418196	hm	abnormal chemokine secretion
Trpv1<tm1Jul>/Trpv1<tm1Jul>	B6.129X1-Trpv1<tm1Jul>	MGI:4418196	hm	abnormal renal tubule morphology
Trpv1<tm1Jul>/Trpv1<tm1Jul>	B6.129X1-Trpv1<tm1Jul>	MGI:4418196	hm	abnormal urine homeostasis
Trpv1<tm1Jul>/Trpv1<tm1Jul>	B6.129X1-Trpv1<tm1Jul>	MGI:4418196	hm	behavior/neurological phenotype
Trpv1<tm1Jul>/Trpv1<tm1Jul>	B6.129X1-Trpv1<tm1Jul>	MGI:4418196	hm	decreased anxiety-related response
Trpv1<tm1Jul>/Trpv1<tm1Jul>	B6.129X1-Trpv1<tm1Jul>	MGI:4418196	hm	glomerulosclerosis
Trpv1<tm1Jul>/Trpv1<tm1Jul>	B6.129X1-Trpv1<tm1Jul>	MGI:4418196	hm	impaired contextual conditioning behavior
Trpv1<tm1Jul>/Trpv1<tm1Jul>	B6.129X1-Trpv1<tm1Jul>	MGI:4418196	hm	impaired cued conditioning behavior
Trpv1<tm1Jul>/Trpv1<tm1Jul>	B6.129X1-Trpv1<tm1Jul>	MGI:4418196	hm	increased interleukin-6 secretion
Trpv1<tm1Jul>/Trpv1<tm1Jul>	B6.129X1-Trpv1<tm1Jul>	MGI:4418196	hm	increased susceptibility to injury
Trpv1<tm1Jul>/Trpv1<tm1Jul>	B6.129X1-Trpv1<tm1Jul>	MGI:4418196	hm	increased tumor necrosis factor secretion
Trpv1<tm1Jul>/Trpv1<tm1Jul>	B6.129X1-Trpv1<tm1Jul>	MGI:4418196	hm	increased urine protein level
Trpv1<tm1Jul>/Trpv1<tm1Jul>	B6.129X1-Trpv1<tm1Jul>	MGI:4418196	hm	kidney inflammation
Trpv1<tm1Jul>/Trpv1<tm1Jul>	B6.129X1-Trpv1<tm1Jul>	MGI:4418196	hm	nervous system phenotype
Trpv1<tm1Jul>/Trpv1<tm1Jul>	B6.129X1-Trpv1<tm1Jul>	MGI:4418196	hm	reduced long term potentiation
Trpv1<tm1Jul>/Trpv1<tm1Jul>	B6.129X1-Trpv1<tm1Jul>/J	MGI:4417977	hm	abnormal action potential
Trpv1<tm1Jul>/Trpv1<tm1Jul>	B6.129X1-Trpv1<tm1Jul>/J	MGI:4417977	hm	abnormal hair cycle
Trpv1<tm1Jul>/Trpv1<tm1Jul>	B6.129X1-Trpv1<tm1Jul>/J	MGI:4417977	hm	abnormal hair cycle catagen phase
Trpv1<tm1Jul>/Trpv1<tm1Jul>	B6.129X1-Trpv1<tm1Jul>/J	MGI:4417977	hm	abnormal hair cycle telogen phase
Trpv1<tm1Jul>/Trpv1<tm1Jul>	B6.129X1-Trpv1<tm1Jul>/J	MGI:4417977	hm	abnormal mechanical nociception
Trpv1<tm1Jul>/Trpv1<tm1Jul>	B6.129X1-Trpv1<tm1Jul>/J	MGI:4417977	hm	abnormal nervous system electrophysiology
Trpv1<tm1Jul>/Trpv1<tm1Jul>	B6.129X1-Trpv1<tm1Jul>/J	MGI:4417977	hm	abnormal neuronal precursor proliferation
Trpv1<tm1Jul>/Trpv1<tm1Jul>	B6.129X1-Trpv1<tm1Jul>/J	MGI:4417977	hm	abnormal physiological response to xenobiotic
Trpv1<tm1Jul>/Trpv1<tm1Jul>	B6.129X1-Trpv1<tm1Jul>/J	MGI:4417977	hm	abnormal taste sensitivity
Trpv1<tm1Jul>/Trpv1<tm1Jul>	B6.129X1-Trpv1<tm1Jul>/J	MGI:4417977	hm	alcohol preference
Trpv1<tm1Jul>/Trpv1<tm1Jul>	B6.129X1-Trpv1<tm1Jul>/J	MGI:4417977	hm	altered response of heart to induced stress
Trpv1<tm1Jul>/Trpv1<tm1Jul>	B6.129X1-Trpv1<tm1Jul>/J	MGI:4417977	hm	altered righting response
Trpv1<tm1Jul>/Trpv1<tm1Jul>	B6.129X1-Trpv1<tm1Jul>/J	MGI:4417977	hm	behavior/neurological phenotype
Trpv1<tm1Jul>/Trpv1<tm1Jul>	B6.129X1-Trpv1<tm1Jul>/J	MGI:4417977	hm	decreased left ventricle diastolic pressure
Trpv1<tm1Jul>/Trpv1<tm1Jul>	B6.129X1-Trpv1<tm1Jul>/J	MGI:4417977	hm	decreased synaptic depression
Trpv1<tm1Jul>/Trpv1<tm1Jul>	B6.129X1-Trpv1<tm1Jul>/J	MGI:4417977	hm	impaired ability to fire action potentials
Trpv1<tm1Jul>/Trpv1<tm1Jul>	B6.129X1-Trpv1<tm1Jul>/J	MGI:4417977	hm	impaired behavioral response to alcohol
Trpv1<tm1Jul>/Trpv1<tm1Jul>	B6.129X1-Trpv1<tm1Jul>/J	MGI:4417977	hm	impaired coordination
Trpv1<tm1Jul>/Trpv1<tm1Jul>	B6.129X1-Trpv1<tm1Jul>/J	MGI:4417977	hm	increased alcohol consumption
Trpv1<tm1Jul>/Trpv1<tm1Jul>	B6.129X1-Trpv1<tm1Jul>/J	MGI:4417977	hm	increased blood osmolality
Trpv1<tm1Jul>/Trpv1<tm1Jul>	B6.129X1-Trpv1<tm1Jul>/J	MGI:4417977	hm	increased body weight
Trpv1<tm1Jul>/Trpv1<tm1Jul>	B6.129X1-Trpv1<tm1Jul>/J	MGI:4417977	hm	increased coronary flow rate
Trpv1<tm1Jul>/Trpv1<tm1Jul>	B6.129X1-Trpv1<tm1Jul>/J	MGI:4417977	hm	increased left ventricle developed pressure
Trpv1<tm1Jul>/Trpv1<tm1Jul>	B6.129X1-Trpv1<tm1Jul>/J	MGI:4417977	hm	increased thermal nociceptive threshold
Trpv1<tm1Jul>/Trpv1<tm1Jul>	B6.129X1-Trpv1<tm1Jul>/J	MGI:4417977	hm	reduced long term depression
Trpv1<tm1Jul>/Trpv1<tm1Jul>	involves: 129X1/SvJ	MGI:2655322	hm	abnormal adaptive thermogenesis
Trpv1<tm1Jul>/Trpv1<tm1Jul>	involves: 129X1/SvJ	MGI:2655322	hm	abnormal nervous system electrophysiology
Trpv1<tm1Jul>/Trpv1<tm1Jul>	involves: 129X1/SvJ	MGI:2655322	hm	abnormal nociception after inflammation
Trpv1<tm1Jul>/Trpv1<tm1Jul>	involves: 129X1/SvJ	MGI:2655322	hm	abnormal sensory neuron physiology
Trpv1<tm1Jul>/Trpv1<tm1Jul>	involves: 129X1/SvJ	MGI:2655322	hm	decreased abdominal fat pad weight
Trpv1<tm1Jul>/Trpv1<tm1Jul>	involves: 129X1/SvJ	MGI:2655322	hm	decreased fat cell size
Trpv1<tm1Jul>/Trpv1<tm1Jul>	involves: 129X1/SvJ	MGI:2655322	hm	decreased fluid intake
Trpv1<tm1Jul>/Trpv1<tm1Jul>	involves: 129X1/SvJ	MGI:2655322	hm	decreased subcutaneous adipose tissue amount
Trpv1<tm1Jul>/Trpv1<tm1Jul>	involves: 129X1/SvJ	MGI:2655322	hm	decreased susceptibility to diet-induced obesity
Trpv1<tm1Jul>/Trpv1<tm1Jul>	involves: 129X1/SvJ	MGI:2655322	hm	decreased susceptibility to hepatic steatosis
Trpv1<tm1Jul>/Trpv1<tm1Jul>	involves: 129X1/SvJ	MGI:2655322	hm	hypoalgesia
Trpv1<tm1Jul>/Trpv1<tm1Jul>	involves: 129X1/SvJ	MGI:2655322	hm	impaired ability to fire action potentials
Trpv1<tm1Jul>/Trpv1<tm1Jul>	involves: 129X1/SvJ	MGI:2655322	hm	increased chemical nociceptive threshold
Trpv1<tm1Jul>/Trpv1<tm1Jul>	involves: 129X1/SvJ	MGI:2655322	hm	increased thermal nociceptive threshold
Trpv1<tm1Jul>/Trpv1<tm1Jul>	involves: 129X1/SvJ * C57BL/6	MGI:3834761	hm	abnormal urination
Trpv1<tm1Jul>/Trpv1<tm1Jul>	involves: 129X1/SvJ * C57BL/6	MGI:3834761	hm	decreased susceptibility to endotoxin shock
Trpv1<tm1Jul>/Trpv1<tm1Jul>	involves: 129X1/SvJ * C57BL/6	MGI:3834761	hm	homeostasis/metabolism phenotype
Trpv1<tm1Jul>/Trpv1<tm1Jul>	involves: 129X1/SvJ * C57BL/6	MGI:3834761	hm	impaired febrile response
Trpv1<tm1Jul>/Trpv1<tm1Jul>	involves: 129X1/SvJ * C57BL/6	MGI:3834761	hm	increased incidence of tumors by chemical induction
Ttl<tm1Wehl>/Ttl<tm1Wehl>	either: (involves: 129S1/Sv * 129X1/SvJ) or (involves: 129S1/Sv * 129X1/SvJ * BALB/c)	MGI:3603825	hm	abnormal breathing pattern
Ttl<tm1Wehl>/Ttl<tm1Wehl>	either: (involves: 129S1/Sv * 129X1/SvJ) or (involves: 129S1/Sv * 129X1/SvJ * BALB/c)	MGI:3603825	hm	abnormal forebrain development
Ttl<tm1Wehl>/Ttl<tm1Wehl>	either: (involves: 129S1/Sv * 129X1/SvJ) or (involves: 129S1/Sv * 129X1/SvJ * BALB/c)	MGI:3603825	hm	abnormal neuron differentiation
Ttl<tm1Wehl>/Ttl<tm1Wehl>	either: (involves: 129S1/Sv * 129X1/SvJ) or (involves: 129S1/Sv * 129X1/SvJ * BALB/c)	MGI:3603825	hm	abnormal stratification in cerebral cortex
Ttl<tm1Wehl>/Ttl<tm1Wehl>	either: (involves: 129S1/Sv * 129X1/SvJ) or (involves: 129S1/Sv * 129X1/SvJ * BALB/c)	MGI:3603825	hm	abnormal telencephalon development
Ttl<tm1Wehl>/Ttl<tm1Wehl>	either: (involves: 129S1/Sv * 129X1/SvJ) or (involves: 129S1/Sv * 129X1/SvJ * BALB/c)	MGI:3603825	hm	absent brain internal capsule
Ttl<tm1Wehl>/Ttl<tm1Wehl>	either: (involves: 129S1/Sv * 129X1/SvJ) or (involves: 129S1/Sv * 129X1/SvJ * BALB/c)	MGI:3603825	hm	ataxia
Ttl<tm1Wehl>/Ttl<tm1Wehl>	either: (involves: 129S1/Sv * 129X1/SvJ) or (involves: 129S1/Sv * 129X1/SvJ * BALB/c)	MGI:3603825	hm	complete neonatal lethality

## Sheet: 30_Neuronal general
Genotype symbol	Genotype Background	Genotype Primary Identifier	Genotype Zygosity	Ontology Annotation						MP term	p-value (Bonferroni 0.05)	Genotype	MP Ontology Term
Actl6b<tm1Grc>/Actl6b<tm1Grc>	involves: 129S6/SvEvTac * C57BL/6	MGI:3783724	hm	abnormal dendrite morphology						abnormal nervous system physiology	1.20086e-17	MGI:2175756,MGI:2176810,MGI:2181757,MGI:2451032,MGI:2451314,MGI:3036536,MGI:3527868,MGI:3588769,MGI:3589567,MGI:3607904,MGI:3612255,MGI:3620071,MGI:3713530,MGI:3719575,MGI:3719586,MGI:3719642,MGI:3721424,MGI:3775272,MGI:3775276,MGI:3783724,MGI:3784013,MGI:3830651,MGI:3845824,MGI:3847251,MGI:3849743,MGI:4360658,MGI:4414659,MGI:4431240,MGI:4437122,MGI:4442918,MGI:4452361,MGI:4833987,MGI:4834610,MGI…	MP:0003633
Actl6b<tm1Grc>/Actl6b<tm1Grc>	involves: 129S6/SvEvTac * C57BL/6	MGI:3783724	hm	abnormal myelination						abnormal synaptic transmission	9.59332e-17	MGI:2176810,MGI:2451032,MGI:2451314,MGI:3588769,MGI:3612255,MGI:3620071,MGI:3713530,MGI:3719575,MGI:3719586,MGI:3719642,MGI:3721424,MGI:3775272,MGI:3784013,MGI:3845824,MGI:3847251,MGI:4360658,MGI:4414659,MGI:4431240,MGI:4437122,MGI:4442918,MGI:4452361,MGI:4834610,MGI:4940523,MGI:5638536	MP:0003635
Actl6b<tm1Grc>/Actl6b<tm1Grc>	involves: 129S6/SvEvTac * C57BL/6	MGI:3783724	hm	decreased CNS synapse formation						abnormal CNS synaptic transmission	3.58654e-13	MGI:2176810,MGI:2451314,MGI:3588769,MGI:3612255,MGI:3713530,MGI:3719575,MGI:3719586,MGI:3719642,MGI:3721424,MGI:3784013,MGI:3845824,MGI:3847251,MGI:4360658,MGI:4414659,MGI:4431240,MGI:4437122,MGI:4442918,MGI:4834610,MGI:4940523,MGI:5638536	MP:0002206
Actl6b<tm1Grc>/Actl6b<tm1Grc>	involves: 129S6/SvEvTac * C57BL/6	MGI:3783724	hm	hyperactivity						nervous system phenotype	1.62101e-09	MGI:2175037,MGI:2175756,MGI:2176810,MGI:2181757,MGI:2447466,MGI:2451032,MGI:2451314,MGI:2672849,MGI:2683312,MGI:3036536,MGI:3527868,MGI:3588769,MGI:3589567,MGI:3607904,MGI:3612255,MGI:3620071,MGI:3713530,MGI:3716311,MGI:3716312,MGI:3719575,MGI:3719586,MGI:3719642,MGI:3721424,MGI:3775272,MGI:3775276,MGI:3783724,MGI:3784013,MGI:3830651,MGI:3845824,MGI:3847251,MGI:3849743,MGI:4360658,MGI:4414659,MGI…	MP:0003631
Actl6b<tm1Grc>/Actl6b<tm1Grc>	involves: 129S6/SvEvTac * C57BL/6	MGI:3783724	hm	partial postnatal lethality						abnormal glutamate-mediated receptor currents	4.52043e-06	MGI:2451314,MGI:3588769,MGI:3612255,MGI:3847251,MGI:4360658,MGI:4437122,MGI:4834610	MP:0002886
Arhgap33<tm1.1Wbm>/Arhgap33<tm1.1Wbm>	Not Specified	MGI:5431234	hm	abnormal auditory cortex morphology						abnormal AMPA-mediated synaptic currents	0.00895271	MGI:3588769,MGI:3612255,MGI:4360658,MGI:4834610	MP:0002885
Arhgap33<tm1.1Wbm>/Arhgap33<tm1.1Wbm>	Not Specified	MGI:5431234	hm	abnormal cerebral cortex morphology						abnormal locomotor activation	0.0125339	MGI:2175037,MGI:2679652,MGI:3036536,MGI:3050800,MGI:3607904,MGI:3612255,MGI:3713530,MGI:3721424,MGI:3783724,MGI:3849743,MGI:4452361,MGI:4834610,MGI:5285873,MGI:5317116	MP:0003313
Arhgap33<tm1.1Wbm>/Arhgap33<tm1.1Wbm>	Not Specified	MGI:5431234	hm	abnormal dendrite morphology						abnormal synaptic depression	0.0218408	MGI:2451314,MGI:3719575,MGI:3845824,MGI:4360658,MGI:4442918	MP:0002915
Arhgap33<tm1.1Wbm>/Arhgap33<tm1.1Wbm>	Not Specified	MGI:5431234	hm	abnormal neocortex morphology						abnormal behavior	0.0219685	MGI:2175037,MGI:2175756,MGI:2176810,MGI:2181757,MGI:2181767,MGI:2451032,MGI:2451314,MGI:2679652,MGI:3036536,MGI:3050800,MGI:3588769,MGI:3607904,MGI:3612255,MGI:3713530,MGI:3719564,MGI:3719575,MGI:3721424,MGI:3777287,MGI:3783724,MGI:3849743,MGI:4360658,MGI:4431240,MGI:4437122,MGI:4452361,MGI:4834610,MGI:4940523,MGI:5285873,MGI:5317116,MGI:5450520	MP:0004924
Arhgap33<tm1.1Wbm>/Arhgap33<tm1.1Wbm>	Not Specified	MGI:5431234	hm	abnormal neuron morphology						behavior/neurological phenotype	0.0219685	MGI:2175037,MGI:2175756,MGI:2176810,MGI:2181757,MGI:2181767,MGI:2447466,MGI:2451032,MGI:2451314,MGI:2679652,MGI:3036536,MGI:3050800,MGI:3588769,MGI:3607904,MGI:3612255,MGI:3713530,MGI:3719564,MGI:3719575,MGI:3721424,MGI:3777287,MGI:3783724,MGI:3795130,MGI:3849743,MGI:4360658,MGI:4431240,MGI:4437122,MGI:4452361,MGI:4834610,MGI:4940523,MGI:5285873,MGI:5317116,MGI:5450520	MP:0005386
Arhgap33<tm1.1Wbm>/Arhgap33<tm1.1Wbm>	Not Specified	MGI:5431234	hm	abnormal parietal lobe morphology						abnormal emotion/affect behavior	0.0296824	MGI:2175037,MGI:2176810,MGI:2181767,MGI:2451032,MGI:2451314,MGI:2679652,MGI:3607904,MGI:4834610,MGI:4940523,MGI:5285873	MP:0002572
Arhgap33<tm1.1Wbm>/Arhgap33<tm1.1Wbm>	Not Specified	MGI:5431234	hm	abnormal somatosensory cortex morphology
Arhgap33<tm1.1Wbm>/Arhgap33<tm1.1Wbm>	Not Specified	MGI:5431234	hm	abnormal visual cortex morphology
Arhgap33<tm1.1Wbm>/Arhgap33<tm1.1Wbm>	Not Specified	MGI:5431234	hm	decreased brain size
Arhgap33<tm1.1Wbm>/Arhgap33<tm1.1Wbm>	Not Specified	MGI:5431234	hm	thin cerebral cortex
Cacna1e<tm1.1Beck>/Cacna1e<tm1.1Beck>	involves: 129P2/OlaHsd * C57BL/6	MGI:3620071	hm	decreased channel response intensity
Cacna1e<tm1.1Beck>/Cacna1e<tm1.1Beck>	involves: 129P2/OlaHsd * C57BL/6	MGI:3620071	hm	increased channel response threshold
Cacna1e<tm1.1Tsch>/Cacna1e<tm1.1Tsch>	involves: BALB/cJ * C57BL/6	MGI:3717625	hm	decreased glucagon secretion
Cacna1e<tm1.1Tsch>/Cacna1e<tm1.1Tsch>	involves: BALB/cJ * C57BL/6	MGI:3717625	hm	decreased insulin secretion
Cacna1e<tm1.1Tsch>/Cacna1e<tm1.1Tsch>	involves: BALB/cJ * C57BL/6	MGI:3717625	hm	decreased physiological sensitivity to xenobiotic
Cacna1e<tm1.1Tsch>/Cacna1e<tm1.1Tsch>	involves: BALB/cJ * C57BL/6	MGI:3717625	hm	hyperglycemia
Cacna1e<tm1.1Tsch>/Cacna1e<tm1.1Tsch>	involves: BALB/cJ * C57BL/6	MGI:3717625	hm	impaired glucose tolerance
Cacna1e<tm1.1Tsch>/Cacna1e<tm1.1Tsch>	involves: BALB/cJ * C57BL/6	MGI:3717625	hm	increased body weight
Cacna1e<tm1.1Tsch>/Cacna1e<tm1.1Tsch>	involves: BALB/cJ * C57BL/6	MGI:3717625	hm	increased circulating glucose level
Cacna1e<tm1.1Tsch>/Cacna1e<tm1.1Tsch>	involves: C57BL/6	MGI:3527983	hm	abnormal glucagon secretion
Cacna1e<tm1.1Tsch>/Cacna1e<tm1.1Tsch>	involves: C57BL/6	MGI:3527983	hm	abnormal pancreatic beta cell physiology
Cacna1e<tm1.1Tsch>/Cacna1e<tm1.1Tsch>	involves: C57BL/6	MGI:3527983	hm	decreased circulating glucagon level
Cacna1e<tm1.1Tsch>/Cacna1e<tm1.1Tsch>	involves: C57BL/6	MGI:3527983	hm	decreased insulin secretion
Cacna1e<tm1.1Tsch>/Cacna1e<tm1.1Tsch>	involves: C57BL/6	MGI:3527983	hm	decreased pancreatic alpha cell number
Cacna1e<tm1.1Tsch>/Cacna1e<tm1.1Tsch>	involves: C57BL/6	MGI:3527983	hm	impaired glucose tolerance
Cacna1e<tm1.1Tsch>/Cacna1e<tm1.1Tsch>	involves: C57BL/6	MGI:3527983	hm	increased circulating glucose level
Cacna1e<tm1Hssh>/Cacna1e<tm1Hssh>	involves: 129S4/SvJae * C57BL/6J	MGI:2451032	hm	abnormal channel response
Cacna1e<tm1Hssh>/Cacna1e<tm1Hssh>	involves: 129S4/SvJae * C57BL/6J	MGI:2451032	hm	abnormal fear/anxiety-related behavior
Cacna1e<tm1Hssh>/Cacna1e<tm1Hssh>	involves: 129S4/SvJae * C57BL/6J	MGI:2451032	hm	increased thigmotaxis
Cacna1e<tm1Rjml>/Cacna1e<tm1Rjml>	involves: 129S1/Sv * C57BL/6J	MGI:2181769	hm	no abnormal phenotype detected
Cacna1e<tm1Ttan>/Cacna1e<tm1Ttan>	involves: 129S4/SvJae * C57BL/6	MGI:2181767	hm	abnormal fear/anxiety-related behavior
Cacna1e<tm1Ttan>/Cacna1e<tm1Ttan>	involves: 129S4/SvJae * C57BL/6	MGI:2181767	hm	abnormal motor capabilities/coordination/movement
Cacna1e<tm1Ttan>/Cacna1e<tm1Ttan>	involves: 129S4/SvJae * C57BL/6	MGI:2181767	hm	abnormal sensory capabilities/reflexes/nociception
Cdk5r1<tm1Ivi>/Cdk5r1<tm1Ivi>	B6.Cg-Cdk5r1<tm1Ivi>	MGI:2683312	hm	abnormal cerebellum morphology
Cdk5r1<tm1Ivi>/Cdk5r1<tm1Ivi>	B6.Cg-Cdk5r1<tm1Ivi>	MGI:2683312	hm	abnormal stratification in cerebral cortex
Cdk5r1<tm1Ivi>/Cdk5r1<tm1Ivi>	B6.Cg-Cdk5r1<tm1Ivi>	MGI:2683312	hm	delaminated Purkinje cell layer
Cdk5r1<tm1Ivi>/Cdk5r1<tm1Ivi>	B6.Cg-Cdk5r1<tm1Ivi>	MGI:2683312	hm	ectopic cerebellar granule cells
Cdk5r1<tm1Lht>/Cdk5r1<tm1Lht>	involves: 129S4/SvJae	MGI:3721424	hm	abnormal axon extension
Cdk5r1<tm1Lht>/Cdk5r1<tm1Lht>	involves: 129S4/SvJae	MGI:3721424	hm	abnormal behavioral response to xenobiotic
Cdk5r1<tm1Lht>/Cdk5r1<tm1Lht>	involves: 129S4/SvJae	MGI:3721424	hm	abnormal cerebellar molecular layer
Cdk5r1<tm1Lht>/Cdk5r1<tm1Lht>	involves: 129S4/SvJae	MGI:3721424	hm	abnormal cerebral cortex morphology
Cdk5r1<tm1Lht>/Cdk5r1<tm1Lht>	involves: 129S4/SvJae	MGI:3721424	hm	abnormal dentate gyrus morphology
Cdk5r1<tm1Lht>/Cdk5r1<tm1Lht>	involves: 129S4/SvJae	MGI:3721424	hm	abnormal forebrain development
Cdk5r1<tm1Lht>/Cdk5r1<tm1Lht>	involves: 129S4/SvJae	MGI:3721424	hm	abnormal forebrain morphology
Cdk5r1<tm1Lht>/Cdk5r1<tm1Lht>	involves: 129S4/SvJae	MGI:3721424	hm	abnormal hippocampus layer morphology
Cdk5r1<tm1Lht>/Cdk5r1<tm1Lht>	involves: 129S4/SvJae	MGI:3721424	hm	abnormal hippocampus morphology
Cdk5r1<tm1Lht>/Cdk5r1<tm1Lht>	involves: 129S4/SvJae	MGI:3721424	hm	abnormal innervation
Cdk5r1<tm1Lht>/Cdk5r1<tm1Lht>	involves: 129S4/SvJae	MGI:3721424	hm	abnormal olfactory bulb development
Cdk5r1<tm1Lht>/Cdk5r1<tm1Lht>	involves: 129S4/SvJae	MGI:3721424	hm	abnormal physiological response to xenobiotic
Cdk5r1<tm1Lht>/Cdk5r1<tm1Lht>	involves: 129S4/SvJae	MGI:3721424	hm	abnormal sensitization to xenobiotic
Cdk5r1<tm1Lht>/Cdk5r1<tm1Lht>	involves: 129S4/SvJae	MGI:3721424	hm	abnormal stratification in cerebral cortex
Cdk5r1<tm1Lht>/Cdk5r1<tm1Lht>	involves: 129S4/SvJae	MGI:3721424	hm	abnormal striatum morphology
Cdk5r1<tm1Lht>/Cdk5r1<tm1Lht>	involves: 129S4/SvJae	MGI:3721424	hm	Attention Deficit-Hyperactivity Disorder
Cdk5r1<tm1Lht>/Cdk5r1<tm1Lht>	involves: 129S4/SvJae	MGI:3721424	hm	decreased corpus callosum size
Cdk5r1<tm1Lht>/Cdk5r1<tm1Lht>	involves: 129S4/SvJae	MGI:3721424	hm	dilated lateral ventricles
Cdk5r1<tm1Lht>/Cdk5r1<tm1Lht>	involves: 129S4/SvJae	MGI:3721424	hm	ectopic Purkinje cell
Cdk5r1<tm1Lht>/Cdk5r1<tm1Lht>	involves: 129S4/SvJae	MGI:3721424	hm	enhanced cellular glucose import
Cdk5r1<tm1Lht>/Cdk5r1<tm1Lht>	involves: 129S4/SvJae	MGI:3721424	hm	hyperactivity
Cdk5r1<tm1Lht>/Cdk5r1<tm1Lht>	involves: 129S4/SvJae	MGI:3721424	hm	increased serotonin level
Cdk5r1<tm1Lht>/Cdk5r1<tm1Lht>	involves: 129S4/SvJae	MGI:3721424	hm	premature death
Cdk5r1<tm1Lht>/Cdk5r1<tm1Lht>	involves: 129S4/SvJae	MGI:3721424	hm	reduced long term potentiation
Cdk5r1<tm1Lht>/Cdk5r1<tm1Lht>	involves: 129S4/SvJae	MGI:3721424	hm	seizures
Cdk5r1<tm1Lht>/Cdk5r1<tm1Lht>	involves: 129S4/SvJae * C57BL/6	MGI:2175756	hm	abnormal cerebellar molecular layer
Cdk5r1<tm1Lht>/Cdk5r1<tm1Lht>	involves: 129S4/SvJae * C57BL/6	MGI:2175756	hm	abnormal cerebral cortex morphology
Cdk5r1<tm1Lht>/Cdk5r1<tm1Lht>	involves: 129S4/SvJae * C57BL/6	MGI:2175756	hm	abnormal cerebral cortex pyramidal cell morphology
Cdk5r1<tm1Lht>/Cdk5r1<tm1Lht>	involves: 129S4/SvJae * C57BL/6	MGI:2175756	hm	abnormal dentate gyrus morphology
Cdk5r1<tm1Lht>/Cdk5r1<tm1Lht>	involves: 129S4/SvJae * C57BL/6	MGI:2175756	hm	abnormal forebrain morphology
Cdk5r1<tm1Lht>/Cdk5r1<tm1Lht>	involves: 129S4/SvJae * C57BL/6	MGI:2175756	hm	abnormal hippocampus layer morphology
Cdk5r1<tm1Lht>/Cdk5r1<tm1Lht>	involves: 129S4/SvJae * C57BL/6	MGI:2175756	hm	abnormal hippocampus morphology
Cdk5r1<tm1Lht>/Cdk5r1<tm1Lht>	involves: 129S4/SvJae * C57BL/6	MGI:2175756	hm	abnormal olfactory bulb development
Cdk5r1<tm1Lht>/Cdk5r1<tm1Lht>	involves: 129S4/SvJae * C57BL/6	MGI:2175756	hm	abnormal striatum morphology
Cdk5r1<tm1Lht>/Cdk5r1<tm1Lht>	involves: 129S4/SvJae * C57BL/6	MGI:2175756	hm	abnormal subplate morphology
Cdk5r1<tm1Lht>/Cdk5r1<tm1Lht>	involves: 129S4/SvJae * C57BL/6	MGI:2175756	hm	decreased corpus callosum size
Cdk5r1<tm1Lht>/Cdk5r1<tm1Lht>	involves: 129S4/SvJae * C57BL/6	MGI:2175756	hm	dilated lateral ventricles
Cdk5r1<tm1Lht>/Cdk5r1<tm1Lht>	involves: 129S4/SvJae * C57BL/6	MGI:2175756	hm	ectopic Purkinje cell
Cdk5r1<tm1Lht>/Cdk5r1<tm1Lht>	involves: 129S4/SvJae * C57BL/6	MGI:2175756	hm	increased susceptibility to pharmacologically induced seizures
Cdk5r1<tm1Lht>/Cdk5r1<tm1Lht>	involves: 129S4/SvJae * C57BL/6	MGI:2175756	hm	premature death
Cdk5r1<tm1Lht>/Cdk5r1<tm1Lht>	involves: 129S4/SvJae * C57BL/6	MGI:2175756	hm	seizures
Cdk5r1<tm1Lht>/Cdk5r1<tm1Lht>	involves: 129S4/SvJae * C57BL/6	MGI:2175756	hm	thin cortical plate
Cdk5r1<tm1Ohsh>/Cdk5r1<tm1Ohsh>	involves: 129 * C57BL/6J	MGI:3719575	hm	abnormal hippocampus granule cell morphology
Cdk5r1<tm1Ohsh>/Cdk5r1<tm1Ohsh>	involves: 129 * C57BL/6J	MGI:3719575	hm	abnormal hippocampus pyramidal cell morphology
Cdk5r1<tm1Ohsh>/Cdk5r1<tm1Ohsh>	involves: 129 * C57BL/6J	MGI:3719575	hm	abnormal spatial learning
Cdk5r1<tm1Ohsh>/Cdk5r1<tm1Ohsh>	involves: 129 * C57BL/6J	MGI:3719575	hm	reduced long term depression
Cdk5r1<tm1Ohsh>/Cdk5r1<tm1Ohsh>	Not Specified	MGI:3719564	hm	increased thermal nociceptive threshold
Cplx2<tm1Rmnd>/Cplx2<tm1Rmnd>	B6NCrl.Cg-Cplx2<tm1Rmnd>	MGI:5285873	hm	abnormal spatial learning
Cplx2<tm1Rmnd>/Cplx2<tm1Rmnd>	B6NCrl.Cg-Cplx2<tm1Rmnd>	MGI:5285873	hm	abnormal spatial reference memory
Cplx2<tm1Rmnd>/Cplx2<tm1Rmnd>	B6NCrl.Cg-Cplx2<tm1Rmnd>	MGI:5285873	hm	behavior/neurological phenotype
Cplx2<tm1Rmnd>/Cplx2<tm1Rmnd>	B6NCrl.Cg-Cplx2<tm1Rmnd>	MGI:5285873	hm	hypoactivity
Cplx2<tm1Rmnd>/Cplx2<tm1Rmnd>	B6NCrl.Cg-Cplx2<tm1Rmnd>	MGI:5285873	hm	impaired coordination
Cplx2<tm1Rmnd>/Cplx2<tm1Rmnd>	B6NCrl.Cg-Cplx2<tm1Rmnd>	MGI:5285873	hm	increased startle reflex
Cplx2<tm1Rmnd>/Cplx2<tm1Rmnd>	B6NCrl.Cg-Cplx2<tm1Rmnd>	MGI:5285873	hm	increased thigmotaxis
Cplx2<tm1Rmnd>/Cplx2<tm1Rmnd>	B6NCrl.Cg-Cplx2<tm1Rmnd>	MGI:5285873	hm	induced hyperactivity
Cplx2<tm1Rmnd>/Cplx2<tm1Rmnd>	B6NCrl.Cg-Cplx2<tm1Rmnd>	MGI:5285873	hm	limb grasping
Cplx2<tm1Rmnd>/Cplx2<tm1Rmnd>	B6NCrl.Cg-Cplx2<tm1Rmnd>	MGI:5285873	hm	Schizophrenia
Cplx2<tm1Rmnd>/Cplx2<tm1Rmnd>	B6NCrl.Cg-Cplx2<tm1Rmnd>	MGI:5285873	hm	small hippocampus
Cplx2<tm1Rmnd>/Cplx2<tm1Rmnd>	Not Specified	MGI:2679652	hm	abnormal anxiety-related response
Cplx2<tm1Rmnd>/Cplx2<tm1Rmnd>	Not Specified	MGI:2679652	hm	abnormal fear/anxiety-related behavior
Cplx2<tm1Rmnd>/Cplx2<tm1Rmnd>	Not Specified	MGI:2679652	hm	abnormal gait
Cplx2<tm1Rmnd>/Cplx2<tm1Rmnd>	Not Specified	MGI:2679652	hm	abnormal grooming behavior
Cplx2<tm1Rmnd>/Cplx2<tm1Rmnd>	Not Specified	MGI:2679652	hm	abnormal learning/memory/conditioning
Cplx2<tm1Rmnd>/Cplx2<tm1Rmnd>	Not Specified	MGI:2679652	hm	abnormal locomotor behavior
Cplx2<tm1Rmnd>/Cplx2<tm1Rmnd>	Not Specified	MGI:2679652	hm	abnormal motor capabilities/coordination/movement
Cplx2<tm1Rmnd>/Cplx2<tm1Rmnd>	Not Specified	MGI:2679652	hm	abnormal posture
Cplx2<tm1Rmnd>/Cplx2<tm1Rmnd>	Not Specified	MGI:2679652	hm	abnormal spatial learning
Cplx2<tm1Rmnd>/Cplx2<tm1Rmnd>	Not Specified	MGI:2679652	hm	abnormal whisker trimming behavior
Cplx2<tm1Rmnd>/Cplx2<tm1Rmnd>	Not Specified	MGI:2679652	hm	decreased exploration in new environment
Cplx2<tm1Rmnd>/Cplx2<tm1Rmnd>	Not Specified	MGI:2679652	hm	decreased grooming behavior
Cplx2<tm1Rmnd>/Cplx2<tm1Rmnd>	Not Specified	MGI:2679652	hm	decreased vertical activity
Cplx2<tm1Rmnd>/Cplx2<tm1Rmnd>	Not Specified	MGI:2679652	hm	impaired coordination
Cplx2<tm1Rmnd>/Cplx2<tm1Rmnd>	Not Specified	MGI:2679652	hm	novel environmental response-related retropulsion
Cplx2<tm1Rmnd>/Cplx2<tm1Rmnd>	Not Specified	MGI:2679652	hm	short stride length
Cplx2<tm1Rmnd>/Cplx2<tm1Rmnd>	Not Specified	MGI:2679652	hm	tail dragging
Cplx2<tm1Tyag>/Cplx2<tm1Tyag>	B6.Cg-Cplx2<tm1Tyag>	MGI:3719642	hm	reduced long term potentiation
Cplx2<tm1Tyag>/Cplx2<tm1Tyag>	involves: C57BL/6 * CBA	MGI:3719586	hm	reduced long term potentiation
Cx3cl1<tm1Lira>/Cx3cl1<tm1Lira>	involves: 129S/SvEv * C57BL/6	MGI:2447466	hm	behavior/neurological phenotype
Cx3cl1<tm1Lira>/Cx3cl1<tm1Lira>	involves: 129S/SvEv * C57BL/6	MGI:2447466	hm	hematopoietic system phenotype
Cx3cl1<tm1Lira>/Cx3cl1<tm1Lira>	involves: 129S/SvEv * C57BL/6	MGI:2447466	hm	immune system phenotype
Cx3cl1<tm1Lira>/Cx3cl1<tm1Lira>	involves: 129S/SvEv * C57BL/6	MGI:2447466	hm	nervous system phenotype
Cx3cl1<tm1Lira>/Cx3cl1<tm1Lira>	involves: C57BL/6	MGI:4834193	hm	decreased monocyte cell number
Cx3cl1<tm1Lira>/Cx3cl1<tm1Lira>	Not Specified	MGI:4833987	hm	increased susceptibility to dopaminergic neuron neurotoxicity
Cx3cl1<tm1Sgs>/Cx3cl1<tm1Sgs>	involves: 129S4/SvJae	MGI:3527868	hm	decreased cerebral infarction size
Cyp46a1<tm1Rus>/Cyp46a1<tm1Rus>	involves: 129 * C57BL/6J	MGI:2669517	hm	abnormal cholesterol homeostasis
D430041D05Rik<tm1a(EUCOMM)Hmgu>/D430041D05Rik<tm1a(EUCOMM)Hmgu>	Not Specified	MGI:5450520	hm	abnormal coat/hair pigmentation
D430041D05Rik<tm1a(EUCOMM)Hmgu>/D430041D05Rik<tm1a(EUCOMM)Hmgu>	Not Specified	MGI:5450520	hm	abnormal vocalization
D430041D05Rik<tm1a(EUCOMM)Hmgu>/D430041D05Rik<tm1a(EUCOMM)Hmgu>	Not Specified	MGI:5450520	hm	decreased CD4-positive, alpha beta T cell number
D430041D05Rik<tm1a(EUCOMM)Hmgu>/D430041D05Rik<tm1a(EUCOMM)Hmgu>	Not Specified	MGI:5450520	hm	decreased total body fat amount
D430041D05Rik<tm1a(EUCOMM)Hmgu>/D430041D05Rik<tm1a(EUCOMM)Hmgu>	Not Specified	MGI:5450520	hm	increased grip strength
D430041D05Rik<tm1a(EUCOMM)Hmgu>/D430041D05Rik<tm1a(EUCOMM)Hmgu>	Not Specified	MGI:5450520	hm	increased lean body mass
D430041D05Rik<tm1a(EUCOMM)Hmgu>/D430041D05Rik<tm1a(EUCOMM)Hmgu>	Not Specified	MGI:5450520	hm	other aberrant phenotype
Erc2<tm1.1Sud>/Erc2<tm1.1Sud>	involves: 129S1/Sv * 129S4/SvJae * 129X1/SvJ	MGI:4940523	hm	abnormal CNS synaptic transmission
Erc2<tm1.1Sud>/Erc2<tm1.1Sud>	involves: 129S1/Sv * 129S4/SvJae * 129X1/SvJ	MGI:4940523	hm	abnormal inhibitory postsynaptic currents
Erc2<tm1.1Sud>/Erc2<tm1.1Sud>	involves: 129S1/Sv * 129S4/SvJae * 129X1/SvJ	MGI:4940523	hm	abnormal neurotransmitter level
Erc2<tm1.1Sud>/Erc2<tm1.1Sud>	involves: 129S1/Sv * 129S4/SvJae * 129X1/SvJ	MGI:4940523	hm	abnormal synapse morphology
Erc2<tm1.1Sud>/Erc2<tm1.1Sud>	involves: 129S1/Sv * 129S4/SvJae * 129X1/SvJ	MGI:4940523	hm	abnormal synaptic vesicle number
Erc2<tm1.1Sud>/Erc2<tm1.1Sud>	involves: 129S1/Sv * 129S4/SvJae * 129X1/SvJ	MGI:4940523	hm	increased exploration in new environment
Erc2<tm1.1Sud>/Erc2<tm1.1Sud>	involves: 129S1/Sv * 129X1/SvJ * C57BL/6	MGI:3784013	hm	abnormal CNS synaptic transmission
Erc2<tm1.1Sud>/Erc2<tm1.1Sud>	involves: 129S1/Sv * 129X1/SvJ * C57BL/6	MGI:3784013	hm	abnormal inhibitory postsynaptic currents
Erc2<tm1.1Sud>/Erc2<tm1.1Sud>	involves: 129S1/Sv * 129X1/SvJ * C57BL/6	MGI:3784013	hm	abnormal neurotransmitter level
Erc2<tm1Toh>/Erc2<tm1Toh>	Not Specified	MGI:5440305	hm	abnormal eye electrophysiology
Erc2<tm1Toh>/Erc2<tm1Toh>	Not Specified	MGI:5440305	hm	abnormal horizontal cell morphology
Erc2<tm1Toh>/Erc2<tm1Toh>	Not Specified	MGI:5440305	hm	abnormal retinal bipolar cell morphology
Erc2<tm1Toh>/Erc2<tm1Toh>	Not Specified	MGI:5440305	hm	abnormal retinal outer nuclear layer morphology
Erc2<tm1Toh>/Erc2<tm1Toh>	Not Specified	MGI:5440305	hm	abnormal retinal outer plexiform layer morphology
Erc2<tm1Toh>/Erc2<tm1Toh>	Not Specified	MGI:5440305	hm	abnormal retinal rod cell morphology
Erc2<tm1Toh>/Erc2<tm1Toh>	Not Specified	MGI:5440305	hm	abnormal retina morphology
Erc2<tm1Toh>/Erc2<tm1Toh>	Not Specified	MGI:5440305	hm	abnormal rod electrophysiology
Erc2<tm1Toh>/Erc2<tm1Toh>	Not Specified	MGI:5440305	hm	abnormal vision
Erc2<tm1Toh>/Erc2<tm1Toh>	Not Specified	MGI:5440305	hm	thin retinal outer plexiform layer
Fbxo45<tm1Kei>/Fbxo45<tm1Kei>	B6.Cg-Fbxo45<tm1Kei>	MGI:3849743	hm	abnormal axon fasciculation
Fbxo45<tm1Kei>/Fbxo45<tm1Kei>	B6.Cg-Fbxo45<tm1Kei>	MGI:3849743	hm	abnormal cortical plate morphology
Fbxo45<tm1Kei>/Fbxo45<tm1Kei>	B6.Cg-Fbxo45<tm1Kei>	MGI:3849743	hm	abnormal motor neuron innervation pattern
Fbxo45<tm1Kei>/Fbxo45<tm1Kei>	B6.Cg-Fbxo45<tm1Kei>	MGI:3849743	hm	abnormal motor neuron morphology
Fbxo45<tm1Kei>/Fbxo45<tm1Kei>	B6.Cg-Fbxo45<tm1Kei>	MGI:3849743	hm	abnormal nervous system tract morphology
Fbxo45<tm1Kei>/Fbxo45<tm1Kei>	B6.Cg-Fbxo45<tm1Kei>	MGI:3849743	hm	abnormal neuromuscular synapse morphology
Fbxo45<tm1Kei>/Fbxo45<tm1Kei>	B6.Cg-Fbxo45<tm1Kei>	MGI:3849743	hm	abnormal neuronal migration
Fbxo45<tm1Kei>/Fbxo45<tm1Kei>	B6.Cg-Fbxo45<tm1Kei>	MGI:3849743	hm	abnormal sensory neuron innervation pattern
Fbxo45<tm1Kei>/Fbxo45<tm1Kei>	B6.Cg-Fbxo45<tm1Kei>	MGI:3849743	hm	abnormal spinal cord grey matter morphology
Fbxo45<tm1Kei>/Fbxo45<tm1Kei>	B6.Cg-Fbxo45<tm1Kei>	MGI:3849743	hm	abnormal telencephalon development
Fbxo45<tm1Kei>/Fbxo45<tm1Kei>	B6.Cg-Fbxo45<tm1Kei>	MGI:3849743	hm	absent anterior commissure
Fbxo45<tm1Kei>/Fbxo45<tm1Kei>	B6.Cg-Fbxo45<tm1Kei>	MGI:3849743	hm	absent brain internal capsule
Fbxo45<tm1Kei>/Fbxo45<tm1Kei>	B6.Cg-Fbxo45<tm1Kei>	MGI:3849743	hm	complete neonatal lethality
Fbxo45<tm1Kei>/Fbxo45<tm1Kei>	B6.Cg-Fbxo45<tm1Kei>	MGI:3849743	hm	decreased brain size
Fbxo45<tm1Kei>/Fbxo45<tm1Kei>	B6.Cg-Fbxo45<tm1Kei>	MGI:3849743	hm	kyphosis
Fbxo45<tm1Kei>/Fbxo45<tm1Kei>	B6.Cg-Fbxo45<tm1Kei>	MGI:3849743	hm	nervous system phenotype
Fbxo45<tm1Kei>/Fbxo45<tm1Kei>	B6.Cg-Fbxo45<tm1Kei>	MGI:3849743	hm	no spontaneous movement
Fbxo45<tm1Kei>/Fbxo45<tm1Kei>	B6.Cg-Fbxo45<tm1Kei>	MGI:3849743	hm	pallor
Fbxo45<tm1Kei>/Fbxo45<tm1Kei>	B6.Cg-Fbxo45<tm1Kei>	MGI:3849743	hm	respiratory failure
Fbxo45<tm1Kei>/Fbxo45<tm1Kei>	B6.Cg-Fbxo45<tm1Kei>	MGI:3849743	hm	trunk curl
Gabrb3<tm1Geh>/Gabrb3<tm1Geh>	involves: 129S1/Sv * 129X1/SvJ * C57BL/6	MGI:3713530	hm	abnormal auditory brainstem response waveform shape
Gabrb3<tm1Geh>/Gabrb3<tm1Geh>	involves: 129S1/Sv * 129X1/SvJ * C57BL/6	MGI:3713530	hm	abnormal CNS synaptic transmission
Gabrb3<tm1Geh>/Gabrb3<tm1Geh>	involves: 129S1/Sv * 129X1/SvJ * C57BL/6	MGI:3713530	hm	abnormal cochlea morphology
Gabrb3<tm1Geh>/Gabrb3<tm1Geh>	involves: 129S1/Sv * 129X1/SvJ * C57BL/6	MGI:3713530	hm	abnormal cochlear IHC afferent innervation pattern
Gabrb3<tm1Geh>/Gabrb3<tm1Geh>	involves: 129S1/Sv * 129X1/SvJ * C57BL/6	MGI:3713530	hm	abnormal cochlear nerve morphology
Gabrb3<tm1Geh>/Gabrb3<tm1Geh>	involves: 129S1/Sv * 129X1/SvJ * C57BL/6	MGI:3713530	hm	abnormal cochlear OHC efferent innervation pattern
Gabrb3<tm1Geh>/Gabrb3<tm1Geh>	involves: 129S1/Sv * 129X1/SvJ * C57BL/6	MGI:3713530	hm	abnormal distortion product otoacoustic emission
Gabrb3<tm1Geh>/Gabrb3<tm1Geh>	involves: 129S1/Sv * 129X1/SvJ * C57BL/6	MGI:3713530	hm	abnormal motor capabilities/coordination/movement
Gabrb3<tm1Geh>/Gabrb3<tm1Geh>	involves: 129S1/Sv * 129X1/SvJ * C57BL/6	MGI:3713530	hm	abnormal parental behavior
Gabrb3<tm1Geh>/Gabrb3<tm1Geh>	involves: 129S1/Sv * 129X1/SvJ * C57BL/6	MGI:3713530	hm	circling
Gabrb3<tm1Geh>/Gabrb3<tm1Geh>	involves: 129S1/Sv * 129X1/SvJ * C57BL/6	MGI:3713530	hm	cleft palate
Gabrb3<tm1Geh>/Gabrb3<tm1Geh>	involves: 129S1/Sv * 129X1/SvJ * C57BL/6	MGI:3713530	hm	cochlear ganglion degeneration
Gabrb3<tm1Geh>/Gabrb3<tm1Geh>	involves: 129S1/Sv * 129X1/SvJ * C57BL/6	MGI:3713530	hm	cochlear ganglion hypoplasia
Gabrb3<tm1Geh>/Gabrb3<tm1Geh>	involves: 129S1/Sv * 129X1/SvJ * C57BL/6	MGI:3713530	hm	cochlear inner hair cell degeneration
Gabrb3<tm1Geh>/Gabrb3<tm1Geh>	involves: 129S1/Sv * 129X1/SvJ * C57BL/6	MGI:3713530	hm	cochlear outer hair cell degeneration
Gabrb3<tm1Geh>/Gabrb3<tm1Geh>	involves: 129S1/Sv * 129X1/SvJ * C57BL/6	MGI:3713530	hm	decreased body size
Gabrb3<tm1Geh>/Gabrb3<tm1Geh>	involves: 129S1/Sv * 129X1/SvJ * C57BL/6	MGI:3713530	hm	hyperactivity
Gabrb3<tm1Geh>/Gabrb3<tm1Geh>	involves: 129S1/Sv * 129X1/SvJ * C57BL/6	MGI:3713530	hm	hyperresponsive
Gabrb3<tm1Geh>/Gabrb3<tm1Geh>	involves: 129S1/Sv * 129X1/SvJ * C57BL/6	MGI:3713530	hm	impaired coordination
Gabrb3<tm1Geh>/Gabrb3<tm1Geh>	involves: 129S1/Sv * 129X1/SvJ * C57BL/6	MGI:3713530	hm	impaired swimming
Gabrb3<tm1Geh>/Gabrb3<tm1Geh>	involves: 129S1/Sv * 129X1/SvJ * C57BL/6	MGI:3713530	hm	increased or absent threshold for auditory brainstem response
Gabrb3<tm1Geh>/Gabrb3<tm1Geh>	involves: 129S1/Sv * 129X1/SvJ * C57BL/6	MGI:3713530	hm	limb grasping
Gabrb3<tm1Geh>/Gabrb3<tm1Geh>	involves: 129S1/Sv * 129X1/SvJ * C57BL/6	MGI:3713530	hm	partial perinatal lethality
Gabrb3<tm1Geh>/Gabrb3<tm1Geh>	involves: 129S1/Sv * 129X1/SvJ * C57BL/6	MGI:3713530	hm	premature death
Gabrb3<tm1Geh>/Gabrb3<tm1Geh>	involves: 129S1/Sv * 129X1/SvJ * C57BL/6	MGI:3713530	hm	seizures
Gabrb3<tm1Geh>/Gabrb3<tm1Geh>	involves: 129S1/Sv * 129X1/SvJ * C57BL/6	MGI:3713530	hm	sensorineural hearing loss
Gabrb3<tm1Geh>/Gabrb3<tm1Geh>	involves: 129S1/Sv * 129X1/SvJ * C57BL/6	MGI:3713530	hm	small cochlear ganglion
Gabrb3<tm1Geh>/Gabrb3<tm1Geh>	involves: 129S1/Sv * 129X1/SvJ * C57BL/6	MGI:3713530	hm	small vestibular ganglion
Gabrb3<tm1Geh>/Gabrb3<tm1Geh>	involves: 129S1/Sv * 129X1/SvJ * C57BL/6	MGI:3713530	hm	type IV spiral ligament fibrocyte degeneration
Gabrb3<tm1Geh>/Gabrb3<tm1Geh>	involves: 129S1/Sv * 129X1/SvJ * C57BL/6	MGI:3713530	hm	vestibular ganglion hypoplasia
Gabrb3<tm1Geh>/Gabrb3<tm1Geh>	involves: 129S1/Sv * 129X1/SvJ * C57BL/6J	MGI:2175037	hm	abnormal behavior
Gabrb3<tm1Geh>/Gabrb3<tm1Geh>	involves: 129S1/Sv * 129X1/SvJ * C57BL/6J	MGI:2175037	hm	abnormal cerebellum vermis lobule III morphology
Gabrb3<tm1Geh>/Gabrb3<tm1Geh>	involves: 129S1/Sv * 129X1/SvJ * C57BL/6J	MGI:2175037	hm	abnormal cerebellum vermis lobule II morphology
Gabrb3<tm1Geh>/Gabrb3<tm1Geh>	involves: 129S1/Sv * 129X1/SvJ * C57BL/6J	MGI:2175037	hm	abnormal cerebellum vermis lobule IV morphology
Gabrb3<tm1Geh>/Gabrb3<tm1Geh>	involves: 129S1/Sv * 129X1/SvJ * C57BL/6J	MGI:2175037	hm	abnormal cerebellum vermis lobule morphology
Gabrb3<tm1Geh>/Gabrb3<tm1Geh>	involves: 129S1/Sv * 129X1/SvJ * C57BL/6J	MGI:2175037	hm	abnormal cerebellum vermis lobule VII morphology
Gabrb3<tm1Geh>/Gabrb3<tm1Geh>	involves: 129S1/Sv * 129X1/SvJ * C57BL/6J	MGI:2175037	hm	abnormal cerebellum vermis lobule VI morphology
Gabrb3<tm1Geh>/Gabrb3<tm1Geh>	involves: 129S1/Sv * 129X1/SvJ * C57BL/6J	MGI:2175037	hm	abnormal cerebellum vermis lobule V morphology
Gabrb3<tm1Geh>/Gabrb3<tm1Geh>	involves: 129S1/Sv * 129X1/SvJ * C57BL/6J	MGI:2175037	hm	abnormal nest building behavior
Gabrb3<tm1Geh>/Gabrb3<tm1Geh>	involves: 129S1/Sv * 129X1/SvJ * C57BL/6J	MGI:2175037	hm	abnormal response to novel object
Gabrb3<tm1Geh>/Gabrb3<tm1Geh>	involves: 129S1/Sv * 129X1/SvJ * C57BL/6J	MGI:2175037	hm	abnormal social/conspecific interaction
Gabrb3<tm1Geh>/Gabrb3<tm1Geh>	involves: 129S1/Sv * 129X1/SvJ * C57BL/6J	MGI:2175037	hm	Autism
Gabrb3<tm1Geh>/Gabrb3<tm1Geh>	involves: 129S1/Sv * 129X1/SvJ * C57BL/6J	MGI:2175037	hm	circling
Gabrb3<tm1Geh>/Gabrb3<tm1Geh>	involves: 129S1/Sv * 129X1/SvJ * C57BL/6J	MGI:2175037	hm	decreased vertical activity
Gabrb3<tm1Geh>/Gabrb3<tm1Geh>	involves: 129S1/Sv * 129X1/SvJ * C57BL/6J	MGI:2175037	hm	hyperactivity
Gabrb3<tm2.2Geh>/Gabrb3<tm2.2Geh>	involves: 129S1/Sv * 129X1/SvJ * C57BL/6 * FVB/N * SJL	MGI:3767260	hm	cleft palate
Gabrb3<tm2.2Geh>/Gabrb3<tm2.2Geh>	involves: 129S1/Sv * 129X1/SvJ * C57BL/6 * FVB/N * SJL	MGI:3767260	hm	complete lethality at weaning
Gabrb3<tm2.2Geh>/Gabrb3<tm2.2Geh>	involves: 129S1/Sv * 129X1/SvJ * C57BL/6 * FVB/N * SJL	MGI:3767260	hm	partial neonatal lethality
Gria2<tm1Ksak>/Gria2<tm1Ksak>	Not Specified	MGI:4949281	hm	no phenotypic analysis
Gria2<tm1Rlh>/Gria2<tm1Rlh>	involves: 129S1/Sv * 129X1/SvJ * C57BL/6	MGI:3589567	hm	impaired synaptic plasticity
Gria2<tm1Rod>/Gria2<tm1Rod>	B6.129-Gria2<tm1Rod>/J	MGI:4834610	hm	abnormal AMPA-mediated synaptic currents
Gria2<tm1Rod>/Gria2<tm1Rod>	B6.129-Gria2<tm1Rod>/J	MGI:4834610	hm	abnormal limb posture
Gria2<tm1Rod>/Gria2<tm1Rod>	B6.129-Gria2<tm1Rod>/J	MGI:4834610	hm	abnormal response to novel object
Gria2<tm1Rod>/Gria2<tm1Rod>	B6.129-Gria2<tm1Rod>/J	MGI:4834610	hm	decreased grip strength
Gria2<tm1Rod>/Gria2<tm1Rod>	B6.129-Gria2<tm1Rod>/J	MGI:4834610	hm	hypoactivity
Gria2<tm1Rod>/Gria2<tm1Rod>	B6.129-Gria2<tm1Rod>/J	MGI:4834610	hm	impaired coordination
Gria2<tm1Rod>/Gria2<tm1Rod>	B6.129-Gria2<tm1Rod>/J	MGI:4834610	hm	increased susceptibility to neuronal excitotoxicity
Gria2<tm1Rod>/Gria2<tm1Rod>	involves: 129S1/Sv * 129X1/SvJ * CD-1	MGI:2176810	hm	abnormal reflex
Gria2<tm1Rod>/Gria2<tm1Rod>	involves: 129S1/Sv * 129X1/SvJ * CD-1	MGI:2176810	hm	abnormal response to novel object
Gria2<tm1Rod>/Gria2<tm1Rod>	involves: 129S1/Sv * 129X1/SvJ * CD-1	MGI:2176810	hm	decreased body size
Gria2<tm1Rod>/Gria2<tm1Rod>	involves: 129S1/Sv * 129X1/SvJ * CD-1	MGI:2176810	hm	decreased body weight
Gria2<tm1Rod>/Gria2<tm1Rod>	involves: 129S1/Sv * 129X1/SvJ * CD-1	MGI:2176810	hm	decreased exploration in new environment
Gria2<tm1Rod>/Gria2<tm1Rod>	involves: 129S1/Sv * 129X1/SvJ * CD-1	MGI:2176810	hm	decreased grooming behavior
Gria2<tm1Rod>/Gria2<tm1Rod>	involves: 129S1/Sv * 129X1/SvJ * CD-1	MGI:2176810	hm	enhanced long term potentiation
Gria2<tm1Rod>/Gria2<tm1Rod>	involves: 129S1/Sv * 129X1/SvJ * CD-1	MGI:2176810	hm	impaired coordination
Gria2<tm1Rod>/Gria2<tm1Rod>	involves: 129S1/Sv * 129X1/SvJ * CD-1	MGI:2176810	hm	partial postnatal lethality
Gria2<tm1Sans>/Gria2<tm1Sans>	involves: 129S/SvEv	MGI:3719490	hm	hearing/vestibular/ear phenotype
Gria2<tm2Rsp>/Gria2<tm2Rsp>	involves: 129S1/Sv * 129X1/SvJ	MGI:3612255	hm	abnormal AMPA-mediated synaptic currents
Gria2<tm2Rsp>/Gria2<tm2Rsp>	involves: 129S1/Sv * 129X1/SvJ	MGI:3612255	hm	abnormal excitatory postsynaptic potential
Gria2<tm2Rsp>/Gria2<tm2Rsp>	involves: 129S1/Sv * 129X1/SvJ	MGI:3612255	hm	abnormal hippocampus CA3 region morphology
Gria2<tm2Rsp>/Gria2<tm2Rsp>	involves: 129S1/Sv * 129X1/SvJ	MGI:3612255	hm	complete postnatal lethality
Gria2<tm2Rsp>/Gria2<tm2Rsp>	involves: 129S1/Sv * 129X1/SvJ	MGI:3612255	hm	decreased body weight
Gria2<tm2Rsp>/Gria2<tm2Rsp>	involves: 129S1/Sv * 129X1/SvJ	MGI:3612255	hm	lethargy
Gria2<tm2Rsp>/Gria2<tm2Rsp>	involves: 129S1/Sv * 129X1/SvJ	MGI:3612255	hm	postnatal growth retardation
Gria2<tm3.1Rsp>/Gria2<tm3.1Rsp>	involves: CD-1	MGI:3588769	hm	abnormal nociception after inflammation
Gria2<tm3.1Rsp>/Gria2<tm3.1Rsp>	involves: CD-1	MGI:3588769	hm	abnormal spinal cord morphology
Gria2<tm3.1Rsp>/Gria2<tm3.1Rsp>	involves: CD-1	MGI:3588769	hm	abnormal touch/ nociception
Gria2<tm3.1Rsp>/Gria2<tm3.1Rsp>	involves: CD-1	MGI:3588769	hm	decreased chemical nociceptive threshold
Gria2<tm3.1Rsp>/Gria2<tm3.1Rsp>	involves: CD-1	MGI:3588769	hm	enhanced AMPA-mediated synaptic currents
Gria2<tm3.1Rsp>/Gria2<tm3.1Rsp>	involves: CD-1	MGI:3588769	hm	hyperalgesia
Gria2<tm3.1Rsp>/Gria2<tm3.1Rsp>	involves: CD-1	MGI:3588769	hm	impaired synaptic plasticity
Gria3<tm1Dgen>/Gria3<tm1Dgen>	involves: 129P2/OlaHsd * C57BL/6	MGI:3606450	hm	decreased body weight
Gria3<tm1Dgen>/Gria3<tm1Dgen>	involves: 129P2/OlaHsd * C57BL/6J	MGI:3795130	hm	behavior/neurological phenotype
Gria3<tm1Ksak>/Gria3<tm1Ksak>	Not Specified	MGI:4949282	hm	no phenotypic analysis
Gria3<tm1Rlh>/Gria3<tm1Rlh>	involves: 129S1/Sv * 129X1/SvJ * C57BL/6	MGI:3716311	hm	nervous system phenotype
Gria3<tm2Rlh>/Gria3<tm2Rlh>	involves: 129S1/Sv * 129X1/SvJ * C57BL/6	MGI:3716312	hm	nervous system phenotype
Grin2b<tm1Mim>/Grin2b<tm1Mim>	involves: C57BL/6 * CBA	MGI:4360658	hm	abnormal AMPA-mediated synaptic currents
Grin2b<tm1Mim>/Grin2b<tm1Mim>	involves: C57BL/6 * CBA	MGI:4360658	hm	absence of NMDA-mediated synaptic currents
Grin2b<tm1Mim>/Grin2b<tm1Mim>	involves: C57BL/6 * CBA	MGI:4360658	hm	absent gastric milk in neonates
Grin2b<tm1Mim>/Grin2b<tm1Mim>	involves: C57BL/6 * CBA	MGI:4360658	hm	absent long term depression
Grin2b<tm1Mim>/Grin2b<tm1Mim>	involves: C57BL/6 * CBA	MGI:4360658	hm	complete neonatal lethality
Grin2b<tm1Mim>/Grin2b<tm1Mim>	involves: C57BL/6 * CBA	MGI:4360658	hm	disorganized barrel cortex
Grin2b<tm1Mim>/Grin2b<tm1Mim>	involves: C57BL/6 * CBA	MGI:4360658	hm	no suckling reflex
Grin2b<tm1Rsp>/Grin2b<tm1Rsp>	involves: 129S1/Sv * 129X1/SvJ	MGI:3847251	hm	abnormal NMDA-mediated synaptic currents
Grin2b<tm1Rsp>/Grin2b<tm1Rsp>	involves: 129S1/Sv * 129X1/SvJ	MGI:3847251	hm	complete neonatal lethality
Grin2b<tm2Mim>/Grin2b<tm2Mim>	involves: C57BL/6 * CBA	MGI:3845824	hm	abnormal CNS synaptic transmission
Grin2b<tm2Mim>/Grin2b<tm2Mim>	involves: C57BL/6 * CBA	MGI:3845824	hm	abnormal excitatory postsynaptic potential
Grin2b<tm2Mim>/Grin2b<tm2Mim>	involves: C57BL/6 * CBA	MGI:3845824	hm	abnormal long term depression
Grin2b<tm2Mim>/Grin2b<tm2Mim>	involves: C57BL/6 * CBA	MGI:3845824	hm	complete postnatal lethality
Hrh3<tm1.1Jhwa>/Hrh3<tm1.1Jhwa>	involves: C57BL/6 * C57BL/6NTac	MGI:5056081	hm	abnormal glucose homeostasis
Hrh3<tm1.1Jhwa>/Hrh3<tm1.1Jhwa>	involves: C57BL/6 * C57BL/6NTac	MGI:5056081	hm	decreased physiological sensitivity to xenobiotic
Hrh3<tm1.1Jhwa>/Hrh3<tm1.1Jhwa>	involves: C57BL/6 * C57BL/6NTac	MGI:5056081	hm	increased circulating glucose level
Hrh3<tm1Kot>/Hrh3<tm1Kot>	involves: 129X1/SvJ * C57BL/6N	MGI:3050800	hm	abnormal energy expenditure
Hrh3<tm1Kot>/Hrh3<tm1Kot>	involves: 129X1/SvJ * C57BL/6N	MGI:3050800	hm	decreased core body temperature
Hrh3<tm1Kot>/Hrh3<tm1Kot>	involves: 129X1/SvJ * C57BL/6N	MGI:3050800	hm	decreased oxygen consumption
Hrh3<tm1Kot>/Hrh3<tm1Kot>	involves: 129X1/SvJ * C57BL/6N	MGI:3050800	hm	hypoactivity
Hrh3<tm1Kot>/Hrh3<tm1Kot>	involves: 129X1/SvJ * C57BL/6N	MGI:3050800	hm	increased circulating insulin level
Hrh3<tm1Kot>/Hrh3<tm1Kot>	involves: 129X1/SvJ * C57BL/6N	MGI:3050800	hm	increased circulating leptin level
Hrh3<tm1Kot>/Hrh3<tm1Kot>	involves: 129X1/SvJ * C57BL/6N	MGI:3050800	hm	increased susceptibility to weight gain
Hrh3<tm1Kot>/Hrh3<tm1Kot>	involves: 129X1/SvJ * C57BL/6N	MGI:3050800	hm	increased total body fat amount
Hrh3<tm1Kot>/Hrh3<tm1Kot>	involves: 129X1/SvJ * C57BL/6N	MGI:3050800	hm	insulin resistance
Hrh3<tm1Kot>/Hrh3<tm1Kot>	involves: 129X1/SvJ * C57BL/6N	MGI:3050800	hm	polyphagia
Hrh3<tm1Twl>/Hrh3<tm1Twl>	B6.129X1-Hrh3<tm1Twl>	MGI:3775276	hm	abnormal blood-brain barrier function
Hrh3<tm1Twl>/Hrh3<tm1Twl>	B6.129X1-Hrh3<tm1Twl>	MGI:3775276	hm	increased susceptibility to experimental autoimmune encephalomyelitis
Hrh3<tm1Twl>/Hrh3<tm1Twl>	involves: 129P2/OlaHsd	MGI:3775272	hm	abnormal cardiovascular system physiology
Hrh3<tm1Twl>/Hrh3<tm1Twl>	involves: 129P2/OlaHsd	MGI:3775272	hm	abnormal synaptic norepinephrine release
Hrh3<tm1Twl>/Hrh3<tm1Twl>	involves: 129P2/OlaHsd	MGI:3775272	hm	immune system phenotype
Hrh3<tm1Twl>/Hrh3<tm1Twl>	involves: 129P2/OlaHsd * C57BL/6J	MGI:3607904	hm	abnormal anxiety-related response
Hrh3<tm1Twl>/Hrh3<tm1Twl>	involves: 129P2/OlaHsd * C57BL/6J	MGI:3607904	hm	abnormal circadian temperature homeostasis
Hrh3<tm1Twl>/Hrh3<tm1Twl>	involves: 129P2/OlaHsd * C57BL/6J	MGI:3607904	hm	abnormal hormone level
Hrh3<tm1Twl>/Hrh3<tm1Twl>	involves: 129P2/OlaHsd * C57BL/6J	MGI:3607904	hm	abnormal locomotor activation
Hrh3<tm1Twl>/Hrh3<tm1Twl>	involves: 129P2/OlaHsd * C57BL/6J	MGI:3607904	hm	abnormal nervous system physiology
Hrh3<tm1Twl>/Hrh3<tm1Twl>	involves: 129P2/OlaHsd * C57BL/6J	MGI:3607904	hm	abnormal spatial learning
Hrh3<tm1Twl>/Hrh3<tm1Twl>	involves: 129P2/OlaHsd * C57BL/6J	MGI:3607904	hm	decreased anxiety-related response
Hrh3<tm1Twl>/Hrh3<tm1Twl>	involves: 129P2/OlaHsd * C57BL/6J	MGI:3607904	hm	increased anxiety-related response
Il1rapl1<tm1.1Hesk>/Il1rapl1<tm1.1Hesk>	involves: C57BL/6	MGI:4414659	hm	abnormal cerebellar molecular layer
Il1rapl1<tm1.1Hesk>/Il1rapl1<tm1.1Hesk>	involves: C57BL/6	MGI:4414659	hm	abnormal CNS synaptic transmission
Il1rapl1<tm1.1Hesk>/Il1rapl1<tm1.1Hesk>	involves: C57BL/6	MGI:4414659	hm	abnormal inhibitory postsynaptic currents
Il1rapl1<tm1.1Hesk>/Il1rapl1<tm1.1Hesk>	involves: C57BL/6	MGI:4414659	hm	nervous system phenotype
Kcnq2<tm1Dgen>/Kcnq2<tm1Dgen>	B6.129P2-Kcnq2<tm1Dgen>/J	MGI:3830651	hm	abnormal afterhyperpolarization
Kcnq2<tm1Dgen>/Kcnq2<tm1Dgen>	involves: 129P2/OlaHsd * C57BL/6	MGI:3606652	hm	partial preweaning lethality
Kcnq2<tm1Hsa>/Kcnq2<tm1Hsa>	involves: 129P2/OlaHsd * C57BL/6	MGI:2672849	hm	atelectasis
Kcnq2<tm1Hsa>/Kcnq2<tm1Hsa>	involves: 129P2/OlaHsd * C57BL/6	MGI:2672849	hm	complete neonatal lethality
Kcnq2<tm1Hsa>/Kcnq2<tm1Hsa>	involves: 129P2/OlaHsd * C57BL/6	MGI:2672849	hm	nervous system phenotype
Lancl1<tm1.1Pfw>/Lancl1<tm1.1Pfw>	involves: 129 * C57BL/6	MGI:5646276	hm	abnormal mitochondrial physiology
Lancl1<tm1.1Pfw>/Lancl1<tm1.1Pfw>	involves: 129 * C57BL/6	MGI:5646276	hm	brain inflammation
Lancl1<tm1.1Pfw>/Lancl1<tm1.1Pfw>	involves: 129 * C57BL/6	MGI:5646276	hm	increased neuron apoptosis
Lancl1<tm1.1Pfw>/Lancl1<tm1.1Pfw>	involves: 129 * C57BL/6	MGI:5646276	hm	increased susceptibility to neuronal excitotoxicity
Lancl1<tm1.1Pfw>/Lancl1<tm1.1Pfw>	involves: 129 * C57BL/6	MGI:5646276	hm	neurodegeneration
Lancl1<tm1.1Pfw>/Lancl1<tm1.1Pfw>	involves: 129 * C57BL/6	MGI:5646276	hm	oxidative stress
Lgi1<tm1.1Ics>/Lgi1<tm1.1Ics>	involves: 129S2/SvPas * BALB/c * C57BL/6	MGI:5317116	hm	abnormal brain wave pattern
Lgi1<tm1.1Ics>/Lgi1<tm1.1Ics>	involves: 129S2/SvPas * BALB/c * C57BL/6	MGI:5317116	hm	abnormal cerebellar granule cell morphology
Lgi1<tm1.1Ics>/Lgi1<tm1.1Ics>	involves: 129S2/SvPas * BALB/c * C57BL/6	MGI:5317116	hm	abnormal cerebellum external granule cell layer morphology
Lgi1<tm1.1Ics>/Lgi1<tm1.1Ics>	involves: 129S2/SvPas * BALB/c * C57BL/6	MGI:5317116	hm	abnormal hippocampal mossy fiber morphology
Lgi1<tm1.1Ics>/Lgi1<tm1.1Ics>	involves: 129S2/SvPas * BALB/c * C57BL/6	MGI:5317116	hm	abnormal spike wave discharge
Lgi1<tm1.1Ics>/Lgi1<tm1.1Ics>	involves: 129S2/SvPas * BALB/c * C57BL/6	MGI:5317116	hm	akinesia
Lgi1<tm1.1Ics>/Lgi1<tm1.1Ics>	involves: 129S2/SvPas * BALB/c * C57BL/6	MGI:5317116	hm	aphagia
Lgi1<tm1.1Ics>/Lgi1<tm1.1Ics>	involves: 129S2/SvPas * BALB/c * C57BL/6	MGI:5317116	hm	complete postnatal lethality
Lgi1<tm1.1Ics>/Lgi1<tm1.1Ics>	involves: 129S2/SvPas * BALB/c * C57BL/6	MGI:5317116	hm	decreased body size
Lgi1<tm1.1Ics>/Lgi1<tm1.1Ics>	involves: 129S2/SvPas * BALB/c * C57BL/6	MGI:5317116	hm	decreased body weight
Lgi1<tm1.1Ics>/Lgi1<tm1.1Ics>	involves: 129S2/SvPas * BALB/c * C57BL/6	MGI:5317116	hm	decreased total body fat amount
Lgi1<tm1.1Ics>/Lgi1<tm1.1Ics>	involves: 129S2/SvPas * BALB/c * C57BL/6	MGI:5317116	hm	environmentally induced seizures
Lgi1<tm1.1Ics>/Lgi1<tm1.1Ics>	involves: 129S2/SvPas * BALB/c * C57BL/6	MGI:5317116	hm	Epilepsy, Familial Temporal Lobe, 1
Lgi1<tm1.1Ics>/Lgi1<tm1.1Ics>	involves: 129S2/SvPas * BALB/c * C57BL/6	MGI:5317116	hm	gliosis
Lgi1<tm1.1Ics>/Lgi1<tm1.1Ics>	involves: 129S2/SvPas * BALB/c * C57BL/6	MGI:5317116	hm	neurodegeneration
Lgi1<tm1.1Ics>/Lgi1<tm1.1Ics>	involves: 129S2/SvPas * BALB/c * C57BL/6	MGI:5317116	hm	postnatal growth retardation
Lgi1<tm1.1Ics>/Lgi1<tm1.1Ics>	involves: 129S2/SvPas * BALB/c * C57BL/6	MGI:5317116	hm	seizures
Lgi1<tm1.1Ics>/Lgi1<tm1.1Ics>	involves: 129S2/SvPas * BALB/c * C57BL/6	MGI:5317116	hm	tonic-clonic seizures
Lgi1<tm1Mafu>/Lgi1<tm1Mafu>	involves: 129S6/SvEvTac * C57BL/6	MGI:4437122	hm	abnormal glutamate-mediated receptor currents
Lgi1<tm1Mafu>/Lgi1<tm1Mafu>	involves: 129S6/SvEvTac * C57BL/6	MGI:4437122	hm	abnormal miniature excitatory postsynaptic currents
Lgi1<tm1Mafu>/Lgi1<tm1Mafu>	involves: 129S6/SvEvTac * C57BL/6	MGI:4437122	hm	Epilepsy, Familial Temporal Lobe, 1
Lgi1<tm1Mafu>/Lgi1<tm1Mafu>	involves: 129S6/SvEvTac * C57BL/6	MGI:4437122	hm	nervous system phenotype
Lgi1<tm1Mafu>/Lgi1<tm1Mafu>	involves: 129S6/SvEvTac * C57BL/6	MGI:4437122	hm	postnatal growth retardation
Lgi1<tm1Mafu>/Lgi1<tm1Mafu>	involves: 129S6/SvEvTac * C57BL/6	MGI:4437122	hm	premature death
Lgi1<tm1Mafu>/Lgi1<tm1Mafu>	involves: 129S6/SvEvTac * C57BL/6	MGI:4437122	hm	seizures
Lgi1<tm1Mafu>/Lgi1<tm1Mafu>	involves: 129S6/SvEvTac * C57BL/6	MGI:4437122	hm	tonic-clonic seizures
Lin7b<tm1Dsb>/Lin7b<tm1Dsb>	involves: 129X1/SvJ * C57BL/6J	MGI:3582547	hm	no abnormal phenotype detected
Mapk1<tm1.1Kuta>/Mapk1<tm1.1Kuta>	involves: 129P2/OlaHsd * C57BL/6 * C57BL/6J * FVB/N	MGI:3759809	hm	complete embryonic lethality during organogenesis
Mapk1<tm1Melo>/Mapk1<tm1Melo>	either: (involves: 129S2/SvPas * C57BL/6) or (involves: 129S2/SvPas * CD-1)	MGI:2683191	hm	abnormal developmental patterning
Mapk1<tm1Melo>/Mapk1<tm1Melo>	either: (involves: 129S2/SvPas * C57BL/6) or (involves: 129S2/SvPas * CD-1)	MGI:2683191	hm	abnormal polar trophectoderm morphology
Mapk1<tm1Melo>/Mapk1<tm1Melo>	either: (involves: 129S2/SvPas * C57BL/6) or (involves: 129S2/SvPas * CD-1)	MGI:2683191	hm	abnormal proximal-distal axis patterning
Mapk1<tm1Melo>/Mapk1<tm1Melo>	either: (involves: 129S2/SvPas * C57BL/6) or (involves: 129S2/SvPas * CD-1)	MGI:2683191	hm	abnormal rostral-caudal axis patterning
Mapk1<tm1Melo>/Mapk1<tm1Melo>	either: (involves: 129S2/SvPas * C57BL/6) or (involves: 129S2/SvPas * CD-1)	MGI:2683191	hm	abnormal trophoblast layer morphology
Mapk1<tm1Melo>/Mapk1<tm1Melo>	either: (involves: 129S2/SvPas * C57BL/6) or (involves: 129S2/SvPas * CD-1)	MGI:2683191	hm	abnormal visceral endoderm morphology
Mapk1<tm1Melo>/Mapk1<tm1Melo>	either: (involves: 129S2/SvPas * C57BL/6) or (involves: 129S2/SvPas * CD-1)	MGI:2683191	hm	absent ectoplacental cone
Mapk1<tm1Melo>/Mapk1<tm1Melo>	either: (involves: 129S2/SvPas * C57BL/6) or (involves: 129S2/SvPas * CD-1)	MGI:2683191	hm	absent extraembryonic ectoderm
Mapk1<tm1Melo>/Mapk1<tm1Melo>	either: (involves: 129S2/SvPas * C57BL/6) or (involves: 129S2/SvPas * CD-1)	MGI:2683191	hm	complete embryonic lethality between implantation and somite formation
Mapk1<tm1Melo>/Mapk1<tm1Melo>	either: (involves: 129S2/SvPas * C57BL/6) or (involves: 129S2/SvPas * CD-1)	MGI:2683191	hm	decreased embryo size
Mapk1<tm1Melo>/Mapk1<tm1Melo>	either: (involves: 129S2/SvPas * C57BL/6) or (involves: 129S2/SvPas * CD-1)	MGI:2683191	hm	disorganized extraembryonic tissue
Mapk1<tm1Moga>/Mapk1<tm1Moga>	involves: 129P2/OlaHsd * C57BL/6	MGI:3055901	hm	abnormal placenta development
Mapk1<tm1Moga>/Mapk1<tm1Moga>	involves: 129P2/OlaHsd * C57BL/6	MGI:3055901	hm	abnormal placental labyrinth vasculature morphology
Mapk1<tm1Moga>/Mapk1<tm1Moga>	involves: 129P2/OlaHsd * C57BL/6	MGI:3055901	hm	complete embryonic lethality during organogenesis
Mapk1<tm1Moga>/Mapk1<tm1Moga>	involves: 129P2/OlaHsd * C57BL/6	MGI:3055901	hm	embryonic growth retardation
Mapk1<tm1Moga>/Mapk1<tm1Moga>	involves: 129P2/OlaHsd * C57BL/6	MGI:3055901	hm	thin myocardium
Mapk1<tm1Moga>/Mapk1<tm1Moga>	involves: 129P2/OlaHsd * C57BL/6	MGI:3055901	hm	thin placenta labyrinth
Mapk1<tm2Hed>/Mapk1<tm2Hed>	involves: 129S1/Sv * 129X1/SvJ * C57BL/6	MGI:3687230	hm	complete prenatal lethality
Mapk1<tm2Moga>/Mapk1<tm2Moga>	involves: 129P2/OlaHsd * C57BL/6	MGI:3055922	hm	abnormal heart morphology
Mapk1<tm2Moga>/Mapk1<tm2Moga>	involves: 129P2/OlaHsd * C57BL/6	MGI:3055922	hm	abnormal placenta development
Mapk1<tm2Moga>/Mapk1<tm2Moga>	involves: 129P2/OlaHsd * C57BL/6	MGI:3055922	hm	abnormal placenta labyrinth morphology
Mapk1<tm2Moga>/Mapk1<tm2Moga>	involves: 129P2/OlaHsd * C57BL/6	MGI:3055922	hm	abnormal placenta vasculature
Mapk1<tm2Moga>/Mapk1<tm2Moga>	involves: 129P2/OlaHsd * C57BL/6	MGI:3055922	hm	complete embryonic lethality during organogenesis
Mapk1<tm2Moga>/Mapk1<tm2Moga>	involves: 129P2/OlaHsd * C57BL/6	MGI:3055922	hm	embryonic growth retardation
Matk<tm1Hua>/Matk<tm1Hua>	involves: 129P2/OlaHsd	MGI:2662583	hm	no abnormal phenotype detected
Matk<tm1Sor>/Matk<tm1Sor>	B6.129S4-Matk<tm1Sor>	MGI:3626226	hm	abnormal bone marrow cell morphology/development
Matk<tm1Sor>/Matk<tm1Sor>	B6.129S4-Matk<tm1Sor>	MGI:3626226	hm	abnormal hematopoietic system physiology
Matk<tm1Sor>/Matk<tm1Sor>	B6.129S4-Matk<tm1Sor>	MGI:3626226	hm	hematopoietic system phenotype
Matk<tm1Sor>/Matk<tm1Sor>	B6.129S4-Matk<tm1Sor>	MGI:3626226	hm	increased hematopoietic stem cell number
Matk<tm1Suda>/Matk<tm1Suda>	involves: C57BL/6 * CBA	MGI:2668017	hm	no abnormal phenotype detected
Mbd5<tm1.2Gxu>/Mbd5<tm1.2Gxu>	involves: 129S2/SvPas * C57BL/6J	MGI:5466592	hm	abnormal glucose homeostasis
Mbd5<tm1.2Gxu>/Mbd5<tm1.2Gxu>	involves: 129S2/SvPas * C57BL/6J	MGI:5466592	hm	cachexia
Mbd5<tm1.2Gxu>/Mbd5<tm1.2Gxu>	involves: 129S2/SvPas * C57BL/6J	MGI:5466592	hm	complete postnatal lethality
Mbd5<tm1.2Gxu>/Mbd5<tm1.2Gxu>	involves: 129S2/SvPas * C57BL/6J	MGI:5466592	hm	decreased body size
Mbd5<tm1.2Gxu>/Mbd5<tm1.2Gxu>	involves: 129S2/SvPas * C57BL/6J	MGI:5466592	hm	decreased body weight
Mbd5<tm1.2Gxu>/Mbd5<tm1.2Gxu>	involves: 129S2/SvPas * C57BL/6J	MGI:5466592	hm	decreased circulating glucose level
Mbd5<tm1.2Gxu>/Mbd5<tm1.2Gxu>	involves: 129S2/SvPas * C57BL/6J	MGI:5466592	hm	decreased circulating insulin level
Mbd5<tm1.2Gxu>/Mbd5<tm1.2Gxu>	involves: 129S2/SvPas * C57BL/6J	MGI:5466592	hm	decreased circulating insulin-like growth factor I level
Mbd5<tm1.2Gxu>/Mbd5<tm1.2Gxu>	involves: 129S2/SvPas * C57BL/6J	MGI:5466592	hm	decreased gonadal fat pad weight
Mbd5<tm1.2Gxu>/Mbd5<tm1.2Gxu>	involves: 129S2/SvPas * C57BL/6J	MGI:5466592	hm	decreased growth hormone level
Mbd5<tm1.2Gxu>/Mbd5<tm1.2Gxu>	involves: 129S2/SvPas * C57BL/6J	MGI:5466592	hm	decreased liver weight
Mbd5<tm1.2Gxu>/Mbd5<tm1.2Gxu>	involves: 129S2/SvPas * C57BL/6J	MGI:5466592	hm	decreased subcutaneous adipose tissue amount
Mbd5<tm1.2Gxu>/Mbd5<tm1.2Gxu>	involves: 129S2/SvPas * C57BL/6J	MGI:5466592	hm	hypoglycemia
Mbd5<tm1.2Gxu>/Mbd5<tm1.2Gxu>	involves: 129S2/SvPas * C57BL/6J	MGI:5466592	hm	improved glucose tolerance
Mbd5<tm1.2Gxu>/Mbd5<tm1.2Gxu>	involves: 129S2/SvPas * C57BL/6J	MGI:5466592	hm	increased brain weight
Mbd5<tm1.2Gxu>/Mbd5<tm1.2Gxu>	involves: 129S2/SvPas * C57BL/6J	MGI:5466592	hm	increased insulin sensitivity
Mbd5<tm1.2Gxu>/Mbd5<tm1.2Gxu>	involves: 129S2/SvPas * C57BL/6J	MGI:5466592	hm	postnatal growth retardation
Mbd5<tm1.2Gxu>/Mbd5<tm1.2Gxu>	involves: 129S2/SvPas * C57BL/6J	MGI:5466592	hm	small pituitary gland
Mgat5b<tm1.1Cfg>/Mgat5b<tm1.1Cfg>	involves: 129S6/SvEvTac	MGI:5615632	hm	abnormal bone marrow morphology
Mgat5b<tm1.1Cfg>/Mgat5b<tm1.1Cfg>	involves: 129S6/SvEvTac	MGI:5615632	hm	abnormal renal tubule epithelium morphology
Mgat5b<tm1.1Cfg>/Mgat5b<tm1.1Cfg>	involves: 129S6/SvEvTac	MGI:5615632	hm	decreased pre-B cell number
Mgat5b<tm1.1Cfg>/Mgat5b<tm1.1Cfg>	involves: 129S6/SvEvTac	MGI:5615632	hm	enhanced humoral immune response
Mgat5b<tm1.1Cfg>/Mgat5b<tm1.1Cfg>	involves: 129S6/SvEvTac	MGI:5615632	hm	increased circulating glucose level
Mgat5b<tm1.1Cfg>/Mgat5b<tm1.1Cfg>	involves: 129S6/SvEvTac	MGI:5615632	hm	increased IgG2b level
Mgat5b<tm1.1Cfg>/Mgat5b<tm1.1Cfg>	involves: 129S6/SvEvTac	MGI:5615632	hm	seminiferous tubule degeneration
Mgat5b<tm1.1Itl>/Mgat5b<tm1.1Itl>	involves: C57BL/6	MGI:5443813	hm	abnormal homeostasis
Mgat5b<tm1Nta>/Mgat5b<tm1Nta>	Not Specified	MGI:5523685	hm	astrocytosis
Mgat5b<tm1Nta>/Mgat5b<tm1Nta>	Not Specified	MGI:5523685	hm	brain inflammation
Mgat5b<tm1Nta>/Mgat5b<tm1Nta>	Not Specified	MGI:5523685	hm	decreased susceptibility to injury
Mgat5b<tm1Nta>/Mgat5b<tm1Nta>	Not Specified	MGI:5523685	hm	demyelination
Mgat5b<tm1Nta>/Mgat5b<tm1Nta>	Not Specified	MGI:5523685	hm	increased oligodendrocyte number
Mkl2<tm1.1Msp>/Mkl2<tm1.1Msp>	involves: 129	MGI:5438553	hm	abnormal aorta tunica media morphology
Mkl2<tm1.1Msp>/Mkl2<tm1.1Msp>	involves: 129	MGI:5438553	hm	abnormal artery morphology
Mkl2<tm1.1Msp>/Mkl2<tm1.1Msp>	involves: 129	MGI:5438553	hm	abnormal cell adhesion
Mkl2<tm1.1Msp>/Mkl2<tm1.1Msp>	involves: 129	MGI:5438553	hm	abnormal common carotid artery morphology
Mkl2<tm1.1Msp>/Mkl2<tm1.1Msp>	involves: 129	MGI:5438553	hm	abnormal descending thoracic aorta morphology
Mkl2<tm1.1Msp>/Mkl2<tm1.1Msp>	involves: 129	MGI:5438553	hm	abnormal outflow tract development
Mkl2<tm1.1Msp>/Mkl2<tm1.1Msp>	involves: 129	MGI:5438553	hm	abnormal third pharyngeal arch artery morphology
Mkl2<tm1.1Msp>/Mkl2<tm1.1Msp>	involves: 129	MGI:5438553	hm	aneurysm
Mkl2<tm1.1Msp>/Mkl2<tm1.1Msp>	involves: 129	MGI:5438553	hm	aorta dilation
Mkl2<tm1.1Msp>/Mkl2<tm1.1Msp>	involves: 129	MGI:5438553	hm	aortic aneurysm
Mkl2<tm1.1Msp>/Mkl2<tm1.1Msp>	involves: 129	MGI:5438553	hm	complete lethality throughout fetal growth and development
Mkl2<tm1.1Msp>/Mkl2<tm1.1Msp>	involves: 129	MGI:5438553	hm	dilated basilar artery
Mkl2<tm1.1Msp>/Mkl2<tm1.1Msp>	involves: 129	MGI:5438553	hm	internal hemorrhage
Mkl2<tm1.1Msp>/Mkl2<tm1.1Msp>	involves: 129	MGI:5438553	hm	liver hemorrhage
Mkl2<tm1.1Msp>/Mkl2<tm1.1Msp>	involves: 129	MGI:5438553	hm	lung hemorrhage
Mkl2<tm1Eno>/Mkl2<tm1Eno>	involves: 129S/SvEv * C57BL/6	MGI:3610554	hm	abnormal fourth pharyngeal arch artery morphology
Mkl2<tm1Eno>/Mkl2<tm1Eno>	involves: 129S/SvEv * C57BL/6	MGI:3610554	hm	abnormal heart and great vessel attachment
Mkl2<tm1Eno>/Mkl2<tm1Eno>	involves: 129S/SvEv * C57BL/6	MGI:3610554	hm	abnormal pharyngeal arch artery morphology
Mkl2<tm1Eno>/Mkl2<tm1Eno>	involves: 129S/SvEv * C57BL/6	MGI:3610554	hm	abnormal sixth pharyngeal arch artery morphology
Mkl2<tm1Eno>/Mkl2<tm1Eno>	involves: 129S/SvEv * C57BL/6	MGI:3610554	hm	complete lethality throughout fetal growth and development
Mkl2<tm1Eno>/Mkl2<tm1Eno>	involves: 129S/SvEv * C57BL/6	MGI:3610554	hm	double outlet right ventricle
Mkl2<tm1Eno>/Mkl2<tm1Eno>	involves: 129S/SvEv * C57BL/6	MGI:3610554	hm	hemorrhage
Mkl2<tm1Eno>/Mkl2<tm1Eno>	involves: 129S/SvEv * C57BL/6	MGI:3610554	hm	pericardial edema
Mkl2<tm1Eno>/Mkl2<tm1Eno>	involves: 129S/SvEv * C57BL/6	MGI:3610554	hm	perimembraneous ventricular septal defect
Mkl2<tm1Eno>/Mkl2<tm1Eno>	involves: 129S/SvEv * C57BL/6	MGI:3610554	hm	thin myocardium
Mkl2<tm1Eno>/Mkl2<tm1Eno>	involves: 129S/SvEv * C57BL/6	MGI:3610554	hm	vascular smooth muscle cell hypoplasia
Mmp17<tm1Dgen>/Mmp17<tm1Dgen>	involves: 129P2/OlaHsd * C57BL/6	MGI:3606603	hm	no abnormal phenotype detected
Mmp17<tm1Ski>/Mmp17<tm1Ski>	B6.Cg-Mmp17<tm1Ski>	MGI:3777287	hm	abnormal branching involved in ureteric bud morphogenesis
Mmp17<tm1Ski>/Mmp17<tm1Ski>	B6.Cg-Mmp17<tm1Ski>	MGI:3777287	hm	abnormal kidney collecting duct morphology
Mmp17<tm1Ski>/Mmp17<tm1Ski>	B6.Cg-Mmp17<tm1Ski>	MGI:3777287	hm	abnormal kidney papilla morphology
Mmp17<tm1Ski>/Mmp17<tm1Ski>	B6.Cg-Mmp17<tm1Ski>	MGI:3777287	hm	decreased fluid intake
Mmp17<tm1Ski>/Mmp17<tm1Ski>	B6.Cg-Mmp17<tm1Ski>	MGI:3777287	hm	growth/size/body region phenotype
Mmp17<tm1Ski>/Mmp17<tm1Ski>	B6.Cg-Mmp17<tm1Ski>	MGI:3777287	hm	hypodipsia
Mmp17<tm1Ski>/Mmp17<tm1Ski>	B6.Cg-Mmp17<tm1Ski>	MGI:3777287	hm	increased urine osmolality
Mmp17<tm1Ski>/Mmp17<tm1Ski>	B6.Cg-Mmp17<tm1Ski>	MGI:3777287	hm	mortality/aging
Mmp17<tm1Ski>/Mmp17<tm1Ski>	B6.Cg-Mmp17<tm1Ski>	MGI:3777287	hm	oliguria
Mmp17<tm1Ski>/Mmp17<tm1Ski>	B6.Cg-Mmp17<tm1Ski>	MGI:3777287	hm	reproductive system phenotype
Myt1l<tm1a(EUCOMM)Wtsi>/Myt1l<tm1a(EUCOMM)Wtsi>	Not Specified	MGI:5572057	hm	decreased mature B cell number
Nbea<Tg(GH1)240BNec>/Nbea<Tg(GH1)240BNec>	involves: C57BL/6 * SJL	MGI:4452361	hm	abnormal interscapular fat pad morphology
Nbea<Tg(GH1)240BNec>/Nbea<Tg(GH1)240BNec>	involves: C57BL/6 * SJL	MGI:4452361	hm	abnormal miniature endplate potential
Nbea<Tg(GH1)240BNec>/Nbea<Tg(GH1)240BNec>	involves: C57BL/6 * SJL	MGI:4452361	hm	complete neonatal lethality
Nbea<Tg(GH1)240BNec>/Nbea<Tg(GH1)240BNec>	involves: C57BL/6 * SJL	MGI:4452361	hm	cyanosis
Nbea<Tg(GH1)240BNec>/Nbea<Tg(GH1)240BNec>	involves: C57BL/6 * SJL	MGI:4452361	hm	impaired muscle contractility
Nbea<Tg(GH1)240BNec>/Nbea<Tg(GH1)240BNec>	involves: C57BL/6 * SJL	MGI:4452361	hm	nervous system phenotype
Nbea<Tg(GH1)240BNec>/Nbea<Tg(GH1)240BNec>	involves: C57BL/6 * SJL	MGI:4452361	hm	no spontaneous movement
Nbea<Tg(GH1)240BNec>/Nbea<Tg(GH1)240BNec>	involves: C57BL/6 * SJL	MGI:4452361	hm	unresponsive to tactile stimuli
Ncdn<tm1Afu>/Ncdn<tm1Afu>	involves: C57BL/6 * CBA	MGI:2681110	hm	abnormal embryogenesis/ development
Ncdn<tm1Afu>/Ncdn<tm1Afu>	involves: C57BL/6 * CBA	MGI:2681110	hm	complete embryonic lethality between implantation and somite formation
Pclo<tm1Sud>/Pclo<tm1Sud>	involves: 129S6/SvEvTac	MGI:3699729	hm	no abnormal phenotype detected
Pclo<tm3.2Sud>/Pclo<tm3.2Sud>	involves: 129S1/Sv * 129X1/SvJ	MGI:4442918	hm	abnormal synaptic vesicle number
Pclo<tm3.2Sud>/Pclo<tm3.2Sud>	involves: 129S1/Sv * 129X1/SvJ	MGI:4442918	hm	decreased body size
Pclo<tm3.2Sud>/Pclo<tm3.2Sud>	involves: 129S1/Sv * 129X1/SvJ	MGI:4442918	hm	decreased survivor rate
Pclo<tm3.2Sud>/Pclo<tm3.2Sud>	involves: 129S1/Sv * 129X1/SvJ	MGI:4442918	hm	increased synaptic depression
Pclo<tm3.2Sud>/Pclo<tm3.2Sud>	involves: 129S1/Sv * 129X1/SvJ	MGI:4442918	hm	nervous system phenotype
Pclo<tm3.2Sud>/Pclo<tm3.2Sud>	involves: 129S1/Sv * 129X1/SvJ	MGI:4442918	hm	premature death
Pclo<tm3.3Sud>/Pclo<tm3.3Sud>	involves: 129S1/Sv * 129X1/SvJ	MGI:4442919	hm	no abnormal phenotype detected
Plppr4<tm1Roni>/Plppr4<tm1Roni>	involves: 129P2/OlaHsd * C57BL/6	MGI:4431240	hm	abnormal excitatory postsynaptic potential
Plppr4<tm1Roni>/Plppr4<tm1Roni>	involves: 129P2/OlaHsd * C57BL/6	MGI:4431240	hm	abnormal miniature excitatory postsynaptic currents
Plppr4<tm1Roni>/Plppr4<tm1Roni>	involves: 129P2/OlaHsd * C57BL/6	MGI:4431240	hm	abnormal nervous system physiology
Plppr4<tm1Roni>/Plppr4<tm1Roni>	involves: 129P2/OlaHsd * C57BL/6	MGI:4431240	hm	decreased body weight
Plppr4<tm1Roni>/Plppr4<tm1Roni>	involves: 129P2/OlaHsd * C57BL/6	MGI:4431240	hm	decreased brain weight
Plppr4<tm1Roni>/Plppr4<tm1Roni>	involves: 129P2/OlaHsd * C57BL/6	MGI:4431240	hm	nervous system phenotype
Plppr4<tm1Roni>/Plppr4<tm1Roni>	involves: 129P2/OlaHsd * C57BL/6	MGI:4431240	hm	partial postnatal lethality
Plppr4<tm1Roni>/Plppr4<tm1Roni>	involves: 129P2/OlaHsd * C57BL/6	MGI:4431240	hm	seizures
Plppr4<tm1Roni>/Plppr4<tm1Roni>	involves: 129P2/OlaHsd * C57BL/6	MGI:4431240	hm	tonic-clonic seizures
Ppp3r1<tm2.1Grc>/Ppp3r1<tm2.1Grc>	Not Specified	MGI:3044039	hm	abnormal angiogenesis
Ppp3r1<tm2.1Grc>/Ppp3r1<tm2.1Grc>	Not Specified	MGI:3044039	hm	abnormal blood vessel morphology
Ppp3r1<tm2.1Grc>/Ppp3r1<tm2.1Grc>	Not Specified	MGI:3044039	hm	abnormal extraembryonic tissue morphology
Ppp3r1<tm2.1Grc>/Ppp3r1<tm2.1Grc>	Not Specified	MGI:3044039	hm	abnormal heart morphology
Ppp3r1<tm2.1Grc>/Ppp3r1<tm2.1Grc>	Not Specified	MGI:3044039	hm	abnormal visceral yolk sac morphology
Ppp3r1<tm2.1Grc>/Ppp3r1<tm2.1Grc>	Not Specified	MGI:3044039	hm	absent vitelline blood vessels
Ppp3r1<tm2.1Grc>/Ppp3r1<tm2.1Grc>	Not Specified	MGI:3044039	hm	complete embryonic lethality during organogenesis
Ppp3r1<tm2.1Grc>/Ppp3r1<tm2.1Grc>	Not Specified	MGI:3044039	hm	decreased embryo size
Ppp3r1<tm2.1Grc>/Ppp3r1<tm2.1Grc>	Not Specified	MGI:3044039	hm	disorganized yolk sac vascular plexus
Ppp3r1<tm2.1Grc>/Ppp3r1<tm2.1Grc>	Not Specified	MGI:3044039	hm	distended pericardium
Prkce<tm1Bai>/Prkce<tm1Bai>	Not Specified	MGI:3525294	hm	immune system phenotype
Prkce<tm1Bsca>/Prkce<tm1Bsca>	involves: 129P2/OlaHsd * C57BL/6	MGI:3618538	hm	abnormal uterus morphology
Prkce<tm1Bsca>/Prkce<tm1Bsca>	involves: 129P2/OlaHsd * C57BL/6	MGI:3618538	hm	decreased body size
Prkce<tm1Bsca>/Prkce<tm1Bsca>	involves: 129P2/OlaHsd * C57BL/6	MGI:3618538	hm	decreased circulating interleukin-1 beta level
Prkce<tm1Bsca>/Prkce<tm1Bsca>	involves: 129P2/OlaHsd * C57BL/6	MGI:3618538	hm	decreased circulating tumor necrosis factor level
Prkce<tm1Bsca>/Prkce<tm1Bsca>	involves: 129P2/OlaHsd * C57BL/6	MGI:3618538	hm	decreased macrophage apoptosis
Prkce<tm1Bsca>/Prkce<tm1Bsca>	involves: 129P2/OlaHsd * C57BL/6	MGI:3618538	hm	decreased macrophage nitric oxide production
Prkce<tm1Bsca>/Prkce<tm1Bsca>	involves: 129P2/OlaHsd * C57BL/6	MGI:3618538	hm	decreased T cell proliferation
Prkce<tm1Bsca>/Prkce<tm1Bsca>	involves: 129P2/OlaHsd * C57BL/6	MGI:3618538	hm	decreased total body fat amount
Prkce<tm1Bsca>/Prkce<tm1Bsca>	involves: 129P2/OlaHsd * C57BL/6	MGI:3618538	hm	dilated uterus
Prkce<tm1Bsca>/Prkce<tm1Bsca>	involves: 129P2/OlaHsd * C57BL/6	MGI:3618538	hm	increased myocardial infarction size
Prkce<tm1Bsca>/Prkce<tm1Bsca>	involves: 129P2/OlaHsd * C57BL/6	MGI:3618538	hm	increased susceptibility to bacterial infection
Prkce<tm1Bsca>/Prkce<tm1Bsca>	involves: 129P2/OlaHsd * C57BL/6	MGI:3618538	hm	reduced female fertility
Prkce<tm1Ltg>/Prkce<tm1Ltg>	involves: 129P2/OlaHsd * FVB/N	MGI:2680170	hm	decreased tumor necrosis factor secretion
Scn2a1<tm1Mml>/Scn2a1<tm1Mml>	involves: 129S1/Sv * 129X1/SvJ * C57BL/6J	MGI:2181757	hm	abnormal brainstem morphology
Scn2a1<tm1Mml>/Scn2a1<tm1Mml>	involves: 129S1/Sv * 129X1/SvJ * C57BL/6J	MGI:2181757	hm	abnormal hemoglobin
Scn2a1<tm1Mml>/Scn2a1<tm1Mml>	involves: 129S1/Sv * 129X1/SvJ * C57BL/6J	MGI:2181757	hm	abnormal nervous system electrophysiology
Scn2a1<tm1Mml>/Scn2a1<tm1Mml>	involves: 129S1/Sv * 129X1/SvJ * C57BL/6J	MGI:2181757	hm	absent gastric milk in neonates
Scn2a1<tm1Mml>/Scn2a1<tm1Mml>	involves: 129S1/Sv * 129X1/SvJ * C57BL/6J	MGI:2181757	hm	complete postnatal lethality
Scn2a1<tm1Mml>/Scn2a1<tm1Mml>	involves: 129S1/Sv * 129X1/SvJ * C57BL/6J	MGI:2181757	hm	cyanosis
Scn2a1<tm1Mml>/Scn2a1<tm1Mml>	involves: 129S1/Sv * 129X1/SvJ * C57BL/6J	MGI:2181757	hm	hypoxia
Scn2a1<tm1Mml>/Scn2a1<tm1Mml>	involves: 129S1/Sv * 129X1/SvJ * C57BL/6J	MGI:2181757	hm	respiratory distress
Scn2a1<tm1Mml>/Scn2a1<tm1Mml>	involves: 129S1/Sv * 129X1/SvJ * C57BL/6J	MGI:2181757	hm	weight loss
Slc12a5<tm1Tjj>/Slc12a5<tm1Tjj>	either: 129X1/SvJ or (involves: 129X1/SvJ * C57BL/6) or (involves: 129X1/SvJ * NMRI)	MGI:3036536	hm	abnormal abdominal wall morphology
Slc12a5<tm1Tjj>/Slc12a5<tm1Tjj>	either: 129X1/SvJ or (involves: 129X1/SvJ * C57BL/6) or (involves: 129X1/SvJ * NMRI)	MGI:3036536	hm	abnormal action potential
Slc12a5<tm1Tjj>/Slc12a5<tm1Tjj>	either: 129X1/SvJ or (involves: 129X1/SvJ * C57BL/6) or (involves: 129X1/SvJ * NMRI)	MGI:3036536	hm	abnormal central pattern generator function
Slc12a5<tm1Tjj>/Slc12a5<tm1Tjj>	either: 129X1/SvJ or (involves: 129X1/SvJ * C57BL/6) or (involves: 129X1/SvJ * NMRI)	MGI:3036536	hm	abnormal motor capabilities/coordination/movement
Slc12a5<tm1Tjj>/Slc12a5<tm1Tjj>	either: 129X1/SvJ or (involves: 129X1/SvJ * C57BL/6) or (involves: 129X1/SvJ * NMRI)	MGI:3036536	hm	abnormal nervous system electrophysiology
Slc12a5<tm1Tjj>/Slc12a5<tm1Tjj>	either: 129X1/SvJ or (involves: 129X1/SvJ * C57BL/6) or (involves: 129X1/SvJ * NMRI)	MGI:3036536	hm	abnormal somatic nervous system physiology
Slc12a5<tm1Tjj>/Slc12a5<tm1Tjj>	either: 129X1/SvJ or (involves: 129X1/SvJ * C57BL/6) or (involves: 129X1/SvJ * NMRI)	MGI:3036536	hm	abnormal touch/ nociception
Slc12a5<tm1Tjj>/Slc12a5<tm1Tjj>	either: 129X1/SvJ or (involves: 129X1/SvJ * C57BL/6) or (involves: 129X1/SvJ * NMRI)	MGI:3036536	hm	akinesia
Slc12a5<tm1Tjj>/Slc12a5<tm1Tjj>	either: 129X1/SvJ or (involves: 129X1/SvJ * C57BL/6) or (involves: 129X1/SvJ * NMRI)	MGI:3036536	hm	atelectasis
Slc12a5<tm1Tjj>/Slc12a5<tm1Tjj>	either: 129X1/SvJ or (involves: 129X1/SvJ * C57BL/6) or (involves: 129X1/SvJ * NMRI)	MGI:3036536	hm	complete neonatal lethality
Slc12a5<tm1Tjj>/Slc12a5<tm1Tjj>	either: 129X1/SvJ or (involves: 129X1/SvJ * C57BL/6) or (involves: 129X1/SvJ * NMRI)	MGI:3036536	hm	omphalocele
Slc12a5<tm1Tjj>/Slc12a5<tm1Tjj>	either: 129X1/SvJ or (involves: 129X1/SvJ * C57BL/6) or (involves: 129X1/SvJ * NMRI)	MGI:3036536	hm	respiratory failure
Slc12a5<tm1Tjj>/Slc12a5<tm1Tjj>	either: 129X1/SvJ or (involves: 129X1/SvJ * C57BL/6) or (involves: 129X1/SvJ * NMRI)	MGI:3036536	hm	trunk curl
Slc12a5<tm2Hsav>/Slc12a5<tm2Hsav>	involves: 129S1/Sv * 129X1/SvJ * C57BL/6J	MGI:5638536	hm	abnormal dendritic spine morphology
Slc12a5<tm2Hsav>/Slc12a5<tm2Hsav>	involves: 129S1/Sv * 129X1/SvJ * C57BL/6J	MGI:5638536	hm	abnormal miniature excitatory postsynaptic currents
Slc12a5<tm2Hsav>/Slc12a5<tm2Hsav>	involves: 129S1/Sv * 129X1/SvJ * C57BL/6J	MGI:5638536	hm	abnormal synapse morphology
Wasf1<tm1Jsco>/Wasf1<tm1Jsco>	involves: 129X1/SvJ * C57BL/6	MGI:2451314	hm	abnormal CNS synaptic transmission
Wasf1<tm1Jsco>/Wasf1<tm1Jsco>	involves: 129X1/SvJ * C57BL/6	MGI:2451314	hm	abnormal excitatory postsynaptic potential
Wasf1<tm1Jsco>/Wasf1<tm1Jsco>	involves: 129X1/SvJ * C57BL/6	MGI:2451314	hm	abnormal neuron morphology
Wasf1<tm1Jsco>/Wasf1<tm1Jsco>	involves: 129X1/SvJ * C57BL/6	MGI:2451314	hm	abnormal neuron physiology
Wasf1<tm1Jsco>/Wasf1<tm1Jsco>	involves: 129X1/SvJ * C57BL/6	MGI:2451314	hm	abnormal NMDA-mediated synaptic currents
Wasf1<tm1Jsco>/Wasf1<tm1Jsco>	involves: 129X1/SvJ * C57BL/6	MGI:2451314	hm	abnormal object recognition memory
Wasf1<tm1Jsco>/Wasf1<tm1Jsco>	involves: 129X1/SvJ * C57BL/6	MGI:2451314	hm	abnormal spatial learning
Wasf1<tm1Jsco>/Wasf1<tm1Jsco>	involves: 129X1/SvJ * C57BL/6	MGI:2451314	hm	decreased anxiety-related response
Wasf1<tm1Jsco>/Wasf1<tm1Jsco>	involves: 129X1/SvJ * C57BL/6	MGI:2451314	hm	decreased body weight
Wasf1<tm1Jsco>/Wasf1<tm1Jsco>	involves: 129X1/SvJ * C57BL/6	MGI:2451314	hm	enhanced long term potentiation
Wasf1<tm1Jsco>/Wasf1<tm1Jsco>	involves: 129X1/SvJ * C57BL/6	MGI:2451314	hm	impaired balance
Wasf1<tm1Jsco>/Wasf1<tm1Jsco>	involves: 129X1/SvJ * C57BL/6	MGI:2451314	hm	impaired coordination
Wasf1<tm1Jsco>/Wasf1<tm1Jsco>	involves: 129X1/SvJ * C57BL/6	MGI:2451314	hm	postnatal lethality
Wasf1<tm1Jsco>/Wasf1<tm1Jsco>	involves: 129X1/SvJ * C57BL/6	MGI:2451314	hm	reduced long term depression
Wdr13<tm1Kuma>/Wdr13<tm1Kuma>	involves: 129S1/Sv * 129X1/SvJ * CD-1	MGI:5694718	hm	increased body weight
Wdr13<tm1Kuma>/Wdr13<tm1Kuma>	involves: 129S1/Sv * 129X1/SvJ * CD-1	MGI:5694718	hm	increased gonadal fat pad weight
Wdr13<tm1Kuma>/Wdr13<tm1Kuma>	involves: 129S1/Sv * 129X1/SvJ * CD-1	MGI:5694718	hm	increased pancreas weight
Wdr13<tm1Kuma>/Wdr13<tm1Kuma>	involves: 129S1/Sv * 129X1/SvJ * CD-1	MGI:5694718	hm	increased white fat cell size
Wdr13<tm1Kuma>/Wdr13<tm1Kuma>	involves: 129S1/Sv * 129X1/SvJ * CD-1	MGI:5694718	hm	reproductive system phenotype

## Sheet: 35_Oligodendrocytes
Genotype symbol	Genotype Background	Genotype Primary Identifier	Genotype Zygosity	Ontology Annotation						MP term	p-value (Bonferroni 0.05)	Genotype	MP Ontology Term
Adamts4<tm1.1Boer>/Adamts4<tm1.1Boer>	involves: 129S1/Sv * 129X1/SvJ * BALB/cJ * C57BL/6J	MGI:5009126	hm	no abnormal phenotype detected						abnormal myelination	9.54313e-09	MGI:2450119,MGI:2450121,MGI:2450143,MGI:2669665,MGI:3043019,MGI:3522609,MGI:3621926,MGI:3718117,MGI:4355931,MGI:4355932	MP:0000920
Adamts4<tm1.1Eam>/Adamts4<tm1.1Eam>	involves: 129S5/SvEvBrd	MGI:3578014	hm	no abnormal phenotype detected						abnormal axon morphology	0.000414059	MGI:2182957,MGI:2450121,MGI:2450122,MGI:3808698,MGI:4355931,MGI:4355932,MGI:4840025	MP:0005404
Adamts4<tm1.1Lex>/Adamts4<tm1.1Lex>	involves: 129S5/SvEvBrd * C57BL/6	MGI:3710664	hm	skeleton phenotype						abnormal nervous system physiology	0.00416662	MGI:2182957,MGI:2450119,MGI:2450121,MGI:2450143,MGI:2669665,MGI:3043019,MGI:3051754,MGI:3522609,MGI:3606458,MGI:3621926,MGI:3718117,MGI:3808611,MGI:3808698,MGI:4355931,MGI:4355932	MP:0003633
Adamts4<tm1Dgen>/Adamts4<tm1Dgen>	involves: 129P2/OlaHsd * C57BL/6	MGI:3606458	hm	impaired coordination						absent strial basal cell tight junctions	0.00624904	MGI:2450122,MGI:3055550	MP:0004464
Adamts4<tm1Dgen>/Adamts4<tm1Dgen>	involves: 129P2/OlaHsd * C57BL/6	MGI:3606458	hm	increased susceptibility to pharmacologically induced seizures						nervous system phenotype	0.00724874	MGI:2182957,MGI:2450119,MGI:2450121,MGI:2450122,MGI:2450143,MGI:2669665,MGI:3043019,MGI:3051754,MGI:3522609,MGI:3606458,MGI:3613509,MGI:3621926,MGI:3718117,MGI:3808611,MGI:3808698,MGI:4355931,MGI:4355932,MGI:4420946,MGI:4818645,MGI:4840025,MGI:5007491,MGI:5438566,MGI:5467289,MGI:5522567,MGI:5556058,MGI:5693602,MGI:5697649	MP:0003631
Adamts4<tm1Dqp>/Adamts4<tm1Dqp>	involves: 129X1/SvJ * C57BL/6J	MGI:5007491	hm	abnormal Purkinje cell morphology						abnormal neurite morphology	0.0211703	MGI:2182957,MGI:2450121,MGI:2450122,MGI:3808698,MGI:4355931,MGI:4355932,MGI:4840025	MP:0008415
Adamts4<tm1Dqp>/Adamts4<tm1Dqp>	involves: 129X1/SvJ * C57BL/6J	MGI:5007491	hm	gliosis						abnormal nerve conduction	0.0228528	MGI:2450119,MGI:2450143,MGI:3522609,MGI:3808611	MP:0005403
Atat1<tm1.2Phep>/Atat1<tm1.2Phep>	involves: 129P2/OlaHsd * BALB/cJ * C57BL/6J	MGI:5549970	hm	abnormal cell morphology
Atat1<tm1.2Phep>/Atat1<tm1.2Phep>	involves: 129P2/OlaHsd * BALB/cJ * C57BL/6J	MGI:5549970	hm	abnormal male germ cell apoptosis
Atat1<tm1.2Phep>/Atat1<tm1.2Phep>	involves: 129P2/OlaHsd * BALB/cJ * C57BL/6J	MGI:5549970	hm	abnormal sperm annulus morphology
Atat1<tm1.2Phep>/Atat1<tm1.2Phep>	involves: 129P2/OlaHsd * BALB/cJ * C57BL/6J	MGI:5549970	hm	asthenozoospermia
Atat1<tm1.2Phep>/Atat1<tm1.2Phep>	involves: 129P2/OlaHsd * BALB/cJ * C57BL/6J	MGI:5549970	hm	behavior/neurological phenotype
Atat1<tm1.2Phep>/Atat1<tm1.2Phep>	involves: 129P2/OlaHsd * BALB/cJ * C57BL/6J	MGI:5549970	hm	decreased epididymis weight
Atat1<tm1.2Phep>/Atat1<tm1.2Phep>	involves: 129P2/OlaHsd * BALB/cJ * C57BL/6J	MGI:5549970	hm	decreased litter size
Atat1<tm1.2Phep>/Atat1<tm1.2Phep>	involves: 129P2/OlaHsd * BALB/cJ * C57BL/6J	MGI:5549970	hm	decreased testis weight
Atat1<tm1.2Phep>/Atat1<tm1.2Phep>	involves: 129P2/OlaHsd * BALB/cJ * C57BL/6J	MGI:5549970	hm	hematopoietic system phenotype
Atat1<tm1.2Phep>/Atat1<tm1.2Phep>	involves: 129P2/OlaHsd * BALB/cJ * C57BL/6J	MGI:5549970	hm	increased thigmotaxis
Atat1<tm1.2Phep>/Atat1<tm1.2Phep>	involves: 129P2/OlaHsd * BALB/cJ * C57BL/6J	MGI:5549970	hm	integument phenotype
Atat1<tm1.2Phep>/Atat1<tm1.2Phep>	involves: 129P2/OlaHsd * BALB/cJ * C57BL/6J	MGI:5549970	hm	mortality/aging
Atat1<tm1.2Phep>/Atat1<tm1.2Phep>	involves: 129P2/OlaHsd * BALB/cJ * C57BL/6J	MGI:5549970	hm	oligozoospermia
Atat1<tm1.2Phep>/Atat1<tm1.2Phep>	involves: 129P2/OlaHsd * BALB/cJ * C57BL/6J	MGI:5549970	hm	reduced male fertility
Atat1<tm1.2Phep>/Atat1<tm1.2Phep>	involves: 129P2/OlaHsd * BALB/cJ * C57BL/6J	MGI:5549970	hm	short sperm flagellum
Atat1<tm1.2Phep>/Atat1<tm1.2Phep>	involves: 129P2/OlaHsd * BALB/cJ * C57BL/6J	MGI:5549970	hm	teratozoospermia
Atat1<tm1(KOMP)Vlcg>/Atat1<tm1(KOMP)Vlcg>	involves: C57BL/6 * C57BL/6NTac	MGI:5522567	hm	abnormal cell physiology
Atat1<tm1(KOMP)Vlcg>/Atat1<tm1(KOMP)Vlcg>	involves: C57BL/6 * C57BL/6NTac	MGI:5522567	hm	abnormal dentate gyrus morphology
Atat1<tm1(KOMP)Vlcg>/Atat1<tm1(KOMP)Vlcg>	involves: C57BL/6 * C57BL/6NTac	MGI:5522567	hm	dilated lateral ventricles
Cldn11<tm1Ral>/Cldn11<tm1Ral>	Not Specified	MGI:2450122	hm	abnormal auditory brainstem response waveform shape
Cldn11<tm1Ral>/Cldn11<tm1Ral>	Not Specified	MGI:2450122	hm	abnormal distortion product otoacoustic emission
Cldn11<tm1Ral>/Cldn11<tm1Ral>	Not Specified	MGI:2450122	hm	abnormal grip strength
Cldn11<tm1Ral>/Cldn11<tm1Ral>	Not Specified	MGI:2450122	hm	abnormal myelin sheath morphology
Cldn11<tm1Ral>/Cldn11<tm1Ral>	Not Specified	MGI:2450122	hm	abnormal seminiferous tubule morphology
Cldn11<tm1Ral>/Cldn11<tm1Ral>	Not Specified	MGI:2450122	hm	abnormal Sertoli cell morphology
Cldn11<tm1Ral>/Cldn11<tm1Ral>	Not Specified	MGI:2450122	hm	abnormal spermatogenesis
Cldn11<tm1Ral>/Cldn11<tm1Ral>	Not Specified	MGI:2450122	hm	abnormal visual evoked potential
Cldn11<tm1Ral>/Cldn11<tm1Ral>	Not Specified	MGI:2450122	hm	absent strial basal cell tight junctions
Cldn11<tm1Ral>/Cldn11<tm1Ral>	Not Specified	MGI:2450122	hm	azoospermia
Cldn11<tm1Ral>/Cldn11<tm1Ral>	Not Specified	MGI:2450122	hm	cochlear outer hair cell degeneration
Cldn11<tm1Ral>/Cldn11<tm1Ral>	Not Specified	MGI:2450122	hm	deafness
Cldn11<tm1Ral>/Cldn11<tm1Ral>	Not Specified	MGI:2450122	hm	decreased endocochlear potential
Cldn11<tm1Ral>/Cldn11<tm1Ral>	Not Specified	MGI:2450122	hm	impaired coordination
Cldn11<tm1Ral>/Cldn11<tm1Ral>	Not Specified	MGI:2450122	hm	increased or absent threshold for auditory brainstem response
Cldn11<tm1Ral>/Cldn11<tm1Ral>	Not Specified	MGI:2450122	hm	male infertility
Cldn11<tm1Ral>/Cldn11<tm1Ral>	Not Specified	MGI:2450122	hm	nervous system phenotype
Cldn11<tm1Ral>/Cldn11<tm1Ral>	Not Specified	MGI:2450122	hm	small testis
Cldn11<tm1Ral>/Cldn11<tm1Ral>	Not Specified	MGI:2450122	hm	tremors
Cldn11<tm1Sts>/Cldn11<tm1Sts>	involves: 129S4/SvJae * C57BL/6	MGI:3055550	hm	abnormal stria vascularis morphology
Cldn11<tm1Sts>/Cldn11<tm1Sts>	involves: 129S4/SvJae * C57BL/6	MGI:3055550	hm	absent strial basal cell tight junctions
Cldn11<tm1Sts>/Cldn11<tm1Sts>	involves: 129S4/SvJae * C57BL/6	MGI:3055550	hm	decreased endocochlear potential
Cldn11<tm1Sts>/Cldn11<tm1Sts>	involves: 129S4/SvJae * C57BL/6	MGI:3055550	hm	increased or absent threshold for auditory brainstem response
Cldn11<tm1Sts>/Cldn11<tm1Sts>	involves: 129S4/SvJae * C57BL/6	MGI:3055550	hm	male infertility
Cnp<tm1(cre)Kan>/Cnp<tm1(cre)Kan>	involves: 129S1/Sv * 129X1/SvJ * C57BL/6J	MGI:3051754	hm	abnormal gait
Cnp<tm1(cre)Kan>/Cnp<tm1(cre)Kan>	involves: 129S1/Sv * 129X1/SvJ * C57BL/6J	MGI:3051754	hm	ataxia
Cnp<tm1(cre)Kan>/Cnp<tm1(cre)Kan>	involves: 129S1/Sv * 129X1/SvJ * C57BL/6J	MGI:3051754	hm	axon degeneration
Cnp<tm1(cre)Kan>/Cnp<tm1(cre)Kan>	involves: 129S1/Sv * 129X1/SvJ * C57BL/6J	MGI:3051754	hm	convulsive seizures
Cnp<tm1(cre)Kan>/Cnp<tm1(cre)Kan>	involves: 129S1/Sv * 129X1/SvJ * C57BL/6J	MGI:3051754	hm	gliosis
Cnp<tm1(cre)Kan>/Cnp<tm1(cre)Kan>	involves: 129S1/Sv * 129X1/SvJ * C57BL/6J	MGI:3051754	hm	hindlimb paralysis
Cnp<tm1(cre)Kan>/Cnp<tm1(cre)Kan>	involves: 129S1/Sv * 129X1/SvJ * C57BL/6J	MGI:3051754	hm	kyphosis
Cnp<tm1(cre)Kan>/Cnp<tm1(cre)Kan>	involves: 129S1/Sv * 129X1/SvJ * C57BL/6J	MGI:3051754	hm	muscle weakness
Cnp<tm1(cre)Kan>/Cnp<tm1(cre)Kan>	involves: 129S1/Sv * 129X1/SvJ * C57BL/6J	MGI:3051754	hm	premature death
Cnp<tm1(cre)Kan>/Cnp<tm1(cre)Kan>	involves: 129S1/Sv * 129X1/SvJ * C57BL/6J	MGI:3051754	hm	weight loss
Ddr1<tm1Wfv>/Ddr1<tm1Wfv>	either: (involves: (129S1/Sv * 129X1/SvJ) or (involves: 129S1/Sv * 129X1/SvJ * ICR) or (involves: 129S1/Sv * 129X1/SvJ * C57BL/6)	MGI:3038250	hm	abnormal bone mineralization
Ddr1<tm1Wfv>/Ddr1<tm1Wfv>	either: (involves: (129S1/Sv * 129X1/SvJ) or (involves: 129S1/Sv * 129X1/SvJ * ICR) or (involves: 129S1/Sv * 129X1/SvJ * C57BL/6)	MGI:3038250	hm	abnormal lactation
Ddr1<tm1Wfv>/Ddr1<tm1Wfv>	either: (involves: (129S1/Sv * 129X1/SvJ) or (involves: 129S1/Sv * 129X1/SvJ * ICR) or (involves: 129S1/Sv * 129X1/SvJ * C57BL/6)	MGI:3038250	hm	abnormal mammary gland development
Ddr1<tm1Wfv>/Ddr1<tm1Wfv>	either: (involves: (129S1/Sv * 129X1/SvJ) or (involves: 129S1/Sv * 129X1/SvJ * ICR) or (involves: 129S1/Sv * 129X1/SvJ * C57BL/6)	MGI:3038250	hm	abnormal mammary gland duct morphology
Ddr1<tm1Wfv>/Ddr1<tm1Wfv>	either: (involves: (129S1/Sv * 129X1/SvJ) or (involves: 129S1/Sv * 129X1/SvJ * ICR) or (involves: 129S1/Sv * 129X1/SvJ * C57BL/6)	MGI:3038250	hm	abnormal outer ear morphology
Ddr1<tm1Wfv>/Ddr1<tm1Wfv>	either: (involves: (129S1/Sv * 129X1/SvJ) or (involves: 129S1/Sv * 129X1/SvJ * ICR) or (involves: 129S1/Sv * 129X1/SvJ * C57BL/6)	MGI:3038250	hm	failure of embryo implantation
Ddr1<tm1Wfv>/Ddr1<tm1Wfv>	either: (involves: (129S1/Sv * 129X1/SvJ) or (involves: 129S1/Sv * 129X1/SvJ * ICR) or (involves: 129S1/Sv * 129X1/SvJ * C57BL/6)	MGI:3038250	hm	increased mammary gland epithelial cell proliferation
Ddr1<tm1Wfv>/Ddr1<tm1Wfv>	either: (involves: (129S1/Sv * 129X1/SvJ) or (involves: 129S1/Sv * 129X1/SvJ * ICR) or (involves: 129S1/Sv * 129X1/SvJ * C57BL/6)	MGI:3038250	hm	postnatal growth retardation
Ddr1<tm1Wfv>/Ddr1<tm1Wfv>	involves: 129S1/Sv * 129X1/SvJ * C57BL/6	MGI:3767990	hm	abnormal cranium morphology
Ddr1<tm1Wfv>/Ddr1<tm1Wfv>	involves: 129S1/Sv * 129X1/SvJ * ICR	MGI:5432776	hm	abnormal podocyte slit diaphragm morphology
Ddr1<tm1Wfv>/Ddr1<tm1Wfv>	involves: 129S1/Sv * 129X1/SvJ * ICR	MGI:5432776	hm	abnormal renal tubule epithelium morphology
Ddr1<tm1Wfv>/Ddr1<tm1Wfv>	involves: 129S1/Sv * 129X1/SvJ * ICR	MGI:5432776	hm	erythrocyturia
Ddr1<tm1Wfv>/Ddr1<tm1Wfv>	involves: 129S1/Sv * 129X1/SvJ * ICR	MGI:5432776	hm	homeostasis/metabolism phenotype
Ddr1<tm1Wfv>/Ddr1<tm1Wfv>	involves: 129S1/Sv * 129X1/SvJ * ICR	MGI:5432776	hm	increased renal glomerulus basement membrane thickness
Ddr1<tm1Wfv>/Ddr1<tm1Wfv>	involves: 129S1/Sv * 129X1/SvJ * ICR	MGI:5432776	hm	increased urine protein level
Ddr1<tm1Wfv>/Ddr1<tm1Wfv>	involves: 129S1/Sv * 129X1/SvJ * ICR	MGI:5432776	hm	renal/urinary system phenotype
Dusp10<tm1Flv>/Dusp10<tm1Flv>	129S6/SvEvTac	MGI:3052357	hm	abnormal adaptive immunity
Dusp10<tm1Flv>/Dusp10<tm1Flv>	129S6/SvEvTac	MGI:3052357	hm	abnormal cytokine secretion
Dusp10<tm1Flv>/Dusp10<tm1Flv>	129S6/SvEvTac	MGI:3052357	hm	abnormal interleukin secretion
Dusp10<tm1Flv>/Dusp10<tm1Flv>	129S6/SvEvTac	MGI:3052357	hm	decreased susceptibility to experimental autoimmune encephalomyelitis
Dusp10<tm1Flv>/Dusp10<tm1Flv>	129S6/SvEvTac	MGI:3052357	hm	decreased T cell proliferation
Dusp10<tm1Flv>/Dusp10<tm1Flv>	129S6/SvEvTac	MGI:3052357	hm	increased activated T cell number
Dusp10<tm1Flv>/Dusp10<tm1Flv>	129S6/SvEvTac	MGI:3052357	hm	increased interferon-gamma secretion
Dusp10<tm1Flv>/Dusp10<tm1Flv>	129S6/SvEvTac	MGI:3052357	hm	increased susceptibility to type I hypersensitivity reaction
Dusp10<tm1Flv>/Dusp10<tm1Flv>	129S6/SvEvTac	MGI:3052357	hm	increased tumor necrosis factor secretion
Gal3st1<tm1Kho>/Gal3st1<tm1Kho>	involves: 129P2/OlaHsd	MGI:2450121	hm	abnormal axon morphology
Gal3st1<tm1Kho>/Gal3st1<tm1Kho>	involves: 129P2/OlaHsd	MGI:2450121	hm	abnormal brain morphology
Gal3st1<tm1Kho>/Gal3st1<tm1Kho>	involves: 129P2/OlaHsd	MGI:2450121	hm	abnormal involuntary movement
Gal3st1<tm1Kho>/Gal3st1<tm1Kho>	involves: 129P2/OlaHsd	MGI:2450121	hm	abnormal myelination
Gal3st1<tm1Kho>/Gal3st1<tm1Kho>	involves: 129P2/OlaHsd	MGI:2450121	hm	abnormal paranode morphology
Gal3st1<tm1Kho>/Gal3st1<tm1Kho>	involves: 129P2/OlaHsd	MGI:2450121	hm	abnormal spermatogonia proliferation
Gal3st1<tm1Kho>/Gal3st1<tm1Kho>	involves: 129P2/OlaHsd	MGI:2450121	hm	abnormal testis morphology
Gal3st1<tm1Kho>/Gal3st1<tm1Kho>	involves: 129P2/OlaHsd	MGI:2450121	hm	arrest of male meiosis
Gal3st1<tm1Kho>/Gal3st1<tm1Kho>	involves: 129P2/OlaHsd	MGI:2450121	hm	ataxia
Gal3st1<tm1Kho>/Gal3st1<tm1Kho>	involves: 129P2/OlaHsd	MGI:2450121	hm	azoospermia
Gal3st1<tm1Kho>/Gal3st1<tm1Kho>	involves: 129P2/OlaHsd	MGI:2450121	hm	decreased testis weight
Gal3st1<tm1Kho>/Gal3st1<tm1Kho>	involves: 129P2/OlaHsd	MGI:2450121	hm	impaired limb coordination
Gal3st1<tm1Kho>/Gal3st1<tm1Kho>	involves: 129P2/OlaHsd	MGI:2450121	hm	limp posture
Gal3st1<tm1Kho>/Gal3st1<tm1Kho>	involves: 129P2/OlaHsd	MGI:2450121	hm	male infertility
Gal3st1<tm1Kho>/Gal3st1<tm1Kho>	involves: 129P2/OlaHsd	MGI:2450121	hm	tremors
Gal3st1<tm1Kho>/Gal3st1<tm1Kho>	involves: 129P2/OlaHsd	MGI:2450121	hm	weakness
Gjc2<tm1(EGFP)Kwi>/Gjc2<tm1(EGFP)Kwi>	involves: 129P2/OlaHsd * C57BL/6	MGI:2669665	hm	abnormal brain morphology
Gjc2<tm1(EGFP)Kwi>/Gjc2<tm1(EGFP)Kwi>	involves: 129P2/OlaHsd * C57BL/6	MGI:2669665	hm	abnormal cerebellum morphology
Gjc2<tm1(EGFP)Kwi>/Gjc2<tm1(EGFP)Kwi>	involves: 129P2/OlaHsd * C57BL/6	MGI:2669665	hm	abnormal cerebellum white matter morphology
Gjc2<tm1(EGFP)Kwi>/Gjc2<tm1(EGFP)Kwi>	involves: 129P2/OlaHsd * C57BL/6	MGI:2669665	hm	abnormal myelination
Gjc2<tm1(EGFP)Kwi>/Gjc2<tm1(EGFP)Kwi>	involves: 129P2/OlaHsd * C57BL/6	MGI:2669665	hm	abnormal oligodendrocyte physiology
Gjc2<tm1(EGFP)Kwi>/Gjc2<tm1(EGFP)Kwi>	involves: 129P2/OlaHsd * C57BL/6	MGI:2669665	hm	astrocytosis
Gjc2<tm1(EGFP)Kwi>/Gjc2<tm1(EGFP)Kwi>	involves: 129P2/OlaHsd * C57BL/6	MGI:2669665	hm	microgliosis
Gjc2<tm1(EGFP)Kwi>/Gjc2<tm1(EGFP)Kwi>	involves: 129P2/OlaHsd * C57BL/6	MGI:2669665	hm	neurodegeneration
Gjc2<tm1Paul>/Gjc2<tm1Paul>	involves: 129/Sv * C57BL/6	MGI:2675145	hm	no abnormal phenotype detected
Gjc3<tm1.1Kwi>/Gjc3<tm1.1Kwi>	involves: 129P2/OlaHsd * C57BL/6 * SJL	MGI:4420946	hm	hearing/vestibular/ear phenotype
Gjc3<tm1.1Kwi>/Gjc3<tm1.1Kwi>	involves: 129P2/OlaHsd * C57BL/6 * SJL	MGI:4420946	hm	nervous system phenotype
Gjc3<tm1.1Kwi>/Gjc3<tm1.1Kwi>	involves: 129P2/OlaHsd * C57BL/6 * SJL	MGI:4420946	hm	vision/eye phenotype
Gjc3<tm1Paul>/Gjc3<tm1Paul>	involves: 129S4/SvJae	MGI:3621926	hm	abnormal auditory brainstem response waveform shape
Gjc3<tm1Paul>/Gjc3<tm1Paul>	involves: 129S4/SvJae	MGI:3621926	hm	demyelination
Gjc3<tm1Paul>/Gjc3<tm1Paul>	involves: 129S4/SvJae	MGI:3621926	hm	increased or absent threshold for auditory brainstem response
Gjc3<tm1Paul>/Gjc3<tm1Paul>	involves: 129S4/SvJae	MGI:3621926	hm	increased susceptibility to noise-induced hearing loss
Ick<tm1a(KOMP)Mbp>/Ick<tm1a(KOMP)Mbp>	C57BL/6N-Ick<tm1a(KOMP)Mbp>	MGI:5693602	hm	abnormal bone mineralization
Ick<tm1a(KOMP)Mbp>/Ick<tm1a(KOMP)Mbp>	C57BL/6N-Ick<tm1a(KOMP)Mbp>	MGI:5693602	hm	abnormal digit development
Ick<tm1a(KOMP)Mbp>/Ick<tm1a(KOMP)Mbp>	C57BL/6N-Ick<tm1a(KOMP)Mbp>	MGI:5693602	hm	abnormal kidney development
Ick<tm1a(KOMP)Mbp>/Ick<tm1a(KOMP)Mbp>	C57BL/6N-Ick<tm1a(KOMP)Mbp>	MGI:5693602	hm	abnormal long bone morphology
Ick<tm1a(KOMP)Mbp>/Ick<tm1a(KOMP)Mbp>	C57BL/6N-Ick<tm1a(KOMP)Mbp>	MGI:5693602	hm	abnormal primary cilium morphology
Ick<tm1a(KOMP)Mbp>/Ick<tm1a(KOMP)Mbp>	C57BL/6N-Ick<tm1a(KOMP)Mbp>	MGI:5693602	hm	abnormal skeleton development
Ick<tm1a(KOMP)Mbp>/Ick<tm1a(KOMP)Mbp>	C57BL/6N-Ick<tm1a(KOMP)Mbp>	MGI:5693602	hm	abnormal tongue morphology
Ick<tm1a(KOMP)Mbp>/Ick<tm1a(KOMP)Mbp>	C57BL/6N-Ick<tm1a(KOMP)Mbp>	MGI:5693602	hm	abnormal ulna morphology
Ick<tm1a(KOMP)Mbp>/Ick<tm1a(KOMP)Mbp>	C57BL/6N-Ick<tm1a(KOMP)Mbp>	MGI:5693602	hm	cleft palate
Ick<tm1a(KOMP)Mbp>/Ick<tm1a(KOMP)Mbp>	C57BL/6N-Ick<tm1a(KOMP)Mbp>	MGI:5693602	hm	complete lethality throughout fetal growth and development
Ick<tm1a(KOMP)Mbp>/Ick<tm1a(KOMP)Mbp>	C57BL/6N-Ick<tm1a(KOMP)Mbp>	MGI:5693602	hm	decreased length of long bones
Ick<tm1a(KOMP)Mbp>/Ick<tm1a(KOMP)Mbp>	C57BL/6N-Ick<tm1a(KOMP)Mbp>	MGI:5693602	hm	decreased tongue size
Ick<tm1a(KOMP)Mbp>/Ick<tm1a(KOMP)Mbp>	C57BL/6N-Ick<tm1a(KOMP)Mbp>	MGI:5693602	hm	delayed bone ossification
Ick<tm1a(KOMP)Mbp>/Ick<tm1a(KOMP)Mbp>	C57BL/6N-Ick<tm1a(KOMP)Mbp>	MGI:5693602	hm	dilated brain ventricles
Ick<tm1a(KOMP)Mbp>/Ick<tm1a(KOMP)Mbp>	C57BL/6N-Ick<tm1a(KOMP)Mbp>	MGI:5693602	hm	edema
Ick<tm1a(KOMP)Mbp>/Ick<tm1a(KOMP)Mbp>	C57BL/6N-Ick<tm1a(KOMP)Mbp>	MGI:5693602	hm	Endocrine-Cerebroosteodysplasia
Ick<tm1a(KOMP)Mbp>/Ick<tm1a(KOMP)Mbp>	C57BL/6N-Ick<tm1a(KOMP)Mbp>	MGI:5693602	hm	hydroencephaly
Ick<tm1a(KOMP)Mbp>/Ick<tm1a(KOMP)Mbp>	C57BL/6N-Ick<tm1a(KOMP)Mbp>	MGI:5693602	hm	nervous system phenotype
Ick<tm1a(KOMP)Mbp>/Ick<tm1a(KOMP)Mbp>	C57BL/6N-Ick<tm1a(KOMP)Mbp>	MGI:5693602	hm	preaxial polydactyly
Ick<tm1a(KOMP)Mbp>/Ick<tm1a(KOMP)Mbp>	C57BL/6N-Ick<tm1a(KOMP)Mbp>	MGI:5693602	hm	short limbs
Insc<tm1.2Cayo>/Insc<tm1.2Cayo>	B6.129(SJL)-Insc<tm1.2Cayo>	MGI:5697649	hm	abnormal cochlear hair cell morphology
Insc<tm1.2Cayo>/Insc<tm1.2Cayo>	B6.129(SJL)-Insc<tm1.2Cayo>	MGI:5697649	hm	abnormal cochlear hair cell stereociliary bundle morphology
Mag<tm1Mtg>/Mag<tm1Mtg>	either: (involves: 129S2/SvPas) or (involves: 129S2/SvPas * C57BL/6)	MGI:4355931	hm	abnormal axon morphology
Mag<tm1Mtg>/Mag<tm1Mtg>	either: (involves: 129S2/SvPas) or (involves: 129S2/SvPas * C57BL/6)	MGI:4355931	hm	abnormal myelination
Mag<tm1Mtg>/Mag<tm1Mtg>	either: (involves: 129S2/SvPas) or (involves: 129S2/SvPas * C57BL/6)	MGI:4355931	hm	abnormal myelin sheath morphology
Mag<tm1Mtg>/Mag<tm1Mtg>	either: (involves: 129S2/SvPas) or (involves: 129S2/SvPas * C57BL/6)	MGI:4355931	hm	nervous system phenotype
Mag<tm1Mtg>/Mag<tm1Mtg>	involves: 129S2/SvPas	MGI:4355932	hm	abnormal axon morphology
Mag<tm1Mtg>/Mag<tm1Mtg>	involves: 129S2/SvPas	MGI:4355932	hm	abnormal oligodendrocyte morphology
Mag<tm1Mtg>/Mag<tm1Mtg>	involves: 129S2/SvPas	MGI:4355932	hm	abnormal Schwann cell morphology
Mag<tm1Mtg>/Mag<tm1Mtg>	involves: 129S2/SvPas	MGI:4355932	hm	axon degeneration
Mag<tm1Mtg>/Mag<tm1Mtg>	involves: 129S2/SvPas	MGI:4355932	hm	demyelination
Mag<tm1Pop>/Mag<tm1Pop>	involves: 129P2/OlaHsd * C57BL/6	MGI:3718117	hm	abnormal myelination
Mag<tm1Rod>/Mag<tm1Rod>	involves: 129S1/Sv * 129X1/SvJ	MGI:2182957	hm	abnormal axon morphology
Mag<tm1Rod>/Mag<tm1Rod>	involves: 129S1/Sv * 129X1/SvJ	MGI:2182957	hm	abnormal grooming behavior
Mag<tm1Rod>/Mag<tm1Rod>	involves: 129S1/Sv * 129X1/SvJ	MGI:2182957	hm	decreased aggression towards mice
Mag<tm1Rod>/Mag<tm1Rod>	involves: 129S1/Sv * 129X1/SvJ	MGI:2182957	hm	decreased prepulse inhibition
Mag<tm1Rod>/Mag<tm1Rod>	involves: 129S1/Sv * 129X1/SvJ	MGI:2182957	hm	decreased startle reflex
Mag<tm1Rod>/Mag<tm1Rod>	involves: 129S1/Sv * 129X1/SvJ	MGI:2182957	hm	hypoactivity
Mag<tm1Rod>/Mag<tm1Rod>	involves: 129S1/Sv * 129X1/SvJ	MGI:2182957	hm	impaired coordination
Mag<tm1Rod>/Mag<tm1Rod>	involves: 129S1/Sv * 129X1/SvJ	MGI:2182957	hm	increased B cell proliferation
Mag<tm1Rod>/Mag<tm1Rod>	involves: 129S1/Sv * 129X1/SvJ	MGI:2182957	hm	tremors
Map4k4<tm1Eys>/Map4k4<tm1Eys>	either: (involves: 129S/SvEv * Swiss Webster) or (involves: CD-1 * Swiss Webster)	MGI:3580009	hm	abnormal anterior primitive streak morphology
Map4k4<tm1Eys>/Map4k4<tm1Eys>	either: (involves: 129S/SvEv * Swiss Webster) or (involves: CD-1 * Swiss Webster)	MGI:3580009	hm	abnormal primitive streak morphology
Map4k4<tm1Eys>/Map4k4<tm1Eys>	either: (involves: 129S/SvEv * Swiss Webster) or (involves: CD-1 * Swiss Webster)	MGI:3580009	hm	absent somites
Map4k4<tm1Eys>/Map4k4<tm1Eys>	either: (involves: 129S/SvEv * Swiss Webster) or (involves: CD-1 * Swiss Webster)	MGI:3580009	hm	complete embryonic lethality during organogenesis
Map4k4<tm1Eys>/Map4k4<tm1Eys>	either: (involves: 129S/SvEv * Swiss Webster) or (involves: CD-1 * Swiss Webster)	MGI:3580009	hm	embryonic growth retardation
Map4k4<tm1Eys>/Map4k4<tm1Eys>	either: (involves: 129S/SvEv * Swiss Webster) or (involves: CD-1 * Swiss Webster)	MGI:3580009	hm	sirenomelia
Mobp<tm1Irg>/Mobp<tm1Irg>	involves: 129S1/SvImJ * C57BL/6J	MGI:3613509	hm	behavior/neurological phenotype
Mobp<tm1Irg>/Mobp<tm1Irg>	involves: 129S1/SvImJ * C57BL/6J	MGI:3613509	hm	nervous system phenotype
Mobp<tm1Sak>/Mobp<tm1Sak>	either: (involves: 129S1/Sv * 129X1/SvJ) or (involves: 129S1/Sv * 129X1/SvJ * C57BL/6)	MGI:3043019	hm	abnormal myelination
Mobp<tm1Sak>/Mobp<tm1Sak>	either: (involves: 129S1/Sv * 129X1/SvJ) or (involves: 129S1/Sv * 129X1/SvJ * C57BL/6)	MGI:3043019	hm	behavior/neurological phenotype
Nfasc<tm1.1Brp>/Nfasc<tm1.1Brp>	B6.129P2-Nfasc<tm1.1Brp>	MGI:3808611	hm	abnormal sciatic nerve morphology
Nfasc<tm1.1Brp>/Nfasc<tm1.1Brp>	B6.129P2-Nfasc<tm1.1Brp>	MGI:3808611	hm	complete postnatal lethality
Nfasc<tm1.1Brp>/Nfasc<tm1.1Brp>	B6.129P2-Nfasc<tm1.1Brp>	MGI:3808611	hm	decreased nerve conduction velocity
Nfasc<tm1.1Brp>/Nfasc<tm1.1Brp>	involves: 129P2/OlaHsd * C57BL/6	MGI:3808698	hm	abnormal axon morphology
Nfasc<tm1.1Brp>/Nfasc<tm1.1Brp>	involves: 129P2/OlaHsd * C57BL/6	MGI:3808698	hm	abnormal oligodendrocyte physiology
Nfasc<tm1.1Brp>/Nfasc<tm1.1Brp>	involves: 129P2/OlaHsd * ICR	MGI:4840025	hm	abnormal axon morphology
Nfasc<tm1.1Brp>/Nfasc<tm1.1Brp>	involves: 129P2/OlaHsd * ICR	MGI:4840025	hm	complete postnatal lethality
Nfasc<tm1.1Brp>/Nfasc<tm1.1Brp>	involves: 129P2/OlaHsd * ICR	MGI:4840025	hm	paralysis
Ninj2<tm1a(KOMP)Wtsi>/Ninj2<tm1a(KOMP)Wtsi>	C57BL/6N-Ninj2<tm1a(KOMP)Wtsi>/Wtsi	MGI:5631347	hm	increased red blood cell distribution width
Nkx6-2<tm1Ercs>/Nkx6-2<tm1Ercs>	involves: 129P2/OlaHsd * C57BL/6	MGI:3761142	hm	no abnormal phenotype detected
Nkx6-2<tm1Gow>/Nkx6-2<tm1Gow>	involves: 129S1/Sv * 129X1/SvJ * C57BL/6NTac	MGI:3522609	hm	abnormal myelination
Nkx6-2<tm1Gow>/Nkx6-2<tm1Gow>	involves: 129S1/Sv * 129X1/SvJ * C57BL/6NTac	MGI:3522609	hm	abnormal nerve conduction
Nkx6-2<tm1Gow>/Nkx6-2<tm1Gow>	involves: 129S1/Sv * 129X1/SvJ * C57BL/6NTac	MGI:3522609	hm	abnormal optic nerve morphology
Nkx6-2<tm1Gow>/Nkx6-2<tm1Gow>	involves: 129S1/Sv * 129X1/SvJ * C57BL/6NTac	MGI:3522609	hm	axon degeneration
Nkx6-2<tm1Gow>/Nkx6-2<tm1Gow>	involves: 129S1/Sv * 129X1/SvJ * C57BL/6NTac	MGI:3522609	hm	impaired coordination
Nkx6-2<tm1Qiu>/Nkx6-2<tm1Qiu>	Not Specified	MGI:3608657	hm	no abnormal phenotype detected
Pacs2<tm1a(EUCOMM)Hmgu>/Pacs2<tm1a(EUCOMM)Hmgu>	Not Specified	MGI:5450619	hm	abnormal behavior
Pacs2<tm1a(EUCOMM)Hmgu>/Pacs2<tm1a(EUCOMM)Hmgu>	Not Specified	MGI:5450619	hm	abnormal locomotor activation
Pacs2<tm1a(EUCOMM)Hmgu>/Pacs2<tm1a(EUCOMM)Hmgu>	Not Specified	MGI:5450619	hm	decreased grip strength
Pacs2<tm1a(EUCOMM)Hmgu>/Pacs2<tm1a(EUCOMM)Hmgu>	Not Specified	MGI:5450619	hm	decreased lean body mass
Pacs2<tm1a(EUCOMM)Hmgu>/Pacs2<tm1a(EUCOMM)Hmgu>	Not Specified	MGI:5450619	hm	hypoactivity
Pacs2<tm1a(EUCOMM)Hmgu>/Pacs2<tm1a(EUCOMM)Hmgu>	Not Specified	MGI:5450619	hm	increased startle reflex
Sema5a<tm1.2Alk>/Sema5a<tm1.2Alk>	involves: 129 * BALB/cJ * C57BL/6	MGI:5284887	hm	mortality/aging
Sema5a<tm1Awp>/Sema5a<tm1Awp>	involves: 129S1/Sv * 129X1/SvJ * NMRI	MGI:3577361	hm	abnormal blood vessel morphology
Sema5a<tm1Awp>/Sema5a<tm1Awp>	involves: 129S1/Sv * 129X1/SvJ * NMRI	MGI:3577361	hm	abnormal vascular branching morphogenesis
Sema5a<tm1Awp>/Sema5a<tm1Awp>	involves: 129S1/Sv * 129X1/SvJ * NMRI	MGI:3577361	hm	complete embryonic lethality during organogenesis
Sema5a<tm1Dgen>/Sema5a<tm1Dgen>	involves: 129P2/OlaHsd * C57BL/6	MGI:3606575	hm	no abnormal phenotype detected
Sema6d<tm1Kik>/Sema6d<tm1Kik>	Not Specified	MGI:4462173	hm	immune system phenotype
Sh3gl3<tm1.2Itl>/Sh3gl3<tm1.2Itl>	involves: 129S1/Sv * C57BL/6 * C57BL/6J * FVB/N * SJL	MGI:5468834	hm	no abnormal phenotype detected
Sirt2<tm1.1Cxd>/Sirt2<tm1.1Cxd>	either: (involves: C57BL/6 * FVB/N) or (involves: FVB/N * NIH Black Swiss)	MGI:5297585	hm	abnormal mitosis
Sirt2<tm1.1Cxd>/Sirt2<tm1.1Cxd>	either: (involves: C57BL/6 * FVB/N) or (involves: FVB/N * NIH Black Swiss)	MGI:5297585	hm	aneuploidy
Sirt2<tm1.1Cxd>/Sirt2<tm1.1Cxd>	either: (involves: C57BL/6 * FVB/N) or (involves: FVB/N * NIH Black Swiss)	MGI:5297585	hm	decreased fibroblast proliferation
Sirt2<tm1.1Cxd>/Sirt2<tm1.1Cxd>	either: (involves: C57BL/6 * FVB/N) or (involves: FVB/N * NIH Black Swiss)	MGI:5297585	hm	delayed cellular replicative senescence
Sirt2<tm1.1Cxd>/Sirt2<tm1.1Cxd>	either: (involves: C57BL/6 * FVB/N) or (involves: FVB/N * NIH Black Swiss)	MGI:5297585	hm	increased B cell derived lymphoma incidence
Sirt2<tm1.1Cxd>/Sirt2<tm1.1Cxd>	either: (involves: C57BL/6 * FVB/N) or (involves: FVB/N * NIH Black Swiss)	MGI:5297585	hm	increased gastrointestinal tumor incidence
Sirt2<tm1.1Cxd>/Sirt2<tm1.1Cxd>	either: (involves: C57BL/6 * FVB/N) or (involves: FVB/N * NIH Black Swiss)	MGI:5297585	hm	increased hepatocellular carcinoma incidence
Sirt2<tm1.1Cxd>/Sirt2<tm1.1Cxd>	either: (involves: C57BL/6 * FVB/N) or (involves: FVB/N * NIH Black Swiss)	MGI:5297585	hm	increased lung tumor incidence
Sirt2<tm1.1Cxd>/Sirt2<tm1.1Cxd>	either: (involves: C57BL/6 * FVB/N) or (involves: FVB/N * NIH Black Swiss)	MGI:5297585	hm	increased mammary gland tumor incidence
Sirt2<tm1.1Cxd>/Sirt2<tm1.1Cxd>	either: (involves: C57BL/6 * FVB/N) or (involves: FVB/N * NIH Black Swiss)	MGI:5297585	hm	increased pancreas tumor incidence
Sirt2<tm1.1Cxd>/Sirt2<tm1.1Cxd>	either: (involves: C57BL/6 * FVB/N) or (involves: FVB/N * NIH Black Swiss)	MGI:5297585	hm	increased prostate gland tumor incidence
Sirt2<tm1.1Cxd>/Sirt2<tm1.1Cxd>	either: (involves: C57BL/6 * FVB/N) or (involves: FVB/N * NIH Black Swiss)	MGI:5297585	hm	increased stomach tumor incidence
Sirt2<tm1.1Cxd>/Sirt2<tm1.1Cxd>	either: (involves: C57BL/6 * FVB/N) or (involves: FVB/N * NIH Black Swiss)	MGI:5297585	hm	increased tumor incidence
Sirt2<tm1.1Cxd>/Sirt2<tm1.1Cxd>	either: (involves: C57BL/6 * FVB/N) or (involves: FVB/N * NIH Black Swiss)	MGI:5297585	hm	mammary gland hyperplasia
Sirt2<tm1.1Fwa>/Sirt2<tm1.1Fwa>	involves: 129S6/SvEvTac * C57BL/6	MGI:5503177	hm	abnormal apoptosis
Sirt2<tm1.1Fwa>/Sirt2<tm1.1Fwa>	involves: 129S6/SvEvTac * C57BL/6	MGI:5503177	hm	abnormal cell cycle
Sirt2<tm1.1Fwa>/Sirt2<tm1.1Fwa>	involves: 129S6/SvEvTac * C57BL/6	MGI:5503177	hm	abnormal chromosome morphology
Sirt2<tm1.1Fwa>/Sirt2<tm1.1Fwa>	involves: 129S6/SvEvTac * C57BL/6	MGI:5503177	hm	abnormal mitosis
Sirt2<tm1.1Fwa>/Sirt2<tm1.1Fwa>	involves: 129S6/SvEvTac * C57BL/6	MGI:5503177	hm	altered tumor susceptibility
Sirt2<tm1.1Fwa>/Sirt2<tm1.1Fwa>	involves: 129S6/SvEvTac * C57BL/6	MGI:5503177	hm	increased sensitivity to xenobiotic induced morbidity/mortality
Sirt2<tm1a(EUCOMM)Wtsi>/Sirt2<tm1a(EUCOMM)Wtsi>	Not Specified	MGI:5450658	hm	abnormal behavior
Sirt2<tm1a(EUCOMM)Wtsi>/Sirt2<tm1a(EUCOMM)Wtsi>	Not Specified	MGI:5450658	hm	decreased CD4-positive, alpha beta T cell number
Sirt2<tm1a(EUCOMM)Wtsi>/Sirt2<tm1a(EUCOMM)Wtsi>	Not Specified	MGI:5450658	hm	decreased circulating chloride level
Sirt2<tm1a(EUCOMM)Wtsi>/Sirt2<tm1a(EUCOMM)Wtsi>	Not Specified	MGI:5450658	hm	decreased circulating sodium level
Sirt2<tm1a(EUCOMM)Wtsi>/Sirt2<tm1a(EUCOMM)Wtsi>	Not Specified	MGI:5450658	hm	decreased T cell number
Sirt2<tm1a(EUCOMM)Wtsi>/Sirt2<tm1a(EUCOMM)Wtsi>	Not Specified	MGI:5450658	hm	hyperactivity
Sirt2<tm1a(EUCOMM)Wtsi>/Sirt2<tm1a(EUCOMM)Wtsi>	Not Specified	MGI:5450658	hm	increased circulating cholesterol level
Sirt2<tm1a(EUCOMM)Wtsi>/Sirt2<tm1a(EUCOMM)Wtsi>	Not Specified	MGI:5450658	hm	increased circulating HDL cholesterol level
Sirt2<tm1a(EUCOMM)Wtsi>/Sirt2<tm1a(EUCOMM)Wtsi>	Not Specified	MGI:5450658	hm	increased heart weight
Sirt2<tm1a(EUCOMM)Wtsi>/Sirt2<tm1a(EUCOMM)Wtsi>	Not Specified	MGI:5450658	hm	increased lean body mass
Sirt2<tm1a(EUCOMM)Wtsi>/Sirt2<tm1a(EUCOMM)Wtsi>	Not Specified	MGI:5450658	hm	increased leukocyte cell number
Sirt2<tm1a(EUCOMM)Wtsi>/Sirt2<tm1a(EUCOMM)Wtsi>	Not Specified	MGI:5450658	hm	increased T cell number
Sirt2<tm1a(EUCOMM)Wtsi>/Sirt2<tm1a(EUCOMM)Wtsi>	Not Specified	MGI:5450658	hm	other aberrant phenotype
Sirt2<tm1a(EUCOMM)Wtsi>/Sirt2<tm1a(EUCOMM)Wtsi>	Not Specified	MGI:5450658	hm	thrombocytosis
Sirt2<tm1Gdon>/Sirt2<tm1Gdon>	involves: 129P2/OlaHsd * C57BL/6	MGI:5467289	hm	behavior/neurological phenotype
Sirt2<tm1Gdon>/Sirt2<tm1Gdon>	involves: 129P2/OlaHsd * C57BL/6	MGI:5467289	hm	nervous system phenotype
Tmeff2<tm1Fawa>/Tmeff2<tm1Fawa>	involves: 129P2/OlaHsd	MGI:5438566	hm	complete lethality at weaning
Tmeff2<tm1Fawa>/Tmeff2<tm1Fawa>	involves: 129P2/OlaHsd	MGI:5438566	hm	decreased body size
Tmeff2<tm1Fawa>/Tmeff2<tm1Fawa>	involves: 129P2/OlaHsd	MGI:5438566	hm	decreased white adipose tissue amount
Tmeff2<tm1Fawa>/Tmeff2<tm1Fawa>	involves: 129P2/OlaHsd	MGI:5438566	hm	nervous system phenotype
Tmeff2<tm1Fawa>/Tmeff2<tm1Fawa>	involves: 129P2/OlaHsd	MGI:5438566	hm	reproductive system phenotype
Tmeff2<tm1Fawa>/Tmeff2<tm1Fawa>	involves: 129P2/OlaHsd	MGI:5438566	hm	slow postnatal weight gain
Tmeff2<tm1Fawa>/Tmeff2<tm1Fawa>	involves: 129P2/OlaHsd	MGI:5438566	hm	tumorigenesis
Tspan2<tm1Hbw>/Tspan2<tm1Hbw>	C57BL/6-Tspan2<tm1Hbw>	MGI:5556058	hm	astrocytosis
Tspan2<tm1Hbw>/Tspan2<tm1Hbw>	C57BL/6-Tspan2<tm1Hbw>	MGI:5556058	hm	behavior/neurological phenotype
Tspan2<tm1Hbw>/Tspan2<tm1Hbw>	C57BL/6-Tspan2<tm1Hbw>	MGI:5556058	hm	growth/size/body region phenotype
Tspan2<tm1Hbw>/Tspan2<tm1Hbw>	C57BL/6-Tspan2<tm1Hbw>	MGI:5556058	hm	microgliosis
Tspan2<tm1Hbw>/Tspan2<tm1Hbw>	C57BL/6-Tspan2<tm1Hbw>	MGI:5556058	hm	nervous system phenotype
Ucn2<tm1.1Jde>/Ucn2<tm1.1Jde>	B6.129S2-Ucn2<tm1.1Jde>	MGI:4818662	hm	behavior/neurological phenotype
Ucn2<tm1Pbl>/Ucn2<tm1Pbl>	involves: 129 * C57BL/6	MGI:3629212	hm	abnormal drinking behavior
Ucn2<tm1Pbl>/Ucn2<tm1Pbl>	involves: 129 * C57BL/6	MGI:3629212	hm	abnormal locomotor activation
Ucn2<tm1Pbl>/Ucn2<tm1Pbl>	involves: 129 * C57BL/6	MGI:3629212	hm	decreased food intake
Ucn2<tm1Pbl>/Ucn2<tm1Pbl>	involves: 129 * C57BL/6	MGI:3629212	hm	increased circulating adrenocorticotropin level
Ucn2<tm1Pbl>/Ucn2<tm1Pbl>	involves: 129 * C57BL/6	MGI:3629212	hm	increased circulating corticosterone level
Ugt8a<tm1Pop>/Ugt8a<tm1Pop>	involves: 129P2/OlaHsd	MGI:4818645	hm	abnormal Purkinje cell morphology
Ugt8a<tm1Pop>/Ugt8a<tm1Pop>	involves: 129P2/OlaHsd * C57BL/6	MGI:2450119	hm	abnormal head movements
Ugt8a<tm1Pop>/Ugt8a<tm1Pop>	involves: 129P2/OlaHsd * C57BL/6	MGI:2450119	hm	abnormal lipid level
Ugt8a<tm1Pop>/Ugt8a<tm1Pop>	involves: 129P2/OlaHsd * C57BL/6	MGI:2450119	hm	abnormal myelination
Ugt8a<tm1Pop>/Ugt8a<tm1Pop>	involves: 129P2/OlaHsd * C57BL/6	MGI:2450119	hm	abnormal nerve conduction
Ugt8a<tm1Pop>/Ugt8a<tm1Pop>	involves: 129P2/OlaHsd * C57BL/6	MGI:2450119	hm	ataxia
Ugt8a<tm1Pop>/Ugt8a<tm1Pop>	involves: 129P2/OlaHsd * C57BL/6	MGI:2450119	hm	decreased body weight
Ugt8a<tm1Pop>/Ugt8a<tm1Pop>	involves: 129P2/OlaHsd * C57BL/6	MGI:2450119	hm	hindlimb paralysis
Ugt8a<tm1Pop>/Ugt8a<tm1Pop>	involves: 129P2/OlaHsd * C57BL/6	MGI:2450119	hm	immune system phenotype
Ugt8a<tm1Pop>/Ugt8a<tm1Pop>	involves: 129P2/OlaHsd * C57BL/6	MGI:2450119	hm	nervous system phenotype
Ugt8a<tm1Pop>/Ugt8a<tm1Pop>	involves: 129P2/OlaHsd * C57BL/6	MGI:2450119	hm	premature death
Ugt8a<tm1Pop>/Ugt8a<tm1Pop>	involves: 129P2/OlaHsd * C57BL/6	MGI:2450119	hm	tremors
Ugt8a<tm1Wst>/Ugt8a<tm1Wst>	involves: 129S1/Sv * 129X1/SvJ * C57BL/6	MGI:2450143	hm	abnormal gait
Ugt8a<tm1Wst>/Ugt8a<tm1Wst>	involves: 129S1/Sv * 129X1/SvJ * C57BL/6	MGI:2450143	hm	abnormal lipid level
Ugt8a<tm1Wst>/Ugt8a<tm1Wst>	involves: 129S1/Sv * 129X1/SvJ * C57BL/6	MGI:2450143	hm	abnormal nerve conduction
Ugt8a<tm1Wst>/Ugt8a<tm1Wst>	involves: 129S1/Sv * 129X1/SvJ * C57BL/6	MGI:2450143	hm	demyelination
Ugt8a<tm1Wst>/Ugt8a<tm1Wst>	involves: 129S1/Sv * 129X1/SvJ * C57BL/6	MGI:2450143	hm	forelimb paralysis
Ugt8a<tm1Wst>/Ugt8a<tm1Wst>	involves: 129S1/Sv * 129X1/SvJ * C57BL/6	MGI:2450143	hm	hindlimb paralysis
Ugt8a<tm1Wst>/Ugt8a<tm1Wst>	involves: 129S1/Sv * 129X1/SvJ * C57BL/6	MGI:2450143	hm	hypoactivity
Ugt8a<tm1Wst>/Ugt8a<tm1Wst>	involves: 129S1/Sv * 129X1/SvJ * C57BL/6	MGI:2450143	hm	postnatal growth retardation
Ugt8a<tm1Wst>/Ugt8a<tm1Wst>	involves: 129S1/Sv * 129X1/SvJ * C57BL/6	MGI:2450143	hm	premature death
Ugt8a<tm1Wst>/Ugt8a<tm1Wst>	involves: 129S1/Sv * 129X1/SvJ * C57BL/6	MGI:2450143	hm	tremors

## Sheet: 37_Neuronal cerebellum
Genotype symbol	Genotype Background	Genotype Primary Identifier	Genotype Zygosity	Ontology Annotation						MP term	p-value (Bonferroni 0.05)	Genotype	MP Ontology Term
Als2<tm1Cai>/Als2<tm1Cai>	involves: 129X1/SvJ * C57BL/6J	MGI:3589591	hm	abnormal motor learning						nervous system phenotype	8.00383e-10	MGI:2174796,MGI:2174797,MGI:2176742,MGI:2177605,MGI:2451150,MGI:2653197,MGI:2653198,MGI:2668376,MGI:3027710,MGI:3029892,MGI:3057125,MGI:3589591,MGI:3606457,MGI:3610545,MGI:3616467,MGI:3641413,MGI:3641414,MGI:3641415,MGI:3641416,MGI:3653642,MGI:3699325,MGI:3707543,MGI:3707982,MGI:3707984,MGI:3716313,MGI:3770664,MGI:3794860,MGI:3794864,MGI:3795133,MGI:3804915,MGI:3807481,MGI:3842517,MGI:3851247,MGI…	MP:0003631
Als2<tm1Cai>/Als2<tm1Cai>	involves: 129X1/SvJ * C57BL/6J	MGI:3589591	hm	Amyotrophic Lateral Sclerosis 2, Juvenile						decreased retinal ganglion cell number	1.34687e-06	MGI:3641414,MGI:3707543,MGI:3707984,MGI:3842517,MGI:4867682,MGI:5529142	MP:0006309
Als2<tm1Cai>/Als2<tm1Cai>	involves: 129X1/SvJ * C57BL/6J	MGI:3589591	hm	decreased exploration in new environment						abnormal neuron morphology	1.4875e-05	MGI:2451150,MGI:3057125,MGI:3616467,MGI:3641414,MGI:3641415,MGI:3641416,MGI:3653642,MGI:3699325,MGI:3707543,MGI:3707982,MGI:3707984,MGI:3794860,MGI:3807481,MGI:3842517,MGI:3851247,MGI:4365394,MGI:4867682,MGI:4940063,MGI:4940975,MGI:5433307,MGI:5529142	MP:0002882
Als2<tm1Cai>/Als2<tm1Cai>	involves: 129X1/SvJ * C57BL/6J	MGI:3589591	hm	impaired coordination						abnormal nervous system morphology	2.74825e-05	MGI:2174796,MGI:2174797,MGI:2451150,MGI:2653197,MGI:2653198,MGI:3029892,MGI:3057125,MGI:3610545,MGI:3616467,MGI:3641413,MGI:3641414,MGI:3641415,MGI:3641416,MGI:3653642,MGI:3699325,MGI:3707543,MGI:3707982,MGI:3707984,MGI:3770664,MGI:3794860,MGI:3807481,MGI:3842517,MGI:3851247,MGI:4365394,MGI:4867682,MGI:4940063,MGI:4940975,MGI:5433307,MGI:5433340,MGI:5529142	MP:0003632
Als2<tm1Cai>/Als2<tm1Cai>	involves: 129X1/SvJ * C57BL/6J	MGI:3589591	hm	increased anxiety-related response						abnormal somatic nervous system morphology	3.49413e-05	MGI:2174796,MGI:2174797,MGI:3057125,MGI:3616467,MGI:3641413,MGI:3641414,MGI:3641415,MGI:3641416,MGI:3707543,MGI:3707982,MGI:3707984,MGI:3807481,MGI:3842517,MGI:4867682,MGI:5433340,MGI:5529142	MP:0002752
Als2<tm1Cai>/Als2<tm1Cai>	involves: 129X1/SvJ * C57BL/6J	MGI:3589591	hm	increased body weight						abnormal retinal ganglion layer morphology	5.61149e-05	MGI:3641413,MGI:3641414,MGI:3707543,MGI:3707984,MGI:3842517,MGI:4867682,MGI:5529142	MP:0005241
Als2<tm1Cai>/Als2<tm1Cai>	involves: 129X1/SvJ * C57BL/6J	MGI:3589591	hm	increased physiological sensitivity to xenobiotic						absent optic nerve	7.45209e-05	MGI:3641413,MGI:3707543,MGI:5433340,MGI:5529142	MP:0001333
Als2<tm1Cai>/Als2<tm1Cai>	involves: 129X1/SvJ * C57BL/6J	MGI:3589591	hm	increased sensitivity to xenobiotic induced morbidity/mortality						abnormal retinal neuronal layer morphology	9.83593e-05	MGI:3641413,MGI:3641414,MGI:3641415,MGI:3641416,MGI:3707543,MGI:3707984,MGI:3842517,MGI:4867682,MGI:5433340,MGI:5529142	MP:0006069
Als2<tm1Cai>/Als2<tm1Cai>	involves: 129X1/SvJ * C57BL/6J	MGI:3589591	hm	nervous system phenotype						abnormal retina morphology	0.000314792	MGI:3057125,MGI:3641413,MGI:3641414,MGI:3641415,MGI:3641416,MGI:3707543,MGI:3707982,MGI:3707984,MGI:3842517,MGI:4867682,MGI:5433340,MGI:5529142	MP:0001325
Als2<tm1Deng>/Als2<tm1Deng>	involves: 129/Sv	MGI:3770664	hm	abnormal corticospinal tract morphology						abnormal ocular fundus morphology	0.000340606	MGI:3057125,MGI:3641413,MGI:3641414,MGI:3641415,MGI:3641416,MGI:3707543,MGI:3707982,MGI:3707984,MGI:3842517,MGI:4867682,MGI:5433340,MGI:5529142	MP:0002864
Als2<tm1Deng>/Als2<tm1Deng>	involves: 129/Sv	MGI:3770664	hm	impaired coordination						abnormal retinal ganglion cell morphology	0.000344595	MGI:3641414,MGI:3707543,MGI:3707984,MGI:3842517,MGI:4867682,MGI:5529142	MP:0008056
Als2<tm1Deng>/Als2<tm1Deng>	involves: 129/Sv	MGI:3770664	hm	neurodegeneration						abnormal optic nerve morphology	0.000417795	MGI:3641413,MGI:3707543,MGI:3707984,MGI:3842517,MGI:5433340,MGI:5529142	MP:0001330
Als2<tm1Garo>/Als2<tm1Garo>	either: (involves: 129S1/Sv * 129X1/SvJ) or (involves: 129S1/Sv * 129X1/SvJ * C57BL/6)	MGI:3807481	hm	abnormal axonal transport						decreased sensory neuron number	0.000760104	MGI:3641414,MGI:3641415,MGI:3707543,MGI:3707984,MGI:3842517,MGI:4867682,MGI:5529142	MP:0000966
Als2<tm1Garo>/Als2<tm1Garo>	either: (involves: 129S1/Sv * 129X1/SvJ) or (involves: 129S1/Sv * 129X1/SvJ * C57BL/6)	MGI:3807481	hm	abnormal axon morphology						abnormal retinal layer morphology	0.000807356	MGI:3641413,MGI:3641414,MGI:3641415,MGI:3641416,MGI:3707543,MGI:3707984,MGI:3842517,MGI:4867682,MGI:5433340,MGI:5529142	MP:0003727
Als2<tm1Garo>/Als2<tm1Garo>	either: (involves: 129S1/Sv * 129X1/SvJ) or (involves: 129S1/Sv * 129X1/SvJ * C57BL/6)	MGI:3807481	hm	abnormal corticospinal tract morphology						abnormal posterior eye segment morphology	0.000913021	MGI:3057125,MGI:3641413,MGI:3641414,MGI:3641415,MGI:3641416,MGI:3707543,MGI:3707982,MGI:3707984,MGI:3842517,MGI:4867682,MGI:5433340,MGI:5529142	MP:0005195
Als2<tm1Garo>/Als2<tm1Garo>	either: (involves: 129S1/Sv * 129X1/SvJ) or (involves: 129S1/Sv * 129X1/SvJ * C57BL/6)	MGI:3807481	hm	abnormal physical strength						abnormal neuron number	0.000949457	MGI:2451150,MGI:3616467,MGI:3641414,MGI:3641415,MGI:3707543,MGI:3707982,MGI:3707984,MGI:3842517,MGI:4867682,MGI:5529142	MP:0008946
Als2<tm1Garo>/Als2<tm1Garo>	either: (involves: 129S1/Sv * 129X1/SvJ) or (involves: 129S1/Sv * 129X1/SvJ * C57BL/6)	MGI:3807481	hm	abnormal ventral spinal root morphology						decreased neuron number	0.00284494	MGI:2451150,MGI:3616467,MGI:3641414,MGI:3641415,MGI:3707543,MGI:3707984,MGI:3842517,MGI:4867682,MGI:5529142	MP:0008948
Als2<tm1Garo>/Als2<tm1Garo>	either: (involves: 129S1/Sv * 129X1/SvJ) or (involves: 129S1/Sv * 129X1/SvJ * C57BL/6)	MGI:3807481	hm	Amyotrophic Lateral Sclerosis 2, Juvenile						abnormal somatic sensory system morphology	0.00381408	MGI:2174796,MGI:2174797,MGI:3057125,MGI:3641414,MGI:3641415,MGI:3641416,MGI:3707543,MGI:3707982,MGI:3707984,MGI:3842517,MGI:4867682,MGI:5529142	MP:0000959
Als2<tm1Garo>/Als2<tm1Garo>	either: (involves: 129S1/Sv * 129X1/SvJ) or (involves: 129S1/Sv * 129X1/SvJ * C57BL/6)	MGI:3807481	hm	axon degeneration						abnormal CNS synaptic transmission	0.00401347	MGI:2176742,MGI:2451150,MGI:3610545,MGI:3699325,MGI:3794860,MGI:3794864,MGI:3804915,MGI:4943910,MGI:5298026,MGI:5427825	MP:0002206
Als2<tm1Garo>/Als2<tm1Garo>	either: (involves: 129S1/Sv * 129X1/SvJ) or (involves: 129S1/Sv * 129X1/SvJ * C57BL/6)	MGI:3807481	hm	impaired coordination						abnormal sensory neuron morphology	0.00423534	MGI:3057125,MGI:3641414,MGI:3641415,MGI:3641416,MGI:3707543,MGI:3707982,MGI:3707984,MGI:3842517,MGI:4867682,MGI:5529142	MP:0000965
Als2<tm1Hay>/Als2<tm1Hay>	involves: 129S1/SvImJ * C57BL/6J	MGI:3653642	hm	abnormal motor neuron morphology						abnormal cerebellum morphology	0.0115481	MGI:2451150,MGI:2653197,MGI:2653198,MGI:3610545,MGI:3616467,MGI:3699325,MGI:3794860,MGI:3851247,MGI:4940063	MP:0000849
Als2<tm1Hay>/Als2<tm1Hay>	involves: 129S1/SvImJ * C57BL/6J	MGI:3653642	hm	abnormal neuron morphology						abnormal retinal bipolar cell morphology	0.0124757	MGI:3057125,MGI:3641415,MGI:3707543,MGI:5529142	MP:0006073
Als2<tm1Hay>/Als2<tm1Hay>	involves: 129S1/SvImJ * C57BL/6J	MGI:3653642	hm	hypoactivity						abnormal amacrine cell morphology	0.0132684	MGI:3057125,MGI:3641414,MGI:3707543,MGI:3707982	MP:0005240
Als2<tm1Jei>/Als2<tm1Jei>	involves: 129P2/OlaHsd * C57BL/6J	MGI:3616467	hm	abnormal action potential						abnormal cerebellar cortex morphology	0.0135696	MGI:2451150,MGI:2653197,MGI:2653198,MGI:3610545,MGI:3616467,MGI:3699325,MGI:3794860,MGI:3851247	MP:0004097
Als2<tm1Jei>/Als2<tm1Jei>	involves: 129P2/OlaHsd * C57BL/6J	MGI:3616467	hm	abnormal motor neuron innervation pattern						abnormal synaptic transmission	0.0175568	MGI:2176742,MGI:2451150,MGI:3610545,MGI:3699325,MGI:3794860,MGI:3794864,MGI:3804915,MGI:4943910,MGI:5298026,MGI:5427825	MP:0003635
Als2<tm1Jei>/Als2<tm1Jei>	involves: 129P2/OlaHsd * C57BL/6J	MGI:3616467	hm	abnormal neuromuscular synapse morphology						abnormal metencephalon morphology	0.0202288	MGI:2451150,MGI:2653197,MGI:2653198,MGI:3610545,MGI:3616467,MGI:3699325,MGI:3794860,MGI:3851247,MGI:4940063	MP:0000847
Als2<tm1Jei>/Als2<tm1Jei>	involves: 129P2/OlaHsd * C57BL/6J	MGI:3616467	hm	abnormal Purkinje cell morphology						decreased total retina thickness	0.021761	MGI:3641413,MGI:3707984,MGI:5529142	MP:0011965
Als2<tm1Jei>/Als2<tm1Jei>	involves: 129P2/OlaHsd * C57BL/6J	MGI:3616467	hm	abnormal skeletal muscle fiber morphology						abnormal hindbrain morphology	0.03996	MGI:2451150,MGI:2653197,MGI:2653198,MGI:3610545,MGI:3616467,MGI:3699325,MGI:3794860,MGI:3851247,MGI:4940063	MP:0000841
Als2<tm1Jei>/Als2<tm1Jei>	involves: 129P2/OlaHsd * C57BL/6J	MGI:3616467	hm	abnormal skeletal muscle fiber type ratio
Als2<tm1Jei>/Als2<tm1Jei>	involves: 129P2/OlaHsd * C57BL/6J	MGI:3616467	hm	Amyotrophic Lateral Sclerosis 2, Juvenile
Als2<tm1Jei>/Als2<tm1Jei>	involves: 129P2/OlaHsd * C57BL/6J	MGI:3616467	hm	astrocytosis
Als2<tm1Jei>/Als2<tm1Jei>	involves: 129P2/OlaHsd * C57BL/6J	MGI:3616467	hm	behavior/neurological phenotype
Als2<tm1Jei>/Als2<tm1Jei>	involves: 129P2/OlaHsd * C57BL/6J	MGI:3616467	hm	centrally nucleated skeletal muscle fibers
Als2<tm1Jei>/Als2<tm1Jei>	involves: 129P2/OlaHsd * C57BL/6J	MGI:3616467	hm	CNS inflammation
Als2<tm1Jei>/Als2<tm1Jei>	involves: 129P2/OlaHsd * C57BL/6J	MGI:3616467	hm	decreased motor neuron number
Als2<tm1Jei>/Als2<tm1Jei>	involves: 129P2/OlaHsd * C57BL/6J	MGI:3616467	hm	decreased Purkinje cell number
Als2<tm1Jei>/Als2<tm1Jei>	involves: 129P2/OlaHsd * C57BL/6J	MGI:3616467	hm	skeletal muscle fiber atrophy
Atoh7<tm1.1(Ascl1)Nlbr>/Atoh7<tm1.1(Ascl1)Nlbr>	either: 129(Cg)-Atoh7<tm1.1(Ascl1)Nlbr> or B6.129S6(Cg)-Atoh7<tm1.1(Ascl1)Nlbr> or (involves: 129S6/SvEvTac * C57BL/6J * CD-1 * FVB/N)	MGI:5529142	hm	abnormal Muller cell morphology
Atoh7<tm1.1(Ascl1)Nlbr>/Atoh7<tm1.1(Ascl1)Nlbr>	either: 129(Cg)-Atoh7<tm1.1(Ascl1)Nlbr> or B6.129S6(Cg)-Atoh7<tm1.1(Ascl1)Nlbr> or (involves: 129S6/SvEvTac * C57BL/6J * CD-1 * FVB/N)	MGI:5529142	hm	abnormal retinal bipolar cell morphology
Atoh7<tm1.1(Ascl1)Nlbr>/Atoh7<tm1.1(Ascl1)Nlbr>	either: 129(Cg)-Atoh7<tm1.1(Ascl1)Nlbr> or B6.129S6(Cg)-Atoh7<tm1.1(Ascl1)Nlbr> or (involves: 129S6/SvEvTac * C57BL/6J * CD-1 * FVB/N)	MGI:5529142	hm	abnormal retinal vasculature morphology
Atoh7<tm1.1(Ascl1)Nlbr>/Atoh7<tm1.1(Ascl1)Nlbr>	either: 129(Cg)-Atoh7<tm1.1(Ascl1)Nlbr> or B6.129S6(Cg)-Atoh7<tm1.1(Ascl1)Nlbr> or (involves: 129S6/SvEvTac * C57BL/6J * CD-1 * FVB/N)	MGI:5529142	hm	absent optic nerve
Atoh7<tm1.1(Ascl1)Nlbr>/Atoh7<tm1.1(Ascl1)Nlbr>	either: 129(Cg)-Atoh7<tm1.1(Ascl1)Nlbr> or B6.129S6(Cg)-Atoh7<tm1.1(Ascl1)Nlbr> or (involves: 129S6/SvEvTac * C57BL/6J * CD-1 * FVB/N)	MGI:5529142	hm	decreased retinal ganglion cell number
Atoh7<tm1.1(Ascl1)Nlbr>/Atoh7<tm1.1(Ascl1)Nlbr>	either: 129(Cg)-Atoh7<tm1.1(Ascl1)Nlbr> or B6.129S6(Cg)-Atoh7<tm1.1(Ascl1)Nlbr> or (involves: 129S6/SvEvTac * C57BL/6J * CD-1 * FVB/N)	MGI:5529142	hm	decreased total retina thickness
Atoh7<tm1.1(Ascl1)Nlbr>/Atoh7<tm1.1(Ascl1)Nlbr>	either: 129(Cg)-Atoh7<tm1.1(Ascl1)Nlbr> or B6.129S6(Cg)-Atoh7<tm1.1(Ascl1)Nlbr> or (involves: 129S6/SvEvTac * C57BL/6J * CD-1 * FVB/N)	MGI:5529142	hm	increased retinal cone cell number
Atoh7<tm1Gan>/Atoh7<tm1Gan>	B6.Cg-Atoh7<tm1Gan>	MGI:3842517	hm	abnormal eye electrophysiology
Atoh7<tm1Gan>/Atoh7<tm1Gan>	B6.Cg-Atoh7<tm1Gan>	MGI:3842517	hm	abnormal Muller cell morphology
Atoh7<tm1Gan>/Atoh7<tm1Gan>	B6.Cg-Atoh7<tm1Gan>	MGI:3842517	hm	abnormal retinal apoptosis
Atoh7<tm1Gan>/Atoh7<tm1Gan>	B6.Cg-Atoh7<tm1Gan>	MGI:3842517	hm	abnormal retinal ganglion cell morphology
Atoh7<tm1Gan>/Atoh7<tm1Gan>	B6.Cg-Atoh7<tm1Gan>	MGI:3842517	hm	abnormal retina morphology
Atoh7<tm1Gan>/Atoh7<tm1Gan>	B6.Cg-Atoh7<tm1Gan>	MGI:3842517	hm	decreased retinal ganglion cell number
Atoh7<tm1Gan>/Atoh7<tm1Gan>	B6.Cg-Atoh7<tm1Gan>	MGI:3842517	hm	optic nerve hypoplasia
Atoh7<tm1Gan>/Atoh7<tm1Gan>	involves: 129S/SvEv * C57BL/6J	MGI:3707982	hm	increased amacrine cell number
Atoh7<tm1Gan>/Atoh7<tm1Gan>	involves: 129S/SvEv * C57BL/6J	MGI:3707982	hm	reproductive system phenotype
Atoh7<tm1Gan>/Atoh7<tm1Gan>	Not Specified	MGI:3707543	hm	abnormal retinal cone bipolar cell morphology
Atoh7<tm1Gan>/Atoh7<tm1Gan>	Not Specified	MGI:3707543	hm	absent optic nerve
Atoh7<tm1Gan>/Atoh7<tm1Gan>	Not Specified	MGI:3707543	hm	absent retinal ganglion cell
Atoh7<tm1Gan>/Atoh7<tm1Gan>	Not Specified	MGI:3707543	hm	increased amacrine cell number
Atoh7<tm1Gla>/Atoh7<tm1Gla>	B6.129-Atoh7<tm1Gla>	MGI:3641415	hm	abnormal circadian rhythm
Atoh7<tm1Gla>/Atoh7<tm1Gla>	B6.129-Atoh7<tm1Gla>	MGI:3641415	hm	abnormal eye electrophysiology
Atoh7<tm1Gla>/Atoh7<tm1Gla>	B6.129-Atoh7<tm1Gla>	MGI:3641415	hm	abnormal retinal bipolar cell morphology
Atoh7<tm1Gla>/Atoh7<tm1Gla>	B6.129-Atoh7<tm1Gla>	MGI:3641415	hm	abnormal retinal cone bipolar cell morphology
Atoh7<tm1Gla>/Atoh7<tm1Gla>	B6.129-Atoh7<tm1Gla>	MGI:3641415	hm	abnormal retinal rod bipolar cell morphology
Atoh7<tm1Gla>/Atoh7<tm1Gla>	B6.129-Atoh7<tm1Gla>	MGI:3641415	hm	absent optic tract
Atoh7<tm1Gla>/Atoh7<tm1Gla>	B6.129-Atoh7<tm1Gla>	MGI:3641415	hm	decreased retinal rod cell number
Atoh7<tm1Gla>/Atoh7<tm1Gla>	B6.129-Atoh7<tm1Gla>	MGI:3641415	hm	thin retinal inner nuclear layer
Atoh7<tm1Gla>/Atoh7<tm1Gla>	B6.129-Atoh7<tm1Gla>	MGI:3641415	hm	thin retinal inner plexiform layer
Atoh7<tm1Gla>/Atoh7<tm1Gla>	B6.129-Atoh7<tm1Gla>	MGI:3641415	hm	thin retinal outer nuclear layer
Atoh7<tm1Gla>/Atoh7<tm1Gla>	B6.129-Atoh7<tm1Gla>	MGI:3641415	hm	thin retinal outer plexiform layer
Atoh7<tm1Gla>/Atoh7<tm1Gla>	either: (involves: 129S1/Sv * 129S1/SvImJ * 129X1/SvJ) or (involves: 129S1/Sv * 129X1/SvJ * CD-1)	MGI:3641416	hm	abnormal cell cycle
Atoh7<tm1Gla>/Atoh7<tm1Gla>	either: (involves: 129S1/Sv * 129S1/SvImJ * 129X1/SvJ) or (involves: 129S1/Sv * 129X1/SvJ * CD-1)	MGI:3641416	hm	abnormal eye development
Atoh7<tm1Gla>/Atoh7<tm1Gla>	either: (involves: 129S1/Sv * 129S1/SvImJ * 129X1/SvJ) or (involves: 129S1/Sv * 129X1/SvJ * CD-1)	MGI:3641416	hm	abnormal retinal cone cell morphology
Atoh7<tm1Gla>/Atoh7<tm1Gla>	involves: 129S1/Sv * 129S1/SvImJ * 129X1/SvJ * C57BL/6J	MGI:3641413	hm	abnormal blood vessel morphology
Atoh7<tm1Gla>/Atoh7<tm1Gla>	involves: 129S1/Sv * 129S1/SvImJ * 129X1/SvJ * C57BL/6J	MGI:3641413	hm	abnormal eye development
Atoh7<tm1Gla>/Atoh7<tm1Gla>	involves: 129S1/Sv * 129S1/SvImJ * 129X1/SvJ * C57BL/6J	MGI:3641413	hm	abnormal optic vesicle formation
Atoh7<tm1Gla>/Atoh7<tm1Gla>	involves: 129S1/Sv * 129S1/SvImJ * 129X1/SvJ * C57BL/6J	MGI:3641413	hm	abnormal retinal vasculature morphology
Atoh7<tm1Gla>/Atoh7<tm1Gla>	involves: 129S1/Sv * 129S1/SvImJ * 129X1/SvJ * C57BL/6J	MGI:3641413	hm	abnormal retina morphology
Atoh7<tm1Gla>/Atoh7<tm1Gla>	involves: 129S1/Sv * 129S1/SvImJ * 129X1/SvJ * C57BL/6J	MGI:3641413	hm	absent optic nerve
Atoh7<tm1Gla>/Atoh7<tm1Gla>	involves: 129S1/Sv * 129S1/SvImJ * 129X1/SvJ * C57BL/6J	MGI:3641413	hm	absent retinal ganglion layer
Atoh7<tm1Gla>/Atoh7<tm1Gla>	involves: 129S1/Sv * 129S1/SvImJ * 129X1/SvJ * C57BL/6J	MGI:3641413	hm	decreased total retina thickness
Atoh7<tm1Gla>/Atoh7<tm1Gla>	involves: 129S1/Sv * 129S1/SvImJ * 129X1/SvJ * C57BL/6J	MGI:3641413	hm	thin retinal inner nuclear layer
Atoh7<tm1Gla>/Atoh7<tm1Gla>	involves: 129S1/Sv * 129S1/SvImJ * 129X1/SvJ * C57BL/6J	MGI:3641413	hm	thin retinal inner plexiform layer
Atoh7<tm1Gla>/Atoh7<tm1Gla>	involves: 129S1/Sv * 129X1/SvJ * C57BL/6	MGI:5433340	hm	abnormal retinal nerve fiber layer morphology
Atoh7<tm1Gla>/Atoh7<tm1Gla>	involves: 129S1/Sv * 129X1/SvJ * C57BL/6	MGI:5433340	hm	abnormal retina morphology
Atoh7<tm1Gla>/Atoh7<tm1Gla>	involves: 129S1/Sv * 129X1/SvJ * C57BL/6	MGI:5433340	hm	absent optic nerve
Atoh7<tm1Gla>/Atoh7<tm1Gla>	involves: 129S1/Sv * 129X1/SvJ * C57BL/6J * CD-1	MGI:3641414	hm	abnormal amacrine cell morphology
Atoh7<tm1Gla>/Atoh7<tm1Gla>	involves: 129S1/Sv * 129X1/SvJ * C57BL/6J * CD-1	MGI:3641414	hm	abnormal retinal ganglion layer morphology
Atoh7<tm1Gla>/Atoh7<tm1Gla>	involves: 129S1/Sv * 129X1/SvJ * C57BL/6J * CD-1	MGI:3641414	hm	absent retinal ganglion cell
Atoh7<tm1Gla>/Atoh7<tm1Gla>	involves: 129S1/Sv * 129X1/SvJ * C57BL/6J * CD-1	MGI:3641414	hm	increased retinal cone cell number
Atoh7<tm2Gan>/Atoh7<tm2Gan>	involves: 129S4/SvJaeSor * 129S6/SvEvTac * C57BL/6 * DBA/2	MGI:4867682	hm	decreased retinal ganglion cell number
Atoh7<tm2Gan>/Atoh7<tm2Gan>	involves: 129S/SvEv * C57BL/6J	MGI:3707984	hm	abnormal optic chiasm morphology
Atoh7<tm2Gan>/Atoh7<tm2Gan>	involves: 129S/SvEv * C57BL/6J	MGI:3707984	hm	abnormal optic nerve morphology
Atoh7<tm2Gan>/Atoh7<tm2Gan>	involves: 129S/SvEv * C57BL/6J	MGI:3707984	hm	abnormal retinal ganglion cell morphology
Atoh7<tm2Gan>/Atoh7<tm2Gan>	involves: 129S/SvEv * C57BL/6J	MGI:3707984	hm	abnormal retinal nerve fiber layer morphology
Atoh7<tm2Gan>/Atoh7<tm2Gan>	involves: 129S/SvEv * C57BL/6J	MGI:3707984	hm	abnormal retina morphology
Atoh7<tm2Gan>/Atoh7<tm2Gan>	involves: 129S/SvEv * C57BL/6J	MGI:3707984	hm	decreased retinal ganglion cell number
Atoh7<tm2Gan>/Atoh7<tm2Gan>	involves: 129S/SvEv * C57BL/6J	MGI:3707984	hm	decreased total retina thickness
Atoh7<tm2Gan>/Atoh7<tm2Gan>	involves: 129S/SvEv * C57BL/6J	MGI:3707984	hm	reproductive system phenotype
Atoh7<tm2Gan>/Atoh7<tm2Gan>	Not Specified	MGI:5472142	hm	abnormal rod electrophysiology
Camk4<tm1Arm>/Camk4<tm1Arm>	involves: 129 * C57BL/6J	MGI:2451150	hm	abnormal excitatory postsynaptic currents
Camk4<tm1Arm>/Camk4<tm1Arm>	involves: 129 * C57BL/6J	MGI:2451150	hm	abnormal female reproductive system morphology
Camk4<tm1Arm>/Camk4<tm1Arm>	involves: 129 * C57BL/6J	MGI:2451150	hm	abnormal gametogenesis
Camk4<tm1Arm>/Camk4<tm1Arm>	involves: 129 * C57BL/6J	MGI:2451150	hm	abnormal male reproductive system morphology
Camk4<tm1Arm>/Camk4<tm1Arm>	involves: 129 * C57BL/6J	MGI:2451150	hm	abnormal ovarian follicle morphology
Camk4<tm1Arm>/Camk4<tm1Arm>	involves: 129 * C57BL/6J	MGI:2451150	hm	abnormal Purkinje cell morphology
Camk4<tm1Arm>/Camk4<tm1Arm>	involves: 129 * C57BL/6J	MGI:2451150	hm	abnormal reproductive system morphology
Camk4<tm1Arm>/Camk4<tm1Arm>	involves: 129 * C57BL/6J	MGI:2451150	hm	abnormal reproductive system physiology
Camk4<tm1Arm>/Camk4<tm1Arm>	involves: 129 * C57BL/6J	MGI:2451150	hm	abnormal spermatid morphology
Camk4<tm1Arm>/Camk4<tm1Arm>	involves: 129 * C57BL/6J	MGI:2451150	hm	abnormal sperm flagellum morphology
Camk4<tm1Arm>/Camk4<tm1Arm>	involves: 129 * C57BL/6J	MGI:2451150	hm	abnormal sperm head morphology
Camk4<tm1Arm>/Camk4<tm1Arm>	involves: 129 * C57BL/6J	MGI:2451150	hm	abnormal spermiogenesis
Camk4<tm1Arm>/Camk4<tm1Arm>	involves: 129 * C57BL/6J	MGI:2451150	hm	abnormal synaptic depression
Camk4<tm1Arm>/Camk4<tm1Arm>	involves: 129 * C57BL/6J	MGI:2451150	hm	absent corpus luteum
Camk4<tm1Arm>/Camk4<tm1Arm>	involves: 129 * C57BL/6J	MGI:2451150	hm	anovulation
Camk4<tm1Arm>/Camk4<tm1Arm>	involves: 129 * C57BL/6J	MGI:2451150	hm	arrest of spermatogenesis
Camk4<tm1Arm>/Camk4<tm1Arm>	involves: 129 * C57BL/6J	MGI:2451150	hm	ataxia
Camk4<tm1Arm>/Camk4<tm1Arm>	involves: 129 * C57BL/6J	MGI:2451150	hm	decreased body weight
Camk4<tm1Arm>/Camk4<tm1Arm>	involves: 129 * C57BL/6J	MGI:2451150	hm	decreased litter size
Camk4<tm1Arm>/Camk4<tm1Arm>	involves: 129 * C57BL/6J	MGI:2451150	hm	decreased male germ cell number
Camk4<tm1Arm>/Camk4<tm1Arm>	involves: 129 * C57BL/6J	MGI:2451150	hm	decreased Purkinje cell number
Camk4<tm1Arm>/Camk4<tm1Arm>	involves: 129 * C57BL/6J	MGI:2451150	hm	decreased testis weight
Camk4<tm1Arm>/Camk4<tm1Arm>	involves: 129 * C57BL/6J	MGI:2451150	hm	decreased vertical activity
Camk4<tm1Arm>/Camk4<tm1Arm>	involves: 129 * C57BL/6J	MGI:2451150	hm	homeostasis/metabolism phenotype
Camk4<tm1Arm>/Camk4<tm1Arm>	involves: 129 * C57BL/6J	MGI:2451150	hm	hypoactivity
Camk4<tm1Arm>/Camk4<tm1Arm>	involves: 129 * C57BL/6J	MGI:2451150	hm	impaired coordination
Camk4<tm1Arm>/Camk4<tm1Arm>	involves: 129 * C57BL/6J	MGI:2451150	hm	limb grasping
Camk4<tm1Arm>/Camk4<tm1Arm>	involves: 129 * C57BL/6J	MGI:2451150	hm	male infertility
Camk4<tm1Arm>/Camk4<tm1Arm>	involves: 129 * C57BL/6J	MGI:2451150	hm	oligozoospermia
Camk4<tm1Arm>/Camk4<tm1Arm>	involves: 129 * C57BL/6J	MGI:2451150	hm	polyovular ovarian follicle
Camk4<tm1Arm>/Camk4<tm1Arm>	involves: 129 * C57BL/6J	MGI:2451150	hm	premature death
Camk4<tm1Arm>/Camk4<tm1Arm>	involves: 129 * C57BL/6J	MGI:2451150	hm	reduced female fertility
Camk4<tm1Arm>/Camk4<tm1Arm>	involves: 129 * C57BL/6J	MGI:2451150	hm	seminiferous tubule degeneration
Camk4<tm1Arm>/Camk4<tm1Arm>	involves: 129 * C57BL/6J	MGI:2451150	hm	teratozoospermia
Camk4<tm1Arm>/Camk4<tm1Arm>	involves: 129 * C57BL/6J	MGI:2451150	hm	tremors
Camk4<tm1Tch>/Camk4<tm1Tch>	B6.129X1-Camk4<tm1Tch>	MGI:3794864	hm	abnormal bone remodeling
Camk4<tm1Tch>/Camk4<tm1Tch>	B6.129X1-Camk4<tm1Tch>	MGI:3794864	hm	abnormal inhibitory postsynaptic currents
Camk4<tm1Tch>/Camk4<tm1Tch>	B6.129X1-Camk4<tm1Tch>	MGI:3794864	hm	abnormal learning/memory/conditioning
Camk4<tm1Tch>/Camk4<tm1Tch>	B6.129X1-Camk4<tm1Tch>	MGI:3794864	hm	abnormal osteoclast differentiation
Camk4<tm1Tch>/Camk4<tm1Tch>	B6.129X1-Camk4<tm1Tch>	MGI:3794864	hm	decreased chemically-elicited antinociception
Camk4<tm1Tch>/Camk4<tm1Tch>	B6.129X1-Camk4<tm1Tch>	MGI:3794864	hm	decreased osteoclast cell number
Camk4<tm1Tch>/Camk4<tm1Tch>	B6.129X1-Camk4<tm1Tch>	MGI:3794864	hm	impaired conditioned place preference behavior
Camk4<tm1Tch>/Camk4<tm1Tch>	B6.129X1-Camk4<tm1Tch>	MGI:3794864	hm	increased bone mineral density
Camk4<tm1Tch>/Camk4<tm1Tch>	B6.129X1-Camk4<tm1Tch>	MGI:3794864	hm	increased bone volume
Camk4<tm1Tch>/Camk4<tm1Tch>	involves: 129X1/SvJ * C57BL/6	MGI:3794860	hm	abnormal excitatory postsynaptic currents
Camk4<tm1Tch>/Camk4<tm1Tch>	involves: 129X1/SvJ * C57BL/6	MGI:3794860	hm	abnormal locomotor activation
Camk4<tm1Tch>/Camk4<tm1Tch>	involves: 129X1/SvJ * C57BL/6	MGI:3794860	hm	abnormal Purkinje cell dendrite morphology
Camk4<tm1Tch>/Camk4<tm1Tch>	involves: 129X1/SvJ * C57BL/6	MGI:3794860	hm	behavior/neurological phenotype
Camk4<tm1Tch>/Camk4<tm1Tch>	involves: 129X1/SvJ * C57BL/6	MGI:3794860	hm	nervous system phenotype
Camk4<tm1Tch>/Camk4<tm1Tch>	involves: 129X1/SvJ * C57BL/6	MGI:3794860	hm	reduced long term depression
Camk4<tm1Tsmi>/Camk4<tm1Tsmi>	B6N.129S-Camk4<tm1Tsmi>	MGI:4443001	hm	abnormal behavior
Camk4<tm1Tsmi>/Camk4<tm1Tsmi>	B6N.129S-Camk4<tm1Tsmi>	MGI:4443001	hm	behavior/neurological phenotype
Camk4<tm1Tsmi>/Camk4<tm1Tsmi>	B6N.129S-Camk4<tm1Tsmi>	MGI:4443001	hm	decreased anxiety-related response
Camk4<tm1Tsmi>/Camk4<tm1Tsmi>	B6N.129S-Camk4<tm1Tsmi>	MGI:4443001	hm	decreased body weight
Camk4<tm1Tsmi>/Camk4<tm1Tsmi>	B6N.129S-Camk4<tm1Tsmi>	MGI:4443001	hm	impaired contextual conditioning behavior
Camk4<tm1Tsmi>/Camk4<tm1Tsmi>	B6N.129S-Camk4<tm1Tsmi>	MGI:4443001	hm	impaired cued conditioning behavior
Camk4<tm2Arm>/Camk4<tm2Arm>	involves: 129 * C57BL/6J	MGI:3034061	hm	no abnormal phenotype detected
Cbln1<tm1Jim>/Cbln1<tm1Jim>	involves: 129S7/SvEvBrd	MGI:3610545	hm	abnormal cerebellar granule layer morphology
Cbln1<tm1Jim>/Cbln1<tm1Jim>	involves: 129S7/SvEvBrd	MGI:3610545	hm	abnormal excitatory postsynaptic currents
Cbln1<tm1Jim>/Cbln1<tm1Jim>	involves: 129S7/SvEvBrd	MGI:3610545	hm	abnormal gait
Cbln1<tm1Jim>/Cbln1<tm1Jim>	involves: 129S7/SvEvBrd	MGI:3610545	hm	abnormal long term depression
Cbln1<tm1Jim>/Cbln1<tm1Jim>	involves: 129S7/SvEvBrd	MGI:3610545	hm	abnormal Purkinje cell innervation
Cbln1<tm1Jim>/Cbln1<tm1Jim>	involves: 129S7/SvEvBrd	MGI:3610545	hm	ataxia
Cbln1<tm1Jim>/Cbln1<tm1Jim>	involves: 129S7/SvEvBrd	MGI:3610545	hm	impaired coordination
Cbln3<tm1Jim>/Cbln3<tm1Jim>	involves: 129S7/SvEvBrd	MGI:3697901	hm	no abnormal phenotype detected
Chn2<tm1.1Alk>/Chn2<tm1.1Alk>	involves: C57BL/6 * CD-1 * FVB/N	MGI:5433307	hm	abnormal axon pruning
Chn2<tm1.1Alk>/Chn2<tm1.1Alk>	involves: C57BL/6 * CD-1 * FVB/N	MGI:5433307	hm	abnormal hippocampus development
Crtam<tm1Achn>/Crtam<tm1Achn>	involves: 129 * C57BL/6	MGI:3834614	hm	abnormal CD4-positive, alpha-beta T cell physiology
Crtam<tm1Achn>/Crtam<tm1Achn>	involves: 129 * C57BL/6	MGI:3834614	hm	abnormal interleukin secretion
Crtam<tm1Achn>/Crtam<tm1Achn>	involves: 129 * C57BL/6	MGI:3834614	hm	abnormal T cell activation
Crtam<tm1Achn>/Crtam<tm1Achn>	involves: 129 * C57BL/6	MGI:3834614	hm	abnormal T-helper 1 physiology
Crtam<tm1Achn>/Crtam<tm1Achn>	involves: 129 * C57BL/6	MGI:3834614	hm	decreased interferon-gamma secretion
Crtam<tm1Achn>/Crtam<tm1Achn>	involves: 129 * C57BL/6	MGI:3834614	hm	decreased interleukin-17 secretion
Crtam<tm1Achn>/Crtam<tm1Achn>	involves: 129 * C57BL/6	MGI:3834614	hm	increased CD4-positive, alpha beta T cell number
Crtam<tm1Achn>/Crtam<tm1Achn>	involves: 129 * C57BL/6	MGI:3834614	hm	increased CD8-positive, alpha-beta T cell number
Crtam<tm1Achn>/Crtam<tm1Achn>	involves: 129 * C57BL/6	MGI:3834614	hm	increased susceptibility to bacterial infection
Crtam<tm1Achn>/Crtam<tm1Achn>	involves: 129 * C57BL/6	MGI:3834614	hm	increased T cell proliferation
Crtam<tm1Tks>/Crtam<tm1Tks>	B6.Cg-Crtam<tm1Tks>	MGI:4361582	hm	abnormal response to infection
Crtam<tm1Tks>/Crtam<tm1Tks>	B6.Cg-Crtam<tm1Tks>	MGI:4361582	hm	immune system phenotype
Erc1<tm1Sud>/Erc1<tm1Sud>	involves: 129S1/Sv * 129X1/SvJ * C57BL/6	MGI:3784818	hm	complete embryonic lethality
Fat2<tm1Anjm>/Fat2<tm1Anjm>	involves: 129P2/OlaHsd * C57BL/6	MGI:4421694	hm	no abnormal phenotype detected
Gabra6<tm1Geh>/Gabra6<tm1Geh>	involves: 129S1/Sv * 129X1/SvJ * C57BL/6	MGI:2177605	hm	abnormal xenobiotic pharmacokinetics
Gabra6<tm1Geh>/Gabra6<tm1Geh>	involves: 129S1/Sv * 129X1/SvJ * C57BL/6	MGI:2177605	hm	behavior/neurological phenotype
Gabra6<tm1Geh>/Gabra6<tm1Geh>	involves: 129S1/Sv * 129X1/SvJ * C57BL/6	MGI:2177605	hm	homeostasis/metabolism phenotype
Gabra6<tm1Geh>/Gabra6<tm1Geh>	involves: 129S1/Sv * 129X1/SvJ * C57BL/6	MGI:2177605	hm	nervous system phenotype
Gabra6<tm1Wwis>/Gabra6<tm1Wwis>	involves: 129S/SvEv * C57BL/6	MGI:3713528	hm	hearing/vestibular/ear phenotype
Gabra6<tm1Wwis>/Gabra6<tm1Wwis>	involves: 129S/SvEv * C57BL/6J	MGI:2679948	hm	behavior/neurological phenotype
Gria4<tm1.1Mony>/Gria4<tm1.1Mony>	involves: 129S1/Sv * 129X1/SvJ * C57BL/6	MGI:3804915	hm	abnormal action potential
Gria4<tm1.1Mony>/Gria4<tm1.1Mony>	involves: 129S1/Sv * 129X1/SvJ * C57BL/6	MGI:3804915	hm	abnormal AMPA-mediated synaptic currents
Gria4<tm1.1Mony>/Gria4<tm1.1Mony>	involves: 129S1/Sv * 129X1/SvJ * C57BL/6	MGI:3804915	hm	abnormal excitatory postsynaptic potential
Gria4<tm1.1Mony>/Gria4<tm1.1Mony>	involves: 129S1/Sv * 129X1/SvJ * C57BL/6	MGI:3804915	hm	abnormal inhibitory postsynaptic potential
Gria4<tm1.1Mony>/Gria4<tm1.1Mony>	involves: 129S1/Sv * 129X1/SvJ * C57BL/6	MGI:3804915	hm	abnormal nervous system electrophysiology
Gria4<tm1.1Mony>/Gria4<tm1.1Mony>	involves: 129S1/Sv * 129X1/SvJ * C57BL/6	MGI:3804915	hm	abnormal neuron physiology
Gria4<tm1.1Mony>/Gria4<tm1.1Mony>	involves: 129S1/Sv * 129X1/SvJ * C57BL/6	MGI:3804915	hm	abnormal object recognition memory
Gria4<tm1.1Mony>/Gria4<tm1.1Mony>	involves: 129S1/Sv * 129X1/SvJ * C57BL/6	MGI:3804915	hm	abnormal spatial working memory
Gria4<tm1.1Mony>/Gria4<tm1.1Mony>	involves: 129S1/Sv * 129X1/SvJ * C57BL/6	MGI:3804915	hm	decreased exploration in new environment
Gria4<tm1.1Mony>/Gria4<tm1.1Mony>	involves: 129S1/Sv * 129X1/SvJ * C57BL/6	MGI:3804915	hm	decreased vertical activity
Gria4<tm1.1Mony>/Gria4<tm1.1Mony>	involves: 129S1/Sv * 129X1/SvJ * C57BL/6	MGI:3804915	hm	impaired ability to fire action potentials
Gria4<tm1Dgen>/Gria4<tm1Dgen>	involves: 129P2/OlaHsd * C57BL/6	MGI:3606457	hm	abnormal seizure response to pharmacological agent
Gria4<tm1Dgen>/Gria4<tm1Dgen>	involves: 129P2/OlaHsd * C57BL/6	MGI:3606457	hm	hyperactivity
Gria4<tm1Dgen>/Gria4<tm1Dgen>	involves: 129P2/OlaHsd * C57BL/6	MGI:3606457	hm	increased thermal nociceptive threshold
Gria4<tm1Dgen>/Gria4<tm1Dgen>	involves: 129P2/OlaHsd * C57BL/6J	MGI:3795133	hm	absence seizures
Gria4<tm1Ksak>/Gria4<tm1Ksak>	Not Specified	MGI:4949283	hm	no phenotypic analysis
Gria4<tm1Rlh>/Gria4<tm1Rlh>	involves: 129S1/Sv * 129X1/SvJ * C57BL/6	MGI:3716313	hm	nervous system phenotype
Gria4<tm1Yfkk>/Gria4<tm1Yfkk>	B6.129S-Gria4<tm1Yfkk>	MGI:5298026	hm	abnormal social investigation
Gria4<tm1Yfkk>/Gria4<tm1Yfkk>	B6.129S-Gria4<tm1Yfkk>	MGI:5298026	hm	abnormal spatial reference memory
Gria4<tm1Yfkk>/Gria4<tm1Yfkk>	B6.129S-Gria4<tm1Yfkk>	MGI:5298026	hm	abnormal spatial working memory
Gria4<tm1Yfkk>/Gria4<tm1Yfkk>	B6.129S-Gria4<tm1Yfkk>	MGI:5298026	hm	behavior/neurological phenotype
Gria4<tm1Yfkk>/Gria4<tm1Yfkk>	B6.129S-Gria4<tm1Yfkk>	MGI:5298026	hm	decreased body weight
Gria4<tm1Yfkk>/Gria4<tm1Yfkk>	B6.129S-Gria4<tm1Yfkk>	MGI:5298026	hm	decreased grip strength
Gria4<tm1Yfkk>/Gria4<tm1Yfkk>	B6.129S-Gria4<tm1Yfkk>	MGI:5298026	hm	decreased prepulse inhibition
Gria4<tm1Yfkk>/Gria4<tm1Yfkk>	B6.129S-Gria4<tm1Yfkk>	MGI:5298026	hm	decreased startle reflex
Gria4<tm1Yfkk>/Gria4<tm1Yfkk>	B6.129S-Gria4<tm1Yfkk>	MGI:5298026	hm	decreased vertical activity
Gria4<tm1Yfkk>/Gria4<tm1Yfkk>	B6.129S-Gria4<tm1Yfkk>	MGI:5298026	hm	increased anxiety-related response
Gria4<tm1Yfkk>/Gria4<tm1Yfkk>	B6.129S-Gria4<tm1Yfkk>	MGI:5298026	hm	increased physiological sensitivity to xenobiotic
Gria4<tm1Yfkk>/Gria4<tm1Yfkk>	B6.129S-Gria4<tm1Yfkk>	MGI:5298026	hm	increased vertical activity
Gria4<tm1Yfkk>/Gria4<tm1Yfkk>	B6.129S-Gria4<tm1Yfkk>	MGI:5298026	hm	induced hyperactivity
Gria4<tm1Yfkk>/Gria4<tm1Yfkk>	B6.129S-Gria4<tm1Yfkk>	MGI:5298026	hm	nervous system phenotype
Grid2<tm1(cre)Mwa>/Grid2<tm1(cre)Mwa>	involves: C57BL/6N	MGI:4949279	hm	abnormal eye movement
Grid2<tm1(cre)Mwa>/Grid2<tm1(cre)Mwa>	involves: C57BL/6N	MGI:4949279	hm	nervous system phenotype
Grid2<tm1(cre)Mwa>/Grid2<tm1(cre)Mwa>	involves: C57BL/6N	MGI:4949279	hm	Spinocerebellar Ataxia, Autosomal Recessive 18
Grid2<tm1Mim>/Grid2<tm1Mim>	B6.Cg-Grid2<tm1Mim>	MGI:4943910	hm	abnormal action potential
Grid2<tm1Mim>/Grid2<tm1Mim>	B6.Cg-Grid2<tm1Mim>	MGI:4943910	hm	abnormal eye blink conditioning behavior
Grid2<tm1Mim>/Grid2<tm1Mim>	B6.Cg-Grid2<tm1Mim>	MGI:4943910	hm	abnormal eye movement
Grid2<tm1Mim>/Grid2<tm1Mim>	B6.Cg-Grid2<tm1Mim>	MGI:4943910	hm	abnormal optokinetic reflex
Grid2<tm1Mim>/Grid2<tm1Mim>	B6.Cg-Grid2<tm1Mim>	MGI:4943910	hm	abnormal reflex
Grid2<tm1Mim>/Grid2<tm1Mim>	B6.Cg-Grid2<tm1Mim>	MGI:4943910	hm	abnormal vestibuloocular reflex
Grid2<tm1Mim>/Grid2<tm1Mim>	B6.Cg-Grid2<tm1Mim>	MGI:4943910	hm	impaired coordination
Grid2<tm1Mim>/Grid2<tm1Mim>	B6.Cg-Grid2<tm1Mim>	MGI:4943910	hm	increased prepulse inhibition
Grid2<tm1Mim>/Grid2<tm1Mim>	involves: C57BL/6 * CBA	MGI:3699325	hm	abnormal cerebellar molecular layer
Grid2<tm1Mim>/Grid2<tm1Mim>	involves: C57BL/6 * CBA	MGI:3699325	hm	abnormal cerebellum morphology
Grid2<tm1Mim>/Grid2<tm1Mim>	involves: C57BL/6 * CBA	MGI:3699325	hm	abnormal CNS synapse formation
Grid2<tm1Mim>/Grid2<tm1Mim>	involves: C57BL/6 * CBA	MGI:3699325	hm	abnormal CNS synaptic transmission
Grid2<tm1Mim>/Grid2<tm1Mim>	involves: C57BL/6 * CBA	MGI:3699325	hm	abnormal excitatory postsynaptic currents
Grid2<tm1Mim>/Grid2<tm1Mim>	involves: C57BL/6 * CBA	MGI:3699325	hm	abnormal GABA-mediated receptor currents
Grid2<tm1Mim>/Grid2<tm1Mim>	involves: C57BL/6 * CBA	MGI:3699325	hm	abnormal gait
Grid2<tm1Mim>/Grid2<tm1Mim>	involves: C57BL/6 * CBA	MGI:3699325	hm	abnormal locomotor activation
Grid2<tm1Mim>/Grid2<tm1Mim>	involves: C57BL/6 * CBA	MGI:3699325	hm	abnormal miniature inhibitory postsynaptic currents
Grid2<tm1Mim>/Grid2<tm1Mim>	involves: C57BL/6 * CBA	MGI:3699325	hm	abnormal motor coordination/ balance
Grid2<tm1Mim>/Grid2<tm1Mim>	involves: C57BL/6 * CBA	MGI:3699325	hm	abnormal Purkinje cell innervation
Grid2<tm1Mim>/Grid2<tm1Mim>	involves: C57BL/6 * CBA	MGI:3699325	hm	abnormal Purkinje cell morphology
Grid2<tm1Mim>/Grid2<tm1Mim>	involves: C57BL/6 * CBA	MGI:3699325	hm	abnormal response to injury
Grid2<tm1Mim>/Grid2<tm1Mim>	involves: C57BL/6 * CBA	MGI:3699325	hm	absent long term depression
Grid2<tm1Mim>/Grid2<tm1Mim>	involves: C57BL/6 * CBA	MGI:3699325	hm	ataxia
Grid2<tm1Mim>/Grid2<tm1Mim>	involves: C57BL/6 * CBA	MGI:3699325	hm	decreased vertical activity
Grid2<tm1Mim>/Grid2<tm1Mim>	involves: C57BL/6 * CBA	MGI:3699325	hm	head tilt
Grid2<tm1Mim>/Grid2<tm1Mim>	involves: C57BL/6 * CBA	MGI:3699325	hm	hypoactivity
Grid2<tm1Mim>/Grid2<tm1Mim>	involves: C57BL/6 * CBA	MGI:3699325	hm	impaired coordination
Grid2<tm1Mim>/Grid2<tm1Mim>	involves: C57BL/6 * CBA	MGI:3699325	hm	impaired righting response
Grid2<tm1Mim>/Grid2<tm1Mim>	involves: C57BL/6 * CBA	MGI:3699325	hm	thin cerebellar molecular layer
Grid2<tm2Msmh>/Grid2<tm2Msmh>	C57BL/6-Grid2<tm2Msmh>	MGI:3851247	hm	abnormal Purkinje cell dendrite morphology
Grid2<tm2Msmh>/Grid2<tm2Msmh>	C57BL/6-Grid2<tm2Msmh>	MGI:3851247	hm	abnormal synapse morphology
Grid2<tm2Msmh>/Grid2<tm2Msmh>	C57BL/6-Grid2<tm2Msmh>	MGI:3851247	hm	behavior/neurological phenotype
Grm4<tm1Dgen>/Grm4<tm1Dgen>	involves: 129P2/OlaHsd * C57BL/6J	MGI:5427825	hm	increased prepulse inhibition
Grm4<tm1Hpn>/Grm4<tm1Hpn>	involves: 129S1/Sv * 129X1/SvJ * CD-1	MGI:2176742	hm	abnormal motor learning
Grm4<tm1Hpn>/Grm4<tm1Hpn>	involves: 129S1/Sv * 129X1/SvJ * CD-1	MGI:2176742	hm	decreased paired-pulse facilitation
Grm4<tm1Hpn>/Grm4<tm1Hpn>	involves: 129S1/Sv * 129X1/SvJ * CD-1	MGI:2176742	hm	decreased post-tetanic potentiation
Icmt<tm1Hzo>/Icmt<tm1Hzo>	involves: 129S/SvEv	MGI:2668376	hm	abnormal definitive hematopoiesis
Icmt<tm1Hzo>/Icmt<tm1Hzo>	involves: 129S/SvEv	MGI:2668376	hm	abnormal liver bud morphology
Icmt<tm1Hzo>/Icmt<tm1Hzo>	involves: 129S/SvEv	MGI:2668376	hm	abnormal liver development
Icmt<tm1Hzo>/Icmt<tm1Hzo>	involves: 129S/SvEv	MGI:2668376	hm	absent liver
Icmt<tm1Hzo>/Icmt<tm1Hzo>	involves: 129S/SvEv	MGI:2668376	hm	complete embryonic lethality during organogenesis
Icmt<tm1Hzo>/Icmt<tm1Hzo>	involves: 129S/SvEv	MGI:2668376	hm	decreased embryo size
Icmt<tm1Hzo>/Icmt<tm1Hzo>	involves: 129S/SvEv	MGI:2668376	hm	delayed hepatic development
Icmt<tm1Hzo>/Icmt<tm1Hzo>	involves: 129S/SvEv	MGI:2668376	hm	increased forebrain apoptosis
Icmt<tm1Hzo>/Icmt<tm1Hzo>	involves: 129S/SvEv	MGI:2668376	hm	increased neural tube apoptosis
Icmt<tm1Hzo>/Icmt<tm1Hzo>	involves: 129S/SvEv	MGI:2668376	hm	pallor
Icmt<tm1Sgy>/Icmt<tm1Sgy>	Not Specified	MGI:2681646	hm	complete embryonic lethality during organogenesis
Icmt<tm1Sgy>/Icmt<tm1Sgy>	Not Specified	MGI:2681646	hm	decreased body size
Il22<tm1.1Lex>/Il22<tm1.1Lex>	involves: 129S5/SvEvBrd	MGI:4459521	hm	abnormal circulating cytokine level
Il22<tm1.1Lex>/Il22<tm1.1Lex>	involves: 129S5/SvEvBrd	MGI:4459521	hm	abnormal colon morphology
Il22<tm1.1Lex>/Il22<tm1.1Lex>	involves: 129S5/SvEvBrd	MGI:4459521	hm	abnormal large intestine crypts of Lieberkuhn morphology
Il22<tm1.1Lex>/Il22<tm1.1Lex>	involves: 129S5/SvEvBrd	MGI:4459521	hm	colitis
Il22<tm1.1Lex>/Il22<tm1.1Lex>	involves: 129S5/SvEvBrd	MGI:4459521	hm	decreased body weight
Il22<tm1.1Lex>/Il22<tm1.1Lex>	involves: 129S5/SvEvBrd	MGI:4459521	hm	decreased circulating interleukin-12b level
Il22<tm1.1Lex>/Il22<tm1.1Lex>	involves: 129S5/SvEvBrd	MGI:4459521	hm	decreased circulating interleukin-12 level
Il22<tm1.1Lex>/Il22<tm1.1Lex>	involves: 129S5/SvEvBrd	MGI:4459521	hm	decreased circulating interleukin-1 alpha level
Il22<tm1.1Lex>/Il22<tm1.1Lex>	involves: 129S5/SvEvBrd	MGI:4459521	hm	decreased circulating tumor necrosis factor level
Il22<tm1.1Lex>/Il22<tm1.1Lex>	involves: 129S5/SvEvBrd	MGI:4459521	hm	increased circulating interleukin-17 level
Il22<tm1.1Lex>/Il22<tm1.1Lex>	involves: 129S5/SvEvBrd	MGI:4459521	hm	increased susceptibility to bacterial infection induced morbidity/mortality
Il22<tm1.1Lex>/Il22<tm1.1Lex>	involves: 129S5/SvEvBrd	MGI:4459521	hm	increased susceptibility to fungal infection
Il22<tm1.1Lex>/Il22<tm1.1Lex>	involves: 129S5/SvEvBrd	MGI:4459521	hm	lung inflammation
Il22<tm1.1Lex>/Il22<tm1.1Lex>	involves: 129S5/SvEvBrd	MGI:4459521	hm	multifocal hepatic necrosis
Il22<tm1.1Lex>/Il22<tm1.1Lex>	involves: 129S5/SvEvBrd * C57BL/6	MGI:3700050	hm	abnormal cytokine secretion
Il22<tm1.1Lex>/Il22<tm1.1Lex>	involves: 129S5/SvEvBrd * C57BL/6	MGI:3700050	hm	acanthosis
Il22<tm1.1Lex>/Il22<tm1.1Lex>	involves: 129S5/SvEvBrd * C57BL/6	MGI:3700050	hm	ear inflammation
Il22<tm1.1Lex>/Il22<tm1.1Lex>	involves: 129S5/SvEvBrd * C57BL/6	MGI:3700050	hm	mixed cellular infiltration to dermis
Il22<tm1.1Lex>/Il22<tm1.1Lex>	involves: 129S5/SvEvBrd * C57BL/6	MGI:3700050	hm	thick dermal layer
Il22<tm1Flv>/Il22<tm1Flv>	B6.Cg-Il22<tm1Flv>	MGI:3761616	hm	increased circulating alanine transaminase level
Il22<tm1Flv>/Il22<tm1Flv>	B6.Cg-Il22<tm1Flv>	MGI:3761616	hm	increased circulating aspartate transaminase level
Il22<tm1Flv>/Il22<tm1Flv>	B6.Cg-Il22<tm1Flv>	MGI:3761616	hm	increased physiological sensitivity to xenobiotic
Il22<tm1Flv>/Il22<tm1Flv>	B6.Cg-Il22<tm1Flv>	MGI:3761616	hm	increased susceptibility to endotoxin shock
Il22<tm1Flv>/Il22<tm1Flv>	B6.Cg-Il22<tm1Flv>	MGI:3761616	hm	liver inflammation
Il22<tm1Flv>/Il22<tm1Flv>	involves: 129/Sv * C57BL/6	MGI:5446698	hm	increased incidence of tumors by chemical induction
Il22<tm1Flv>/Il22<tm1Flv>	involves: 129/Sv * C57BL/6	MGI:5446698	hm	increased susceptibility to induced colitis
Il22<tm1Jcrd>/Il22<tm1Jcrd>	B6.Cg-Il22<tm1Jcrd>	MGI:4453829	hm	immune system phenotype
Il22<tm1Jcrd>/Il22<tm1Jcrd>	Not Specified	MGI:5476735	hm	decreased neutrophil cell number
Il22<tm1Jcrd>/Il22<tm1Jcrd>	Not Specified	MGI:5476735	hm	decreased physiological sensitivity to xenobiotic
Il22<tm1Jcrd>/Il22<tm1Jcrd>	Not Specified	MGI:5476735	hm	increased interleukin-17 secretion
Il22<tm1Vlcg>/Il22<tm1Vlcg>	Not Specified	MGI:5509383	hm	abnormal skin morphology
Il22<tm1Vlcg>/Il22<tm1Vlcg>	Not Specified	MGI:5509383	hm	abnormal wound healing
Il22<tm1Vlcg>/Il22<tm1Vlcg>	Not Specified	MGI:5509383	hm	delayed wound healing
Mmp24<tm1Otin>/Mmp24<tm1Otin>	involves: 129P2/OlaHsd * C57BL/6J	MGI:4365394	hm	abnormal axon extension
Mmp24<tm1Otin>/Mmp24<tm1Otin>	involves: 129P2/OlaHsd * C57BL/6J	MGI:4365394	hm	abnormal axon morphology
Mmp24<tm1Otin>/Mmp24<tm1Otin>	involves: 129P2/OlaHsd * C57BL/6J	MGI:4365394	hm	abnormal mast cell degranulation
Mmp24<tm1Otin>/Mmp24<tm1Otin>	involves: 129P2/OlaHsd * C57BL/6J	MGI:4365394	hm	abnormal nociception after inflammation
Mmp24<tm1Otin>/Mmp24<tm1Otin>	involves: 129P2/OlaHsd * C57BL/6J	MGI:4365394	hm	decreased thermal nociceptive threshold
Mmp24<tm1Otin>/Mmp24<tm1Otin>	involves: 129P2/OlaHsd * C57BL/6J	MGI:4365394	hm	increased mast cell degranulation
Mmp24<tm1Ski>/Mmp24<tm1Ski>	involves: 129P2/OlaHsd * C57BL/6J	MGI:3029892	hm	abnormal mechanical nociception
Mmp24<tm1Ski>/Mmp24<tm1Ski>	involves: 129P2/OlaHsd * C57BL/6J	MGI:3029892	hm	abnormal pain threshold
Mmp24<tm1Ski>/Mmp24<tm1Ski>	involves: 129P2/OlaHsd * C57BL/6J	MGI:3029892	hm	abnormal reflex
Mmp24<tm1Ski>/Mmp24<tm1Ski>	involves: 129P2/OlaHsd * C57BL/6J	MGI:3029892	hm	abnormal spinal cord morphology
Mmp24<tm1Ski>/Mmp24<tm1Ski>	involves: 129P2/OlaHsd * C57BL/6J	MGI:3029892	hm	decreased anxiety-related response
Mmp24<tm1Ski>/Mmp24<tm1Ski>	involves: 129P2/OlaHsd * C57BL/6J	MGI:3029892	hm	enhanced coordination
Neurod1<tm1Jle>/Neurod1<tm1Jle>	involves: 129S4/SvJaeSor * C57BL/6	MGI:3057125	hm	abnormal amacrine cell morphology
Neurod1<tm1Jle>/Neurod1<tm1Jle>	involves: 129S4/SvJaeSor * C57BL/6	MGI:3057125	hm	abnormal Muller cell morphology
Neurod1<tm1Jle>/Neurod1<tm1Jle>	involves: 129S4/SvJaeSor * C57BL/6	MGI:3057125	hm	abnormal retinal apoptosis
Neurod1<tm1Jle>/Neurod1<tm1Jle>	involves: 129S4/SvJaeSor * C57BL/6	MGI:3057125	hm	abnormal retinal bipolar cell morphology
Neurod1<tm1Jle>/Neurod1<tm1Jle>	involves: 129S4/SvJaeSor * C57BL/6	MGI:3057125	hm	complete postnatal lethality
Neurod1<tm1Jle>/Neurod1<tm1Jle>	involves: 129S4/SvJaeSor * C57BL/6	MGI:3057125	hm	hyperglycemia
Neurod1<tm1Jle>/Neurod1<tm1Jle>	involves: 129S4/SvJaeSor * ICR	MGI:4420917	hm	abnormal retinal apoptosis
Neurod1<tm1Mjts>/Neurod1<tm1Mjts>	involves: 129S7/SvEvBrd * 129X1/SvJ * C57BL/6J	MGI:4940063	hm	abnormal brain wave pattern
Neurod1<tm1Mjts>/Neurod1<tm1Mjts>	involves: 129S7/SvEvBrd * 129X1/SvJ * C57BL/6J	MGI:4940063	hm	abnormal cerebellum morphology
Neurod1<tm1Mjts>/Neurod1<tm1Mjts>	involves: 129S7/SvEvBrd * 129X1/SvJ * C57BL/6J	MGI:4940063	hm	abnormal dentate gyrus morphology
Neurod1<tm1Mjts>/Neurod1<tm1Mjts>	involves: 129S7/SvEvBrd * 129X1/SvJ * C57BL/6J	MGI:4940063	hm	abnormal head movements
Neurod1<tm1Mjts>/Neurod1<tm1Mjts>	involves: 129S7/SvEvBrd * 129X1/SvJ * C57BL/6J	MGI:4940063	hm	abnormal hippocampus CA4 region morphology
Neurod1<tm1Mjts>/Neurod1<tm1Mjts>	involves: 129S7/SvEvBrd * 129X1/SvJ * C57BL/6J	MGI:4940063	hm	abnormal hippocampus development
Neurod1<tm1Mjts>/Neurod1<tm1Mjts>	involves: 129S7/SvEvBrd * 129X1/SvJ * C57BL/6J	MGI:4940063	hm	abnormal hippocampus granule cell layer
Neurod1<tm1Mjts>/Neurod1<tm1Mjts>	involves: 129S7/SvEvBrd * 129X1/SvJ * C57BL/6J	MGI:4940063	hm	abnormal hippocampus granule cell morphology
Neurod1<tm1Mjts>/Neurod1<tm1Mjts>	involves: 129S7/SvEvBrd * 129X1/SvJ * C57BL/6J	MGI:4940063	hm	abnormal hippocampus morphology
Neurod1<tm1Mjts>/Neurod1<tm1Mjts>	involves: 129S7/SvEvBrd * 129X1/SvJ * C57BL/6J	MGI:4940063	hm	ataxia
Neurod1<tm1Mjts>/Neurod1<tm1Mjts>	involves: 129S7/SvEvBrd * 129X1/SvJ * C57BL/6J	MGI:4940063	hm	circling
Neurod1<tm1Mjts>/Neurod1<tm1Mjts>	involves: 129S7/SvEvBrd * 129X1/SvJ * C57BL/6J	MGI:4940063	hm	homeostasis/metabolism phenotype
Neurod1<tm1Mjts>/Neurod1<tm1Mjts>	involves: 129S7/SvEvBrd * 129X1/SvJ * C57BL/6J	MGI:4940063	hm	hyperactivity
Neurod1<tm1Mjts>/Neurod1<tm1Mjts>	involves: 129S7/SvEvBrd * 129X1/SvJ * C57BL/6J	MGI:4940063	hm	hyperglycemia
Neurod1<tm1Mjts>/Neurod1<tm1Mjts>	involves: 129S7/SvEvBrd * 129X1/SvJ * C57BL/6J	MGI:4940063	hm	partial postnatal lethality
Neurod1<tm1Mjts>/Neurod1<tm1Mjts>	involves: 129S7/SvEvBrd * 129X1/SvJ * C57BL/6J	MGI:4940063	hm	seizures
Neurod1<tm1Mjts>/Neurod1<tm1Mjts>	involves: 129S7/SvEvBrd * 129X1/SvJ * C57BL/6J	MGI:4940063	hm	sporadic seizures
Neurod1<tm1Mjts>/Neurod1<tm1Mjts>	involves: 129S7/SvEvBrd * 129X1/SvJ * C57BL/6J	MGI:4940063	hm	tonic-clonic seizures
Neurod1<tm1Mjts>/Neurod1<tm1Mjts>	involves: 129S7/SvEvBrd * C57BL/6	MGI:2174973	hm	abnormal intestinal enteroendocrine cell morphology
Neurod1<tm1Mjts>/Neurod1<tm1Mjts>	involves: 129S7/SvEvBrd * C57BL/6	MGI:2174973	hm	abnormal intestinal mucosa morphology
Neurod1<tm1Mjts>/Neurod1<tm1Mjts>	involves: 129S7/SvEvBrd * C57BL/6	MGI:2174973	hm	abnormal pancreatic acinar cell morphology
Neurod1<tm1Mjts>/Neurod1<tm1Mjts>	involves: 129S7/SvEvBrd * C57BL/6	MGI:2174973	hm	abnormal pancreatic beta cell morphology
Neurod1<tm1Mjts>/Neurod1<tm1Mjts>	involves: 129S7/SvEvBrd * C57BL/6	MGI:2174973	hm	absent pancreatic islets
Neurod1<tm1Mjts>/Neurod1<tm1Mjts>	involves: 129S7/SvEvBrd * C57BL/6	MGI:2174973	hm	complete postnatal lethality
Neurod1<tm1Mjts>/Neurod1<tm1Mjts>	involves: 129S7/SvEvBrd * C57BL/6	MGI:2174973	hm	decreased body size
Neurod1<tm1Mjts>/Neurod1<tm1Mjts>	involves: 129S7/SvEvBrd * C57BL/6	MGI:2174973	hm	decreased pancreatic alpha cell number
Neurod1<tm1Mjts>/Neurod1<tm1Mjts>	involves: 129S7/SvEvBrd * C57BL/6	MGI:2174973	hm	decreased pancreatic beta cell number
Neurod1<tm1Mjts>/Neurod1<tm1Mjts>	involves: 129S7/SvEvBrd * C57BL/6	MGI:2174973	hm	decreased pancreatic delta cell number
Neurod1<tm1Mjts>/Neurod1<tm1Mjts>	involves: 129S7/SvEvBrd * C57BL/6	MGI:2174973	hm	dehydration
Neurod1<tm1Mjts>/Neurod1<tm1Mjts>	involves: 129S7/SvEvBrd * C57BL/6	MGI:2174973	hm	Diabetes Mellitus, Insulin-Dependent, 7
Neurod1<tm1Mjts>/Neurod1<tm1Mjts>	involves: 129S7/SvEvBrd * C57BL/6	MGI:2174973	hm	hyperglycemia
Neurod1<tm1Mjts>/Neurod1<tm1Mjts>	involves: 129S7/SvEvBrd * C57BL/6	MGI:2174973	hm	increased pancreas apoptosis
Neurod1<tm1Mjts>/Neurod1<tm1Mjts>	involves: 129S7/SvEvBrd * C57BL/6	MGI:2174973	hm	ketoaciduria
Neurod1<tm1Mjts>/Neurod1<tm1Mjts>	involves: 129S7/SvEvBrd * C57BL/6	MGI:2174973	hm	pancreatic acinar cell zymogen granule accumulation
[truncated: 95 more rows]

## Sheet: 42_Neuronal NC & DS
Genotype symbol	Genotype Background	Genotype Primary Identifier	Genotype Zygosity	Ontology Annotation						MP term	p-value (Bonferroni 0.05)	Genotype	MP Ontology Term
[truncated: 231 more rows]

[truncated: 19 more sheets: 45_Neuronal neurons, 48_Neurons & lung, 53_Neuronal general, 56_Neuronal cerb & other, 59_Neuronal varib levels, 60_Neuronal general, 66_Neuronal DRG, 73_Neuronal general, 77_Neuronal general, 82_Olfactory bulb, 85_Microglia, 88_Neuronal DRG & other, 89_Neuronal variable, 90_Spinal cord & adult brain, 91_Myelin synthesis, 96_Variable nuc acc &, 99_Neuronal variable, 1_Testis, 14_Mitochondria]
