# Supplementary material for: Analysis of gene expression in the nervous system identifies key genes and novel candidates for health and disease
Source: Neurogenetics. 2017 Feb 11;18(2):81–95. doi: 10.1007/s10048-017-0509-5 (PMC5359387; doi:10.1007/s10048-017-0509-5)
Supplement: Supplementary file 6 — List of unannotated/minimally annotated genes associated with each of the clusters (XLSX 20 kb) [file 10048_2017_509_MOESM6_ESM.xlsx]

## Sheet: Sheet1
Analysis of gene expression in the nervous system identifies key genes and novel candidates for health and disease
Neurogenetics
Sarah M Carpanini, Thomas M Wishart, Thomas H Gillingwater, Jean C Manson and Kim M Summers
Corresponding author: Professor Kim M Summers The Roslin Institute and Royal (Dick) School of Veterinary Studies, University of Edinburgh, Easter Bush, Midlothian, EH25 9RG, UK; kim.summers@roslin.ed.ac.uk
	Gene name	Gene symbol	Gene Ontology Biological Process	Gene Ontology Cellular Component	Gene Ontology Molecular Function
Cluster005	RIKEN cDNA 2900011O08 gene	2900011O08Rik	---	---	0005515 // protein binding // inferred from physical interaction
	RIKEN cDNA A830039N20 gene	A830039N20Rik	---	---	---
	ankyrin repeat domain 34A	Ankrd34a	---	0005737 // cytoplasm // not recorded	0005515 // protein binding // inferred from electronic annotation
	expressed sequence AW060742	AW060742	---	---	---
	RIKEN cDNA B230217C12 gene	B230217C12Rik	---	---	---
	family with sequence similarity 69, member B	Fam69b	---	0005783 // endoplasmic reticulum // inferred from electronic annotation /// 0005789 // endoplasmic reticulum membrane // inferred from electronic annotation /// 0016020 // membrane // inferred from electronic annotation /// 0016021 // integral component of membrane // inferred from electronic annotation	---
	F-box protein 41	Fbxo41	---	---	0005515 // protein binding // inferred from electronic annotation
	ganglioside-induced differentiation-associated protein 1-like 1	Gdap1l1	---	---	0005515 // protein binding // inferred from electronic annotation
	golgi autoantigen, golgin subfamily a, 7B	Golga7b	---	0000139 // Golgi membrane // inferred from electronic annotation /// 0005794 // Golgi apparatus // inferred from electronic annotation /// 0016020 // membrane // inferred from electronic annotation	---
	FERM and PDZ domain-containing protein 3-like	LOC101055948	---	---	---
	piggyBac transposable element derived 5	Pgbd5	---	---	---
	RALY RNA binding protein-like	Ralyl	---	---	0000166 // nucleotide binding // inferred from electronic annotation /// 0003676 // nucleic acid binding // inferred from electronic annotation /// 0003723 // RNA binding // inferred from electronic annotation /// 0044822 // poly(A) RNA binding // not recorded
	SPRY domain containing 3	Spryd3	---	---	0005515 // protein binding // inferred from electronic annotation
	transmembrane protein 151A	Tmem151a	---	0016020 // membrane // inferred from electronic annotation /// 0016021 // integral component of membrane // inferred from electronic annotation	---
	transmembrane protein 179	Tmem179	---	0016020 // membrane // inferred from electronic annotation /// 0016021 // integral component of membrane // inferred from electronic annotation	---
	unc-80 homolog (C. elegans)	Unc80	---	0016020 // membrane // inferred from electronic annotation /// 0016021 // integral component of membrane // inferred from electronic annotation	---
	vacuolar protein sorting 13C (yeast)	Vps13c	---	0070062 // extracellular vesicular exosome // not recorded	---
	visinin-like 1	Vsnl1	---	---	0005509 // calcium ion binding // inferred from electronic annotation /// 0046872 // metal ion binding // inferred from electronic annotation
Cluster006	RIKEN cDNA 2310022B05 gene	2310022B05Rik	---	0005737 // cytoplasm // inferred from electronic annotation	---
	RIKEN cDNA 2900052N01 gene	2900052N01Rik	---	---	---
	RIKEN cDNA 4933431E20 gene	4933431E20Rik	---	---	---
	RIKEN cDNA 5930412G12 gene	5930412G12Rik	---	---	---
	RIKEN cDNA A730056I06 gene	A730056I06Rik	---	---	---
	Mus musculus non-coding RNA, oocyte_piRNA3172, complete sequence.	AB352356	---	---	---
	expressed sequence AW047730	AW047730	---	---	---
	brain and acute leukemia, cytoplasmic	Baalc	---	0005634 // nucleus // inferred from electronic annotation /// 0005737 // cytoplasm // inferred from direct assay /// 0005737 // cytoplasm // not recorded /// 0005813 // centrosome // inferred from electronic annotation /// 0016020 // membrane // inferred from electronic annotation	---
	predicted gene 13111	Gm13111	---	---	---
	predicted gene 5089	Gm5089	---	---	---
	predicted gene 6556	Gm6556	---	---	---
	Na+/K+ transporting ATPase interacting 4	Nkain4	---	0005886 // plasma membrane // inferred from electronic annotation /// 0016020 // membrane // inferred from electronic annotation /// 0016021 // integral component of membrane // inferred from electronic annotation	---
	olfactomedin-like 1	Olfml1	---	---	0005515 // protein binding // inferred from electronic annotation
	POU domain, class 3, transcription factor 3 adjacent noncoding transcript 1	Pantr1	---	---	---
	scavenger receptor class A, member 3	Scara3	---	0000139 // Golgi membrane // inferred from electronic annotation /// 0005581 // collagen trimer // inferred from electronic annotation /// 0005783 // endoplasmic reticulum // inferred from electronic annotation /// 0005789 // endoplasmic reticulum membrane // inferred from electronic annotation /// 0005794 // Golgi apparatus // inferred from electronic annotation /// 0016020 // membrane // inferr…	---
	TLC domain containing 1	Tlcd1	---	0005886 // plasma membrane // inferred from electronic annotation /// 0016020 // membrane // inferred from electronic annotation /// 0016021 // integral component of membrane // inferred from electronic annotation	---
	transmembrane protein 229A	Tmem229a	---	0016020 // membrane // inferred from electronic annotation /// 0016021 // integral component of membrane // inferred from electronic annotation	---
	transmembrane protein 47	Tmem47	---	0005886 // plasma membrane // not recorded /// 0005911 // cell-cell junction // inferred from direct assay /// 0016020 // membrane // inferred from electronic annotation /// 0016021 // integral component of membrane // inferred from electronic annotation /// 0030054 // cell junction // inferred from electronic annotation	---
Cluster014	RIKEN cDNA 1110001J03 gene	1110001J03Rik	---	0005739 // mitochondrion // inferred from direct assay	---
	ankyrin repeat domain 40	Ankrd40	---	---	0005515 // protein binding // inferred from electronic annotation
	apolipoprotein O	Apoo	---	0005739 // mitochondrion // not recorded /// 0016020 // membrane // inferred from electronic annotation /// 0016021 // integral component of membrane // inferred from electronic annotation	---
	DNA segment, Chr 10, Johns Hopkins University 81 expressed	D10Jhu81e	---	0005739 // mitochondrion // inferred from direct assay	---
	family with sequence similarity 210, member A	Fam210a	---	0005739 // mitochondrion // inferred from direct assay /// 0016020 // membrane // inferred from electronic annotation /// 0016021 // integral component of membrane // inferred from electronic annotation	---
	ubiquinol-cytochrome c reductase complex assembly factor 1	Uqcc1	---	0005739 // mitochondrion // inferred from direct assay /// 0016023 // cytoplasmic membrane-bounded vesicle // inferred from direct assay /// 0031410 // cytoplasmic vesicle // inferred from electronic annotation	---
Cluster027	RIKEN cDNA A330043J11 gene	A330043J11Rik	---	---	---
	cDNA sequence AF529169	AF529169	---	0016020 // membrane // inferred from electronic annotation /// 0016021 // integral component of membrane // inferred from electronic annotation	---
	RIKEN cDNA D930028M14 gene	D930028M14Rik	---	---	---
	predicted gene 2102	Gm2102	---	---	---
	kelch-like 5	Klhl5	---	---	0005515 // protein binding // inferred from electronic annotation
	phosphoinositide-interacting regulator of transient receptor potential channels	Pirt	---	0016020 // membrane // inferred from electronic annotation /// 0016021 // integral component of membrane // inferred from electronic annotation	---
	transmembrane protein 132E	Tmem132e	---	0016020 // membrane // inferred from electronic annotation /// 0016021 // integral component of membrane // inferred from electronic annotation	---
Cluster030	RIKEN cDNA 2900054C01 gene	2900054C01Rik	---	---	---
	RIKEN cDNA 2900055J20 gene	2900055J20Rik	---	---	---
	RIKEN cDNA A830010M20 gene	A830010M20Rik	---	---	---
	RIKEN cDNA D430041D05 gene	D430041D05Rik	---	---	---
	predicted gene 10419	Gm10419	---	---	---
	predicted gene 10699	Gm10699	---	---	---
	predicted gene 1976	Gm1976	---	---	---
	pecanex-like 2 (Drosophila)	Pcnxl2	---	0016020 // membrane // inferred from electronic annotation /// 0016021 // integral component of membrane // inferred from electronic annotation	---
	PILR alpha associated neural protein	Pianp	---	0016020 // membrane // inferred from electronic annotation /// 0016021 // integral component of membrane // inferred from electronic annotation	---
	small glutamine-rich tetratricopeptide repeat (TPR)-containing, beta	Sgtb	---	---	0005515 // protein binding // inferred from electronic annotation /// 0042803 // protein homodimerization activity // not recorded /// 0046982 // protein heterodimerization activity // not recorded
	SH3 domain containing ring finger 3	Sh3rf3	---	---	0005515 // protein binding // inferred from electronic annotation /// 0008270 // zinc ion binding // inferred from electronic annotation /// 0046872 // metal ion binding // inferred from electronic annotation
	transmembrane protein 191C	Tmem191c	---	0016020 // membrane // inferred from electronic annotation /// 0016021 // integral component of membrane // inferred from electronic annotation	---
Cluster035	RIKEN cDNA 9630013A20 gene	9630013A20Rik	---	---	---
	expressed sequence AI314604	AI314604	---	---	---
	RIKEN cDNA C530044C16 gene	C530044C16Rik	---	---	---
	family with sequence similarity 13, member C	Fam13c	---	---	---
	FERM domain containing 8	Frmd8	---	0005856 // cytoskeleton // inferred from electronic annotation	---
	lipoma HMGIC fusion partner-like 3	Lhfpl3	---	0016020 // membrane // inferred from electronic annotation /// 0016021 // integral component of membrane // inferred from electronic annotation	---
	SLAIN motif family, member 1	Slain1	---	---	---
	SOX2 overlapping transcript (non-protein coding)	Sox2ot	---	---	---
	transmembrane protein 125	Tmem125	---	0016020 // membrane // inferred from electronic annotation /// 0016021 // integral component of membrane // inferred from electronic annotation	---
	transmembrane protein 88B	Tmem88b	---	0016020 // membrane // inferred from electronic annotation /// 0016021 // integral component of membrane // inferred from electronic annotation	---
	tumor-suppressing subchromosomal transferable fragment 4	Tssc4	---	---	---
Cluster037	RIKEN cDNA 2900064K03 gene	2900064K03Rik	---	---	---
	RIKEN cDNA 9530056K15 gene	9530056K15Rik	---	---	---
	RIKEN cDNA 9630002A11 gene	9630002A11Rik	---	---	---
	RIKEN cDNA 9630005C17 gene	9630005C17Rik	---	---	---
	RIKEN cDNA A930017K11 gene	A930017K11Rik	---	---	---
	RIKEN cDNA C130075A20 gene	C130075A20Rik	---	---	---
	canopy 1 homolog (zebrafish)	Cnpy1	---	---	---
	DNA segment, Chr 4, ERATO Doi 298, expressed	D4Ertd298e	---	---	---
	predicted gene 2694	Gm2694	---	---	---
	predicted gene 5083	Gm5083	---	---	---
	LIM homeobox 1, opposite strand	Lhx1os	---	---	---
	zinc finger homeobox 2, opposite strand	Zfhx2os	---	---	---
Cluster042	RIKEN cDNA 2900018E21 gene	2900018E21Rik	---	---	---
	RIKEN cDNA 3110039M20 gene	3110039M20Rik	---	---	---
	RIKEN cDNA 9130230N09 gene /// uncharacterized LOC102635645	9130230N09Rik /// LOC102635645	---	---	---
	RIKEN cDNA 9330156P08 gene	9330156P08Rik	---	---	---
	RIKEN cDNA C030004M13 gene	C030004M13Rik	---	---	---
	RIKEN cDNA C030011L09 gene	C030011L09Rik	---	---	---
	predicted gene 10421	Gm10421	---	---	---
	GPRIN family member 3	Gprin3	---	---	---
	leucine rich repeat containing 10B	Lrrc10b	---	---	0005515 // protein binding // inferred from electronic annotation
Cluster045	RIKEN cDNA A930033H14 gene	A930033H14Rik	---	---	---
	glycine/arginine rich protein 1	Grrp1	---	---	---
	uncharacterized LOC102635316	LOC102635316	---	---	---
Cluster048	cysteine and tyrosine-rich protein 1	Cyyr1	---	0016020 // membrane // inferred from electronic annotation /// 0016021 // integral component of membrane // inferred from electronic annotation	---
	predicted gene, 20748	Gm20748	---	---	---
	HIG1 domain family, member 1B	Higd1b	---	0016020 // membrane // inferred from electronic annotation /// 0016021 // integral component of membrane // inferred from electronic annotation	---
	src homology 2 domain-containing transforming protein E	She	---	---	0005515 // protein binding // inferred from electronic annotation
	transmembrane 4 superfamily member 1	Tm4sf1	---	0005887 // integral component of plasma membrane // not recorded /// 0016020 // membrane // inferred from electronic annotation /// 0016021 // integral component of membrane // inferred from electronic annotation	---
	Usher syndrome 1C binding protein 1	Ushbp1	---	---	0005515 // protein binding // inferred from electronic annotation /// 0030165 // PDZ domain binding // not recorded
Cluster053	RIKEN cDNA 9630041G16 gene /// ferric-chelate reductase 1 like	9630041G16Rik /// Frrs1l	---	0005886 // plasma membrane // inferred from electronic annotation /// 0016020 // membrane // inferred from electronic annotation /// 0016021 // integral component of membrane // inferred from electronic annotation /// 0030054 // cell junction // inferred from electronic annotation /// 0045202 // synapse // inferred from electronic annotation	---
	expressed sequence C81608	C81608	---	---	---
	ferric-chelate reductase 1 like	Frrs1l	---	0005886 // plasma membrane // inferred from electronic annotation /// 0016020 // membrane // inferred from electronic annotation /// 0016021 // integral component of membrane // inferred from electronic annotation /// 0030054 // cell junction // inferred from electronic annotation /// 0045202 // synapse // inferred from electronic annotation	---
	N-myc downstream regulated gene 3	Ndrg3	---	0005737 // cytoplasm // not recorded /// 0005737 // cytoplasm // inferred from sequence or structural similarity /// 0070062 // extracellular vesicular exosome // not recorded	---
	phytanoyl-CoA hydroxylase interacting protein	Phyhip	---	---	0005515 // protein binding // inferred from physical interaction
	transmembrane protein 151B	Tmem151b	---	0016020 // membrane // inferred from electronic annotation /// 0016021 // integral component of membrane // inferred from electronic annotation	---
Cluster056	RIKEN cDNA 5330423I11 gene	5330423I11Rik	---	---	---
	RIKEN cDNA 5830490A04 gene	5830490A04Rik	---	---	---
	RIKEN cDNA 6330436F06 gene	6330436F06Rik	---	---	---
	RIKEN cDNA 6330510M09 gene	6330510M09Rik	---	---	---
	RIKEN cDNA 9630021D06 gene	9630021D06Rik	---	---	---
	predicted gene, 20081	Gm20081	---	---	---
	X Kell blood group precursor related family member 6 homolog	Xkr6	---	0016020 // membrane // inferred from electronic annotation /// 0016021 // integral component of membrane // inferred from electronic annotation	---
Cluster059	shisa homolog 7 (Xenopus laevis)	Shisa7	---	0016020 // membrane // inferred from electronic annotation /// 0016021 // integral component of membrane // inferred from electronic annotation	---
Cluster066	ELAV (embryonic lethal, abnormal vision, Drosophila)-like 2 (Hu antigen B)	Elavl2	---	---	0000166 // nucleotide binding // inferred from electronic annotation /// 0003676 // nucleic acid binding // inferred from electronic annotation /// 0003723 // RNA binding // inferred from electronic annotation /// 0005515 // protein binding // inferred from electronic annotation /// 0044822 // poly(A) RNA binding // not recorded
	ELAV (embryonic lethal, abnormal vision, Drosophila)-like 4 (Hu antigen D)	Elavl4	---	---	0000166 // nucleotide binding // inferred from electronic annotation /// 0003676 // nucleic acid binding // inferred from electronic annotation /// 0003723 // RNA binding // inferred from electronic annotation /// 0017091 // AU-rich element binding // not recorded
	zinc finger, C2HC-type containing 1A	Zc2hc1a	---	---	0046872 // metal ion binding // inferred from electronic annotation
Cluster073	RIKEN cDNA 2010300C02 gene	2010300C02Rik	---	---	---
	uncharacterized 9130022E09	9130022E09	---	---	---
	RIKEN cDNA A230058F20 gene	A230058F20Rik	---	---	---
	CUGBP, Elav-like family member 5	Celf5	---	---	0000166 // nucleotide binding // inferred from electronic annotation /// 0003676 // nucleic acid binding // inferred from electronic annotation
	cortexin 1	Ctxn1	---	0016020 // membrane // inferred from electronic annotation /// 0016021 // integral component of membrane // inferred from electronic annotation /// 0031224 // intrinsic component of membrane // inferred from electronic annotation	---
Cluster077	RIKEN cDNA 2900097C17 gene	2900097C17Rik	---	---	---
	RIKEN cDNA A930009E05 gene /// transmembrane protein 178B	A930009E05Rik /// Tmem178b	---	0016021 // integral component of membrane // inferred from electronic annotation	---
	janus kinase and microtubule interacting protein 2	Jakmip2	---	---	0008017 // microtubule binding // inferred from electronic annotation /// 0019900 // kinase binding // inferred from electronic annotation
Cluster085	RIKEN cDNA 3830403N18 gene /// X-linked lymphocyte-regulated	3830403N18Rik /// Xlr	0002244 // hematopoietic progenitor cell differentiation // inferred from genetic interaction	---	---
	EST C78513	C78513	---	---	---
Cluster088	RIKEN cDNA 1110032F04 gene	1110032F04Rik	---	0016020 // membrane // inferred from electronic annotation /// 0016021 // integral component of membrane // inferred from electronic annotation	---
	RIKEN cDNA 9530059O14 gene	9530059O14Rik	---	---	---
	expressed sequence C78859	C78859	---	---	---
	expressed sequence C78859 /// microRNA 138-2	C78859 /// Mir138-2	0042552 // myelination // inferred from direct assay /// 0071363 // cellular response to growth factor stimulus // inferred from direct assay	---	---
	family with sequence similarity 184, member B	Fam184b	---	---	---
	uncharacterized LOC102634995	LOC102634995	---	---	---
	expressed sequence N28178	N28178	---	---	0046872 // metal ion binding // inferred from electronic annotation
Cluster089	RIKEN cDNA 4930429B21 gene	4930429B21Rik	---	---	---
	RIKEN cDNA 9330121K16 gene	9330121K16Rik	---	---	---
	family with sequence similarity 189, member A1	Fam189a1	---	0016020 // membrane // inferred from electronic annotation /// 0016021 // integral component of membrane // inferred from electronic annotation	---
	family with sequence similarity 81, member A	Fam81a	---	---	---
Cluster090	predicted gene, 19439	Gm19439	---	---	---
	proline rich 18	Prr18	---	---	---
Cluster091	oligodendrocytic myelin paranodal and inner loop protein	Opalin	---	0005794 // Golgi apparatus // not recorded /// 0005886 // plasma membrane // inferred from direct assay /// 0016020 // membrane // inferred from electronic annotation /// 0016021 // integral component of membrane // inferred from electronic annotation	---
Cluster096	RIKEN cDNA A530079E22 gene	A530079E22Rik	---	---	---
	ankyrin repeat domain 63	Ankrd63	---	---	0005515 // protein binding // inferred from electronic annotation
	family with sequence similarity 115, member A	Fam115a	---	---	---
	SH2 domain containing 5	Sh2d5	---	---	0005515 // protein binding // inferred from electronic annotation
	sosondowah ankyrin repeat domain family member A	Sowaha	---	---	0005515 // protein binding // inferred from electronic annotation
Cluster099	RIKEN cDNA A330008L17 gene	A330008L17Rik	---	---	---
