# Supplementary material for: Analysis of gene expression in the nervous system identifies key genes and novel candidates for health and disease
Source: Neurogenetics. 2017 Feb 11;18(2):81–95. doi: 10.1007/s10048-017-0509-5 (PMC5359387; doi:10.1007/s10048-017-0509-5)
Supplement: Supplementary file 7 — Expression of poorly annotated genes in other datasets (XLSX 17 kb) [file 10048_2017_509_MOESM7_ESM.xlsx]

## Sheet: Sheet 1
Analysis of gene expression in the nervous system identifies key genes and novel candidates for health and disease
Neurogenetics
Sarah M Carpanini, Thomas M Wishart, Thomas H Gillingwater, Jean C Manson and Kim M Summers
Corresponding author: Professor Kim M Summers The Roslin Institute and Royal (Dick) School of Veterinary Studies, University of Edinburgh, Easter Bush, Midlothian, EH25 9RG, UK; kim.summers@roslin.ed.ac.uk
Abbreviations: ISH- in situ hybridisation, OLF- olfactory areas, HPF-hippocampal formation, CTXsp-cortical subplate, STR-striatum, PAL-pallidum, TH-thalamus, HY-hypothalamus, MB-midbrain, P-pons, MY-medulla, CB-cerebellum
	Gene symbol	Allen brain atlas (ISH in C57BL6J)	Jax In Situ-expressed in brain (MGI gene expression data- expressed in brain, wt only)	Biogps-human	Biogps-pig
Cluster005	2900011O08Rik	Isocortex, OLF, HPF, CTXsp, STR, PAL, TH, HY, MB, P, MY, CB	Yes	Gene not found	Gene not found
	A830039N20Rik	Isocortex, OLF, HPF, CTXsp, STR, PAL, TH, HY, MB, P, MY, CB		Gene not found	Gene not found
	Ankrd34a	Isocortex, OLF, HPF, CTXsp, STR, PAL, TH, HY, MB, P, MY, CB		Enriched in amygdala & whole brain	No data
	AW060742	Isocortex, OLF, HPF, CTXsp, STR, PAL, HY, CB		Gene not found	Gene not found
	B230217C12Rik	Isocortex, OLF, HPF, CTXsp, STR, PAL, TH, HY, MB, P, MY, CB		Gene not found	Gene not found
	Fam69b	Isocortex, OLF, HPF, CTXsp, STR, PAL, TH, HY, MB, P, MY, CB		No data	Enriched in prefrontal cortex
	Fbxo41	Isocortex, OLF, HPF, CTXsp, STR, PAL, TH, HY, MB, P, MY, CB	Yes	Enriched in brain	Enriched in prefrontal cortex
	Gdap1l1	Isocortex, OLF, HPF, CTXsp, STR, PAL, TH, HY, MB, P, MY, CB	Yes	Enriched in whole brain & fetal brain	Enriched in nervous system & pancreas
	Golga7b	Isocortex, OLF, HPF, CTXsp, STR, PAL, TH, HY, MB, P, MY, CB		Enriched in brain	No data
	LOC101055948			Gene not found	Gene not found
	Pgbd5	Isocortex, OLF, HPF, CTXsp, STR, PAL, TH, HY, MB, P, MY, CB		Enriched in brain	No data
	Ralyl	Isocortex, OLF, HPF, CTXsp, STR, PAL, TH, HY, MB, P, MY, CB	Yes	Enriched in brain	No data
	Spryd3	Isocortex, OLF, HPF, CTXsp, STR, PAL, TH, HY, MB, P, MY, CB		Enriched in brain	Enriched in hind brain (medulla)
	Tmem151a	Isocortex, OLFM HPF, CTXsp, STR, TH, MB	Yes	Ubiquitous	No data
	Tmem179	Isocortex, OLF, HPF, CTXsp, STR, PAL, TH, HY, MB, P, MY, CB	Yes	Ubiquitous	Gene not found
	Unc80	Isocortex, OLF, HPF, CTXsp, STR, PAL, TH, HY, MB, P, MY, CB		Ubiquitous	Enriched in cortex, hindbrain and cerebellum
	Vps13c	NOT EXPRESSED	Yes	Ubiquous, enriched in immune cells in 1 dataset	No data
	Vsnl1	Isocortex, OLF, HPF, CTXsp, STR, PAL, TH, HY, MB, P, MY, CB	Yes	Sole expression in brain	Enriched in cortex, hindbrain and cerebellum
Cluster006	2310022B05Rik	Isocortex, OLF, HPF, CTXsp, STR, PAL, TH, HY, MB, P, MY, CB	Yes	Gene not found	Gene not found
	2900052N01Rik	NOT EXPRESSED		Gene not found	Gene not found
	4933431E20Rik	NOT EXPRESSED		Gene not found	Gene not found
	5930412G12Rik	NOT EXPRESSED		Gene not found	Gene not found
	A730056I06Rik		Yes	Gene not found	Gene not found
	AB352356			Gene not found	Gene not found
	AW047730			Gene not found	Gene not found
	Baalc	Isocortex, OLF, HPF, CTXsp, PAL, TH, MB, P, CB	Yes	Enriched in brain	Enriched in nervous system tissues & thyroid
	Gm13111			Gene not found	Gene not found
	Gm5089	NOT EXPRESSED		Gene not found	Gene not found
	Gm6556			Gene not found	Gene not found
	Nkain4	NOT EXPRESSED	Yes	Ubiquitous- slight enrichment in brain & leukemialymphoblastic (MOLT-4)	Gene not found
	Olfml1	Isocortex, OLF, HPF, CTXsp, STR, PAL, TH, HY, MB, P, MY, CB		Ubiquitous	No data
	Pantr1	HPF		No data	Gene not found
	Scara3	Isocortex, OLFM HPF, CTXsp, STR, P, MY, CB		Enriched in uterus corpus	No data
	Tlcd1	CB		Ubiquitous	Ubiquitous
	Tmem229a	NOT EXPRESSED		No data	Enriched in placenta
	Tmem47	Isocortex, OLF, HPF, CTXsp, STR, PAL, TH, HY, MB, P, CB	Yes	Enriched in nervous system	Ubiquitous
Cluster014	1110001J03Rik	NOT EXPRESSED		Gene not found	Gene not found
	Ankrd40	Isocortex, OLF, HPF, CTXsp, STR, PAL, TH, HY, MB, P, MY, CB		Ubiquitous	Enriched in spinal cord
	Apoo	MY, CB		Enriched in brain & 721 B lymphoblasts	No data
	D10Jhu81e	Isocortex, OLF, HPF, CTXsp, STR, PAL, TH, HY, MB, P, MY, CB	Yes	Gene not found	Gene not found
	Fam210a	Isocortex, OLF, HPF, CTXsp, STR, PAL, TH, HY, MB, P, MY, CB		Ubiquitous- enricheed in 721 B lymphoblasts	No data
	Uqcc1	Isocortex, OLF, HPF, CTXsp, STR, PAL, TH, HY, MB, P, MY, CB	Yes	Ubiquitous- enirched in Burkitts lymphoma (Raji) & 721 B lymphoblasts with slight enrichment in brain	Gene not found
Cluster027	A330043J11Rik			Gene not found	Gene not found
	AF529169	HY, MB, P, MY		Enriched in RPE and DRG	Gene not found?
	D930028M14Rik	NOT EXPRESSED	Yes	Gene not found	Gene not found
	Gm2102			Gene not found	Gene not found
	Klhl5	Isocortex, OLFM HPF, CTXsp, STR, PAL, TH, HY	Yes	Enriched in colorectaladenocarcinoma, bronchialepithelial cells, smooth muscle & cardiomyocytes	No data
	Pirt	NOT EXPRESSED	Yes	No data	Gene not found
	Tmem132e	NOT EXPRESSED	Yes	Ubiquitous	Enriched in pancreas (LOC100519732)
Cluster030	2900054C01Rik			Gene not found	Gene not found
	2900055J20Rik			Gene not found	Gene not found
	A830010M20Rik	Isocortex, OLF, HPF, CTXsp, STR, TH	Yes	Gene not found	Gene not found
	D430041D05Rik	Isocortex, OLF, HPF, CTXsp, STR, PAL, TH, HY, MB, P, MY, CB	Yes	Gene not found	Gene not found
	Gm10419			Gene not found	Gene not found
	Gm10699			Gene not found	Gene not found
	Gm1976			Gene not found	Gene not found
	Pcnxl2	Isocortex, OLF, HPF, CTXsp, TH, MB, P, MY		Enriched in prefrontal cortex in 1 dataset	No data
	Pianp	Isocortex, OLF, HPF, CTXsp, STR, PAL, TH, HY, MB, P, MY, CB		Enriched in brain	Enriched in brain
	Sgtb	Isocortex, OLF, HPF, CTXsp, STR, PAL, TH, HY, MB, P, MY, CB	Yes	Ubiquitous	Enriched in prefrontal cortex
	Sh3rf3	Isocortex, OLF, HPF, CTXsp	Yes	No data	No data (LOC102165290)
	Tmem191c	Isocortex		No data	Ubiquitous
Cluster035	9630013A20Rik			Gene not found	Gene not found
	AI314604			Gene not found	Gene not found
	C530044C16Rik			Gene not found	Gene not found
	Fam13c	NOT EXPRESSED	Yes	Ubiquitous	Ubiquitous- enriched in trachea & oesophagus
	Frmd8	NOT EXPRESSED		Ubiquitous	No data
	Lhfpl3	OLF	Yes	Ubiquitous	No data
	Slain1	Isocortex, OLF, HPF, CTXsp, STR, PAL, TH, HY, MB, P, MY, CB	Yes	Enriched in nervous system	Enriched in nervous system (LOC100526183)
	Sox2ot	Isocortex, OLF, HPF, CTXsp, STR, PAL, TH, HY, MB, P, MY, CB	Yes	Ubiquitous- enriched in brain in 1 dataset	Gene not found
	Tmem125	OLF, CTXsp, STR, PAL, HY, P, MY	Yes	Enriched in thyroid, prostate & lung	No data
	Tmem88b	Isocortex, OLF, HPF, CTXsp, STR, PAL, TH, HY, MB, P, MY, CB	Yes	No data	Enriched in spinal cord
	Tssc4	NOT EXPRESSED		Ubiquitous- highest expression in heart and CD14+ monocytes	Gene not found
Cluster037	2900064K03Rik			Gene not found	Gene not found
	9530056K15Rik	NOT EXPRESSED		Gene not found	Gene not found
	9630002A11Rik			Gene not found	Gene not found
	9630005C17Rik	NOT EXPRESSED		Gene not found	Gene not found
	A930017K11Rik			Gene not found	Gene not found
	C130075A20Rik			Gene not found	Gene not found
	Cnpy1		Yes	Ubiquitous	No data
	D4Ertd298e			Gene not found	Gene not found
	Gm2694		Yes	Gene not found	Gene not found
	Gm5083	TH, CB		Gene not found	Gene not found
	Lhx1os		Yes	Gene not found	Gene not found
	Zfhx2os	OLF, HPF, CTXsp, CB	Yes	Gene not found	Gene not found
Cluster042	2900018E21Rik			Gene not found	Gene not found
	3110039M20Rik			Gene not found	Gene not found
	9130230N09Rik /// LOC102635645			Gene not found	Gene not found
	9330156P08Rik			Gene not found	Gene not found
	C030004M13Rik			Gene not found	Gene not found
	C030011L09Rik			Gene not found	Gene not found
	Gm10421			Gene not found	Gene not found
	Gprin3	CTXsp, STR, PAL		No data	Ubiquitous- enriched in adrenal gland (cortex)
	Lrrc10b	NOT EXPRESSED	No	Ubiquitous	No data
Cluster045	A930033H14Rik	OLF, CTXsp, MY, CB		Gene not found	Gene not found
	Grrp1	NOT EXPRESSED	Yes	Ubiquitous	No data
	LOC102635316			Gene not found	Gene not found
Cluster048	Cyyr1	NOT EXPRESSED	Yes	Ubiquitous	Enriched in optic nerve & lung parenchyma
	Gm20748			Gene not found	Gene not found
	Higd1b	HPF, CTXsp, MY, CB		Enriched in lung	Ubiquitous
	She	NOT EXPRESSED		Ubiquitous	Enriched in adult male testis
	Tm4sf1	Isocortex, OLF, HPF, CTXsp, STR, PAL, TH, MB, MY, CB	Yes	Enriched in fetal lung & cardiac myocytes	Enriched in inferior vena cava, adrenal gland (cortex) & placenta
	Ushbp1	Isocortex, HPF		Ubiquitous	No data
Cluster053	9630041G16Rik /// Frrs1l			Gene not found	Gene not found
	C81608			Enriched in brain	Gene not found
	Frrs1l	Isocortex, OLF, HPF, CTXsp, TH, CB	Yes	Enriched in brain	No data
	Ndrg3	Isocortex, OLF, HPF, CTXsp, STR, PAL, TH, HY, MB, P, MY, CB	Yes	Enriched in brain	No data
	Phyhip	Isocortex, OLF, HPF, CTXsp, STR, PAL, TH, HY, MB, P, MY, CB	Yes	Enriched in brain	Expressed in prefrontal cortex and cerebellum
	Tmem151b	OLF, MY, CB	Yes	Enriched in brain	Ubiquitous
Cluster056	5330423I11Rik			Gene not found	Gene not found
	5830490A04Rik			Gene not found	Gene not found
	6330436F06Rik			Gene not found	Gene not found
	6330510M09Rik			Gene not found	Gene not found
	9630021D06Rik			Gene not found	Gene not found
	Gm20081			Gene not found	Gene not found
	Xkr6	Isocortex, OLF, HPF, CTXsp, STR, PAL, TH, HY, MB, P, MY, CB	Yes	Ubiquitous	Ubiquitous- enriched in cerebellum in one dataset
Cluster059	Shisa7	Isocortex, OLF, HPF, CTXsp, STR, PAL, TH, HY, MB, P, MY, CB	Yes	No data	Gene not found
Cluster066	Elavl2	Isocortex, OLF, HPF, CTXsp, STR, PAL, TH, HY, MB, P, MY, CB	Yes	Ubiquitous	Enriched in brain, rectum & testis
	Elavl4		Yes	Enriched in brain	Gene not found
	Zc2hc1a	NOT EXPRESSED	Yes	Enriched in fetal brain	Ubiquitous- slightly higher in brain
Cluster073	2010300C02Rik	Isocortex, OLF, HPF, CTXsp, STR, PAL, TH, HY, MB, CB		Gene not found	Gene not found
	9130022E09			Gene not found	Gene not found
	A230058F20Rik			Gene not found	Gene not found
	Celf5	Isocortex, HPF, CTXsp	Yes	No data	No data
	Ctxn1	Isocortex, OLF, HPF, CTXsp, STR, PAL, TH, HY, MB, P, MY, CB	Yes	No data	No data
Cluster077	2900097C17Rik	Isocortex, OLF, HPF, CTXsp, STR, PAL, TH, HY, MB, P, MY, CB		Gene not found	Gene not found
	A930009E05Rik /// Tmem178b	Isocortex, OLF, HPF, CTXsp, STR, PAL, TH, HY, MB, P, MY, CB		No data (Tmem178b)	No data (Tmem178b)
	Jakmip2	NOT EXPRESSED		Enriched in prefronal cortex	No data
Cluster085	3830403N18Rik /// Xlr	NOT EXPRESSED	Xlr-No	Gene not found	Gene not found
	C78513			Gene not found	Gene not found
Cluster088	1110032F04Rik			Gene not found	Gene not found
	9530059O14Rik			Gene not found	Gene not found
	C78859			Gene not found	Gene not found
	C78859 /// Mir138-2		Mir138-2- Yes	No data (Mir138-2)	Gene not found
	Fam184b		Yes	Ubiquitous	Enriched in salivary glands (submandibular)
	LOC102634995			Gene not found	Gene not found
	N28178			Gene not found	Gene not found
Cluster089	4930429B21Rik	Isocortex, OLFM, HPF, CTXsp, STR, PAL, TH, MB, P, MY, CB		Gene not found	Gene not found
	9330121K16Rik			Gene not found	Gene not found
	Fam189a1	Isocortex, OLFM, HPF, CTXsp, STR, PAL, TH, MB, P, MY, CB	Yes	Enriched in brain	Gene not found
	Fam81a	Isocortex, OLFM, HPF, CTXsp, STR, PAL, TH, HY, MB, MY, CB	Yes	No data	Enriched in cortex, liver & fallopian tube
Cluster090	Gm19439			Gene not found	Gene not found
	Prr18	Isocortex, OLF, HPF, CTXsp, STR, PAL, TH, HY, MB, P, MY, CB		Ubiquitous	No data
Cluster091	Opalin	Isocortex, OLF, HPF, CTXsp, STR, PAL, TH, HY, MB, P, MY, CB	Yes	Enriched in brain	Enriched in nervous system
Cluster096	A530079E22Rik	Isocortex, OLF, HPF, CTXsp, STR, PAL		Gene not found	Gene not found
	Ankrd63			No data	Enriched in pancreas
	Fam115a		aka Tcaf1- yes	Enriched in prefrontal cortex	Gene not found
	Sh2d5	Isocortex, OLF, HPF, CTXsp, STR, PAL, TH, HY, MB, P, MY, CB		No data	Ubiquitous
	Sowaha	Isocortex, OLF, HPF, CTXsp, STR, PAL	Yes	Enriched in colorectaladenocarcinoma	No data
Cluster099	A330008L17Rik	NOT EXPRESSED		Gene not found	Gene not found
